# Supplementary material for: Transcriptome analysis of trigeminal ganglia following masseter muscle inflammation in rats
Source: PubMed Central journal article supplement — Mol Pain. 2016 Oct 4;12:1744806916668526. doi: 10.1177/1744806916668526 (PMC5066585; doi:10.1177/1744806916668526), 2016-10-04
Supplement: MPX668526_DS.pdf [file MPX668526_DS.pdf]

Read Count All : Averaged read count of all samples from Naive and CFA  
 Read Count Naive : Mean FPKM of four control group samples  
 Read Count CFA : Mean FPKM of four CFA-injected group samples  
 FC : Fold change (CFA/Naive)  
 LFC : Log(fold change)  
 FDR : False Discovery Rate corrected p value

- Group code**
- 1 : Exclusively Pain gene
  - 2 : Exclusively Sensory neuronal genes
  - 3 : Exclusively TRPV1 lineage genes
  - 4 : Common genes between Pain genes and sensory neuronal genes
  - 5 : Common genes between Sensory neuronal genes and TRPV1 lineage genes
  - 6 : Common genes between Pain genes and TRPV1 lineage genes
  - 7 : Common genes among Pain genes and Sensory neuronal genes and TRPV1 lineage genes

Entire candidate genes (2320)

Differentially regulated candidate genes (622)

| Feature.ID            | All      | Naive    | CFA      | FC   | LFC    | p Value  | FDR           | gene_symbol                                                    | gene_name                                                                                    | group |
|-----------------------|----------|----------|----------|------|--------|----------|---------------|----------------------------------------------------------------|----------------------------------------------------------------------------------------------|-------|
| ENSRNOG00000043341    | 64.83    | 64.17    | 65.49    | 1.02 | 0.03   | 0.937142 | 1.3110052M02R | RIKEN cDNA 3110052M02 gene [Source:MGI Symbol;Acc:MGI:1920479] |                                                                                              | 2     |
| ENSRNOG00000005935    | 5530.64  | 5105.96  | 5955.32  | 1.17 | 0.22   | 0.003503 | 0.023723973   | A3galat2                                                       | alpha 1,3-galactosyltransferase 2 [Source:RGD Symbol;Acc:727913]                             | 5     |
| ENSRNOG00000000967    | 4107.21  | 4204.84  | 4009.58  | 0.95 | -0.07  | 0.393695 | 0.711690705   | Aacs                                                           | acetoacetyl-CoA synthetase [Source:RGD Symbol;Acc:708522]                                    | 2     |
| ENSRNOG000000011861   | 43.00    | 34.97    | 51.03    | 1.46 | 0.55   | 0.04369  | 0.168028571   | Aadat                                                          | aminoadipate aminotransferase [Source:RGD Symbol;Acc:2948]                                   | 2     |
| ENSRNOG000000004378   | 1118.11  | 969.43   | 1266.79  | 1.31 | 0.39   | 4.12E-05 | 0.00055069    | Abca5                                                          | ATP-binding cassette, subfamily A (ABC1), member 5 [Source:RGD Symbol;Acc:628661]            | 3     |
| ENSRNOG000000017993   | 665.66   | 686.82   | 644.50   | 0.94 | -0.09  | 0.42427  | 0.74467731    | Abcb10                                                         | ATP-binding cassette, subfamily B (MDR/TAP), member 10 [Source:RGD Symbol;Acc:1311222]       | 2     |
| ENSRNOG000000022719   | 16.66    | 19.16    | 14.15    | 0.74 | -0.44  | 0.26498  | 0.566386429   | Abcb1b                                                         | ATP-binding cassette, subfamily B (MDR/TAP), member 1B [Source:RGD Symbol;Acc:3318]          | 1     |
| ENSRNOG000000029207   | 81.32    | 89.52    | 73.12    | 0.82 | -0.29  | 0.201341 | 0.479886968   | Abcb4                                                          | ATP-binding cassette, subfamily B (MDR/TAP), member 4 [Source:RGD Symbol;Acc:620248]         | 2     |
| ENSRNOG000000002948   | 208.10   | 222.49   | 193.70   | 0.87 | -0.20  | 0.215614 | 0.500346973   | Abcc3                                                          | ATP-binding cassette, subfamily C (CFTR/MRP), member 3 [Source:RGD Symbol;Acc:71101]         | 1     |
| ENSRNOG000000010064   | 506.70   | 449.84   | 563.56   | 1.25 | 0.33   | 0.006543 | 0.039388868   | Abcc4                                                          | ATP-binding cassette, subfamily C (CFTR/MRP), member 4 [Source:RGD Symbol;Acc:620266]        | 1     |
| ENSRNOG000000005420   | 53.15    | 57.32    | 48.99    | 0.85 | -0.23  | 0.325056 | 0.637312831   | Abcc8                                                          | ATP-binding cassette, subfamily G (WHITE), member 8 [Source:RGD Symbol;Acc:620300]           | 3     |
| ENSRNOG000000012073   | 892.04   | 891.33   | 892.74   | 1.00 | 0.00   | 0.943909 | 1             | Abhd14b                                                        | abhydrolase domain containing 14b [Source:RGD Symbol;Acc:1359649]                            | 2     |
| ENSRNOG000000000221   | 708.22   | 629.06   | 787.38   | 1.25 | 0.32   | 0.008395 | 0.023133558   | Abhd5                                                          | abhydrolase domain containing 5 [Source:RGD Symbol;Acc:1303237]                              | 2     |
| ENSRNOG000000031325   | 1673.41  | 1571.02  | 1775.79  | 1.13 | 0.18   | 0.048754 | 0.181913843   | Abi1                                                           | abl-interactor 1 [Source:RGD Symbol;Acc:621008]                                              | 2     |
| ENSRNOG000000022216   | 7256.26  | 6824.93  | 7687.60  | 1.13 | 0.17   | 0.020126 | 0.094377927   | Abr                                                            | active BCR-related [Source:RGD Symbol;Acc:1306279]                                           | 2     |
| ENSRNOG000000037815   | 702.90   | 726.39   | 679.41   | 0.94 | -0.10  | 0.361849 | 0.677817636   | Acad10                                                         | acyl-CoA dehydrogenase family, member 10 [Source:RGD Symbol;Acc:1310159]                     | 2     |
| ENSRNOG000000022307   | 1888.17  | 1920.43  | 1855.90  | 0.97 | -0.05  | 0.577101 | 0.859985648   | Acap3                                                          | ArfGAP with coiled-coil, ankyrin repeat and PH domains 3 [Source:RGD Symbol;Acc:1310711]     | 2     |
| ENSRNOG000000003108   | 1388.84  | 1482.21  | 1295.47  | 0.87 | -0.19  | 0.034011 | 0.139535118   | Acbd4                                                          | acyl-CoA binding domain containing 4 [Source:RGD Symbol;Acc:1308404]                         | 2     |
| ENSRNOG000000031665   | 100.49   | 140.83   | 60.16    | 0.43 | -1.23  | 6.82E-09 | 2.03E-07      | Ace2                                                           | angiotensin I converting enzyme 2 [Source:RGD Symbol;Acc:728890]                             | 1     |
| ENSRNOG000000050841   | 9485.97  | 9402.31  | 9569.64  | 1.02 | 0.03   | 0.742819 | 0.977229637   | Ache                                                           | acetylcholinesterase [Source:MGI Symbol;Acc:MGI:87876]                                       | 1     |
| ENSRNOG000000013533   | 4091.68  | 4462.51  | 3720.85  | 0.83 | -0.26  | 0.000863 | 0.007550917   | Acin1                                                          | apoptotic chromatin condensation inducer 1 [Source:RGD Symbol;Acc:1311945]                   | 2     |
| ENSRNOG000000016924   | 14854.69 | 14488.50 | 15220.87 | 1.05 | 0.07   | 0.327314 | 0.63970781    | Acly                                                           | ATP citrate lyase [Source:RGD Symbol;Acc:2018]                                               | 2     |
| ENSRNOG000000011820   | 929.07   | 808.51   | 1049.63  | 1.30 | 0.38   | 0.000173 | 0.001947931   | Acpp                                                           | acid phosphatase, prostate [Source:RGD Symbol;Acc:2023]                                      | 7     |
| ENSRNOG000000010633   | 2933.95  | 2963.36  | 2904.54  | 0.98 | -0.03  | 0.68157  | 0.93853967    | Acsl1                                                          | acyl-CoA synthetase long-chain family member 1 [Source:RGD Symbol;Acc:2015]                  | 1     |
| ENSRNOG000000001408   | 1074.75  | 1105.15  | 1044.35  | 0.94 | -0.08  | 0.401522 | 0.720863301   | Act16b                                                         | actin-like 6B [Source:RGD Symbol;Acc:1307763]                                                | 5     |
| ENSRNOG000000004309   | 639.69   | 704.42   | 574.97   | 0.82 | -0.29  | 0.010232 | 0.055972087   | Actn1                                                          | actinin, alpha 1 [Source:RGD Symbol;Acc:70907]                                               | 5     |
| ENSRNOG000000010265   | 502.25   | 590.34   | 414.16   | 0.70 | -0.51  | 4.17E-05 | 0.000561872   | Ada                                                            | adenosine deaminase [Source:RGD Symbol;Acc:2031]                                             | 1     |
| ENSRNOG000000002753   | 6505.93  | 5908.96  | 7102.90  | 1.20 | 0.27   | 0.000297 | 0.003085686   | Adam11                                                         | ADAM metalloproteinase domain 11 [Source:RGD Symbol;Acc:1307515]                             | 5     |
| ENSRNOG000000017518   | 0.41     | 0.29     | 0.53     | 1.81 | 0.86   | 1        | 1             | Adam5                                                          | a disintegrin and metalloproteinase domain 5 [Source:RGD Symbol;Acc:621471]                  | 5     |
| ENSRNOG000000017897   | 149.70   | 165.06   | 134.34   | 0.81 | -0.30  | 0.099583 | 0.301706444   | Adam8                                                          | ADAM metalloproteinase domain 8 [Source:RGD Symbol;Acc:1306394]                              | 2     |
| ENSRNOG000000016812   | 215.46   | 175.05   | 255.88   | 1.46 | 0.55   | 0.000747 | 0.006705079   | Adamts16                                                       | ADAM metalloproteinase with thrombospondin type 1 motif, 16 [Source:RGD Symbol;Acc:1310046]  | 3     |
| ENSRNOG000000027463   | 201.83   | 191.75   | 211.91   | 1.11 | 0.14   | 0.406473 | 0.725969514   | Adamts3                                                        | ADAM metalloproteinase with thrombospondin type 1, motif 3 [Source:RGD Symbol;Acc:1310750]   | 1     |
| ENSRNOG000000001606   | 780.84   | 776.34   | 785.35   | 1.01 | 0.02   | 0.800375 | 1             | Adamts5                                                        | ADAM metalloproteinase with thrombospondin type 1 motif, 5 [Source:RGD Symbol;Acc:735196]    | 2     |
| ENSRNOG000000023257   | 319.36   | 351.70   | 287.02   | 0.82 | -0.29  | 0.037406 | 0.149953538   | Adamts9                                                        | ADAM metalloproteinase with thrombospondin type 1 motif, 9 [Source:RGD Symbol;Acc:1306889]   | 2     |
| ENSRNOG000000042650   | 1275.95  | 1224.02  | 1327.88  | 1.08 | 0.12   | 0.205181 | 0.485787762   | Adc                                                            | arginine decarboxylase [Source:MGI Symbol;Acc:MGI:2442093]                                   | 2     |
| ENSRNOG000000008276   | 257.65   | 255.64   | 259.67   | 1.02 | 0.02   | 0.777587 | 0.997098686   | Adcy1                                                          | adenylate cyclase 1 [brain] [Source:RGD Symbol;Acc:1309318]                                  | 1     |
| ENSRNOG000000002229   | 1391.03  | 1294.74  | 1487.33  | 1.15 | 0.20   | 0.024389 | 0.10968243    | Adcy5                                                          | adenylate cyclase 5 [Source:RGD Symbol;Acc:71014]                                            | 4     |
| ENSRNOG000000014776   | 742.33   | 685.59   | 799.07   | 1.17 | 0.22   | 0.032954 | 0.136345675   | Adcy7                                                          | adenylate cyclase 7 [Source:RGD Symbol;Acc:619966]                                           | 1     |
| ENSRNOG000000004890   | 318.92   | 289.76   | 348.08   | 1.20 | 0.26   | 0.026203 | 0.218177192   | Adcy8                                                          | adenylate cyclase 8 (brain) [Source:RGD Symbol;Acc:2036]                                     | 1     |
| ENSRNOG000000049882   | 2074.96  | 1771.92  | 2378.00  | 1.34 | 0.42   | 5.79E-07 | 1.21E-05      | Adcyap1                                                        | adenylate cyclase activating polypeptide 1 [Source:RGD Symbol;Acc:2037]                      | 4     |
| ENSRNOG000000012098   | 88.77    | 83.29    | 94.24    | 1.13 | 0.18   | 0.439975 | 0.759021555   | Adcyap1r1                                                      | adenylate cyclase activating polypeptide 1 receptor 1 [Source:RGD Symbol;Acc:2038]           | 1     |
| ENSRNOG000000012325   | 2972.14  | 2831.67  | 3112.61  | 1.10 | 0.14   | 0.106668 | 0.316451314   | Adk                                                            | adenosine kinase [Source:RGD Symbol;Acc:2046]                                                | 5     |
| ENSRNOG000000027030   | 82.45    | 101.27   | 63.63    | 0.63 | -0.67  | 0.002615 | 0.01881695    | Adm                                                            | adrenomedullin [Source:RGD Symbol;Acc:2047]                                                  | 1     |
| ENSRNOG000000003442   | 2306.80  | 2085.13  | 2528.46  | 1.21 | 0.28   | 0.000543 | 0.005128808   | Adora1                                                         | adenosine A1 receptor [Source:RGD Symbol;Acc:2048]                                           | 1     |
| ENSRNOG00000001302    | 581.43   | 554.65   | 608.21   | 1.10 | 0.13   | 0.248405 | 0.544465746   | Adora2a                                                        | adenosine A2a receptor [Source:RGD Symbol;Acc:2049]                                          | 1     |
| ENSRNOG000000002922   | 150.05   | 133.85   | 166.26   | 1.24 | 0.31   | 0.103524 | 0.310056721   | Adora2b                                                        | adenosine A2b receptor [Source:RGD Symbol;Acc:2050]                                          | 6     |
| ENSRNOG000000015788   | 0.12     | 0.24     | 0.00     | 0.00 | #NAME? | 0.964516 | 1             | Adora3                                                         | adenosine A3 receptor [Source:RGD Symbol;Acc:2051]                                           | 1     |
| ENSRNOG000000009522   | 15.45    | 13.45    | 17.44    | 1.30 | 0.37   | 0.339664 | 0.65324136    | Adra1a                                                         | adrenoceptor alpha 1A [Source:RGD Symbol;Acc:2055]                                           | 1     |
| ENSRNOG000000021256   | 42.33    | 52.03    | 32.63    | 0.63 | -0.67  | 0.010167 | 0.061793271   | Adra1d                                                         | adrenoceptor alpha 1D [Source:RGD Symbol;Acc:62064]                                          | 1     |
| ENSRNOG000000047545   | 291.10   | 308.21   | 274.00   | 0.89 | -0.17  | 0.256584 | 0.555500256   | Adra2a                                                         | adrenoceptor alpha 2A [Source:RGD Symbol;Acc:2056]                                           | 1     |
| ENSRNOG000000013887   | 5.31     | 5.56     | 5.06     | 0.91 | -0.13  | 0.848127 | 1             | Adra2b                                                         | adrenoceptor alpha 2B [Source:RGD Symbol;Acc:2057]                                           | 3     |
| ENSRNOG000000009299   | 1015.55  | 1070.17  | 960.92   | 0.90 | -0.16  | 0.116556 | 0.335972952   | Adra2c                                                         | adrenoceptor alpha 2C [Source:RGD Symbol;Acc:2058]                                           | 1     |
| ENSRNOG000000017002   | 27.38    | 29.63    | 25.12    | 0.85 | -0.24  | 0.446383 | 0.76372228    | Adrb1                                                          | adrenoceptor beta 1 [Source:RGD Symbol;Acc:2059]                                             | 6     |
| ENSRNOG000000019217   | 69.86    | 78.23    | 61.50    | 0.79 | -0.35  | 0.12698  | 0.353934303   | Adrb2                                                          | adrenoceptor beta 2, surface [Source:RGD Symbol;Acc:2060]                                    | 1     |
| ENSRNOG000000012674   | 1.95     | 3.21     | 0.69     | 0.21 | -2.22  | 0.045732 | 0.173253203   | Adrb3                                                          | adrenoceptor beta 3 [Source:RGD Symbol;Acc:2061]                                             | 1     |
| ENSRNOG000000018985   | 3770.27  | 3823.14  | 3717.40  | 0.97 | -0.04  | 0.627944 | 0.898736834   | Adrbk1                                                         | adrenergic, beta, receptor kinase 1 [Source:RGD Symbol;Acc:2062]                             | 7     |
| ENSRNOG000000023333   | 63.85    | 42.41    | 85.30    | 2.01 | 1.01   | 2.47E-05 | 0.000353225   | Aff2                                                           | AF4/FMR2 family, member 2 [Source:RGD Symbol;Acc:1565592]                                    | 5     |
| ENSRNOG000000018830   | 580.92   | 487.11   | 674.72   | 1.39 | 0.47   | 3.91E-05 | 0.000530519   | Aff3                                                           | AF4/FMR2 family, member 3 [Source:RGD Symbol;Acc:1308527]                                    | 2     |
| ENSRNOG000000000439   | 147.26   | 185.81   | 108.70   | 0.59 | -0.77  | 2.74E-05 | 0.000386703   | Ager                                                           | advanced glycosylation end product-specific receptor [Source:RGD Symbol;Acc:69258]           | 2     |
| ENSRNOG000000015619   | 2833.07  | 2528.15  | 3137.99  | 1.24 | 0.31   | 0.000126 | 0.001476363   | Agfg1                                                          | ArfGAP with FG repeats 1 [Source:RGD Symbol;Acc:1560041]                                     | 1     |
| ENSRNOG000000001404   | 1045.78  | 1099.09  | 992.47   | 0.90 | -0.15  | 0.131748 | 0.363357587   | Agfg2                                                          | ArfGAP with FG repeats 2 [Source:RGD Symbol;Acc:1306590]                                     | 2     |
| ENSRNOG000000011509   | 760.95   | 726.95   | 794.96   | 1.09 | 0.13   | 0.22235  | 0.510122405   | Agk                                                            | acylglycerol kinase [Source:RGD Symbol;Acc:1562046]                                          | 2     |
| ENSRNOG000000025596   | 39.08    | 34.98    | 43.19    | 1.23 | 0.30   | 0.281854 | 0.587752671   | Ago4                                                           | argonate RISC catalytic component 4 [Source:RGD Symbol;Acc:1304583]                          | 2     |
| ENSRNOG000000000437   | 4613.43  | 4755.16  | 4471.71  | 0.94 | -0.09  | 0.276791 | 0.581939135   | Agpat1                                                         | 1-acylglycerol-3-phosphate O-acyltransferase 1 [Source:RGD Symbol;Acc:1303287]               | 1     |
| ENSRNOG000000017731   | 2246.13  | 2111.05  | 2381.21  | 1.13 | 0.17   | 0.045076 | 0.171519816   | Agpat4                                                         | 1-acylglycerol-3-phosphate O-acyltransferase 4 [Source:RGD Symbol;Acc:619916]                | 2     |
| ENSRNOG000000039001   | 16.00    | 18.24    | 13.77    | 0.76 | -0.41  | 0.283955 | 0.588978428   | Agpr                                                           | agouti related neuropeptide [Source:RGD Symbol;Acc:2068]                                     | 1     |
| ENSRNOG000000018445   | 708.20   | 410.01   | 1006.39  | 2.45 | 1.30   | 2.53E-30 | 3.25E-28      | Agt                                                            | angiotensinogen (serpin peptidase inhibitor, clade A, member 8) [Source:RGD Symbol;Acc:2069] | 2     |
| ENSRNOG000000018346   | 107.50   | 132.18   | 82.83    | 0.63 | -0.67  | 0.000699 | 0.006350763   | Agtr1a                                                         | angiotensin II receptor, type 1a [Source:RGD Symbol;Acc:2070]                                | 7     |
| ENSRNOG000000010640   | 10.57    | 12.08    | 9.06     | 0.75 | -0.41  | 0.418908 | 0.739278588   | Agtr1b                                                         | angiotensin II receptor, type 1b [Source:RGD Symbol;Acc:2071]                                | 1     |
| ENSRNOG000000050006   | 9.43     | 17.68    | 1.18     | 0.07 | -3.90  | 1.15E-10 | 4.44E-09      | Agtr2                                                          | angiotensin II receptor, type 2 [Source:RGD Symbol;Acc:2072]                                 | 2     |
| ENSRNOG000000014721   | 25.99    | 26.36    | 25.63    | 0.97 | -0.04  | 0.841829 | 1             | Ahrr                                                           | aryl-hydrocarbon receptor repressor [Source:RGD Symbol;Acc:1559857]                          | 3     |
| ENSRNOG000000001213   | 0.12     | 0.24     | 0.00     | 0.00 | #NAME? | 0.964517 | 1             | Aire                                                           | autoimmune regulator [Source:RGD Symbol;Acc:1311139]                                         | 3     |
| ENSRNOG000000004578</ |          |          |          |      |        |          |               |                                                                |                                                                                              |       |

|                      |           |           |          |       |       |          |              |          |                                                                                                                         |   |
|----------------------|-----------|-----------|----------|-------|-------|----------|--------------|----------|-------------------------------------------------------------------------------------------------------------------------|---|
| ENSRNOG00000000167   | 388.01    | 694.45    | 81.57    | 0.12  | -3.09 | 4.59E-93 | 2.47E-90     | Alas2    | aminolevulinata, delta-, synthase 2 [Source:RGD Symbol;Acc:2084]                                                        | 2 |
| ENSRNOG000000008683  | 566.96    | 544.03    | 589.90   | 1.08  | 0.12  | 0.337976 | 0.652067319  | Ak1      | anaplastic lymphoma receptor tyrosine kinase [Source:RGD Symbol;Acc:628622]                                             | 2 |
| ENSRNOG000000027037  | 89.23     | 127.19    | 51.27    | 0.40  | -1.31 | 3.98E-09 | 1.25E-07     | Alox12   | arachidonate 12-lipoxygenase [Source:RGD Symbol;Acc:1311159]                                                            | 1 |
| ENSRNOG000000012972  | 62.16     | 95.97     | 28.36    | 0.30  | -1.76 | 3.30E-12 | 1.46E-10     | Alox5    | arachidonate 5-lipoxygenase [Source:RGD Symbol;Acc:2096]                                                                | 1 |
| ENSRNOG000000007984  | 302.02    | 255.46    | 348.58   | 1.36  | 0.45  | 0.001264 | 0.010262799  | Amer1    | APC membrane recruitment protein 1 [Source:RGD Symbol;Acc:1560322]                                                      | 2 |
| ENSRNOG000000022166  | 11.26     | 12.28     | 10.23    | 0.83  | -0.26 | 0.632085 | 0.90185806   | Ammecr1  | Alport syndrome, mental retardation, midface hypoplasia and elliptocytosis chromosomal region gene 1                    | 2 |
| ENSRNOG000000003776  | 1.20      | 1.40      | 1.01     | 0.72  | -0.47 | 0.919341 |              | Amtn     | amelotin [Source:RGD Symbol;Acc:1592356]                                                                                | 2 |
| ENSRNOG0000000036686 | 1847.97   | 1946.04   | 1749.90  | 0.90  | -0.15 | 0.071272 | 0.238407975  | Anap11   | anaphase promoting complex subunit 11 [Source:RGD Symbol;Acc:1561880]                                                   | 2 |
| ENSRNOG000000043032  | 13.30     | 14.96     | 11.64    | 0.78  | -0.36 | 0.377518 | 0.693419285  | Ang      | angiogenin, ribonuclease, RNase A family, 5 [Source:RGD Symbol;Acc:1594539]                                             | 3 |
| ENSRNOG000000020411  | 4805.13   | 4181.18   | 5429.08  | 1.30  | 0.38  | 7.25E-07 | 1.48E-05     | Ank3     | ankyrin 3, node of Ranvier (ankyrin G) [Source:RGD Symbol;Acc:620157]                                                   | 2 |
| ENSRNOG000000016622  | 200.30    | 197.11    | 203.50   | 1.03  | 0.05  | 0.853906 |              | Ank2     | ankyrin repeat, family A (RFXANK-like), 2 [Source:RGD Symbol;Acc:1303108]                                               | 2 |
| ENSRNOG000000013618  | 832.57    | 909.58    | 755.55   | 0.83  | -0.27 | 0.010645 | 0.057541054  | Ankrd10  | ankyrin repeat domain 10 [Source:RGD Symbol;Acc:1310501]                                                                | 2 |
| ENSRNOG000000012733  | 1268.30   | 1167.83   | 1368.77  | 1.17  | 0.23  | 0.014472 | 0.072976038  | Ankrd12  | ankyrin repeat domain 12 [Source:RGD Symbol;Acc:1310118]                                                                | 2 |
| ENSRNOG000000014742  | 1237.98   | 1294.31   | 1181.65  | 0.91  | -0.13 | 0.175058 | 0.439253173  | Ankrd13b | ankyrin repeat domain 13B [Source:RGD Symbol;Acc:1564005]                                                               | 2 |
| ENSRNOG000000028247  | 2483.68   | 2567.49   | 2399.86  | 0.93  | -0.10 | 0.244632 | 0.538949053  | Ankrd13d | ankyrin repeat domain 13 family, member D [Source:RGD Symbol;Acc:1309156]                                               | 2 |
| ENSRNOG000000006759  | 183.55    | 178.25    | 188.84   | 1.06  | 0.08  | 0.580662 | 0.863202321  | Ankrd24  | ankyrin repeat domain 24 [Source:RGD Symbol;Acc:1311385]                                                                | 2 |
| ENSRNOG000000007110  | 675.02    | 616.81    | 733.23   | 1.19  | 0.25  | 0.025136 | 0.11195299   | Ankrd6   | ankyrin repeat domain 6 [Source:RGD Symbol;Acc:1583731]                                                                 | 2 |
| ENSRNOG000000024870  | 323.83    | 268.54    | 379.11   | 1.41  | 0.50  | 0.00054  | 0.005114007  | Anks1b   | ankyrin repeat and sterile alpha motif domain containing 1B [Source:RGD Symbol;Acc:1565556]                             | 5 |
| ENSRNOG000000023309  | 545.93    | 544.66    | 547.20   | 1.00  | 0.01  | 0.94433  |              | Anks6    | ankyrin repeat and sterile alpha motif domain containing 6 [Source:RGD Symbol;Acc:3334]                                 | 2 |
| ENSRNOG000000019052  | 1437.02   | 1532.24   | 1341.79  | 0.88  | -0.19 | 0.037905 | 0.151441409  | Ankzf1   | ankyrin repeat and zinc finger domain containing 1 [Source:RGD Symbol;Acc:1359242]                                      | 2 |
| ENSRNOG000000020865  | 455.45    | 486.53    | 424.37   | 0.87  | -0.20 | 0.162321 | 0.417968407  | Ano1     | anoctamin 1, calcium activated chloride channel [Source:RGD Symbol;Acc:1310786]                                         | 1 |
| ENSRNOG000000004731  | 1836.83   | 1237.92   | 2435.73  | 1.97  | 0.98  | 6.45E-30 | 8.12E-28     | Ano3     | anoctamin 3 [Source:RGD Symbol;Acc:1308873]                                                                             | 5 |
| ENSRNOG000000017469  | 1132.94   | 1461.25   | 804.63   | 0.55  | -0.86 | 1.91E-19 | 1.43E-17     | Anxa1    | annexin A1 [Source:RGD Symbol;Acc:2118]                                                                                 | 1 |
| ENSRNOG000000010984  | 5125.10   | 5364.68   | 4885.53  | 0.91  | -0.13 | 0.084555 | 0.269319591  | Anxa11   | annexin A11 [Source:RGD Symbol;Acc:1309911]                                                                             | 5 |
| ENSRNOG000000010362  | 31361.93  | 30333.06  | 32390.79 | 1.07  | 0.09  | 0.277314 | 0.582503478  | Anxa2    | annexin A2 [Source:RGD Symbol;Acc:621170]                                                                               | 1 |
| ENSRNOG000000014453  | 43840.44  | 43662.08  | 44018.79 | 1.01  | 0.01  | 0.927508 |              | Anxa5    | annexin A5 [Source:RGD Symbol;Acc:2120]                                                                                 | 5 |
| ENSRNOG000000024492  | 2575.14   | 2281.03   | 2869.25  | 1.26  | 0.33  | 5.95E-05 | 0.000770851  | Ap1ar    | adaptor-related protein complex 1 associated regulatory protein [Source:RGD Symbol;Acc:1311435]                         | 2 |
| ENSRNOG000000010624  | 2010.06   | 1850.21   | 2169.91  | 1.17  | 0.23  | 0.006838 | 0.040699573  | Ap3b1    | adaptor-related protein complex 3, beta 1 subunit [Source:RGD Symbol;Acc:1310256]                                       | 2 |
| ENSRNOG000000001353  | 383.33    | 416.77    | 349.89   | 0.84  | -0.25 | 0.06344  | 0.220187086  | Ap4m1    | adaptor-related protein complex 4, mu 1 subunit [Source:RGD Symbol;Acc:1310233]                                         | 2 |
| ENSRNOG000000014928  | 4587.39   | 3911.22   | 5263.56  | 1.35  | 0.43  | 1.30E-08 | 3.67E-07     | Apba1    | amyloid beta (A4) precursor protein-binding, family A, member 1 [Source:RGD Symbol;Acc:620844]                          | 2 |
| ENSRNOG000000005542  | 23.29     | 16.99     | 29.59    | 1.74  | 0.80  | 0.025825 | 0.114246354  | Apob     | apolipoprotein B [Source:RGD Symbol;Acc:2129]                                                                           | 5 |
| ENSRNOG000000018454  | 209263.33 | 215598.24 | #####    | 0.94  | -0.09 | 0.492928 | 0.797735523  | Apoe     | apolipoprotein E [Source:RGD Symbol;Acc:2138]                                                                           | 1 |
| ENSRNOG000000023122  | 17.90     | 29.91     | 5.89     | 0.20  | -2.34 | 3.89E-09 | 1.22E-07     | Apo11a   | apolipoprotein L 11a [Source:RGD Symbol;Acc:1309798]                                                                    | 2 |
| ENSRNOG000000006997  | 34285.55  | 33689.18  | 34881.92 | 1.04  | 0.05  | 0.53645  | 0.83315454   | App      | amyloid beta (A4) precursor protein [Source:RGD Symbol;Acc:2139]                                                        | 1 |
| ENSRNOG000000008174  | 1517.79   | 1440.28   | 1595.29  | 1.11  | 0.15  | 0.109995 | 0.323717798  | App2     | adaptor protein, phosphotyrosine interaction, PH domain and leucine zipper containing 2 [Source:RGD Symbol;Acc:1310786] | 5 |
| ENSRNOG000000011648  | 4294.05   | 4878.81   | 3709.29  | 0.76  | -0.40 | 0.94E-07 | 1.06E-05     | Aqp4     | aquaporin 1 [Source:RGD Symbol;Acc:2141]                                                                                | 2 |
| ENSRNOG000000016043  | 1140.15   | 78.70     | 2201.59  | 27.98 | 4.81  | 0        |              | Aqp4     | aquaporin 4 [Source:RGD Symbol;Acc:2143]                                                                                | 1 |
| ENSRNOG000000019555  | 2129.59   | 2476.91   | 1782.26  | 0.72  | -0.47 | 1.97E-08 | 5.38E-07     | Arap1    | ArfGAP with RhoGAP domain, ankyrin repeat and PH domain 1 [Source:RGD Symbol;Acc:1310385]                               | 2 |
| ENSRNOG0000000046472 | 1918.29   | 1954.75   | 1881.83  | 0.96  | -0.05 | 0.510776 | 0.811910972  | Arfgap3  | ADP-ribosylation factor GTPase activating protein 3 [Source:RGD Symbol;Acc:1560066]                                     | 2 |
| ENSRNOG000000024142  | 2059.94   | 2164.31   | 1955.57  | 0.90  | -0.15 | 0.075901 | 0.24946578   | Arglu1   | arginine and glutamate rich 1 [Source:RGD Symbol;Acc:1310061]                                                           | 2 |
| ENSRNOG000000013836  | 1384.12   | 1377.24   | 1390.99  | 1.01  | 0.01  | 0.882748 |              | Arhgap17 | Rho GTPase activating protein 17 [Source:RGD Symbol;Acc:628767]                                                         | 2 |
| ENSRNOG000000008659  | 2176.27   | 1908.93   | 2443.60  | 1.28  | 0.36  | 1.69E-05 | 0.000250593  | Arhgap21 | Rho GTPase activating protein 21 [Source:RGD Symbol;Acc:1311028]                                                        | 2 |
| ENSRNOG000000024728  | 1346.06   | 1365.26   | 1326.86  | 0.97  | -0.04 | 0.657665 | 0.921449365  | Arhgap22 | Rho GTPase activating protein 22 [Source:RGD Symbol;Acc:1307237]                                                        | 2 |
| ENSRNOG000000013920  | 125.54    | 109.43    | 141.65   | 1.29  | 0.37  | 0.059481 | 0.210260243  | Arhgap26 | Rho GTPase activating protein 26 [Source:RGD Symbol;Acc:1310923]                                                        | 5 |
| ENSRNOG000000017065  | 1629.97   | 1277.23   | 1982.71  | 1.55  | 0.63  | 3.88E-13 | 1.91E-11     | Arhgap28 | Rho GTPase activating protein 28 [Source:RGD Symbol;Acc:1559882]                                                        | 5 |
| ENSRNOG000000024677  | 371.27    | 379.41    | 363.13   | 0.96  | -0.06 | 0.688749 | 0.943449877  | Arhgap33 | Rho GTPase activating protein 33 [Source:RGD Symbol;Acc:2318374]                                                        | 2 |
| ENSRNOG000000016566  | 2565.90   | 2666.00   | 2465.80  | 0.92  | -0.11 | 0.18111  | 0.448761812  | Arhgap39 | Rho GTPase activating protein 39 [Source:RGD Symbol;Acc:1593158]                                                        | 2 |
| ENSRNOG000000020130  | 2170.46   | 2444.53   | 1896.40  | 0.78  | -0.37 | 1.15E-05 | 0.000176937  | Arhgef1  | Rho guanine nucleotide exchange factor (GEF) 1 [Source:RGD Symbol;Acc:620951]                                           | 2 |
| ENSRNOG000000028090  | 1236.23   | 1189.51   | 1282.96  | 1.08  | -0.11 | 0.213521 | 0.497840296  | Arhgef18 | rho/rac guanine nucleotide exchange factor (GEF) 18 [Source:RGD Symbol;Acc:1311448]                                     | 2 |
| ENSRNOG000000016544  | 1436.75   | 1447.12   | 1426.38  | 0.99  | -0.02 | 0.851956 |              | Arhgef28 | Rho guanine nucleotide exchange factor (GEF) 28 [Source:RGD Symbol;Acc:1307061]                                         | 2 |
| ENSRNOG000000021433  | 162.88    | 167.09    | 158.66   | 0.95  | -0.07 | 0.668602 | 0.929033555  | Arhgef39 | Rho guanine nucleotide exchange factor (GEF) 39 [Source:RGD Symbol;Acc:1310376]                                         | 2 |
| ENSRNOG000000019677  | 190.85    | 199.14    | 182.56   | 0.92  | -0.13 | 0.420708 | 0.740766435  | Arid3b   | AT rich interactive domain 3B (Bright like) [Source:RGD Symbol;Acc:1306335]                                             | 2 |
| ENSRNOG000000015382  | 238.24    | 264.73    | 211.74   | 0.80  | -0.32 | 0.039512 | 0.155868026  | Arid5a   | AT rich interactive domain 5A (Mrf1 like) [Source:RGD Symbol;Acc:1311041]                                               | 2 |
| ENSRNOG000000045948  | 982.43    | 1005.98   | 958.87   | 0.95  | -0.02 | 0.437487 | 0.756676059  | Arl10    | ADP-ribosylation factor-like 10 [Source:RGD Symbol;Acc:1303298]                                                         | 2 |
| ENSRNOG000000020770  | 194.59    | 227.22    | 161.96   | 0.71  | -0.49 | 0.005547 | 0.034537854  | Arl4d    | ADP-ribosylation factor-like 4D [Source:RGD Symbol;Acc:1306875]                                                         | 5 |
| ENSRNOG000000018714  | 181.97    | 152.02    | 211.93   | 1.39  | 0.48  | 0.004295 | 0.027983151  | Arl5b    | ADP-ribosylation factor-like 5B [Source:RGD Symbol;Acc:1305569]                                                         | 1 |
| ENSRNOG000000043128  | 1004.33   | 998.59    | 1010.06  | 1.01  | 0.02  | 0.884343 |              | Armc4    | armadillo repeat containing, X-linked 4 [Source:MGJ Symbol;Acc:MGJ:2147887]                                             | 2 |
| ENSRNOG000000037707  | 411.02    | 441.69    | 380.35   | 0.86  | -0.22 | 0.099639 | 0.301773706  | Armc6    | armadillo repeat containing, X-linked 6 [Source:RGD Symbol;Acc:1359303]                                                 | 2 |
| ENSRNOG0000000001830 | 16.98     | 9.34      | 24.61    | 2.63  | 1.40  | 0.000312 | 0.003221778  | Arnt     | aryl hydrocarbon receptor nuclear translocator-like 2 [Source:RGD Symbol;Acc:620230]                                    | 2 |
| ENSRNOG000000000991  | 2922.86   | 3321.98   | 2523.73  | 0.76  | -0.40 | 6.84E-07 | 1.41E-05     | Arpc1b   | actin related protein 2/3 complex, subunit 1B [Source:RGD Symbol;Acc:2155]                                              | 2 |
| ENSRNOG000000028062  | 4998.69   | 4897.99   | 5099.39  | 1.04  | 0.06  | 0.489316 | 0.793581022  | Arpc5    | actin related protein 2/3 complex, subunit 5 [Source:RGD Symbol;Acc:1311791]                                            | 2 |
| ENSRNOG000000030404  | 661.42    | 586.75    | 739.10   | 1.25  | 0.33  | 0.002756 | 0.019567495  | Arrr1    | arrestin, beta 1 [Source:RGD Symbol;Acc:2156]                                                                           | 1 |
| ENSRNOG000000019308  | 922.22    | 964.44    | 880.01   | 0.91  | -0.13 | 0.197405 | 0.474377586  | Arrr2    | arrestin, beta 2 [Source:RGD Symbol;Acc:2157]                                                                           | 1 |
| ENSRNOG000000007622  | 1893.20   | 2003.68   | 1782.73  | 0.89  | -0.17 | 0.047316 | 0.17756936   | Arrrd1   | arrestin domain containing 1 [Source:RGD Symbol;Acc:1309961]                                                            | 2 |
| ENSRNOG000000019009  | 704.75    | 819.70    | 589.79   | 0.72  | -0.47 | 2.21E-05 | 0.0003318926 | Arrrd2   | arrestin domain containing 2 [Source:RGD Symbol;Acc:1309659]                                                            | 2 |
| ENSRNOG000000019842  | 17.74     | 22.78     | 12.69    | 0.56  | -0.84 | 0.024955 | 0.111451289  | Artn     | artemin [Source:RGD Symbol;Acc:621427]                                                                                  | 1 |
| ENSRNOG000000031493  | 50.24     | 51.64     | 48.84    | 0.95  | -0.08 | 0.743479 | 0.977510678  | Ascl4    | achaete-scute family bHLH transcription factor 4 [Source:RGD Symbol;Acc:1307533]                                        | 3 |
| ENSRNOG000000005115  | 29.73     | 34.38     | 25.08    | 0.73  | -0.46 | 0.152262 | 0.402276476  | Asf1b    | anti-silencing function 1B histone chaperone [Source:RGD Symbol;Acc:1304918]                                            | 2 |
| ENSRNOG000000018789  | 9400.06   | 9168.90   | 9631.21  | 1.05  | 0.07  | 0.331329 | 0.644270512  | Asic1    | acid-sensing (proton-gated) ion channel 1 [Source:RGD Symbol;Acc:17062]                                                 | 1 |
| ENSRNOG000000007019  | 315.14    | 306.90    | 323.37   | 1.05  | 0.08  | 0.552294 | 0.838350771  | Asic2    | acid-sensing (proton-gated) ion channel 2 [Source:RGD Symbol;Acc:2017]                                                  | 6 |
| ENSRNOG000000008380  | 10241.76  | 10176.46  | 10307.06 | 1.01  | 0.02  | 0.779313 | 0.998033954  | Asic3    | acid-sensing (proton-gated) ion channel 3 [Source:RGD Symbol;Acc:708578]                                                | 1 |
| ENSRNOG000000009093  | 1436.33   | 1499.79   | 1372.87  | 0.92  | -0.13 | 0.139124 | 0.37766537   | Asl      | argininosuccinate lyase [Source:RGD Symbol;Acc:619974]                                                                  | 2 |
| ENSRNOG000000008837  | 1147.56   | 1119.52   | 1175.61  | 1.05  | 0.07  | 0.512406 | 0.813076113  | Ass1     | argininosuccinate synthase 1 [Source:RGD Symbol;Acc:2163]                                                               | 5 |
| ENSRNOG00000001808   | 554.82    | 561.72    | 547.92   | 0.98  | -0.04 | 0.714536 | 0.958583104  | Asun     | asunder, spermatogenesis regulator [Source:RGD Symbol;Acc:1592236]                                                      | 2 |
| ENSRNOG000000005036  | 373.48    | 332.48    | 414.48   | 1.25  | 0.32  | 0.022182 | 0.101657304  | Atad2b   | ATPase family, AAA domain containing 2B [Source:RGD Symbol;Acc:1566199]                                                 | 2 |
| ENSRNOG000000021903  | 116.26    | 111.79    | 120.72   | 1.08  | 0.11  | 0.546508 | 0.833646025  | Atad5    | ATPase family, AAA domain containing 5 [Source:RGD Symbol;Acc:1561464]                                                  |   |

|                      |          |          |          |      |       |          |             |          |                                                                                                     |   |
|----------------------|----------|----------|----------|------|-------|----------|-------------|----------|-----------------------------------------------------------------------------------------------------|---|
| ENSRNOG000000048522  | 1.97     | 2.09     | 1.85     | 0.89 | -0.18 | 1        | 1           | Avpr1b   | arginine vasopressin receptor 1B [Source:RGD Symbol;Acc:61886]                                      | 1 |
| ENSRNOG000000037270  | 13.53    | 9.31     | 17.75    | 1.91 | 0.93  | 0.021191 | 0.098274171 | Avpr2    | arginine vasopressin receptor 2 [Source:RGD Symbol;Acc:2186]                                        | 1 |
| ENSRNOG000000009267  | 1468.81  | 1375.76  | 1561.86  | 1.14 | 0.18  | 0.048045 | 0.179588725 | B3gnt2   | UDP-GlcNAc:betaGal beta-1,3-N-acetylglucosaminyltransferase 2 [Source:RGD Symbol;Acc:1310077]       | 3 |
| ENSRNOG000000008283  | 1738.13  | 1708.49  | 1767.77  | 1.03 | 0.05  | 0.051247 | 0.837379337 | B4gal5   | UDP-Gal:betaGlcNAc beta 1,4-galactosyltransferase, polypeptide 5 [Source:RGD Symbol;Acc:1310062]    | 2 |
| ENSRNOG000000006170  | 81.41    | 67.22    | 95.60    | 1.42 | 0.51  | 0.015954 | 0.078989219 | Bach2    | BTB and CNC homology 1, basic leucine zipper transcription factor 2 [Source:RGD Symbol;Acc:1562865] | 2 |
| ENSRNOG000000021147  | 1292.37  | 1328.56  | 1256.19  | 0.95 | -0.08 | 0.374527 | 0.690762511 | Bad      | BCL2-associated agonist of cell death [Source:RGD Symbol;Acc:620103]                                | 3 |
| ENSRNOG000000008277  | 3031.42  | 3008.18  | 3054.66  | 1.02 | 0.02  | 0.804828 |             | Bag1     | BCL2-associated athanogene [Source:RGD Symbol;Acc:1305203]                                          | 2 |
| ENSRNOG000000012709  | 310.68   | 302.66   | 318.70   | 1.05 | 0.07  | 0.628256 | 0.898999742 | Bag2     | Bcl2-associated athanogene 2 [Source:RGD Symbol;Acc:1585173]                                        | 5 |
| ENSRNOG000000010428  | 735.06   | 743.57   | 726.55   | 0.98 | -0.03 | 0.800623 |             | Bahd1    | bromo adjacent homology domain containing 1 [Source:RGD Symbol;Acc:1563127]                         | 1 |
| ENSRNOG000000012215  | 38.05    | 37.29    | 38.81    | 1.04 | 0.06  | 0.841955 |             | Baiap2l2 | BAI1-associated protein 2-like 2 [Source:RGD Symbol;Acc:1595091]                                    | 5 |
| ENSRNOG000000016066  | 401.77   | 392.15   | 411.40   | 1.05 | 0.07  | 0.699104 | 0.94767667  | Bambi    | BMP and activin membrane-bound inhibitor [Source:RGD Symbol;Acc:621831]                             | 1 |
| ENSRNOG000000019140  | 1010.29  | 931.80   | 1088.78  | 1.17 | 0.22  | 0.020755 | 0.096701141 | Banp     | Btg3 associated nuclear protein [Source:RGD Symbol;Acc:1307464]                                     | 2 |
| ENSRNOG000000020876  | 723.57   | 790.38   | 656.76   | 0.83 | -0.27 | 0.014869 | 0.074637342 | Bax      | Bcl2-associated X protein [Source:RGD Symbol;Acc:2192]                                              | 2 |
| ENSRNOG000000006828  | 153.01   | 164.42   | 141.60   | 0.86 | -0.22 | 0.2529   | 0.550357561 | Baz1a    | bromodomain adjacent to zinc finger domain, 1A [Source:RGD Symbol;Acc:1306199]                      | 2 |
| ENSRNOG0000000048217 | 153.47   | 178.67   | 128.27   | 0.72 | -0.48 | 0.009187 | 0.051582328 | Bbc3     | Bcl-2 binding component 3 [Source:RGD Symbol;Acc:631434]                                            | 2 |
| ENSRNOG000000026171  | 1301.28  | 1282.69  | 1319.88  | 1.03 | 0.04  | 0.652623 | 0.917568787 | Bbs4     | Bardet-Biedl syndrome 4 [Source:RGD Symbol;Acc:1309134]                                             | 1 |
| ENSRNOG000000007127  | 292.00   | 279.06   | 304.94   | 1.09 | 0.13  | 0.454549 | 0.77095117  | Bbs5     | Bardet-Biedl syndrome 5 [Source:RGD Symbol;Acc:1310718]                                             | 2 |
| ENSRNOG000000015189  | 488.48   | 484.66   | 492.31   | 1.02 | 0.02  | 0.863991 |             | Bbs9     | Bardet-Biedl syndrome 9 [Source:RGD Symbol;Acc:1308472]                                             | 2 |
| ENSRNOG000000020956  | 2305.39  | 2498.84  | 2111.95  | 0.85 | -0.24 | 0.00367  | 0.024612766 | Bcat2    | branched chain amino acid transaminase 2, mitochondrial [Source:RGD Symbol;Acc:68948]               | 2 |
| ENSRNOG000000007049  | 81.26    | 79.55    | 82.97    | 1.04 | 0.06  | 0.759811 | 0.987007509 | Bcl11a   | B-cell CLL/lymphoma 11A (zinc finger protein) [Source:RGD Symbol;Acc:1309923]                       | 3 |
| ENSRNOG000000028632  | 4.56     | 5.45     | 3.67     | 0.67 | -0.57 | 0.391619 | 0.708973988 | Bcl2l14  | Bcl2-like 14 (apoptosis facilitator) [Source:RGD Symbol;Acc:1562777]                                | 5 |
| ENSRNOG000000043416  | 275.94   | 292.25   | 259.62   | 0.89 | -0.17 | 0.266592 | 0.568213558 | Bcl3     | B-cell CLL/lymphoma 3 [Source:RGD Symbol;Acc:1589465]                                               | 2 |
| ENSRNOG000000004488  | 1.84     | 2.77     | 0.91     | 0.33 | -1.61 | 0.131323 | 0.362484496 | Bdkrb1   | bradykinin receptor B1 [Source:RGD Symbol;Acc:620401]                                               | 1 |
| ENSRNOG000000047300  | 177.98   | 156.17   | 199.79   | 1.28 | 0.36  | 0.031417 | 0.131640175 | Bdkrb2   | bradykinin receptor B2 [Source:RGD Symbol;Acc:2201]                                                 | 1 |
| ENSRNOG000000047466  | 626.10   | 488.66   | 763.54   | 1.56 | 0.64  | 6.35E-08 | 1.57E-06    | Bdnf     | brain-derived neurotrophic factor [Source:RGD Symbol;Acc:2202]                                      | 6 |
| ENSRNOG000000032019  | 28.70    | 22.41    | 34.98    | 1.56 | 0.64  | 0.036545 | 0.147401975 | Bend4    | BEN domain containing 4 [Source:RGD Symbol;Acc:1307318]                                             | 2 |
| ENSRNOG000000013165  | 1015.20  | 1072.74  | 957.65   | 0.89 | -0.16 | 0.094446 | 0.291418556 | Bet1l    | Bet1 golgi vesicular membrane trafficking protein-like [Source:RGD Symbol;Acc:71051]                | 2 |
| ENSRNOG000000032729  | 4252.27  | 4163.20  | 4341.35  | 1.04 | 0.06  | 0.485737 | 0.790276032 | Bex2     | brain expressed X-linked 2 [Source:RGD Symbol;Acc:1564466]                                          | 2 |
| ENSRNOG000000028608  | 164.10   | 165.18   | 163.02   | 0.99 | -0.02 | 0.886077 |             | Bex4     | brain expressed, X-linked 4 [Source:RGD Symbol;Acc:1564479]                                         | 5 |
| ENSRNOG000000022232  | 79.85    | 76.11    | 83.60    | 1.10 | 0.14  | 0.58142  | 0.863544806 | Bhlh9    | basic helix-loop-helix family, member a9 [Source:RGD Symbol;Acc:1311234]                            | 1 |
| ENSRNOG000000021745  | 19.14    | 25.20    | 13.09    | 0.52 | -0.94 | 0.007943 | 0.045835421 | Bhlhe22  | basic helix-loop-helix family, member e22 [Source:RGD Symbol;Acc:1305451]                           | 5 |
| ENSRNOG000000010312  | 0.13     | 0.00     | 0.27     | Inf  | Inf   | 1        |             | Bhlhe23  | basic helix-loop-helix family, member e23 [Source:RGD Symbol;Acc:1559760]                           | 3 |
| ENSRNOG000000048961  | 497.20   | 463.83   | 530.58   | 1.14 | 0.19  | 0.122832 | 0.346367889 | Bhlhe41  | basic helix-loop-helix family, member e41 [Source:RGD Symbol;Acc:70900]                             | 2 |
| ENSRNOG000000012439  | 1471.02  | 1374.80  | 1567.24  | 1.14 | 0.19  | 0.040383 | 0.15847476  | Bid      | BH3 interacting domain death agonist [Source:RGD Symbol;Acc:620160]                                 | 5 |
| ENSRNOG000000050819  | 98.26    | 111.61   | 84.91    | 0.76 | -0.39 | 0.063211 | 0.219677728 | Birc5    | baculoviral IAP repeat-containing 5 [Source:RGD Symbol;Acc:70499]                                   | 2 |
| ENSRNOG000000037160  | 719.08   | 668.52   | 769.63   | 1.15 | 0.20  | 0.06769  | 0.229884814 | Bloc1s6  | biogenesis of lysosomal organelles complex-1, subunit 6, pallidin [Source:RGD Symbol;Acc:1310208]   | 1 |
| ENSRNOG000000024410  | 909.75   | 925.71   | 893.79   | 0.97 | -0.05 | 0.661125 | 0.923921811 | Blnrb    | biliverdin reductase B (flavin reductase (NADPH)) [Source:RGD Symbol;Acc:1306080]                   | 2 |
| ENSRNOG000000002984  | 13.13    | 15.71    | 10.56    | 0.67 | -0.57 | 0.130702 | 0.361434753 | Bmp15    | bone morphogenetic protein 15 [Source:RGD Symbol;Acc:70990]                                         | 3 |
| ENSRNOG000000030155  | 4.14     | 5.40     | 2.87     | 0.53 | -0.91 | 0.186324 | 0.457422413 | Bmp8a    | bone morphogenetic protein 8a [Source:RGD Symbol;Acc:1585858]                                       | 3 |
| ENSRNOG000000019770  | 11.49    | 7.99     | 14.99    | 1.88 | 0.91  | 0.037313 | 0.149723704 | Bnc1     | basonuclin 1 [Source:RGD Symbol;Acc:1309042]                                                        | 3 |
| ENSRNOG000000010790  | 553.86   | 556.77   | 550.94   | 0.99 | -0.02 | 0.873296 |             | Bnip2    | BCL2/adenovirus E1B interacting protein 2 [Source:RGD Symbol;Acc:1308944]                           | 2 |
| ENSRNOG000000002041  | 749.12   | 950.59   | 547.66   | 0.58 | -0.80 | 5.96E-13 | 2.88E-11    | Boc      | BOC cell adhesion associated, oncogene regulated [Source:RGD Symbol;Acc:1304550]                    | 2 |
| ENSRNOG000000018214  | 1714.75  | 1770.63  | 1658.87  | 0.94 | -0.09 | 0.262772 | 0.569432467 | Bok      | BCL2-related ovarian killer [Source:RGD Symbol;Acc:70984]                                           | 2 |
| ENSRNOG000000010133  | 2379.61  | 2503.37  | 2255.86  | 0.90 | -0.15 | 0.061669 | 0.216103036 | Bpgm     | 2,3-bisphosphoglycerate mutase [Source:RGD Symbol;Acc:735018]                                       | 2 |
| ENSRNOG000000046497  | 1713.08  | 1767.05  | 1659.11  | 0.94 | -0.09 | 0.347892 | 0.664310515 | Brap     | BRCA1 associated protein [Source:RGD Symbol;Acc:1586551]                                            | 2 |
| ENSRNOG000000020701  | 113.83   | 115.61   | 112.06   | 0.97 | -0.05 | 0.811699 |             | Brcal    | breast cancer 1, early onset [Source:RGD Symbol;Acc:2218]                                           | 2 |
| ENSRNOG000000015676  | 1910.10  | 1962.92  | 1857.28  | 0.95 | -0.08 | 0.334244 | 0.647541313 | Brd9     | bromodomain containing 9 [Source:RGD Symbol;Acc:1307359]                                            | 2 |
| ENSRNOG000000020703  | 1.69     | 2.20     | 1.19     | 0.54 | -0.88 | 0.540711 | 0.83315454  | Brdt     | bromodomain, testis-specific [Source:RGD Symbol;Acc:1306678]                                        | 2 |
| ENSRNOG00000001009   | 905.66   | 985.72   | 825.59   | 0.84 | -0.26 | 0.013127 | 0.067648955 | Bri3     | brain protein 13 [Source:RGD Symbol;Acc:1309187]                                                    | 2 |
| ENSRNOG000000005592  | 1037.15  | 917.80   | 1156.50  | 1.26 | 0.33  | 0.00076  | 0.006797579 | Bripn2   | bone morphogenetic protein/retinoic acid inducible neural-specific 2 [Source:RGD Symbol;Acc:708419] | 2 |
| ENSRNOG000000028641  | 192.96   | 196.81   | 189.11   | 0.96 | -0.06 | 0.804486 |             | Bripf3   | bromodomain and PHD finger containing, 3 [Source:RGD Symbol;Acc:1306868]                            | 2 |
| ENSRNOG000000023370  | 662.65   | 769.69   | 555.62   | 0.72 | -0.47 | 2.27E-05 | 0.000327621 | Bst2     | bone marrow stromal cell antigen 2 [Source:RGD Symbol;Acc:727849]                                   | 2 |
| ENSRNOG000000042163  | 184.02   | 204.50   | 163.53   | 0.80 | -0.32 | 0.055276 | 0.19945387  | Btdb19   | BTB (POZ) domain containing 19 [Source:RGD Symbol;Acc:2320259]                                      | 2 |
| ENSRNOG000000002728  | 25.99    | 24.49    | 27.50    | 1.12 | 0.17  | 0.586095 | 0.866721217 | Btc      | betacellulin [Source:RGD Symbol;Acc:620275]                                                         | 3 |
| ENSRNOG000000016912  | 1297.05  | 1306.80  | 1287.29  | 0.99 | -0.02 | 0.730786 | 0.969208326 | Btf3     | basic transcription factor 3 [Source:RGD Symbol;Acc:1308095]                                        | 2 |
| ENSRNOG000000033000  | 296.23   | 363.90   | 228.55   | 0.63 | -0.67 | 5.18E-06 | 8.64E-05    | Btg2     | BTG family, member 2 [Source:RGD Symbol;Acc:2225]                                                   | 4 |
| ENSRNOG00000001555   | 517.11   | 505.20   | 529.03   | 1.05 | 0.07  | 0.648523 | 0.914614398 | Btg3     | BTG family, member 3 [Source:RGD Symbol;Acc:2226]                                                   | 3 |
| ENSRNOG000000032778  | 109.85   | 125.68   | 94.01    | 0.75 | -0.42 | 0.039938 | 0.157112211 | Bub1     | BUB1 mitotic checkpoint serine/threonine kinase [Source:RGD Symbol;Acc:1311707]                     | 2 |
| ENSRNOG000000007906  | 26.96    | 40.79    | 13.14    | 0.32 | -1.63 | 6.34E-07 | 1.32E-05    | Bub1b    | BUB1 mitotic checkpoint serine/threonine kinase B [Source:RGD Symbol;Acc:619791]                    | 2 |
| ENSRNOG000000043199  | 163.71   | 150.12   | 177.29   | 1.18 | 0.24  | 0.193139 | 0.467706823 | Bves     | blood vessel epidermal substance [Source:RGD Symbol;Acc:1561100]                                    | 3 |
| ENSRNOG000000002316  | 45.74    | 51.63    | 39.85    | 0.77 | -0.37 | 0.184911 | 0.454732439 | C1ql4    | complement component 1, q subcomponent-like 4 [Source:RGD Symbol;Acc:1565968]                       | 5 |
| ENSRNOG000000005094  | 14.97    | 23.22    | 6.72     | 0.29 | -1.79 | 1.73E-05 | 0.00025472  | C1qtnf7  | C1q and tumor necrosis factor related protein 7 [Source:RGD Symbol;Acc:1306978]                     | 3 |
| ENSRNOG000000014382  | 2348.44  | 2248.42  | 2448.45  | 1.09 | 0.12  | 0.140399 | 0.379659296 | C2cd5    | C2 calcium-dependent domain containing 5 [Source:RGD Symbol;Acc:1304592]                            | 2 |
| ENSRNOG000000047800  | 104.56   | 135.78   | 73.34    | 0.54 | -0.89 | 7.74E-06 | 0.000122874 | C5ar1    | complement component 5a receptor 1 [Source:RGD Symbol;Acc:70553]                                    | 1 |
| ENSRNOG000000014787  | 0.11     | 0.00     | 0.22     | Inf  | Inf   | 1        |             | C1bp5    | calcium binding protein 5 [Source:RGD Symbol;Acc:1308108]                                           | 3 |
| ENSRNOG000000046731  | 3000.57  | 2675.41  | 3325.72  | 1.24 | 0.31  | 5.60E-05 | 0.000730147 | Cacna1a  | calcium channel, voltage-dependent, P/Q type, alpha 1A subunit [Source:EntrezGene;Acc:25398]        | 1 |
| ENSRNOG000000004560  | 3568.69  | 2986.92  | 4150.45  | 1.39 | 0.47  | 1.53E-09 | 5.19E-08    | Cacna1b  | calcium channel, voltage-dependent, N type, alpha 1B subunit [Source:RGD Symbol;Acc:628852]         | 6 |
| ENSRNOG000000007090  | 572.59   | 550.43   | 594.75   | 1.08 | 0.11  | 0.034416 | 0.647579968 | Cacna1c  | calcium channel, voltage-dependent, L type, alpha 1C subunit [Source:RGD Symbol;Acc:2245]           | 5 |
| ENSRNOG000000002863  | 36.44    | 24.12    | 48.75    | 2.02 | 1.01  | 0.000472 | 0.004556098 | Cacna1e  | calcium channel, voltage-dependent, R type, alpha 1E subunit [Source:RGD Symbol;Acc:2246]           | 4 |
| ENSRNOG000000002981  | 213.96   | 268.73   | 159.19   | 0.59 | -0.76 | 6.79E-06 | 0.000109445 | Cacna1g  | calcium channel, voltage-dependent, T type, alpha 1G subunit [Source:RGD Symbol;Acc:68942]          | 1 |
| ENSRNOG000000033893  | 2816.72  | 2641.78  | 2991.65  | 1.13 | 0.18  | 0.025302 | 0.112398071 | Cacna1h  | calcium channel, voltage-dependent, T type, alpha 1H subunit [Source:RGD Symbol;Acc:68943]          | 1 |
| ENSRNOG000000029914  | 145.92   | 109.45   | 182.39   | 1.67 | 0.74  | 6.51E-05 | 0.000832792 | Cacna1i  | calcium channel, voltage-dependent, T type, alpha 1I subunit [Source:RGD Symbol;Acc:68944]          | 5 |
| ENSRNOG000000033531  | 929.16   | 643.24   | 1215.09  | 1.89 | 0.92  | 1.03E-19 | 7.90E-18    | Cacna2d1 | calcium channel, voltage-dependent, alpha2/delta subunit 1 [Source:RGD Symbol;Acc:2247]             | 7 |
| ENSRNOG000000015835  | 1263.41  | 1065.32  | 1461.51  | 1.37 | 0.46  | 4.48E-07 | 9.62E-06    | Cacna2d2 | calcium channel, voltage-dependent, alpha 2/delta subunit 2 [Source:RGD Symbol;Acc:631360]          | 7 |
| ENSRNOG000000031287  | 3297.65  | 3206.31  | 3388.98  | 1.06 | 0.08  | 0.30552  | 0.614547659 | Cacna2d3 | calcium channel, voltage-dependent, alpha2/delta subunit 3 [Source:RGD Symbol;Acc:631361]           | 1 |
| ENSRNOG000000008031  | 38.97    | 33.55    | 44.40    | 1.32 | 0.40  | 0.166982 | 0.42590367  | Cacna2d4 | calcium channel, voltage-dependent, alpha 2/delta subunit 4 [Source:RGD Symbol;Acc:1562038]         | 1 |
| ENSRNOG000000012489  | 12253.57 | 12270.00 | 12237.13 | 1.00 | 0.00  | 0.989928 |             | Cacnb3   | calcium channel, voltage-dependent, beta 3 subunit [Source:RGD Symbol;Acc:2248]                     | 6 |
| ENSRNOG000000006226  | 379.35   | 344.42   | 414.27   | 1.00 | 0.27  | 0.046526 | 0.17539782  | Cacng2   | calcium channel, voltage-dependent, gamma subunit 2 [Source:RGD Symbol;Acc:71095]                   | 1 |
| ENSRNOG000000018778  | 3467.77  | 3253.46  | 3682.08  | 1.13 | 0.18  | 0.02285  | 0.104106101 | Cadml    | cell adhesion molecule 1 [Source:RGD Symbol;Acc:1310999]                                            | 1 |
| ENSRNOG000000007456  | 740.19   | 669.16   | 811.21   | 1.21 | 0.28  | 0.012138 | 0.06366283  | Calb1    | calbindin 1 [Source:RGD Symbol;Acc:69340]                                                           | 5 |
| ENSRNOG000000011130  | 25411.29 | 21733.71 | 29088.87 | 1.34 | 0.42  | 4.01E-07 | 8.64E-06    | Calca    | calcitonin-related polypeptide alpha [Source:RGD Symbol;Acc:2254]                                   | 1 |
| ENSRNOG000000011074  | 3511.27  | 2989.16  | 4033.39  | 1.35 | 0.43  | 1.19E-07 | 2.82E-06    | Calcb    | calcitonin-related polypeptide, beta [Source:RGD Symbol;Acc:620997]                                 | 5 |
| ENSRNOG000000004622  | 198.28   | 202.83   | 193.74   | 0.96 | -0.07 | 0.678542 | 0.936240882 | Calcr    | calcitonin receptor-like [Source:RGD Symbol;Acc:2255]                                               | 1 |
| ENSRNOG000000004060  | 84284.23 | 76541.55 | 90206.90 | 1.20 | 0.27  | 0.007468 | 0.043695793 | Calm2    | calmod                                                                                              |   |

|                      |         |         |         |      |       |          |             |          |                                                                                                               |   |
|----------------------|---------|---------|---------|------|-------|----------|-------------|----------|---------------------------------------------------------------------------------------------------------------|---|
| ENSRNOG00000024277   | 127.12  | 147.41  | 106.82  | 0.72 | -0.46 | 0.011783 | 0.062238272 | Card11   | caspase recruitment domain family, member 11 [Source:RGD Symbol;Acc:2323211]                                  | 5 |
| ENSRNOG00000047367   | 156.48  | 174.13  | 138.84  | 0.80 | -0.33 | 0.069857 | 0.235190477 | Card14   | caspase recruitment domain family, member 14 [Source:RGD Symbol;Acc:1591135]                                  | 2 |
| ENSRNOG00000002610   | 3051.32 | 3105.96 | 2996.69 | 0.96 | -0.05 | 0.467833 | 0.780237584 | Carhsp1  | calcium regulated heat stable protein 1 [Source:RGD Symbol;Acc:708415]                                        | 5 |
| ENSRNOG00000017712   | 46.32   | 55.25   | 37.40   | 0.68 | -0.56 | 0.036112 | 0.146130505 | Cartpt   | CART prepropeptide [Source:RGD Symbol;Acc:2272]                                                               | 3 |
| ENSRNOG00000037304   | 14.96   | 14.58   | 15.34   | 1.05 | 0.07  | 0.967708 | 1           | Casc5    | cancer susceptibility candidate 5 [Source:RGD Symbol;Acc:1307498]                                             | 2 |
| ENSRNOG00000003195   | 6616.91 | 6476.12 | 6757.71 | 1.04 | 0.06  | 0.367175 | 0.683256511 | Caskin1  | CASK interacting protein 1 [Source:RGD Symbol;Acc:620191]                                                     | 7 |
| ENSRNOG00000007372   | 72.83   | 92.50   | 53.15   | 0.57 | -0.80 | 0.000404 | 0.004004803 | Casp1    | caspase 1 [Source:RGD Symbol;Acc:2274]                                                                        | 2 |
| ENSRNOG000000002265  | 141.29  | 105.64  | 176.95  | 1.67 | 0.74  | 5.24E-05 | 0.000689834 | Casr     | calcium-sensing receptor [Source:RGD Symbol;Acc:2277]                                                         | 3 |
| ENSRNOG00000013474   | 924.06  | 876.30  | 971.82  | 1.11 | 0.15  | 0.114627 | 0.332512371 | Cas21    | castor zinc finger 1 [Source:RGD Symbol;Acc:1563533]                                                          | 1 |
| ENSRNOG00000008364   | 4674.63 | 4172.26 | 5177.00 | 1.24 | 0.31  | 4.39E-05 | 0.000588296 | Cat      | catalase [Source:RGD Symbol;Acc:2279]                                                                         | 2 |
| ENSRNOG00000001982   | 345.70  | 300.97  | 390.43  | 1.30 | 0.38  | 0.005647 | 0.034840401 | Cblb     | Cbl proto-oncogene B, E3 ubiquitin protein ligase [Source:RGD Symbol;Acc:620535]                              | 5 |
| ENSRNOG000000000010  | 149.96  | 144.62  | 155.30  | 1.07 | 0.10  | 0.614519 | 0.887248619 | Cbln1    | cerebellin 1 precursor [Source:RGD Symbol;Acc:1562813]                                                        | 2 |
| ENSRNOG000000047848  | 19.36   | 18.75   | 19.97   | 1.07 | 0.09  | 0.821184 | 1           | Cbr1     | carbonyl reductase 1 [Source:RGD Symbol;Acc:2286]                                                             | 2 |
| ENSRNOG00000001701   | 217.28  | 223.39  | 211.17  | 0.95 | -0.08 | 0.614275 | 0.887022943 | Cbr3     | carbonyl reductase 3 [Source:RGD Symbol;Acc:1309728]                                                          | 3 |
| ENSRNOG000000015997  | 190.49  | 194.24  | 186.74  | 0.96 | -0.06 | 0.791038 | 1           | Ccdc106  | coiled-coil domain containing 106 [Source:RGD Symbol;Acc:1566222]                                             | 5 |
| ENSRNOG000000009433  | 384.56  | 373.23  | 395.90  | 1.06 | 0.09  | 0.535655 | 0.83315454  | Ccdc109b | coiled-coil domain containing 109B [Source:RGD Symbol;Acc:1305326]                                            | 2 |
| ENSRNOG000000003559  | 248.07  | 237.67  | 258.48  | 1.09 | 0.12  | 0.424323 | 0.74470919  | Ccdc112  | coiled-coil domain containing 112 [Source:RGD Symbol;Acc:1561942]                                             | 2 |
| ENSRNOG000000020946  | 483.53  | 501.70  | 465.37  | 0.93 | -0.11 | 0.357057 | 0.672307646 | Ccdc12   | coiled-coil domain containing 12 [Source:RGD Symbol;Acc:1306801]                                              | 2 |
| ENSRNOG000000009687  | 202.59  | 216.26  | 188.91  | 0.87 | -0.20 | 0.237965 | 0.530704828 | Ccdc120  | coiled-coil domain containing 120 [Source:RGD Symbol;Acc:1561596]                                             | 2 |
| ENSRNOG000000007262  | 210.11  | 241.97  | 178.24  | 0.74 | -0.44 | 0.007348 | 0.043145101 | Ccdc134  | coiled-coil domain containing 134 [Source:RGD Symbol;Acc:1559657]                                             | 2 |
| ENSRNOG000000028581  | 112.54  | 124.64  | 100.44  | 0.81 | -0.31 | 0.125315 | 0.350725943 | Ccdc138  | coiled-coil domain containing 138 [Source:RGD Symbol;Acc:1566050]                                             | 2 |
| ENSRNOG00000012580   | 792.12  | 675.11  | 909.13  | 1.35 | 0.43  | 3.70E-05 | 0.000506872 | Ccdc141  | coiled-coil domain containing 141 [Source:RGD Symbol;Acc:1593250]                                             | 2 |
| ENSRNOG000000033445  | 355.31  | 319.08  | 391.53  | 1.23 | 0.30  | 0.03571  | 0.144850703 | Ccdc171  | coiled-coil domain containing 171 [Source:RGD Symbol;Acc:1309931]                                             | 2 |
| ENSRNOG00000007404   | 343.25  | 363.59  | 322.91  | 0.89 | -0.17 | 0.230852 | 0.522387445 | Ccdc23   | coiled-coil domain containing 23 [Source:RGD Symbol;Acc:1311232]                                              | 2 |
| ENSRNOG000000050151  | 31.56   | 30.26   | 32.86   | 1.09 | 0.12  | 0.712364 | 0.957439891 | Ccdc40   | coiled-coil domain containing 40 [Source:RGD Symbol;Acc:1592112]                                              | 5 |
| ENSRNOG000000002748  | 651.38  | 624.70  | 678.06  | 1.09 | 0.12  | 0.312514 | 0.623070895 | Ccdc43   | coiled-coil domain containing 43 [Source:RGD Symbol;Acc:1311298]                                              | 2 |
| ENSRNOG000000021381  | 203.12  | 208.11  | 198.13  | 0.95 | -0.07 | 0.652726 | 0.917568787 | Ccdc68   | coiled-coil domain containing 68 [Source:RGD Symbol;Acc:1561424]                                              | 5 |
| ENSRNOG000000005713  | 637.35  | 578.63  | 696.06  | 1.20 | 0.27  | 0.021907 | 0.100773641 | Ccdc82   | coiled-coil domain containing 82 [Source:RGD Symbol;Acc:1359666]                                              | 2 |
| ENSRNOG0000000003374 | 471.79  | 433.40  | 510.18  | 1.18 | 0.24  | 0.053881 | 0.195896908 | Ccdc85a  | coiled-coil domain containing 85A [Source:RGD Symbol;Acc:1311700]                                             | 2 |
| ENSRNOG000000050233  | 1278.85 | 1371.43 | 1186.27 | 0.86 | -0.21 | 0.026465 | 0.116195123 | Cchcr1   | coiled-coil alpha-helical rod protein 1 [Source:RGD Symbol;Acc:1302992]                                       | 1 |
| ENSRNOG000000019321  | 25.21   | 26.43   | 24.00   | 0.91 | -0.14 | 0.741612 | 0.976583906 | Cck      | cholecystokinin [Source:RGD Symbol;Acc:2288]                                                                  | 1 |
| ENSRNOG000000043124  | 324.25  | 305.39  | 343.11  | 1.12 | 0.17  | 0.239963 | 0.532456505 | Cckar    | cholecystokinin A receptor [Source:RGD Symbol;Acc:2289]                                                       | 6 |
| ENSRNOG000000017679  | 44.36   | 42.08   | 46.64   | 1.11 | 0.15  | 0.481302 | 0.786232286 | Cckbr    | cholecystokinin B receptor [Source:RGD Symbol;Acc:2290]                                                       | 6 |
| ENSRNOG0000000021851 | 1.96    | 1.51    | 2.40    | 1.59 | 0.67  | 0.59701  | 0.873432296 | Ccl1     | chemokine (C-C motif) ligand 1 [Source:RGD Symbol;Acc:1586495]                                                | 3 |
| ENSRNOG000000007159  | 413.65  | 342.52  | 484.77  | 1.42 | 0.50  | 0.000276 | 0.002916567 | Ccl2     | chemokine (C-C motif) ligand 2 [Source:RGD Symbol;Acc:3645]                                                   | 4 |
| ENSRNOG000000011205  | 1.02    | 1.78    | 0.26    | 1.14 | -2.79 | 0.075778 | 0.249256206 | Ccl3     | chemokine (C-C motif) ligand 3 [Source:RGD Symbol;Acc:3647]                                                   | 4 |
| ENSRNOG000000011406  | 4.07    | 4.81    | 3.33    | 0.69 | -0.53 | 0.446456 | 0.763786055 | Ccl4     | chemokine (C-C motif) ligand 4 [Source:RGD Symbol;Acc:620441]                                                 | 4 |
| ENSRNOG000000010906  | 32.36   | 44.13   | 20.59   | 0.47 | -1.10 | 0.000304 | 0.003148263 | Ccl5     | chemokine (C-C motif) ligand 5 [Source:RGD Symbol;Acc:69069]                                                  | 6 |
| ENSRNOG000000015423  | 52.04   | 67.67   | 36.41   | 0.54 | -0.89 | 0.000395 | 0.003934452 | Ccna2    | cyclin A2 [Source:RGD Symbol;Acc:621059]                                                                      | 2 |
| ENSRNOG000000012678  | 8.99    | 10.33   | 7.65    | 0.74 | -0.43 | 0.396277 | 0.71505569  | Ccnb2    | cyclin B2 [Source:RGD Symbol;Acc:1308176]                                                                     | 2 |
| ENSRNOG000000007483  | 100.04  | 106.87  | 93.21   | 0.87 | -0.20 | 0.346902 | 0.663084233 | Ccnf     | cyclin F [Source:RGD Symbol;Acc:67401]                                                                        | 2 |
| ENSRNOG0000000003893 | 43.70   | 43.57   | 43.84   | 1.01 | 0.01  | 1        | 1           | Ccnj1    | cyclin J-like [Source:RGD Symbol;Acc:1561384]                                                                 | 2 |
| ENSRNOG000000011586  | 997.42  | 1053.33 | 941.52  | 0.89 | -0.16 | 0.101116 | 0.305102713 | Ccnl1    | cyclin L1 [Source:RGD Symbol;Acc:620864]                                                                      | 2 |
| ENSRNOG000000018691  | 3032.18 | 3358.25 | 2706.11 | 0.81 | -0.31 | 8.14E-05 | 0.001008805 | Ccnl2    | cyclin L2 [Source:RGD Symbol;Acc:1309149]                                                                     | 2 |
| ENSRNOG000000027405  | 1534.31 | 1387.41 | 1681.21 | 1.21 | 0.28  | 0.002123 | 0.015846826 | Ccp110   | centriolar coiled coil protein 110kDa [Source:RGD Symbol;Acc:1310509]                                         | 2 |
| ENSRNOG000000006715  | 10.84   | 19.53   | 2.14    | 0.11 | -3.19 | 1.52E-09 | 5.15E-08    | Ccr1     | chemokine (C-C motif) receptor 1 [Source:RGD Symbol;Acc:708446]                                               | 1 |
| ENSRNOG000000010665  | 6.11    | 10.24   | 1.99    | 0.19 | -2.36 | 8.31E-05 | 0.00102678  | Ccr7     | chemokine (C-C motif) receptor 7 [Source:RGD Symbol;Acc:735151]                                               | 1 |
| ENSRNOG000000007523  | 26.26   | 22.47   | 30.05   | 1.34 | 0.42  | 0.17677  | 0.442238311 | Cct6b    | chaperonin containing Tcp1, subunit 6B [zeta 2] [Source:RGD Symbol;Acc:1359453]                               | 1 |
| ENSRNOG0000000017819 | 66.67   | 84.01   | 49.34   | 0.59 | -0.77 | 0.000925 | 0.007983446 | Cd14     | CD14 molecule [Source:RGD Symbol;Acc:620588]                                                                  | 2 |
| ENSRNOG000000003298  | 4.58    | 5.98    | 3.19    | 0.53 | -0.91 | 0.15971  | 0.414262351 | Cd247    | Cd247 molecule [Source:RGD Symbol;Acc:2305]                                                                   | 2 |
| ENSRNOG000000016112  | 157.23  | 108.04  | 206.43  | 1.91 | 0.93  | 2.76E-07 | 6.17E-06    | Cd274    | CD274 molecule [Source:RGD Symbol;Acc:1566211]                                                                | 1 |
| ENSRNOG0000000037331 | 47.92   | 52.99   | 42.84   | 0.81 | -0.31 | 0.192197 | 0.46612322  | Cd33     | CD33 molecule [Source:RGD Symbol;Acc:1596020]                                                                 | 2 |
| ENSRNOG000000040108  | 73.88   | 104.82  | 42.94   | 0.41 | -1.29 | 2.04E-08 | 5.55E-07    | Cd36     | CD36 molecule (thrombospondin receptor) [Source:RGD Symbol;Acc:2301]                                          | 2 |
| ENSRNOG000000003069  | 100.76  | 96.05   | 105.46  | 1.10 | 0.13  | 0.653474 | 0.917657744 | Cd38     | CD38 molecule [Source:RGD Symbol;Acc:2303]                                                                    | 1 |
| ENSRNOG000000016294  | 360.66  | 436.73  | 284.58  | 0.65 | -0.62 | 1.68E-06 | 3.15E-05    | Cd4      | CD4 molecule [Source:RGD Symbol;Acc:2306]                                                                     | 1 |
| ENSRNOG000000018488  | 27.36   | 32.53   | 22.19   | 0.68 | -0.55 | 0.082259 | 0.263846592 | Cd40     | CD40 molecule, TNF receptor superfamily member 5 [Source:RGD Symbol;Acc:619830]                               | 1 |
| ENSRNOG000000006094  | 2233.40 | 2086.58 | 2380.21 | 1.14 | 0.19  | 0.034813 | 0.14210398  | Cd44     | CD44 molecule [Source:RGD Symbol;Acc:2307]                                                                    | 5 |
| ENSRNOG00000001964   | 1091.67 | 1063.41 | 1119.93 | 1.05 | 0.07  | 0.419198 | 0.739588613 | Cd47     | Cd47 molecule [Source:RGD Symbol;Acc:2308]                                                                    | 5 |
| ENSRNOG000000003927  | 2812.71 | 2309.87 | 3315.54 | 1.44 | 0.52  | 4.20E-10 | 1.52E-08    | Cd55     | Cd55 molecule [Source:RGD Symbol;Acc:620651]                                                                  | 3 |
| ENSRNOG000000020884  | 52.50   | 54.36   | 50.63   | 0.93 | -0.10 | 0.61825  | 0.890377816 | Cd6      | CD6 molecule [Source:RGD Symbol;Acc:2312]                                                                     | 5 |
| ENSRNOG000000000047  | 4313.70 | 4508.85 | 4118.55 | 0.91 | -0.13 | 0.008737 | 0.275759313 | Cd82     | CD82 molecule [Source:RGD Symbol;Acc:69070]                                                                   | 5 |
| ENSRNOG000000004489  | 408.77  | 508.87  | 308.66  | 0.61 | -0.72 | 2.99E-08 | 7.85E-07    | Cd97     | CD97 molecule [Source:RGD Symbol;Acc:1305595]                                                                 | 2 |
| ENSRNOG000000027787  | 33.72   | 41.96   | 25.47   | 0.61 | -0.72 | 0.016838 | 0.082433639 | Cdc6     | cell division cycle 6 [Source:RGD Symbol;Acc:1309157]                                                         | 2 |
| ENSRNOG000000002105  | 134.21  | 136.10  | 132.33  | 0.97 | -0.04 | 0.808122 | 1           | Cdc7     | cell division cycle 7 [Source:RGD Symbol;Acc:1308351]                                                         | 2 |
| ENSRNOG000000015529  | 36.25   | 51.78   | 20.72   | 0.40 | -1.32 | 3.45E-06 | 6.09E-05    | Cdca3    | cell division cycle associated 3 [Source:RGD Symbol;Acc:1359093]                                              | 2 |
| ENSRNOG000000031431  | 109.59  | 127.03  | 92.15   | 0.73 | -0.46 | 0.023573 | 0.106754326 | Cdca8    | cell division cycle associated 8 [Source:RGD Symbol;Acc:1566306]                                              | 2 |
| ENSRNOG0000000020151 | 9777.32 | 9992.38 | 9562.26 | 0.96 | -0.06 | 0.381706 | 0.697452011 | Cdh1     | cadherin 1 [Source:RGD Symbol;Acc:69279]                                                                      | 5 |
| ENSRNOG0000000009771 | 210.19  | 180.89  | 239.50  | 1.32 | 0.40  | 0.016325 | 0.080409897 | Cdh10    | cadherin 10 [Source:RGD Symbol;Acc:619741]                                                                    | 2 |
| ENSRNOG0000000038337 | 214.90  | 173.39  | 256.42  | 1.48 | 0.56  | 0.000874 | 0.007610083 | Cdh9     | cadherin 9, type 2, T1-cadherin [Source:RGD Symbol;Acc:1308343]                                               | 5 |
| ENSRNOG000000000632  | 65.31   | 86.66   | 43.96   | 0.51 | -0.98 | 5.59E-05 | 0.000729937 | Cdk1     | cyclin-dependent kinase 1 [Source:RGD Symbol;Acc:2319]                                                        | 2 |
| ENSRNOG000000022899  | 476.50  | 434.07  | 518.94  | 1.20 | 0.26  | 0.028925 | 0.124036715 | Cdk15    | cyclin-dependent kinase 15 [Source:RGD Symbol;Acc:1306205]                                                    | 5 |
| ENSRNOG000000008017  | 4069.66 | 4086.32 | 4053.00 | 0.99 | -0.01 | 0.889558 | 1           | Cdk5     | cyclin-dependent kinase 5 [Source:RGD Symbol;Acc:70514]                                                       | 1 |
| ENSRNOG000000021685  | 426.81  | 406.11  | 447.52  | 1.10 | 0.14  | 0.260886 | 0.561173678 | Cdk5r1   | cyclin-dependent kinase 5, regulatory subunit 1 (p35) [Source:RGD Symbol;Acc:629472]                          | 1 |
| ENSRNOG000000038720  | 486.15  | 442.87  | 529.43  | 1.20 | 0.26  | 0.037239 | 0.149539023 | Cdk11    | cyclin-dependent kinase-like 1 (CDC2-related kinase) [Source:RGD Symbol;Acc:1305080]                          | 3 |
| ENSRNOG000000000521  | 152.35  | 151.76  | 152.94  | 1.01 | 0.01  | 0.977524 | 1           | Cdkn1a   | cyclin-dependent kinase inhibitor 1A [Source:RGD Symbol;Acc:69328]                                            | 6 |
| ENSRNOG0000000021265 | 1624.77 | 1536.68 | 1712.86 | 1.11 | 0.16  | 0.068021 | 0.230485856 | Cds2     | CDP-diacylglycerol synthase (phosphatidate cytidylyltransferase) 2 [Source:RGD Symbol;Acc:6221186]            | 5 |
| ENSRNOG000000013970  | 99.06   | 122.10  | 76.02   | 0.62 | -0.68 | 0.001001 | 0.008540751 | Cdt1     | chromatin licensing and DNA replication factor 1 [Source:RGD Symbol;Acc:1309211]                              | 2 |
| ENSRNOG0000000032215 | 173.52  | 177.54  | 169.49  | 0.95 | -0.07 | 0.68955  | 0.943449877 | Cdyl     | chromodomain protein, Y-like [Source:RGD Symbol;Acc:1549745]                                                  | 2 |
| ENSRNOG000000042888  | 97.49   | 84.34   | 110.64  | 1.31 | 0.39  | 0.060473 | 0.212904686 | Cdyl2    | chromodomain protein, Y-like 2 [Source:RGD Symbol;Acc:1309548]                                                | 2 |
| ENSRNOG000000020578  | 281.82  | 308.45  | 255.19  | 0.83 | -0.27 | 0.050943 | 0.18768262  | Ceacam1  | carcinoembryonic antigen-related cell adhesion molecule 1 (biliary glycoprotein) [Source:RGD Symbol;Acc:2326] | 2 |
| ENSRNOG000000010918  | 74.46   | 83.97   | 64.96   | 0.77 | -0.37 | 0.106184 | 0.315629906 | Cebpa    | CCAAT/enhancer binding protein (C/EBP), alpha [Source:RGD Symbol;Acc:2326]                                    | 2 |
| ENSRNOG000000020875  | 214.44  | 217.83  | 211.06  | 0.97 | -0.05 | 0.865744 | 1           | Celf3    | CUGBP, Elav-like family member 3 [Source:RGD Symbol;Acc:1563168]                                              | 5 |
| ENSRNOG000000014503  | 438.05  | 393.09  | 483.00  | 1.23 | 0.30  | 0.020661 | 0.09641366  | Celf4    | CUGBP, Elav-like family member 4 [Source:RGD Symbol;Acc:1307630]                                              | 3 |
| ENSRNOG000000004695  | 375.19  | 309.09  | 441.28  | 1.43 | 0.51  | 0.000117 | 0.001381131 | Celf5    | CUGBP, Elav-like family member 5 [Source:RGD Symbol;Acc:1565016]                                              | 5 |
| ENSRNOG000000010817  | 847.10  | 793.03  | 901.18  | 1.14 | 0.18  | 0.073826 | 0.244       |          |                                                                                                               |   |

|                     |          |          |          |      |        |          |             |         |                                                                                                        |   |
|---------------------|----------|----------|----------|------|--------|----------|-------------|---------|--------------------------------------------------------------------------------------------------------|---|
| ENSRNOG00000026604  | 331.77   | 387.74   | 275.81   | 0.71 | -0.49  | 0.000607 | 0.005624156 | Cercam  | cerebral endothelial cell adhesion molecule [Source:RGD Symbol;Acc:1304778]                            | 2 |
| ENSRNOG00000013808  | 14.40    | 13.53    | 15.28    | 1.13 | 0.18   | 0.660318 | 0.923331519 | Ces2g   | carboxylesterase 2G [Source:RGD Symbol;Acc:1308358]                                                    | 2 |
| ENSRNOG00000025710  | 41.65    | 39.52    | 43.77    | 1.11 | 0.15   | 0.622381 | 0.893901042 | Ces5a   | carboxylesterase 5A [Source:RGD Symbol;Acc:1549717]                                                    | 3 |
| ENSRNOG00000007923  | 1097.39  | 1091.21  | 1103.57  | 1.01 | 0.02   | 0.956696 |             | Cgref1  | cell growth regulator with EF hand domain 1 [Source:RGD Symbol;Acc:620801]                             | 3 |
| ENSRNOG00000001531  | 330.07   | 288.03   | 372.10   | 1.29 | 0.37   | 0.01228  | 0.064201644 | Chac2   | ChaC, cation transport regulator homolog 2 (E. coli) [Source:RGD Symbol;Acc:1309120]                   | 2 |
| ENSRNOG00000046479  | 414.55   | 444.64   | 384.47   | 0.86 | -0.21  | 0.098767 | 0.300017428 | Chaf1a  | chromatin assembly factor 1, subunit A (p150) [Source:RGD Symbol;Acc:1590865]                          | 2 |
| ENSRNOG00000009722  | 2755.22  | 2815.28  | 2695.16  | 0.96 | -0.06  | 0.440213 | 0.759346741 | Chd3    | chromodomain helicase DNA binding protein 3 [Source:RGD Symbol;Acc:1311923]                            | 2 |
| ENSRNOG00000011268  | 938.70   | 887.41   | 989.99   | 1.12 | 0.16   | 0.098468 | 0.29952033  | Chd5    | chromodomain helicase DNA binding protein 5 [Source:RGD Symbol;Acc:1582725]                            | 2 |
| ENSRNOG00000000818  | 113.34   | 101.08   | 125.59   | 1.24 | 0.31   | 0.134938 | 0.369983843 | Chek1   | checkpoint kinase 1 [Source:RGD Symbol;Acc:620545]                                                     | 2 |
| ENSRNOG000000037430 | 1554.46  | 1490.18  | 1618.73  | 1.09 | 0.12   | 0.181681 | 0.449275855 | Chfr    | checkpoint with forkhead and ring finger domains, E3 ubiquitin protein ligase [Source:RGD Symbol;Acc:1 | 2 |
| ENSRNOG00000003162  | 1.15     | 2.31     | 0.00     | 0.00 | #NAME? | 0.005452 | 0.033907791 | Chia    | chitinase, acidic [Source:RGD Symbol;Acc:1303058]                                                      | 3 |
| ENSRNOG00000028072  | 54.52    | 69.41    | 39.64    | 0.57 | -0.81  | 0.001076 | 0.009031269 | Chit1   | chitinase 1 (chitotriosidase) [Source:RGD Symbol;Acc:1305646]                                          | 3 |
| ENSRNOG000000016791 | 1675.35  | 1607.67  | 1743.03  | 1.08 | 0.12   | 0.198511 | 0.47602821  | Chka    | choline kinase alpha [Source:RGD Symbol;Acc:61944]                                                     | 2 |
| ENSRNOG00000018385  | 2.94     | 4.01     | 1.88     | 0.47 | -1.09  | 0.222902 | 0.511052439 | Chrm1   | cholinergic receptor, muscarinic 1 [Source:RGD Symbol;Acc:2342]                                        | 1 |
| ENSRNOG00000046972  | 4.09     | 2.35     | 5.84     | 2.49 | 1.32   | 0.060813 | 0.21378037  | Chrm2   | cholinergic receptor, muscarinic 2 [Source:RGD Symbol;Acc:620023]                                      | 1 |
| ENSRNOG000000049410 | 87.63    | 80.02    | 95.24    | 1.19 | 0.25   | 0.241823 | 0.534610732 | Chrm3   | cholinergic receptor, muscarinic 3 [Source:RGD Symbol;Acc:2343]                                        | 1 |
| ENSRNOG00000017556  | 158.45   | 154.44   | 162.46   | 1.05 | 0.07   | 0.674668 | 0.932825489 | Chrm4   | cholinergic receptor, muscarinic 4 [Source:RGD Symbol;Acc:2344]                                        | 2 |
| ENSRNOG00000017556  | 158.45   | 154.44   | 162.46   | 1.05 | 0.07   | 0.674668 | 0.932825489 | Chrm4   | cholinergic receptor, muscarinic 4 [Source:RGD Symbol;Acc:2344]                                        | 4 |
| ENSRNOG00000006397  | 4.95     | 4.56     | 5.34     | 1.17 | 0.23   | 0.737772 | 0.97447342  | Chrm5   | cholinergic receptor, muscarinic 5 [Source:RGD Symbol;Acc:620027]                                      | 1 |
| ENSRNOG00000011202  | 141.29   | 144.23   | 138.35   | 0.96 | -0.06  | 0.855977 |             | Chrna4  | cholinergic receptor, nicotinic, alpha 4 (neuronal) [Source:RGD Symbol;Acc:2346]                       | 6 |
| ENSRNOG00000013610  | 217.80   | 189.47   | 246.13   | 1.30 | 0.38   | 0.026012 | 0.114832292 | Chrna5  | cholinergic receptor, nicotinic, alpha 5 (neuronal) [Source:RGD Symbol;Acc:2347]                       | 1 |
| ENSRNOG00000012283  | 961.66   | 839.70   | 1083.62  | 1.29 | 0.37   | 0.000316 | 0.003253042 | Chrna6  | cholinergic receptor, nicotinic, alpha 6 (neuronal) [Source:RGD Symbol;Acc:69281]                      | 1 |
| ENSRNOG00000020778  | 2379.19  | 2195.92  | 2562.46  | 1.17 | 0.22   | 0.004209 | 0.027505105 | Chrnb2  | cholinergic receptor, nicotinic, beta 2 (neuronal) [Source:RGD Symbol;Acc:62350]                       | 7 |
| ENSRNOG00000012448  | 362.60   | 235.27   | 489.94   | 2.08 | 1.06   | 2.07E-14 | 1.17E-12    | Chrnb3  | cholinergic receptor, nicotinic, beta 3 (neuronal) [Source:RGD Symbol;Acc:621544]                      | 3 |
| ENSRNOG00000014427  | 446.06   | 347.54   | 544.57   | 1.57 | 0.65   | 2.33E-07 | 5.29E-06    | Chrnb4  | cholinergic receptor, nicotinic, beta 4 (neuronal) [Source:RGD Symbol;Acc:2351]                        | 1 |
| ENSRNOG000000003777 | 721.52   | 715.78   | 727.26   | 1.02 | 0.02   | 0.920687 |             | Chrne   | cholinergic receptor, nicotinic, epsilon (muscle) [Source:RGD Symbol;Acc:2353]                         | 3 |
| ENSRNOG00000022485  | 778.08   | 743.13   | 813.03   | 1.09 | 0.13   | 0.234242 | 0.526724006 | Chuk    | conserved helix-loop-helix ubiquitous kinase [Source:RGD Symbol;Acc:1306661]                           | 6 |
| ENSRNOG00000036894  | 1257.17  | 1270.79  | 1243.55  | 0.98 | -0.03  | 0.711088 | 0.95627511  | Cisd3   | CDGSH iron sulfur domain 3 [Source:RGD Symbol;Acc:1559720]                                             | 2 |
| ENSRNOG00000046607  | 15.95    | 17.31    | 14.59    | 0.84 | -0.25  | 0.558166 | 0.842943624 | Cited4  | Cbp/p300-interacting transactivator, with Glu/Asp-rich carboxy-terminal domain, 4 [Source:RGD          | 3 |
| ENSRNOG000000204650 | 26.58    | 32.23    | 20.94    | 0.65 | -0.62  | 0.043106 | 0.166540788 | Ckap2   | Symbl;Acc:620113]                                                                                      | 2 |
| ENSRNOG000000026143 | 49.64    | 53.79    | 45.49    | 0.85 | -0.24  | 0.343835 | 0.659017542 | Ckap2l  | cytoskeleton associated protein 2 [Source:RGD Symbol;Acc:1311631]                                      | 2 |
| ENSRNOG00000016067  | 5804.14  | 5368.85  | 6239.43  | 1.16 | 0.22   | 0.005034 | 0.031791186 | Ckap5   | cytoskeleton associated protein 2-like [Source:RGD Symbol;Acc:1590645]                                 | 2 |
| ENSRNOG000000042561 | 177.02   | 177.61   | 176.42   | 0.99 | -0.01  | 0.972198 |             | Cks1b   | cytoskeleton associated protein 5 [Source:RGD Symbol;Acc:1563596]                                      | 2 |
| ENSRNOG00000013771  | 52.61    | 45.46    | 59.76    | 1.31 | 0.39   | 0.12607  | 0.35209846  | Clca2   | CDC28 protein kinase regulatory subunit 1B [Source:RGD Symbol;Acc:1561797]                             | 2 |
| ENSRNOG000000029889 | 1.52     | 1.59     | 1.44     | 0.91 | -0.14  | 1        |             | C1ca4   | chloride channel accessory 2 [Source:RGD Symbol;Acc:1304894]                                           | 3 |
| ENSRNOG00000013334  | 4.17     | 5.72     | 2.63     | 0.46 | -1.12  | 0.10638  | 0.315819456 | C1ca5   | chloride channel accessory 4 [Source:RGD Symbol;Acc:1303234]                                           | 3 |
| ENSRNOG000000008345 | 3150.96  | 2931.55  | 3370.36  | 1.15 | 0.20   | 0.009054 | 0.051039104 | C1cn6   | chloride channel accessory 5 [Source:RGD Symbol;Acc:621100]                                            | 3 |
| ENSRNOG000000003755 | 2029.83  | 1785.78  | 2273.87  | 1.27 | 0.35   | 5.38E-05 | 0.000705654 | C1gn    | chloride channel, voltage-sensitive 6 [Source:RGD Symbol;Acc:1305379]                                  | 1 |
| ENSRNOG00000025768  | 3756.38  | 3538.16  | 3974.60  | 1.12 | 0.17   | 0.038089 | 0.151995581 | Clk1    | calmegin [Source:RGD Symbol;Acc:1592643]                                                               | 5 |
| ENSRNOG000000020500 | 887.22   | 989.87   | 784.56   | 0.79 | -0.34  | 0.001056 | 0.008906827 | Clk2    | CDC-like kinase 1 [Source:RGD Symbol;Acc:1311469]                                                      | 2 |
| ENSRNOG000000030126 | 1984.71  | 2109.47  | 1859.95  | 0.88 | -0.18  | 0.032045 | 0.133845147 | Clk3    | CDC-like kinase 2 [Source:RGD Symbol;Acc:1359711]                                                      | 2 |
| ENSRNOG000000030714 | 1106.33  | 1067.75  | 1144.92  | 1.07 | 0.10   | 0.345708 | 0.661580652 | Clk4    | CDC-like kinase 3 [Source:RGD Symbol;Acc:621259]                                                       | 2 |
| ENSRNOG00000011201  | 54.44    | 57.80    | 51.08    | 0.88 | -0.18  | 0.492496 | 0.187623267 | Cmnt8   | CDC-like kinase 4 [Source:RGD Symbol;Acc:1310274]                                                      | 2 |
| ENSRNOG00000017582  | 1.38     | 1.78     | 0.97     | 0.55 | -0.87  | 0.513429 | 0.813794125 | Cnga3   | CK1F-like MARVEL transmembrane domain containing 8 [Source:RGD Symbol;Acc:735040]                      | 5 |
| ENSRNOG00000020247  | 621.15   | 601.31   | 640.98   | 1.07 | 0.09   | 0.424126 | 0.744486799 | Cnih2   | cyclic nucleotide gated channel alpha 3 [Source:RGD Symbol;Acc:70948]                                  | 4 |
| ENSRNOG000000008223 | 1528.78  | 1247.01  | 1810.55  | 1.45 | 0.54   | 1.27E-09 | 4.33E-08    | Cnr1    | cornichon family AMPA receptor auxiliary protein 2 [Source:RGD Symbol;Acc:1304930]                     | 5 |
| ENSRNOG000000009260 | 34.45    | 45.15    | 23.76    | 0.53 | -0.93  | 0.001136 | 0.009428537 | Cnr2    | cannabinoid receptor 1 (brain) [Source:RGD Symbol;Acc:2369]                                            | 1 |
| ENSRNOG000000006144 | 264.59   | 236.73   | 292.44   | 1.24 | 0.30   | 0.050323 | 0.187643957 | Cntn3   | cannabinoid receptor 2 (macrophage) [Source:RGD Symbol;Acc:619713]                                     | 1 |
| ENSRNOG000000004281 | 1322.22  | 1203.90  | 1440.54  | 1.20 | 0.26   | 0.005915 | 0.036261804 | Cobl    | contactin 3 (plasmacytoma associated) [Source:RGD Symbol;Acc:3253]                                     | 2 |
| ENSRNOG000000000545 | 43.03    | 68.45    | 17.60    | 0.26 | -1.96  | 1.15E-11 | 4.87E-10    | Col10a1 | cord-on-bleu WH2 repeat protein [Source:RGD Symbol;Acc:1312002]                                        | 2 |
| ENSRNOG000000000463 | 728.72   | 891.52   | 565.91   | 0.63 | -0.66  | 8.38E-09 | 1.21E-07    | Col11a2 | collagen, type X, alpha 1 [Source:RGD Symbol;Acc:2371]                                                 | 3 |
| ENSRNOG000000014143 | 654.09   | 762.18   | 546.00   | 0.72 | -0.48  | 1.95E-05 | 0.000284206 | Col24a1 | collagen, type XI, alpha 2 [Source:RGD Symbol;Acc:2373]                                                | 1 |
| ENSRNOG000000012920 | 323.14   | 385.22   | 261.06   | 0.68 | -0.56  | 3.41E-05 | 0.000470214 | Col9a1  | collagen, type XXIV, alpha 1 [Source:RGD Symbol;Acc:1565539]                                           | 2 |
| ENSRNOG00000001889  | 2760.82  | 2673.25  | 2848.39  | 1.07 | 0.09   | 0.255739 | 0.554126951 | Comt    | collagen, type IX, alpha 1 [Source:RGD Symbol;Acc:1309425]                                             | 1 |
| ENSRNOG000000209571 | 798.55   | 821.54   | 775.56   | 0.94 | -0.08  | 0.429739 | 0.748464491 | Coq10a  | catechol-O-methyltransferase [Source:RGD Symbol;Acc:2379]                                              | 1 |
| ENSRNOG000000019430 | 2356.58  | 2542.13  | 2171.03  | 0.85 | -0.23  | 0.004172 | 0.02731954  | Coro1a  | coenzyme Q10 homolog A (S. cerevisiae) [Source:RGD Symbol;Acc:1562447]                                 | 1 |
| ENSRNOG000000008901 | 853.33   | 771.74   | 934.92   | 1.21 | 0.28   | 0.006766 | 0.040418008 | Coro2a  | coronin, actin binding protein 1A [Source:RGD Symbol;Acc:620009]                                       | 2 |
| ENSRNOG00000013439  | 126.69   | 109.22   | 144.16   | 1.32 | 0.40   | 0.034392 | 0.140765115 | Cpn1    | coronin, actin binding protein 2A [Source:RGD Symbol;Acc:1309719]                                      | 5 |
| ENSRNOG000000043286 | 1262.14  | 1246.85  | 1277.43  | 1.02 | 0.03   | 0.667757 | 0.92853425  | Cpne2   | carboxypeptidase N, polypeptide 1 [Source:RGD Symbol;Acc:70931]                                        | 7 |
| ENSRNOG000000006298 | 621.03   | 495.66   | 746.39   | 1.51 | 0.59   | 1.25E-07 | 2.97E-06    | Cpne3   | copine II [Source:RGD Symbol;Acc:1586036]                                                              | 5 |
| ENSRNOG000000005222 | 532.45   | 515.70   | 549.19   | 1.06 | 0.09   | 0.412782 | 0.732083607 | Cpne5   | copine III [Source:RGD Symbol;Acc:1310178]                                                             | 5 |
| ENSRNOG00000026128  | 566.18   | 531.95   | 600.40   | 1.13 | 0.17   | 0.14497  | 0.388670478 | Cpne8   | copine V [Source:RGD Symbol;Acc:1308021]                                                               | 5 |
| ENSRNOG00000023077  | 404.26   | 391.54   | 416.98   | 1.06 | 0.09   | 0.459367 | 0.775315279 | Cpne9   | copine VIII [Source:RGD Symbol;Acc:1307939]                                                            | 2 |
| ENSRNOG0000001654   | 646.43   | 618.40   | 674.46   | 1.09 | 0.13   | 0.276176 | 0.581041775 | Cpox    | copine family member IX [Source:RGD Symbol;Acc:1309212]                                                | 2 |
| ENSRNOG00000000985  | 281.70   | 326.19   | 237.22   | 0.73 | -0.46  | 0.002114 | 0.015797536 | Cpsf4   | coproporphyrinogen oxidase [Source:RGD Symbol;Acc:1311817]                                             | 2 |
| ENSRNOG00000013412  | 356.70   | 309.54   | 403.86   | 1.30 | 0.38   | 0.006508 | 0.039211409 | Creb1   | cleavage and polyadenylation specific factor 4 [Source:RGD Symbol;Acc:620440]                          | 2 |
| ENSRNOG00000018987  | 1234.85  | 1240.01  | 1229.69  | 0.99 | -0.01  | 0.910498 |             | Crebzf1 | cAMP responsive element binding protein 1 [Source:RGD Symbol;Acc:620218]                               | 1 |
| ENSRNOG000000009414 | 5674.63  | 5758.07  | 5591.19  | 0.97 | -0.04  | 0.564416 | 0.848480852 | Credl1  | CREB/ATF bZIP transcription factor [Source:RGD Symbol;Acc:1565584]                                     | 2 |
| ENSRNOG00000012703  | 8.00     | 6.09     | 9.90     | 1.63 | 0.70   | 0.255897 | 0.554411812 | Crh     | cysteine-rich with EGF-like domains 1 [Source:RGD Symbol;Acc:1309412]                                  | 1 |
| ENSRNOG00000017890  | 2.43     | 2.58     | 2.27     | 0.88 | -0.18  | 0.890361 |             | Crhbp   | corticotropin releasing hormone [Source:RGD Symbol;Acc:620505]                                         | 2 |
| ENSRNOG000000004900 | 44.47    | 48.41    | 40.53    | 0.84 | -0.26  | 0.360991 | 0.676842259 | Crhrl1  | corticotropin releasing hormone binding protein [Source:RGD Symbol;Acc:2403]                           | 1 |
| ENSRNOG00000011145  | 65.48    | 79.33    | 51.62    | 0.65 | -0.62  | 0.00977  | 0.054163141 | Crhr2   | corticotropin releasing hormone receptor 1 [Source:RGD Symbol;Acc:61276]                               | 1 |
| ENSRNOG000000005041 | 12518.95 | 12853.49 | 12184.41 | 0.95 | -0.08  | 0.303691 | 0.61248951  | Crip2   | corticotropin releasing hormone receptor 2 [Source:RGD Symbol;Acc:70547]                               | 4 |
| ENSRNOG000000004781 | 4017.17  | 3951.94  | 4082.39  | 1.03 | 0.05   | 0.535961 | 0.83315454  | Crmp1   | cysteine-rich protein 2 [Source:RGD Symbol;Acc:1302959]                                                | 6 |
| ENSRNOG000000008334 | 444.00   | 501.41   | 386.59   | 0.77 | -0.38  | 0.003825 | 0.025521938 | Crocc   | collapsin response mediator protein 1 [Source:RGD Symbol;Acc:2407]                                     | 2 |
| ENSRNOG000000047175 | 45.19    | 46.95    | 43.43    | 0.93 | -0.11  | 0.66952  | 0.929745571 | Cryaa   | ciliary rootlet coiled-coil, rootletin [Source:RGD Symbol;Acc:1305364]                                 | 2 |
| ENSRNOG00000026805  | 0.47     | 0.24     | 0.70     | 2.93 | 1.55   | 0.693241 | 0.943449877 | Csf2    | crystallin, alpha A [Source:RGD Symbol;Acc:2413]                                                       | 1 |
| ENSRNOG00000049782  | 186.35   | 236.89   | 135.81   | 0.57 | -0.80  | 2.78E-06 | 5.00E-05    | Csf2ra  | colony stimulating factor 2 (granulocyte-macrophage) [Source:RGD Symbol;Acc:621065]                    | 1 |
| ENSRNOG00000000187  | 36.73    | 56.37    | 17.09    | 0.30 | -1.72  | 6.52E-09 | 1.95E-07    | Csf2rb  | colony stimulating factor 2 receptor, alpha, low-affinity (granulocyte-macrophage) [Source:RGD         | 2 |
| ENSRNOG00000019374  | 3594.12  | 3594.81  | 3593.44  | 1.00 | 0.00   | 0.982692 |             | Csk     | Symbl;Acc:620189]                                                                                      | 1 |
| ENSRNOG00000017106  | 6197.53  | 5938.01  | 6457.06  | 1.09 | 0.12   | 0.111439 | 0.331992597 | Csnk1a1 | c-src tyrosine kinase [Source:RGD Symbol;Acc:1308800]                                                  | 1 |
| ENSRNOG00000013076  | 1109.60  | 1137.77  | 1081.44  | 0.95 | -0.07  | 0.474205 | 0.780237584 | Csnk1e  | casein kinase 1, alpha 1 [Source:RGD Symbol;Acc:71098]                                                 | 1 |
| ENSRNOG000000021718 | 628.64   | 614.68   | 642.61   | 1.05 | 0.06   | 0.57251  | 0.855770831 | Csp1    | casein kinase 1, epsilon [Source:RGD Symbol;Acc:62045]                                                 | 6 |
| ENSRNOG000000005359 | 53.36    | 39.60    | 67.11    | 1.69 | 0.76   | 0.001979 | 0.014963694 | Csrnp3  | centrosome and spindle pole associated protein 1 [Source:RGD Symbol;Acc:1307055]                       | 2 |
| ENSRNOG00000012089  | 472.10   | 437.00   | 507.20   | 1.16 | 0.21   | 0.093995 |             |         |                                                                                                        |   |

|                     |          |          |          |       |       |          |             |          |                                                                                                             |   |
|---------------------|----------|----------|----------|-------|-------|----------|-------------|----------|-------------------------------------------------------------------------------------------------------------|---|
| ENSRNOG00000002792  | 2.05     | 3.09     | 1.02     | 0.33  | -1.60 | 0.090923 | 0.284093942 | Cxcl2    | chemokine (C-X-C motif) ligand 2 [Source:RGD Symbol;Acc:70069]                                              | 3 |
| ENSRNOG000000045764 | 422.41   | 367.35   | 477.48   | 1.30  | 0.38  | 0.003621 | 0.024343097 | Cxcr4    | CXCR4 finger protein 4 [Source:RGD Symbol;Acc:69228]                                                        | 6 |
| ENSRNOG00000003622  | 134.52   | 191.46   | 77.58    | 0.41  | -1.30 | 1.00E-11 | 4.30E-10    | Cybb     | cytochrome b-245, beta polypeptide [Source:RGD Symbol;Acc:620574]                                           | 1 |
| ENSRNOG000000000196 | 1.87     | 3.03     | 0.71     | 0.23  | -2.10 | 0.045844 | 0.173560443 | Cyp19a1  | cytochrome P450, family 19, subfamily a, polypeptide 3 [Source:RGD Symbol;Acc:2457]                         | 1 |
| ENSRNOG000000013291 | 3.21     | 2.74     | 3.68     | 1.34  | 0.43  | 0.735929 | 0.972754823 | Cyp2c23  | cytochrome P450, family 2, subfamily c, polypeptide 23 [Source:RGD Symbol;Acc:620370]                       | 1 |
| ENSRNOG000000029128 | 1.36     | 1.97     | 0.75     | 0.38  | -1.39 | 0.227625 | 0.517377347 | Cyp2d5   | cytochrome P450, family 2, subfamily d, polypeptide 5 [Source:RGD Symbol;Acc:628630]                        | 1 |
| ENSRNOG000000012458 | 1.55     | 2.61     | 0.49     | 0.19  | -2.41 | 0.04719  | 0.177272797 | Cyp2e1   | cytochrome P450, family 2, subfamily e, polypeptide 1 [Source:RGD Symbol;Acc:2475]                          | 1 |
| ENSRNOG000000042224 | 505.62   | 517.48   | 493.76   | 0.95  | -0.07 | 0.61834  | 0.890386313 | Cyp2j10  | cytochrome P450, family 2, subfamily j, polypeptide 10 [Source:RGD Symbol;Acc:1563215]                      | 2 |
| ENSRNOG000000010519 | 271.16   | 287.44   | 254.88   | 0.89  | -0.17 | 0.247945 | 0.543570473 | Cyp39a1  | cytochrome P450, family 39, subfamily a, polypeptide 1 [Source:RGD Symbol;Acc:1307471]                      | 1 |
| ENSRNOG000000009741 | 43.24    | 51.40    | 35.08    | 0.68  | -0.55 | 0.038449 | 0.152922289 | Cyp4b1   | cytochrome P450, family 4, subfamily b, polypeptide 1 [Source:RGD Symbol;Acc:2480]                          | 2 |
| ENSRNOG000000029478 | 481.94   | 503.13   | 460.75   | 0.92  | -0.13 | 0.329936 | 0.642333829 | Cyp4f39  | cytochrome P450, family 4, subfamily f, polypeptide 39 [Source:RGD Symbol;Acc:1308796]                      | 5 |
| ENSRNOG000000014350 | 214.57   | 293.63   | 135.51   | 0.46  | -1.12 | 1.03E-11 | 4.39E-10    | Cyrb1    | cysteine-rich, angiogenic inducer, 61 [Source:RGD Symbol;Acc:620763]                                        | 3 |
| ENSRNOG000000015042 | 94.05    | 75.88    | 112.21   | 1.48  | 0.56  | 0.009441 | 0.052743153 | Cysl2r2  | cysteinyl leukotriene receptor 2 [Source:RGD Symbol;Acc:619797]                                             | 5 |
| ENSRNOG000000018775 | 2960.04  | 2846.23  | 3073.85  | 1.08  | 0.11  | 0.188067 | 0.459499944 | Cystm1   | cysteine-rich transmembrane module containing 1 [Source:RGD Symbol;Acc:2323233]                             | 1 |
| ENSRNOG000000007410 | 230.03   | 205.51   | 254.55   | 1.24  | 0.31  | 0.05052  | 0.186329228 | Dab1     | Dab, reelin signal transducer, homolog 1 (Drosophila) [Source:RGD Symbol;Acc:628770]                        | 1 |
| ENSRNOG000000000694 | 48.57    | 8.57     | 88.58    | 10.34 | 3.37  | 1.98E-26 | 2.17E-24    | Dao      | D-amino-acid oxidase [Source:RGD Symbol;Acc:621138]                                                         | 1 |
| ENSRNOG000000018198 | 2640.99  | 2537.43  | 2744.55  | 1.08  | 0.11  | 0.163602 | 0.420034749 | Dapk1    | death associated protein kinase 1 [Source:RGD Symbol;Acc:1311629]                                           | 5 |
| ENSRNOG000000017332 | 137.28   | 181.11   | 93.45    | 0.52  | -0.95 | 5.77E-07 | 1.21E-05    | Dapk2    | death-associated protein kinase 2 [Source:RGD Symbol;Acc:1304708]                                           | 5 |
| ENSRNOG000000020383 | 2261.69  | 2411.91  | 2111.47  | 0.88  | -0.19 | 0.021992 | 0.101006354 | Dapk3    | death-associated protein kinase 3 [Source:RGD Symbol;Acc:621766]                                            | 2 |
| ENSRNOG000000050482 | 19.65    | 18.63    | 20.67    | 1.11  | 0.15  | 0.712131 | 0.949435536 | Dbf4     | DBF4 zinc finger [Source:RGD Symbol;Acc:1305854]                                                            | 2 |
| ENSRNOG000000006641 | 121.08   | 220.42   | 21.74    | 0.10  | -3.34 | 6.54E-49 | 1.42E-46    | Dbh      | dopamine beta-hydroxylase (dopamine beta-monoxygenase) [Source:RGD Symbol;Acc:2489]                         | 1 |
| ENSRNOG000000046889 | 16391.84 | 15727.10 | 17056.57 | 1.08  | 0.12  | 0.151987 | 0.40199761  | Dbi      | diazepam binding inhibitor (GABA receptor modulator, acyl-CoA binding protein) [Source:RGD Symbol;Acc:2490] | 1 |
| ENSRNOG000000014571 | 2807.17  | 2637.94  | 2976.41  | 1.13  | 0.17  | 0.037907 | 0.151441409 | Dbnnd2   | dysbindin (dystrobrevin binding protein 1) domain containing 2 [Source:RGD Symbol;Acc:1559521]              | 2 |
| ENSRNOG000000006885 | 2.17     | 0.24     | 4.11     | 17.22 | 4.11  | 0.001144 | 0.009471443 | Dbx2     | developing brain homeobox 2 [Source:RGD Symbol;Acc:1359605]                                                 | 3 |
| ENSRNOG000000023458 | 437.25   | 408.60   | 465.90   | 1.14  | 0.19  | 0.1431   | 0.385474569 | Dcaf12l1 | DBD1 and CUL4 associated factor 12-like 1 [Source:RGD Symbol;Acc:1563873]                                   | 3 |
| ENSRNOG000000031533 | 2.11     | 3.06     | 1.16     | 0.38  | -1.39 | 0.1571   | 0.410102406 | Dcaf12l2 | DBD1 and CUL4 associated factor 12-like 2 [Source:RGD Symbol;Acc:1560768]                                   | 3 |
| ENSRNOG000000006551 | 1050.18  | 1136.76  | 963.61   | 0.85  | -0.24 | 0.014792 | 0.074318807 | Dcaf15   | DBD1 and CUL4 associated factor 15 [Source:RGD Symbol;Acc:1304881]                                          | 2 |
| ENSRNOG000000033026 | 550.60   | 643.86   | 457.34   | 0.71  | -0.49 | 3.03E-05 | 0.00422565  | Dckl3    | doublecortin-like kinase 3 [Source:RGD Symbol;Acc:1309232]                                                  | 2 |
| ENSRNOG000000047712 | 217.65   | 185.07   | 250.24   | 1.35  | 0.44  | 0.006933 | 0.04116286  | Dcx      | doublecortin [Source:RGD Symbol;Acc:620670]                                                                 | 5 |
| ENSRNOG000000039417 | 3276.16  | 3279.39  | 3272.92  | 1.00  | 0.00  | 0.993396 | 1           | Ddda1    | DET1 and DBD1 associated 1 [Source:RGD Symbol;Acc:1584153]                                                  | 2 |
| ENSRNOG00000004327  | 36.53    | 31.77    | 41.30    | 1.30  | 0.38  | 0.199445 | 0.477206498 | Ddc      | dopa decarboxylase (aromatic L-amino acid decarboxylase) [Source:RGD Symbol;Acc:2494]                       | 1 |
| ENSRNOG000000006789 | 942.70   | 950.79   | 934.62   | 0.98  | -0.02 | 0.713762 | 0.958277109 | Ddit3    | DNA-damage inducible transcript 3 [Source:RGD Symbol;Acc:62391]                                             | 1 |
| ENSRNOG000000000830 | 3756.24  | 3779.33  | 3733.14  | 0.99  | -0.02 | 0.876882 | 1           | Ddr1     | discoidin domain receptor tyrosine kinase 1 [Source:RGD Symbol;Acc:2252]                                    | 2 |
| ENSRNOG000000051170 | 5636.48  | 5602.35  | 5670.60  | 1.01  | 0.02  | 0.794602 | 1           | Ddx17    | DEAD (Asp-Glu-Ala-Asp) box helicase 17 [Source:RGD Symbol;Acc:1304945]                                      | 2 |
| ENSRNOG000000009166 | 4196.41  | 4406.68  | 3986.15  | 0.90  | -0.14 | 0.067466 | 0.229517633 | Ddx24    | DEAD (Asp-Glu-Ala-Asp) box helicase 24 [Source:RGD Symbol;Acc:727929]                                       | 1 |
| ENSRNOG000000046662 | 91.55    | 83.71    | 99.38    | 1.19  | 0.25  | 0.243736 | 0.537764982 | Ddx26b   | DEAD/H (Asp-Glu-Ala-Asp/His) box polypeptide 26B [Source:MGI Symbol;Acc:MGI:2442593]                        | 2 |
| ENSRNOG000000050868 | 0.50     | 0.51     | 0.49     | 0.97  | -0.04 | 1        | 1           | Ddx43    | DEAD (Asp-Glu-Ala-Asp) box polypeptide 43 [Source:RGD Symbol;Acc:1586947]                                   | 3 |
| ENSRNOG00000001043  | 486.43   | 527.15   | 445.71   | 0.85  | -0.24 | 0.041538 | 0.161912157 | Ddx55    | DEAD (Asp-Glu-Ala-Asp) box polypeptide 55 [Source:RGD Symbol;Acc:2324094]                                   | 2 |
| ENSRNOG000000017960 | 1913.66  | 2036.20  | 1791.12  | 0.88  | -0.19 | 0.032652 | 0.135649954 | Deaf1    | DEAF1 transcription factor [Source:RGD Symbol;Acc:620671]                                                   | 2 |
| ENSRNOG000000046112 | 496.38   | 496.80   | 495.95   | 1.00  | 0.00  | 1        | 1           | Dedd2    | death effector domain containing 2 [Source:RGD Symbol;Acc:1588968]                                          | 2 |
| ENSRNOG000000000502 | 487.50   | 526.02   | 448.99   | 0.85  | -0.23 | 0.067364 | 0.229257258 | Def6     | differentially expressed in FDCP 6 homolog (mouse) [Source:RGD Symbol;Acc:1307945]                          | 2 |
| ENSRNOG000000016152 | 978.92   | 986.26   | 971.58   | 0.99  | -0.02 | 0.778061 | 0.997325297 | DeK      | DEK proto-oncogene [Source:RGD Symbol;Acc:1303246]                                                          | 5 |
| ENSRNOG000000029866 | 707.87   | 717.79   | 697.96   | 0.97  | -0.04 | 0.70918  | 0.955089967 | Dennd6b  | DENN/MADD domain containing 6B [Source:RGD Symbol;Acc:1308012]                                              | 2 |
| ENSRNOG000000010701 | 39.33    | 35.90    | 42.76    | 1.19  | 0.25  | 0.364223 | 0.680535063 | Depdc1b  | DEP domain containing 1B [Source:RGD Symbol;Acc:1305799]                                                    | 2 |
| ENSRNOG000000025030 | 255.54   | 265.80   | 245.28   | 0.92  | -0.12 | 0.441094 | 0.760242832 | Dffb     | DNA fragmentation factor, 40kDa, beta polypeptide (caspase-activated DNase) [Source:RGD Symbol;Acc:2        |   |
| ENSRNOG00000001796  | 466.70   | 411.76   | 521.64   | 1.27  | 0.34  | 0.005427 | 0.033761146 | Dgkg     | diacylglycerol kinase, gamma [Source:RGD Symbol;Acc:2499]                                                   | 5 |
| ENSRNOG000000010065 | 972.04   | 814.49   | 1129.59  | 1.39  | 0.47  | 2.84E-06 | 5.10E-05    | Dgkh     | diacylglycerol kinase, eta [Source:RGD Symbol;Acc:1561955]                                                  | 5 |
| ENSRNOG000000026705 | 706.11   | 637.62   | 774.61   | 1.21  | 0.28  | 0.009818 | 0.054349698 | Dgki     | diacylglycerol kinase, iota [Source:RGD Symbol;Acc:735049]                                                  | 5 |
| ENSRNOG000000039323 | 2.50     | 1.64     | 3.37     | 2.06  | 1.04  | 0.22087  | 0.508349901 | Dgkk     | diacylglycerol kinase kappa [Source:RGD Symbol;Acc:1561510]                                                 | 5 |
| ENSRNOG000000017737 | 12801.96 | 12853.96 | 12749.96 | 0.99  | -0.01 | 0.866707 | 1           | Dgkz     | diacylglycerol kinase zeta [Source:RGD Symbol;Acc:70929]                                                    | 5 |
| ENSRNOG000000027891 | 359.87   | 377.40   | 342.34   | 0.91  | -0.14 | 0.357057 | 0.672307646 | Dhrs11   | dehydrogenase/reductase (SDR family) member 11 [Source:RGD Symbol;Acc:1307935]                              | 2 |
| ENSRNOG000000030157 | 1109.16  | 1171.46  | 1046.87  | 0.89  | -0.16 | 0.078826 | 0.256077981 | Dhx16    | DEAH (Asp-Glu-Ala-His) box polypeptide 16 [Source:RGD Symbol;Acc:1302963]                                   | 1 |
| ENSRNOG000000018247 | 201.96   | 190.55   | 213.37   | 1.12  | 0.16  | 0.285278 | 0.590683994 | Dhx58    | DEXH (Asp-Glu-X-His) box polypeptide 58 [Source:RGD Symbol;Acc:1310093]                                     | 1 |
| ENSRNOG000000010711 | 698.64   | 695.73   | 701.54   | 1.01  | 0.01  | 0.877284 | 1           | Dicer1   | dicer 1, ribonuclease type III [Source:RGD Symbol;Acc:1309381]                                              | 2 |
| ENSRNOG000000013596 | 364.46   | 340.26   | 388.66   | 1.14  | 0.19  | 0.167206 | 0.426167044 | Dimt1    | DIM1 dimethyladenosine transferase 1 homolog (S. cerevisiae) [Source:RGD Symbol;Acc:1311752]                | 2 |
| ENSRNOG000000032328 | 332.09   | 306.02   | 358.16   | 1.17  | 0.23  | 0.091745 | 0.2858974   | Diras2   | DIRAS family, GTP-binding RAS-like 2 [Source:RGD Symbol;Acc:1305580]                                        | 2 |
| ENSRNOG000000019779 | 31.28    | 31.25    | 31.31    | 1.00  | 0.00  | 1        | 1           | Disc1    | disrupted in schizophrenia 1 [Source:RGD Symbol;Acc:631359]                                                 | 1 |
| ENSRNOG000000026787 | 5169.84  | 4571.84  | 5767.83  | 1.26  | 0.34  | 9.56E-06 | 0.000148923 | Disp2    | dispatched homolog 2 (Drosophila) [Source:RGD Symbol;Acc:1309569]                                           | 1 |
| ENSRNOG000000020686 | 0.75     | 0.85     | 0.65     | 0.76  | -0.39 | 1        | 1           | Dkk1l1   | dickkopf-like 1 [Source:RGD Symbol;Acc:1563523]                                                             | 5 |
| ENSRNOG000000022635 | 631.85   | 514.96   | 748.74   | 1.45  | 0.54  | 9.56E-07 | 1.90E-05    | Dlg2     | discs, large homolog 2 (Drosophila) [Source:RGD Symbol;Acc:619895]                                          | 1 |
| ENSRNOG000000018526 | 5035.94  | 4773.58  | 5298.31  | 1.11  | 0.15  | 0.044281 | 0.169556918 | Dlg4     | discs, large homolog 4 (Drosophila) [Source:RGD Symbol;Acc:68424]                                           | 1 |
| ENSRNOG000000010721 | 108.95   | 125.30   | 92.60    | 0.74  | -0.44 | 0.030976 | 0.130208095 | Dlgap5   | discs, large (Drosophila) homolog-associated protein 5 [Source:RGD Symbol;Acc:1311247]                      | 2 |
| ENSRNOG000000019338 | 8.94     | 9.66     | 8.22     | 0.85  | -0.23 | 0.683201 | 0.939391222 | Dll3     | delta-like 3 (Drosophila) [Source:RGD Symbol;Acc:70953]                                                     | 3 |
| ENSRNOG000000023213 | 0.73     | 0.24     | 1.22     | 5.13  | 2.36  | 0.283193 | 0.588548363 | Dmrtb1   | DMRT-like family B with proline-rich C-terminal, 1 [Source:RGD Symbol;Acc:1560921]                          | 3 |
| ENSRNOG000000012223 | 13.64    | 11.05    | 16.22    | 1.47  | 0.55  | 0.199347 | 0.47708118  | Dnah7    | dynein, axonemal, heavy chain 7 [Source:RGD Symbol;Acc:621798]                                              | 3 |
| ENSRNOG000000000379 | 505.92   | 470.56   | 541.29   | 1.15  | 0.20  | 0.101876 | 0.306531226 | Dnajc12  | Dnaj (Hsp40) homolog, subfamily C, member 12 [Source:RGD Symbol;Acc:1591898]                                | 2 |
| ENSRNOG000000012851 | 4.94     | 4.54     | 5.34     | 1.18  | 0.24  | 0.737918 | 0.974570834 | Dnajc5b  | Dnaj (Hsp40) homolog, subfamily C, member 5 beta [Source:RGD Symbol;Acc:1562486]                            | 3 |
| ENSRNOG000000009291 | 26.11    | 39.45    | 12.76    | 0.32  | -1.63 | 1.24E-06 | 2.41E-05    | Dnase1l3 | deoxyribonuclease 1-like 3 [Source:RGD Symbol;Acc:620669]                                                   | 5 |
| ENSRNOG000000014933 | 1163.46  | 1229.09  | 1097.84  | 0.89  | -0.16 | 0.077693 | 0.253809503 | Dnttip1  | deoxynucleotidyltransferase, terminal, interacting protein 1 [Source:RGD Symbol;Acc:621627]                 | 2 |
| ENSRNOG00000005978  | 11.31    | 16.94    | 5.68     | 0.34  | -1.58 | 0.000514 | 0.004902605 | Doc2b    | double C2-like domains, beta [Source:RGD Symbol;Acc:620519]                                                 | 3 |
| ENSRNOG000000018029 | 59.25    | 64.42    | 54.08    | 0.84  | -0.25 | 0.278431 | 0.583857868 | Dock2g   | double C2-like domains, gamma [Source:RGD Symbol;Acc:1307473]                                               | 2 |
| ENSRNOG000000013321 | 3315.78  | 2872.86  | 3758.69  | 1.31  | 0.39  | 1.86E-06 | 3.45E-05    | Dock11   | dedicator of cytokinesis 11 [Source:RGD Symbol;Acc:1564707]                                                 | 2 |
| ENSRNOG000000004823 | 571.49   | 506.70   | 636.27   | 1.26  | 0.33  | 0.005085 | 0.032059813 | Dock4    | dedicator of cytokinesis 4 [Source:RGD Symbol;Acc:1561724]                                                  | 1 |
| ENSRNOG000000007412 | 165.41   | 209.17   | 121.65   | 0.58  | -0.78 | 1.07E-05 | 0.00016549  | Dok1     | docking protein 1 [Source:RGD Symbol;Acc:1309499]                                                           | 5 |
| ENSRNOG000000015679 | 9400.65  | 9150.64  | 9650.66  | 1.05  | 0.08  | 0.277272 | 0.582472937 | Dok4     | docking protein 4 [Source:RGD Symbol;Acc:1310084]                                                           | 2 |
| ENSRNOG000000017663 | 1428.24  | 1469.45  | 1387.02  | 0.94  | -0.08 | 0.351411 | 0.668347813 | Dolpp1   | dolichylidiphosphatase 1 [Source:RGD Symbol;Acc:13                                                          |   |

|                      |         |         |         |      |       |          |             |         |                                                                                                     |   |
|----------------------|---------|---------|---------|------|-------|----------|-------------|---------|-----------------------------------------------------------------------------------------------------|---|
| ENSRNOG000000042181  | 7.91    | 5.78    | 10.05   | 1.74 | 0.80  | 0.126153 | 0.352237147 | Dytn    | dystrotelin [Source:RGD Symbol;Acc:2320917]                                                         | 3 |
| ENSRNOG000000047741  | 73.11   | 101.54  | 44.67   | 0.44 | -1.18 | 5.18E-07 | 1.10E-05    | E2f2    | E2f transcription factor 2 [Source:RGD Symbol;Acc:1593939]                                          | 2 |
| ENSRNOG000000015708  | 741.21  | 796.48  | 685.93  | 0.86 | -0.22 | 0.045193 | 0.171799549 | E2f4    | E2f transcription factor 4, p107/p130-binding [Source:RGD Symbol;Acc:2322129]                       | 2 |
| ENSRNOG000000022537  | 12.90   | 22.54   | 3.25    | 0.14 | -2.79 | 5.95E-09 | 1.79E-07    | E2f8    | E2f transcription factor 8 [Source:RGD Symbol;Acc:1308091]                                          | 2 |
| ENSRNOG000000009224  | 776.02  | 869.68  | 682.35  | 0.78 | -0.35 | 0.001103 | 0.009205322 | E4f1    | E4f transcription factor 1 [Source:RGD Symbol;Acc:1596731]                                          | 2 |
| ENSRNOG000000028845  | 1415.56 | 1269.27 | 1561.84 | 1.23 | 0.30  | 0.000861 | 0.007533312 | Ebf1    | early B-cell factor 1 [Source:RGD Symbol;Acc:620953]                                                | 2 |
| ENSRNOG000000016102  | 1197.25 | 1087.74 | 1306.77 | 1.20 | 0.26  | 0.005965 | 0.036515386 | Ebf3    | early B-cell factor 3 [Source:RGD Symbol;Acc:1304956]                                               | 2 |
| ENSRNOG000000001715  | 3075.06 | 3024.96 | 3125.17 | 1.03 | 0.05  | 0.562214 | 0.84668362  | Ece2    | endothelin-converting enzyme 2 [Source:RGD Symbol;Acc:1303039]                                      | 1 |
| ENSRNOG000000019447  | 45.11   | 53.69   | 36.53   | 0.68 | -0.56 | 0.045834 | 0.173560443 | Ecel1   | endothelin converting enzyme-like 1 [Source:RGD Symbol;Acc:61806]                                   | 5 |
| ENSRNOG000000024365  | 54.40   | 66.09   | 42.71   | 0.65 | -0.63 | 0.011175 | 0.059728465 | Ect2    | epithelial cell transforming 2 [Source:RGD Symbol;Acc:1308524]                                      | 2 |
| ENSRNOG000000016272  | 5415.07 | 5588.05 | 5242.08 | 0.94 | -0.09 | 0.221627 | 0.509178545 | Edf1    | endothelial differentiation-related factor 1 [Source:RGD Symbol;Acc:1308073]                        | 2 |
| ENSRNOG000000014361  | 77.26   | 86.17   | 68.34   | 0.79 | -0.33 | 0.121501 | 0.345582395 | Edn1    | endothelin 1 [Source:RGD Symbol;Acc:2532]                                                           | 1 |
| ENSRNOG000000012721  | 355.19  | 419.18  | 291.20  | 0.69 | -0.53 | 0.000134 | 0.00155731  | Ednra   | endothelin receptor type A [Source:RGD Symbol;Acc:2535]                                             | 1 |
| ENSRNOG000000010997  | 946.89  | 856.25  | 1037.54 | 1.21 | 0.28  | 0.00353  | 0.023863627 | Ednrb   | endothelin receptor type B [Source:RGD Symbol;Acc:2536]                                             | 1 |
| ENSRNOG000000020075  | 5758.53 | 6036.81 | 5480.25 | 0.91 | -0.14 | 0.061908 | 0.216724574 | Eef1g   | eukaryotic translation elongation factor 1 gamma [Source:RGD Symbol;Acc:1302939]                    | 2 |
| ENSRNOG000000009782  | 258.51  | 240.82  | 276.21  | 1.15 | 0.20  | 0.253785 | 0.551543129 | Eefcab7 | EF-hand calcium binding domain 7 [Source:RGD Symbol;Acc:1561825]                                    | 2 |
| ENSRNOG000000020573  | 865.27  | 922.67  | 807.86  | 0.88 | -0.19 | 0.059595 | 0.210429854 | Efn1    | ephrin A1 [Source:RGD Symbol;Acc:620388]                                                            | 1 |
| ENSRNOG000000006877  | 1267.41 | 1430.64 | 1104.17 | 0.77 | -0.37 | 5.87E-05 | 0.000762102 | Efnb1   | ephrin B1 [Source:RGD Symbol;Acc:2540]                                                              | 2 |
| ENSRNOG000000014648  | 302.06  | 294.18  | 309.94  | 1.05 | 0.08  | 0.559435 | 0.84413152  | Efnb2   | ephrin B2 [Source:RGD Symbol;Acc:1309497]                                                           | 1 |
| ENSRNOG000000032707  | 23.16   | 24.96   | 21.37   | 0.86 | -0.22 | 0.514905 | 0.8149669   | Egf     | epidermal growth factor [Source:RGD Symbol;Acc:2542]                                                | 1 |
| ENSRNOG000000023908  | 56.45   | 51.22   | 61.68   | 1.20 | 0.27  | 0.216014 | 0.500998603 | Egfm1   | EGF-like and EMI domain containing 1 [Source:RGD Symbol;Acc:1307225]                                | 2 |
| ENSRNOG000000000436  | 8083.52 | 9311.01 | 6856.04 | 0.74 | -0.44 | 6.36E-09 | 1.15E-07    | Egfl8   | EGF-like-domain, multiple 8 [Source:RGD Symbol;Acc:1549706]                                         | 1 |
| ENSRNOG000000004332  | 77.88   | 97.71   | 58.04   | 0.59 | -0.75 | 0.000884 | 0.007679943 | Egfr    | epidermal growth factor receptor [Source:RGD Symbol;Acc:2543]                                       | 1 |
| ENSRNOG000000019422  | 480.81  | 554.30  | 407.32  | 0.73 | -0.44 | 0.000285 | 0.002996006 | Egr1    | early growth response 1 [Source:RGD Symbol;Acc:2544]                                                | 4 |
| ENSRNOG000000017828  | 112.07  | 103.86  | 120.28  | 1.16 | 0.21  | 0.254504 | 0.552240658 | Egr3    | early growth response 3 [Source:RGD Symbol;Acc:2545]                                                | 1 |
| ENSRNOG000000015719  | 4.92    | 4.22    | 5.61    | 1.33 | 0.41  | 0.479932 | 0.784779259 | Egr4    | early growth response 4 [Source:RGD Symbol;Acc:2546]                                                | 3 |
| ENSRNOG000000020788  | 1535.66 | 1779.12 | 1292.20 | 0.73 | -0.46 | 1.85E-07 | 4.26E-06    | Ehbp11  | EH domain binding protein 1-like 1 [Source:RGD Symbol;Acc:1563823]                                  | 2 |
| ENSRNOG000000031421  | 1760.68 | 1569.44 | 1951.93 | 1.24 | 0.31  | 0.000421 | 0.004148695 | Eif1a   | eukaryotic translation initiation factor 1A [Source:RGD Symbol;Acc:1306331]                         | 2 |
| ENSRNOG000000010301  | 479.04  | 450.53  | 507.56  | 1.13 | 0.17  | 0.176116 | 0.441277812 | Eif4e3  | eukaryotic translation initiation factor 4E family member 3 [Source:RGD Symbol;Acc:1586185]         | 2 |
| ENSRNOG000000013752  | 1627.13 | 1546.60 | 1707.65 | 1.10 | 0.14  | 0.088059 | 0.277620615 | Elavl3  | ELAV like neuron-specific RNA binding protein 3 [Source:RGD Symbol;Acc:628892]                      | 2 |
| ENSRNOG0000000011762 | 276.73  | 294.76  | 258.70  | 0.88 | -0.19 | 0.196098 | 0.467921336 | Elf1    | E74-like factor 1 [Source:RGD Symbol;Acc:620697]                                                    | 2 |
| ENSRNOG000000004367  | 326.84  | 418.56  | 235.11  | 0.56 | -0.83 | 6.33E-09 | 1.90E-07    | Elk3    | ELK3, member of ETS oncogene family [Source:RGD Symbol;Acc:1307764]                                 | 2 |
| ENSRNOG000000019824  | 648.61  | 698.90  | 598.31  | 0.86 | -0.22 | 0.049064 | 0.182650514 | Elf     | elongation factor RNA polymerase II [Source:RGD Symbol;Acc:1311121]                                 | 2 |
| ENSRNOG0000000043143 | 3434.31 | 3091.30 | 3777.33 | 1.22 | 0.29  | 0.00021  | 0.002306964 | Eml1    | echinoderm microtubule associated protein like 1 [Source:RGD Symbol;Acc:1306374]                    | 5 |
| ENSRNOG000000004207  | 299.76  | 246.89  | 352.64  | 1.43 | 0.51  | 0.000513 | 0.004902605 | Eml5    | echinoderm microtubule associated protein like 5 [Source:RGD Symbol;Acc:1303275]                    | 5 |
| ENSRNOG000000021104  | 1745.40 | 1790.41 | 1700.39 | 0.95 | -0.07 | 0.342856 | 0.657921336 | Emp3    | epithelial membrane protein 3 [Source:RGD Symbol;Acc:621094]                                        | 2 |
| ENSRNOG000000018631  | 36.42   | 29.89   | 42.96   | 1.44 | 0.52  | 0.059893 | 0.211254568 | Enkur   | enkurin, TRPC channel interacting protein [Source:RGD Symbol;Acc:1309839]                           | 3 |
| ENSRNOG000000004078  | 297.76  | 324.91  | 270.62  | 0.83 | -0.26 | 0.068116 | 0.230661135 | Eno3    | enolase 3, beta, muscle [Source:RGD Symbol;Acc:2555]                                                | 2 |
| ENSRNOG0000000047817 | 592.20  | 530.46  | 653.94  | 1.23 | 0.30  | 0.008355 | 0.047844659 | Enox1   | ecto-NOX disulfide-thiol exchanger 1 [Source:RGD Symbol;Acc:1306118]                                | 2 |
| ENSRNOG000000004089  | 1144.11 | 757.23  | 1531.00 | 2.02 | 1.02  | 7.25E-25 | 7.29E-23    | Enpp2   | ectonucleotide pyrophosphatase/phosphodiesterase 2 [Source:RGD Symbol;Acc:69298]                    | 1 |
| ENSRNOG000000024533  | 303.55  | 304.57  | 302.52  | 0.99 | -0.01 | 0.977702 | 1           | Eogt    | EGF domain-specific O-linked N-acetylglucosamine (GlcNAc) transferase [Source:RGD Symbol;Acc:13593] | 2 |
| ENSRNOG000000010037  | 909.07  | 874.36  | 943.78  | 1.08 | 0.11  | 0.242996 | 0.536601335 | Epb4.1  | erythrocyte membrane protein band 4.1 [Source:RGD Symbol;Acc:1564762]                               | 2 |
| ENSRNOG000000002538  | 172.45  | 143.99  | 200.92  | 1.40 | 0.48  | 0.006899 | 0.04140823  | Epb4.15 | erythrocyte membrane protein band 4.1 like 5 [Source:RGD Symbol;Acc:1311366]                        | 1 |
| ENSRNOG000000012346  | 5468.26 | 5760.18 | 5176.34 | 0.90 | -0.15 | 0.040331 | 0.158384761 | Epb4.12 | erythrocyte membrane protein band 4.1-like 2 [Source:RGD Symbol;Acc:1563977]                        | 2 |
| ENSRNOG000000015667  | 33.09   | 42.02   | 24.16   | 0.57 | -0.80 | 0.00914  | 0.051388323 | Epcam   | epithelial cell adhesion molecule [Source:RGD Symbol;Acc:621365]                                    | 3 |
| ENSRNOG000000013036  | 114.97  | 113.45  | 116.49  | 1.03 | 0.04  | 0.820694 | 1           | Epha8   | Eph receptor A8 [Source:RGD Symbol;Acc:708543]                                                      | 5 |
| ENSRNOG0000000007865 | 867.28  | 867.00  | 867.55  | 1.00 | 0.00  | 0.911373 | 1           | Ephb1   | Eph receptor B1 [Source:RGD Symbol;Acc:2556]                                                        | 1 |
| ENSRNOG000000012531  | 248.11  | 294.64  | 201.58  | 0.68 | -0.55 | 0.000669 | 0.00611276  | Ephb2   | Eph receptor B2 [Source:RGD Symbol;Acc:1564232]                                                     | 1 |
| ENSRNOG0000000031801 | 382.00  | 444.93  | 319.07  | 0.72 | -0.48 | 0.000569 | 0.005331737 | Ephb3   | Eph receptor B3 [Source:RGD Symbol;Acc:1305602]                                                     | 1 |
| ENSRNOG000000045952  | 317.61  | 407.69  | 227.53  | 0.56 | -0.84 | 8.52E-09 | 2.49E-07    | Ephb4   | EPH receptor B4 [Source:RGD Symbol;Acc:1583193]                                                     | 1 |
| ENSRNOG000000014367  | 2073.12 | 2198.92 | 1947.31 | 0.89 | -0.18 | 0.044664 | 0.170588174 | Ephb6   | Eph receptor B6 [Source:RGD Symbol;Acc:1306163]                                                     | 1 |
| ENSRNOG000000003515  | 1727.29 | 1799.40 | 1655.18 | 0.92 | -0.12 | 0.190728 | 0.469793435 | Ephx1   | epoxide hydrolase 1, microsomal (xenobiotic) [Source:RGD Symbol;Acc:2557]                           | 1 |
| ENSRNOG000000017286  | 98.73   | 129.53  | 67.93   | 0.52 | -0.93 | 1.34E-06 | 2.58E-05    | Ephx2   | epoxide hydrolase 2, cytoplasmic [Source:RGD Symbol;Acc:620732]                                     | 2 |
| ENSRNOG000000012619  | 27.29   | 40.05   | 14.53   | 0.36 | -1.46 | 4.89E-06 | 8.24E-05    | Epor    | erythropoietin receptor [Source:RGD Symbol;Acc:2560]                                                | 1 |
| ENSRNOG000000028908  | 32.65   | 29.75   | 35.54   | 1.19 | 0.26  | 0.398281 | 0.717516042 | Eppin   | epididymal peptidase inhibitor [Source:RGD Symbol;Acc:1597722]                                      | 2 |
| ENSRNOG000000018336  | 262.45  | 272.30  | 252.59  | 0.93 | -0.11 | 0.477212 | 0.72986794  | Eps8l2  | EPS8-like 2 [Source:RGD Symbol;Acc:1310912]                                                         | 2 |
| ENSRNOG000000006450  | 287.10  | 332.28  | 241.91  | 0.73 | -0.46 | 0.002938 | 0.020557506 | Erb2    | v-erb-b2 avian erythroblastic leukemia viral oncogene 2 [Source:RGD Symbol;Acc:2561]                | 1 |
| ENSRNOG000000014248  | 15.88   | 14.72   | 17.04   | 1.16 | 0.21  | 0.52931  | 0.828607955 | Erb4    | v-erb-b2 avian erythroblastic leukemia viral oncogene 4 [Source:RGD Symbol;Acc:620486]              | 1 |
| ENSRNOG000000009968  | 921.06  | 899.14  | 942.97  | 1.05 | 0.07  | 0.51201  | 0.812827852 | Erc8    | excision repair cross-complementation group 8 [Source:RGD Symbol;Acc:1311570]                       | 1 |
| ENSRNOG000000011448  | 555.48  | 538.48  | 572.48  | 1.06 | 0.09  | 0.52659  | 0.826653289 | Eri1    | exoribonuclease 1 [Source:RGD Symbol;Acc:1308378]                                                   | 2 |
| ENSRNOG000000009533  | 339.87  | 318.96  | 360.78  | 1.13 | 0.18  | 0.196883 | 0.473796579 | Erich3  | glutamate-rich 3 [Source:RGD Symbol;Acc:1593279]                                                    | 2 |
| ENSRNOG0000000012911 | 508.35  | 477.50  | 539.19  | 1.13 | 0.18  | 0.1791   | 0.445925285 | Erlin1  | ER lipid raft associated 1 [Source:RGD Symbol;Acc:1307058]                                          | 2 |
| ENSRNOG000000000335  | 15.47   | 27.10   | 3.84    | 0.14 | -2.82 | 2.03E-10 | 7.64E-09    | Ermapp  | erythroblast membrane-associated protein [Source:RGD Symbol;Acc:1309996]                            | 2 |
| ENSRNOG000000018974  | 10.94   | 11.28   | 10.60   | 0.94 | -0.09 | 0.987312 | 1           | Ern2    | endoplasmic reticulum to nucleus signaling 2 [Source:RGD Symbol;Acc:1308743]                        | 3 |
| ENSRNOG000000015921  | 42.85   | 45.90   | 39.79   | 0.87 | -0.21 | 0.372422 | 0.688540677 | Eso2    | establishment of sister chromatid cohesion N-acetyltransferase 2 [Source:RGD Symbol;Acc:1593313]    | 2 |
| ENSRNOG000000019358  | 8.63    | 7.96    | 9.29    | 1.17 | 0.22  | 0.617831 | 0.890018505 | Esr1    | estrogen receptor 1 [Source:RGD Symbol;Acc:2581]                                                    | 1 |
| ENSRNOG000000005343  | 5.92    | 6.81    | 5.04    | 0.74 | -0.43 | 0.510535 | 0.811640904 | Esr2    | estrogen receptor 2 (ER beta) [Source:RGD Symbol;Acc:2582]                                          | 4 |
| ENSRNOG000000022704  | 69.56   | 76.40   | 62.73   | 0.82 | -0.28 | 0.224144 | 0.513284788 | Esy13   | extended synaptotagmin-like protein 3 [Source:RGD Symbol;Acc:1561304]                               | 5 |
| ENSRNOG000000006867  | 1822.56 | 1669.87 | 1975.25 | 1.18 | 0.24  | 0.007118 | 0.042042115 | Etv1    | ets variant 1 [Source:RGD Symbol;Acc:1312007]                                                       | 1 |
| ENSRNOG000000018582  | 340.07  | 367.00  | 313.14  | 0.85 | -0.23 | 0.108634 | 0.321059755 | Exoc6   | exosome component 6 [Source:RGD Symbol;Acc:1309832]                                                 | 2 |
| ENSRNOG000000025115  | 10.77   | 8.32    | 13.21   | 1.59 | 0.67  | 0.137262 | 0.37406244  | Exph5   | exophilin 5 [Source:RGD Symbol;Acc:1560308]                                                         | 3 |
| ENSRNOG000000018524  | 1979.48 | 2076.91 | 1882.04 | 0.91 | -0.14 | 0.093218 | 0.288860242 | Ezr     | ezrin [Source:RGD Symbol;Acc:621161]                                                                | 1 |
| ENSRNOG000000048043  | 484.90  | 440.65  | 529.14  | 1.20 | 0.26  | 0.024465 | 0.109871293 | F2r     | coagulation factor II (thrombin) receptor [Source:RGD Symbol;Acc:2586]                              | 1 |
| ENSRNOG000000018003  | 75.27   | 70.16   | 80.37   | 1.15 | 0.20  | 0.449992 | 0.766094949 | F2r12   | coagulation factor II (thrombin) receptor-like 1 [Source:RGD Symbol;Acc:620866]                     | 4 |
| ENSRNOG000000018054  | 386.17  | 293.07  | 479.28  | 1.64 | 0.71  | 1.10E-07 | 2.62E-06    | F2r12   | coagulation factor II (thrombin) receptor-like 2 [Source:RGD Symbol;Acc:620872]                     | 7 |
| ENSRNOG0000000048186 | 25.36   | 23.74   | 26.98   | 1.14 | 0.18  | 0.669163 | 0.929461853 | F2r13   | coagulation factor II (thrombin) receptor-like 3 [Source:RGD Symbol;Acc:620872]                     | 6 |
| ENSRNOG000000045949  | 11.07   | 12.68   | 9.47    | 0.75 | -0.42 | 0.344362 | 0.65972579  | Faah    | fatty acid amide hydrolase [Source:RGD Symbol;Acc:61808]                                            | 1 |
| ENSRNOG000000020385  | 1956.98 | 2028.76 | 1885.20 | 0.93 | -0.11 | 0.218499 | 0.504480502 | Fads3   | fatty acid desaturase 3 [Source:RGD Symbol;Acc:628876]                                              | 5 |
| ENSRNOG000000013223  | 492.28  | 492.38  | 492.18  | 1.00 | 0.00  | 0.955298 | 1           | Fah     | fumarylacetoacetate hydrolase [Source:RGD Symbol;Acc:61932]                                         | 2 |
| ENSRNOG000000030463  | 228.02  | 214.37  | 241.66  | 1.13 | 0.17  | 0.318833 | 0.630848067 | Faim    | Fas apoptotic inhibitory molecule [Source:RGD Symbol;Acc:620572]                                    | 2 |
| ENSRNOG000000027540  | 277.16  | 227.44  | 326.89  | 1.44 | 0.52  | 0.000432 | 0.004230441 | Fam102b | family with sequence similarity 102, member B [Source:RGD Symbol;Acc:1310037]                       | 2 |
| ENSRNOG000000014886  | 930.42  | 909.31  | 951.52  | 1.05 | 0.07  | 0.632063 | 0.90185806  | Fam107b | family with sequence similarity 107, member B [Source:RGD Symbol;Acc:1561482]                       | 2 |
| ENSRNOG000000042522  | 85.11   | 98.50   | 71.73   | 0.73 | -0.46 | 0.035913 | 0.145419956 | Fam109b | family with sequence similarity 109, member B [Source:RGD Symbol;Acc:1586415]                       | 2 |
| ENSRNOG000000004417  | 481.77  | 549.57  | 413.96  | 0.75 | -0.41 | 0.000915 | 0.007903214 | Fam117a | family with sequence similarity 117, member A [Source:RGD Symbol;Acc:1561062]                       | 2 |
| ENSRNOG000000002285  |         |         |         |      |       |          |             |         |                                                                                                     |   |

|                      |          |          |          |      |        |          |             |           |                                                                                                             |   |
|----------------------|----------|----------|----------|------|--------|----------|-------------|-----------|-------------------------------------------------------------------------------------------------------------|---|
| ENSRNOG00000020518   | 16473.02 | 15574.87 | 17371.17 | 1.12 | 0.16   | 0.037748 | 0.151027885 | Fam189b   | family with sequence similarity 189, member B [Source:RGD Symbol;Acc:1306107]                               | 2 |
| ENSRNOG00000039807   | 1851.92  | 2157.27  | 1546.57  | 0.72 | -0.48  | 2.59E-08 | 6.91E-07    | Fam193b   | family with sequence similarity 193, member B [Source:RGD Symbol;Acc:1562335]                               | 2 |
| ENSRNOG00000005830   | 293.18   | 257.91   | 328.46   | 1.27 | 0.35   | 0.018638 | 0.089128396 | Fam19a4   | family with sequence similarity 19, (chemokine (C-C motif)-like), member A4 [Source:RGD Symbol;Acc:1597443] | 5 |
| ENSRNOG000000024605  | 651.88   | 639.39   | 664.38   | 1.04 | 0.06   | 0.650489 | 0.915973774 | Fam220a   | family with sequence similarity 220, member A [Source:RGD Symbol;Acc:1561923]                               | 2 |
| ENSRNOG00000001198   | 184.21   | 186.28   | 182.13   | 0.98 | -0.03  | 0.919015 | 1           | Fam222a   | family with sequence similarity 222, member A [Source:RGD Symbol;Acc:1565883]                               | 5 |
| ENSRNOG00000007888   | 55.96    | 64.05    | 47.86    | 0.75 | -0.42  | 0.110401 | 0.324502796 | Fam46b    | family with sequence similarity 46, member B [Source:RGD Symbol;Acc:1308967]                                | 2 |
| ENSRNOG000000015222  | 100.16   | 136.05   | 64.28    | 0.47 | -1.08  | 3.26E-07 | 7.15E-06    | Fam46c    | family with sequence similarity 46, member C [Source:RGD Symbol;Acc:1359446]                                | 2 |
| ENSRNOG000000020261  | 533.18   | 520.66   | 545.70   | 1.05 | 0.07   | 0.535045 | 0.83315454  | Fam53c    | family with sequence similarity 53, member C [Source:RGD Symbol;Acc:1593851]                                | 2 |
| ENSRNOG000000021131  | 1035.86  | 1088.83  | 982.89   | 0.90 | -0.15  | 0.142678 | 0.384585757 | Fam63a    | family with sequence similarity 63, member A [Source:RGD Symbol;Acc:1559660]                                | 2 |
| ENSRNOG000000029371  | 0.13     | 0.27     | 0.00     | 0.00 | #NAME? | 0.964516 | 1           | Fam71a    | family with sequence similarity 71, member A [Source:RGD Symbol;Acc:1561646]                                | 3 |
| ENSRNOG000000024863  | 474.36   | 460.47   | 488.26   | 1.06 | 0.08   | 0.547216 | 0.834197123 | Fam76b    | family with sequence similarity 76, member B [Source:RGD Symbol;Acc:1311077]                                | 2 |
| ENSRNOG000000015794  | 39.02    | 35.87    | 42.18    | 1.18 | 0.23   | 0.453103 | 0.769305137 | Fam83d    | family with sequence similarity 83, member D [Source:RGD Symbol;Acc:1565583]                                | 2 |
| ENSRNOG000000030264  | 556.68   | 587.90   | 525.45   | 0.89 | -0.16  | 0.173461 | 0.4365936   | Fam83h    | family with sequence similarity 83, member H [Source:RGD Symbol;Acc:1305866]                                | 2 |
| ENSRNOG000000019022  | 1210.71  | 1254.49  | 1166.93  | 0.93 | -0.10  | 0.249861 | 0.546289675 | Fam89a    | family with sequence similarity 89, member A [Source:RGD Symbol;Acc:1309879]                                | 5 |
| ENSRNOG000000024239  | 5079.89  | 5109.99  | 5049.79  | 0.99 | -0.02  | 0.847103 | 1           | Fam89b    | family with sequence similarity 89, member B [Source:RGD Symbol;Acc:1311544]                                | 2 |
| ENSRNOG000000024475  | 182.10   | 193.06   | 171.14   | 0.89 | -0.17  | 0.330431 | 0.643038682 | Fancd2    | Fanconi anemia, complementation group D2 [Source:RGD Symbol;Acc:1303172]                                    | 2 |
| ENSRNOG000000017597  | 4.97     | 4.05     | 5.88     | 1.45 | 0.54   | 0.479255 | 0.784099202 | Fbp1      | fructose-1,6-bisphosphatase 1 [Source:RGD Symbol;Acc:2595]                                                  | 2 |
| ENSRNOG000000017637  | 165.84   | 162.43   | 169.25   | 1.04 | 0.06   | 0.805026 | 1           | Fbp2      | fructose-1,6-bisphosphatase 2 [Source:RGD Symbol;Acc:620930]                                                | 5 |
| ENSRNOG000000042728  | 578.79   | 608.23   | 549.36   | 0.90 | -0.15  | 0.219608 | 0.506090825 | Fbrs      | fibrosin [Source:RGD Symbol;Acc:1594591]                                                                    | 2 |
| ENSRNOG000000022248  | 1296.64  | 1208.34  | 1384.95  | 1.15 | 0.20   | 0.028935 | 0.769305137 | Fbx116    | F-box and leucine-rich repeat protein 16 [Source:RGD Symbol;Acc:1309127]                                    | 2 |
| ENSRNOG000000018986  | 1573.14  | 1652.55  | 1493.73  | 0.90 | -0.15  | 0.108975 | 0.321661601 | Fbx119    | F-box and leucine-rich repeat protein 19 [Source:RGD Symbol;Acc:1310989]                                    | 2 |
| ENSRNOG000000027099  | 1123.66  | 1018.93  | 1228.39  | 1.21 | 0.27   | 0.005503 | 0.034159159 | Fbx12     | F-box and leucine-rich repeat protein 2 [Source:RGD Symbol;Acc:1562243]                                     | 5 |
| ENSRNOG000000022702  | 1526.99  | 1541.95  | 1512.03  | 0.98 | -0.03  | 0.696745 | 0.94575956  | Fbxo22    | F-box protein 22 [Source:RGD Symbol;Acc:1306664]                                                            | 2 |
| ENSRNOG000000017053  | 93.33    | 85.09    | 101.57   | 1.19 | 0.26   | 0.253728 | 0.551507597 | Fbxo36    | F-box protein 36 [Source:RGD Symbol;Acc:1307870]                                                            | 2 |
| ENSRNOG000000024077  | 68.55    | 76.02    | 61.08    | 0.80 | -0.32  | 0.182576 | 0.450483325 | Fbxo5     | F-box protein 5 [Source:RGD Symbol;Acc:1309405]                                                             | 2 |
| ENSRNOG000000008214  | 2986.58  | 2973.63  | 2999.53  | 1.01 | 0.01   | 0.883276 | 1           | Fbxo9     | f-box protein 9 [Source:RGD Symbol;Acc:1310374]                                                             | 2 |
| ENSRNOG000000015334  | 400.56   | 365.84   | 435.27   | 1.19 | 0.25   | 0.061314 | 0.215289447 | Fcho2     | FCH domain only 2 [Source:RGD Symbol;Acc:1565396]                                                           | 2 |
| ENSRNOG000000012123  | 348.19   | 341.91   | 354.48   | 1.04 | 0.05   | 0.719957 | 0.961990345 | Fdx1      | ferredoxin 1 [Source:RGD Symbol;Acc:62036]                                                                  | 2 |
| ENSRNOG000000018053  | 1681.55  | 1728.82  | 1634.28  | 0.95 | -0.08  | 0.360896 | 0.676737046 | Fech      | ferrochelataase [Source:RGD Symbol;Acc:1307556]                                                             | 2 |
| ENSRNOG00000001806   | 1.47     | 2.01     | 0.93     | 0.46 | -1.11  | 0.372299 | 0.688540677 | Fetub     | fetuin B [Source:RGD Symbol;Acc:69293]                                                                      | 3 |
| ENSRNOG000000006075  | 15696.32 | 15306.53 | 16086.12 | 1.05 | 0.07   | 0.347322 | 0.663704271 | Fez1      | fasciculation and elongation protein zeta 1 (zyglin I) [Source:RGD Symbol;Acc:619708]                       | 2 |
| ENSRNOG000000006701  | 112.49   | 87.21    | 137.76   | 1.58 | 0.66   | 0.001135 | 0.009424239 | Fgd6      | FYVE, RhoGEF and PH domain containing 6 [Source:RGD Symbol;Acc:1565609]                                     | 2 |
| ENSRNOG0000000042753 | 11156.15 | 9321.26  | 12991.04 | 1.39 | 0.48   | 4.39E-10 | 1.57E-08    | Fgf13     | fibroblast growth factor 13 [Source:RGD Symbol;Acc:620164]                                                  | 5 |
| ENSRNOG000000017392  | 17.80    | 14.48    | 21.12    | 1.46 | 0.54   | 0.144817 | 0.388508199 | Fgf2      | fibroblast growth factor 2 [Source:RGD Symbol;Acc:2609]                                                     | 1 |
| ENSRNOG000000013119  | 436.57   | 378.55   | 494.59   | 1.31 | 0.39   | 0.002478 | 0.017976592 | Fgfr10p   | Fgfr1 oncogene partner [Source:RGD Symbol;Acc:1583370]                                                      | 2 |
| ENSRNOG000000025074  | 1.87     | 2.34     | 1.40     | 0.60 | -0.75  | 0.561648 | 0.846180075 | Fgg       | fibrinogen gamma chain [Source:RGD Symbol;Acc:2613]                                                         | 5 |
| ENSRNOG000000009735  | 0.25     | 0.24     | 0.27     | 1.12 | 0.16   | 1        | 1           | Fibcd1    | fibrinogen C domain containing 1 [Source:RGD Symbol;Acc:1309097]                                            | 3 |
| ENSRNOG000000003587  | 9.20     | 9.66     | 8.74     | 0.90 | -0.14  | 0.817142 | 1           | Figf      | c-fos induced growth factor [Source:RGD Symbol;Acc:620695]                                                  | 2 |
| ENSRNOG000000004440  | 31.88    | 32.45    | 31.32    | 0.97 | -0.05  | 0.779297 | 0.998033954 | Fign1     | fidgetin-like 1 [Source:RGD Symbol;Acc:1307112]                                                             | 2 |
| ENSRNOG000000011521  | 1024.80  | 1069.27  | 980.33   | 0.92 | -0.13  | 0.208729 | 0.490632172 | Filip1    | filamin A interacting protein 1 [Source:RGD Symbol;Acc:628597]                                              | 2 |
| ENSRNOG0000000047143 | 8140.32  | 7788.17  | 8492.46  | 1.09 | 0.12   | 0.104911 | 0.313317387 | Fkbp1b    | FK506 binding protein 1B [Source:RGD Symbol;Acc:61835]                                                      | 2 |
| ENSRNOG000000022523  | 1026.04  | 995.01   | 1057.08  | 1.06 | 0.09   | 0.393632 | 0.711661846 | Fkbp5     | FK506 binding protein 5 [Source:RGD Symbol;Acc:1309155]                                                     | 1 |
| ENSRNOG000000000432  | 700.86   | 737.04   | 664.69   | 0.90 | -0.15  | 0.164201 | 0.42100784  | Fkbp1     | FK506 binding protein-like [Source:RGD Symbol;Acc:1303227]                                                  | 1 |
| ENSRNOG00000000826   | 9453.65  | 9559.84  | 9347.46  | 0.98 | -0.03  | 0.673506 | 0.932535621 | Flot1     | flotillin 1 [Source:RGD Symbol;Acc:70991]                                                                   | 6 |
| ENSRNOG0000000099681 | 9347.58  | 8960.22  | 9734.94  | 1.09 | 0.12   | 0.101542 | 0.30590768  | Flot2     | flotillin 2 [Source:RGD Symbol;Acc:70993]                                                                   | 2 |
| ENSRNOG000000003207  | 1883.81  | 1929.01  | 1838.61  | 0.95 | -0.07  | 0.426672 | 0.746863021 | Fmnl1     | formin-like 1 [Source:RGD Symbol;Acc:1311042]                                                               | 5 |
| ENSRNOG000000049851  | 2.57     | 2.83     | 2.31     | 0.82 | -0.29  | 0.884846 | 1           | Fmo6      | flavin containing monooxygenase 6 [Source:RGD Symbol;Acc:1359491]                                           | 1 |
| ENSRNOG000000011900  | 813.22   | 790.72   | 835.71   | 1.06 | 0.08   | 0.488278 | 0.792559291 | Fmr1      | fragile X mental retardation 1 [Source:RGD Symbol;Acc:2623]                                                 | 3 |
| ENSRNOG000000013798  | 105.08   | 108.05   | 102.11   | 0.95 | -0.08  | 0.754008 | 0.983702988 | Fnbp1     | formin binding protein 1-like [Source:RGD Symbol;Acc:1305386]                                               | 2 |
| ENSRNOG000000008015  | 168.48   | 179.76   | 157.20   | 0.87 | -0.19  | 0.251044 | 0.548020635 | Fos       | FBJ osteosarcoma oncogene [Source:RGD Symbol;Acc:2626]                                                      | 5 |
| ENSRNOG0000000046667 | 22.10    | 24.98    | 19.21    | 0.77 | -0.38  | 0.295077 | 0.601223747 | Fosb      | FBJ osteosarcoma oncogene B [Source:RGD Symbol;Acc:1308198]                                                 | 4 |
| ENSRNOG000000005936  | 132.62   | 145.06   | 120.17   | 0.83 | -0.27  | 0.159865 | 0.414262351 | Foxm1     | forkhead box M1 [Source:RGD Symbol;Acc:61807]                                                               | 2 |
| ENSRNOG000000010870  | 0.49     | 0.24     | 0.74     | 3.11 | 1.64   | 0.693096 | 0.943449877 | Foxn1     | forkhead box N1 [Source:RGD Symbol;Acc:3970]                                                                | 1 |
| ENSRNOG000000000299  | 536.09   | 536.31   | 535.86   | 1.00 | 0.00   | 0.907929 | 1           | Foxo3     | forkhead box O3 [Source:RGD Symbol;Acc:1309196]                                                             | 2 |
| ENSRNOG000000031331  | 2.78     | 3.88     | 1.69     | 0.44 | -1.20  | 0.152114 | 0.402199704 | Fpr2      | formyl peptide receptor 2 [Source:RGD Symbol;Acc:1584013]                                                   | 1 |
| ENSRNOG000000045543  | 145.12   | 145.96   | 144.29   | 0.99 | -0.02  | 1        | 1           | Frat2     | frequently rearranged in advanced T-cell lymphomas 2 [Source:RGD Symbol;Acc:1591882]                        | 5 |
| ENSRNOG000000007764  | 343.44   | 338.76   | 348.11   | 1.03 | 0.04   | 0.770499 | 0.992943861 | Frm4b     | FERM domain containing 4B [Source:RGD Symbol;Acc:620172]                                                    | 5 |
| ENSRNOG0000000004118 | 609.81   | 473.93   | 745.68   | 1.57 | 0.65   | 6.86E-09 | 2.04E-07    | Frm4p     | FERM and PDZ domain containing 4 [Source:RGD Symbol;Acc:1566031]                                            | 1 |
| ENSRNOG000000019278  | 2.57     | 3.12     | 2.02     | 0.65 | -0.63  | 0.604308 | 0.879396219 | Fsd2      | fibronectin type III and SPRY domain containing 2 [Source:RGD Symbol;Acc:1305167]                           | 3 |
| ENSRNOG000000016783  | 0.92     | 1.83     | 0.00     | 0.00 | #NAME? | 0.018249 | 0.087626364 | Fshr      | follicle stimulating hormone receptor [Source:RGD Symbol;Acc:2632]                                          | 3 |
| ENSRNOG000000002746  | 13849.31 | 12651.03 | 15047.59 | 1.19 | 0.25   | 0.002725 | 0.006535436 | Fstl1     | follicle-stimulating like 1 [Source:MGI Symbol;Acc:MGI:102793]                                              | 1 |
| ENSRNOG000000020843  | 2205.02  | 2323.04  | 2086.99  | 0.90 | -0.15  | 0.054747 | 0.198257157 | Ftl1      | ferritin light chain 1 [Source:RGD Symbol;Acc:61813]                                                        | 2 |
| ENSRNOG000000016469  | 6045.00  | 6032.70  | 6057.31  | 1.00 | 0.01   | 0.970737 | 1           | Fxyd2     | FXYD domain-containing ion transport regulator 2 [Source:RGD Symbol;Acc:2173]                               | 5 |
| ENSRNOG000000016412  | 2265.51  | 2642.77  | 1888.24  | 0.71 | -0.49  | 6.92E-09 | 2.06E-07    | Fxyd6     | FXYD domain-containing ion transport regulator 6 [Source:RGD Symbol;Acc:69315]                              | 2 |
| ENSRNOG000000005096  | 3705.50  | 3684.34  | 3726.67  | 1.01 | 0.02   | 0.826359 | 1           | Fyn       | FYN proto-oncogene, Src family tyrosine kinase [Source:RGD Symbol;Acc:2641]                                 | 2 |
| ENSRNOG0000000004232 | 137.31   | 140.35   | 134.27   | 0.96 | -0.06  | 0.779366 | 0.998039819 | G2e3      | G2/M-phase specific E3 ubiquitin protein ligase [Source:RGD Symbol;Acc:1310263]                             | 1 |
| ENSRNOG0000000008498 | 32930.46 | 32212.84 | 33648.09 | 1.04 | 0.06   | 0.435629 | 0.754534886 | Gabara1p1 | GABA(A) receptor-associated protein like 1 [Source:RGD Symbol;Acc:1596143]                                  | 1 |
| ENSRNOG000000000774  | 22165.88 | 20651.81 | 23679.95 | 1.15 | 0.20   | 0.011852 | 0.062474936 | Gabbr1    | gamma-aminobutyric acid (GABA) B receptor 1 [Source:RGD Symbol;Acc:621537]                                  | 1 |
| ENSRNOG0000000008431 | 6972.11  | 5535.27  | 8048.95  | 1.45 | 0.54   | 3.44E-13 | 1.71E-11    | Gabra2    | gamma-aminobutyric acid (GABA) B receptor 2 [Source:RGD Symbol;Acc:619864]                                  | 1 |
| ENSRNOG000000002349  | 973.65   | 709.52   | 1237.77  | 1.74 | 0.80   | 5.19E-16 | 3.20E-14    | Gabra2    | gamma-aminobutyric acid (GABA) A receptor, alpha 2 [Source:RGD Symbol;Acc:61856]                            | 2 |
| ENSRNOG000000002336  | 31.83    | 24.89    | 38.78    | 1.56 | 0.64   | 0.036489 | 0.147302984 | Gabra4    | gamma-aminobutyric acid (GABA) A receptor, alpha 4 [Source:RGD Symbol;Acc:621670]                           | 1 |
| ENSRNOG000000003569  | 3.81     | 3.08     | 4.54     | 1.47 | 0.56   | 0.468717 | 0.780237584 | Gabra6    | gamma-aminobutyric acid (GABA) A receptor, alpha 6 [Source:RGD Symbol;Acc:61861]                            | 1 |
| ENSRNOG000000002327  | 2.98     | 1.56     | 4.40     | 2.81 | 1.49   | 0.054458 | 0.1974858   | Gabbr1    | gamma-aminobutyric acid (GABA) A receptor, beta 1 [Source:RGD Symbol;Acc:2649]                              | 6 |
| ENSRNOG000000003680  | 75.51    | 56.30    | 94.73    | 1.68 | 0.75   | 0.000438 | 0.004288566 | Gabbr2    | gamma-aminobutyric acid (GABA) A receptor, beta 2 [Source:RGD Symbol;Acc:2650]                              | 1 |
| ENSRNOG000000014938  | 651.87   | 468.35   | 835.39   | 1.78 | 0.83   | 5.06E-14 | 2.72E-12    | Gabbr3    | gamma-aminobutyric acid (GABA) A receptor, beta 3 [Source:RGD Symbol;Acc:2651]                              | 1 |
| ENSRNOG000000016385  | 54.23    | 66.07    | 42.39    | 0.64 | -0.64  | 0.016746 | 0.082078303 | Gabbrd    | gamma-aminobutyric acid (GABA) A receptor, delta [Source:RGD Symbol;Acc:61901]                              | 4 |
| ENSRNOG000000003241  | 2571.71  | 2256.83  | 2886.59  | 1.28 | 0.36   | 1.64E-05 | 0.000243316 | Gabrg2    | gamma-aminobutyric acid (GABA) A receptor, gamma 2 [Source:RGD Symbol;Acc:61966]                            | 1 |
| ENSRNOG000000        |          |          |          |      |        |          |             |           |                                                                                                             |   |

|                      |          |          |          |       |       |          |             |          |                                                                                                                        |   |
|----------------------|----------|----------|----------|-------|-------|----------|-------------|----------|------------------------------------------------------------------------------------------------------------------------|---|
| ENSRNOG00000007932   | 0.65     | 0.56     | 0.74     | 1.33  | 0.41  | 1        | 1           | Gcm1     | glial cells missing homolog 1 (Drosophila) [Source:RGD Symbol;Acc:61852]                                               | 3 |
| ENSRNOG000000050534  | 241.11   | 258.38   | 223.85   | 0.87  | -0.21 | 0.19998  | 0.477885231 | Gcnt1    | glucosaminyl (N-acetyl) transferase 1, core 2 [Source:RGD Symbol;Acc:621370]                                           | 2 |
| ENSRNOG000000023778  | 2184.91  | 1866.52  | 2503.29  | 1.34  | 0.42  | 5.91E-07 | 1.23E-05    | Gcnt2    | glucosaminyl (N-acetyl) transferase 2, l-branching enzyme [Source:RGD Symbol;Acc:1303198]                              | 5 |
| ENSRNOG000000012819  | 0.49     | 0.24     | 0.75     | 3.12  | 1.64  | 0.693063 | 0.943449877 | Gdnf     | glial cell derived neurotrophic factor [Source:RGD Symbol;Acc:2677]                                                    | 4 |
| ENSRNOG000000004667  | 48.99    | 50.58    | 47.40    | 0.94  | -0.09 | 0.790516 | 1           | Ggen1    | GEN1 Holliday junction 5' flap endonuclease [Source:RGD Symbol;Acc:1559792]                                            | 2 |
| ENSRNOG000000002919  | 4087.32  | 517.22   | 7657.42  | 14.80 | 3.89  | 0        | 0           | Gfap     | glial fibrillary acidic protein [Source:RGD Symbol;Acc:2679]                                                           | 7 |
| ENSRNOG000000014010  | 2588.05  | 2632.23  | 2543.87  | 0.97  | -0.05 | 0.51888  | 0.819279854 | Gfra2    | GDNF family receptor alpha 2 [Source:RGD Symbol;Acc:61809]                                                             | 1 |
| ENSRNOG000000020309  | 2904.66  | 2782.24  | 3027.08  | 1.09  | 0.12  | 0.124792 | 0.349737625 | Gfra3    | GDNF family receptor alpha 3 [Source:RGD Symbol;Acc:620502]                                                            | 3 |
| ENSRNOG000000019179  | 1347.57  | 1279.58  | 1415.56  | 1.11  | 0.15  | 0.128132 | 0.355730962 | Ggta1    | glycoprotein, alpha-galactosyltransferase 1 [Source:RGD Symbol;Acc:629476]                                             | 5 |
| ENSRNOG000000011207  | 3980.86  | 7641.31  | 320.41   | 0.04  | -4.58 | 0        | 0           | Gh1      | growth hormone 1 [Source:RGD Symbol;Acc:2686]                                                                          | 1 |
| ENSRNOG000000015654  | 988.33   | 858.57   | 1118.09  | 1.30  | 0.38  | 9.83E-05 | 0.001185358 | Ghr      | growth hormone receptor [Source:RGD Symbol;Acc:2687]                                                                   | 1 |
| ENSRNOG000000011808  | 5.68     | 10.36    | 1.00     | 0.10  | -3.38 | 2.06E-06 | 3.78E-05    | Ghrrh    | growth hormone releasing hormone receptor [Source:RGD Symbol;Acc:2688]                                                 | 1 |
| ENSRNOG000000024119  | 14.57    | 13.16    | 15.99    | 1.22  | 0.28  | 0.557348 | 0.842191496 | Ghshr    | growth hormone secretagogue receptor [Source:RGD Symbol;Acc:621397]                                                    | 3 |
| ENSRNOG000000001410  | 957.78   | 1052.94  | 862.63   | 0.82  | -0.29 | 0.005567 | 0.034452114 | Gigyf1   | GRB10 interacting GYF protein 1 [Source:RGD Symbol;Acc:1309933]                                                        | 2 |
| ENSRNOG000000000805  | 1003.52  | 1087.56  | 919.49   | 0.85  | -0.24 | 0.021589 | 0.099614885 | Gja1     | gap junction protein, alpha 1 [Source:RGD Symbol;Acc:2690]                                                             | 1 |
| ENSRNOG000000014372  | 1.22     | 1.30     | 1.14     | 0.88  | -0.19 | 1        | 1           | Gjb3     | gap junction protein, beta 3 [Source:RGD Symbol;Acc:2695]                                                              | 3 |
| ENSRNOG000000011513  | 2267.99  | 2174.28  | 2361.71  | 1.09  | 0.12  | 0.17246  | 0.43507078  | Gla      | galactosidase, alpha [Source:RGD Symbol;Acc:1589721]                                                                   | 1 |
| ENSRNOG000000014838  | 203.91   | 203.59   | 204.23   | 1.00  | 0.00  | 0.978345 | 1           | Glipr2   | GLI pathogenesis-related 2 [Source:RGD Symbol;Acc:1583669]                                                             | 2 |
| ENSRNOG000000013588  | 2.40     | 2.39     | 2.40     | 1.01  | 0.01  | 1        | 1           | G1ra1    | glycine receptor, alpha 1 subunit [Source:MGI Symbol;Acc:MGI:95747]                                                    | 1 |
| ENSRNOG000000049792  | 0.13     | 0.00     | 0.27     | Inf   | 1     | 1        | 1           | G1ra3    | glycine receptor, alpha 3 subunit [Source:MGI Symbol;Acc:MGI:95749]                                                    | 1 |
| ENSRNOG000000002391  | 2.17     | 1.27     | 3.07     | 2.41  | 1.27  | 0.187399 | 0.458935734 | G1ra4    | glycine receptor, alpha 4 [Source:RGD Symbol;Acc:1564103]                                                              | 1 |
| ENSRNOG000000010199  | 4535.22  | 3997.46  | 5072.98  | 1.27  | 0.34  | 1.05E-05 | 0.000162786 | G1rb     | glycine receptor, beta [Source:RGD Symbol;Acc:2706]                                                                    | 1 |
| ENSRNOG0000000038427 | 57.87    | 51.07    | 64.67    | 1.27  | 0.34  | 0.126887 | 0.353723097 | Gm1043   | predicted gene 1043 [Source:MGI Symbol;Acc:MGI:2685889]                                                                | 2 |
| ENSRNOG000000027257  | 644.29   | 688.15   | 600.43   | 0.87  | -0.20 | 0.076137 | 0.249968411 | Gmp1     | Gem-interacting protein [Source:RGD Symbol;Acc:1565577]                                                                | 2 |
| ENSRNOG000000018782  | 315.07   | 299.69   | 330.45   | 1.10  | 0.14  | 0.327431 | 0.63970781  | Gmnn     | geminin [Source:RGD Symbol;Acc:1308137]                                                                                | 2 |
| ENSRNOG000000014840  | 2410.29  | 2142.73  | 2677.84  | 1.25  | 0.32  | 0.000114 | 0.001350121 | Gna14    | guanine nucleotide binding protein, alpha 14 [Source:RGD Symbol;Acc:1308122]                                           | 5 |
| ENSRNOG000000010440  | 2726.26  | 2466.69  | 2985.84  | 1.21  | 0.28  | 0.000607 | 0.005624156 | Gna16    | guanine nucleotide binding protein, alpha stimulating, olfactory type [Source:RGD Symbol;Acc:2715]                     | 5 |
| ENSRNOG000000019482  | 8897.62  | 7277.92  | 10517.33 | 1.45  | 0.53  | 1.03E-12 | 4.81E-11    | Gnao1    | guanine nucleotide binding protein (G protein), alpha activating activity polypeptide O [Source:RGD Symbol;Acc:628732] | 7 |
| ENSRNOG000000014183  | 1031.85  | 856.74   | 1206.95  | 1.41  | 0.49  | 2.64E-07 | 5.93E-06    | Gnaq     | guanine nucleotide binding protein (G protein), q polypeptide [Source:RGD Symbol;Acc:620770]                           | 7 |
| ENSRNOG000000001313  | 1532.01  | 1462.62  | 1601.41  | 1.09  | 0.13  | 0.128962 | 0.357680346 | Gnaz     | guanine nucleotide binding protein (G protein), alpha z polypeptide [Source:RGD Symbol;Acc:2717]                       | 1 |
| ENSRNOG000000001409  | 5759.53  | 6214.69  | 5304.37  | 0.85  | -0.23 | 0.003102 | 0.021409739 | Gnb2     | guanine nucleotide binding protein (G protein), beta polypeptide 2 [Source:RGD Symbol;Acc:69319]                       | 2 |
| ENSRNOG000000002390  | 6061.73  | 6629.15  | 5494.32  | 0.83  | -0.27 | 0.000355 | 0.003579062 | Gnb2l1   | guanine nucleotide binding protein (G protein), beta polypeptide 2 like 1 [Source:RGD Symbol;Acc:69229]                | 1 |
| ENSRNOG000000015541  | 99.84    | 111.56   | 88.12    | 0.79  | -0.34 | 0.094665 | 0.291751976 | Gnb3     | guanine nucleotide binding protein (G protein), beta polypeptide 3 [Source:RGD Symbol;Acc:708344]                      | 6 |
| ENSRNOG000000011070  | 744.91   | 650.71   | 839.11   | 1.29  | 0.37  | 0.000631 | 0.005813365 | Gnb4     | guanine nucleotide binding protein (G protein), beta polypeptide 4 [Source:RGD Symbol;Acc:1359321]                     | 5 |
| ENSRNOG0000000048980 | 933.92   | 877.55   | 990.28   | 1.13  | 0.17  | 0.08495  | 0.270332962 | Gng2     | guanine nucleotide binding protein (G protein), gamma 2 [Source:MGI Symbol;Acc:MGI:102705]                             | 5 |
| ENSRNOG0000000039562 | 4.61     | 5.26     | 3.96     | 0.75  | -0.41 | 0.559053 | 0.843796878 | GNG5     | Guanine nucleotide-binding protein subunit gamma [Source:UniProtKB/TrEMBL;Acc:F22378]                                  | 6 |
| ENSRNOG000000015051  | 445.66   | 467.02   | 424.29   | 0.91  | -0.14 | 0.285836 | 0.591479467 | Golga7b  | golgin A7 family, member B [Source:RGD Symbol;Acc:1583839]                                                             | 2 |
| ENSRNOG000000025317  | 936.31   | 923.25   | 949.37   | 1.03  | 0.04  | 0.743429 | 0.977510678 | Gpatch11 | G patch domain containing 11 [Source:RGD Symbol;Acc:1311424]                                                           | 2 |
| ENSRNOG000000018969  | 197.52   | 173.49   | 221.55   | 1.28  | 0.35  | 0.049629 | 0.184199298 | Gpatch4  | G patch domain containing 4 [Source:RGD Symbol;Acc:1311086]                                                            | 2 |
| ENSRNOG000000026455  | 2017.89  | 1884.21  | 2151.57  | 1.14  | 0.19  | 0.024423 | 0.10977375  | Gpd14    | glycerol-3-phosphate dehydrogenase 1-like [Source:RGD Symbol;Acc:1560123]                                              | 5 |
| ENSRNOG000000021020  | 4.89     | 5.73     | 4.04     | 0.71  | -0.50 | 0.483628 | 0.788656401 | Gpha2    | glycoprotein hormone alpha 2 [Source:RGD Symbol;Acc:621748]                                                            | 3 |
| ENSRNOG000000024517  | 4.99     | 5.13     | 4.86     | 0.95  | -0.08 | 1        | 1           | Gpr119   | G protein-coupled receptor 119 [Source:RGD Symbol;Acc:727808]                                                          | 3 |
| ENSRNOG000000023536  | 50.65    | 54.35    | 46.95    | 0.86  | -0.21 | 0.422445 | 0.742404145 | Gpr133   | G protein-coupled receptor 133 [Source:RGD Symbol;Acc:1594795]                                                         | 2 |
| ENSRNOG000000014793  | 1157.29  | 936.06   | 1378.52  | 1.47  | 0.56  | 7.15E-09 | 2.12E-07    | Gpr149   | G protein-coupled receptor 149 [Source:RGD Symbol;Acc:619890]                                                          | 3 |
| ENSRNOG000000026944  | 87.91    | 94.30    | 81.52    | 0.86  | -0.21 | 0.365079 | 0.681407719 | Gpr150   | G protein-coupled receptor 150 [Source:RGD Symbol;Acc:1564729]                                                         | 2 |
| ENSRNOG000000027103  | 33.63    | 30.94    | 36.33    | 1.17  | 0.23  | 0.463006 | 0.778726885 | Gpr151   | G protein-coupled receptor 151 [Source:RGD Symbol;Acc:727873]                                                          | 2 |
| ENSRNOG000000009487  | 44.99    | 40.09    | 49.90    | 1.24  | 0.32  | 0.268973 | 0.571319156 | Gpr160   | G protein-coupled receptor 160 [Source:RGD Symbol;Acc:1560200]                                                         | 5 |
| ENSRNOG000000016143  | 1812.24  | 1810.24  | 1814.23  | 1.00  | 0.00  | 0.94473  | 1           | Gpr162   | G protein-coupled receptor 162 [Source:RGD Symbol;Acc:1307437]                                                         | 5 |
| ENSRNOG000000005971  | 891.13   | 821.65   | 960.61   | 1.17  | 0.23  | 0.027317 | 0.119905014 | Gpr176   | G protein-coupled receptor 176 [Source:RGD Symbol;Acc:621718]                                                          | 2 |
| ENSRNOG000000029245  | 17.75    | 17.57    | 17.92    | 1.02  | 0.03  | 1        | 1           | Gpr179   | G protein-coupled receptor 179 [Source:RGD Symbol;Acc:1560033]                                                         | 5 |
| ENSRNOG000000007126  | 236.46   | 227.27   | 245.65   | 1.08  | 0.11  | 0.490546 | 0.794963446 | Gpr19    | G protein-coupled receptor 19 [Source:RGD Symbol;Acc:71045]                                                            | 2 |
| ENSRNOG000000010880  | 211.63   | 215.64   | 207.63   | 0.96  | -0.05 | 0.718874 | 0.961823854 | Gpr27    | G protein-coupled receptor 27 [Source:RGD Symbol;Acc:71067]                                                            | 5 |
| ENSRNOG000000009540  | 93.23    | 87.53    | 98.94    | 1.13  | 0.18  | 0.407927 | 0.727368026 | Gpr3     | G protein-coupled receptor 3 [Source:RGD Symbol;Acc:628686]                                                            | 1 |
| ENSRNOG000000024030  | 148.54   | 140.03   | 157.05   | 1.12  | 0.17  | 0.378124 | 0.69392565  | Gpr35    | G protein-coupled receptor 35 [Source:RGD Symbol;Acc:1309404]                                                          | 5 |
| ENSRNOG000000017521  | 2.81     | 3.19     | 2.44     | 0.77  | -0.39 | 0.74294  | 0.97729637  | Gpr55    | G protein-coupled receptor 55 [Source:RGD Symbol;Acc:1559828]                                                          | 1 |
| ENSRNOG000000019738  | 271.79   | 265.05   | 278.53   | 1.05  | 0.07  | 0.681852 | 0.938572855 | Gpr61    | G protein-coupled receptor 61 [Source:RGD Symbol;Acc:1310176]                                                          | 2 |
| ENSRNOG000000046309  | 58.32    | 47.05    | 69.59    | 1.48  | 0.56  | 0.021797 | 0.100420241 | Gpr68    | G protein-coupled receptor 68 [Source:RGD Symbol;Acc:1309559]                                                          | 3 |
| ENSRNOG000000008412  | 20.68    | 32.01    | 9.35     | 0.29  | -1.78 | 8.44E-07 | 1.71E-05    | Gprc5a   | G protein-coupled receptor, class C, group 5, member A [Source:RGD Symbol;Acc:1310804]                                 | 3 |
| ENSRNOG000000016360  | 685.69   | 726.23   | 645.14   | 0.89  | -0.17 | 0.124578 | 0.349276018 | Gps2     | G protein pathway suppressor 2 [Source:RGD Symbol;Acc:1562746]                                                         | 2 |
| ENSRNOG000000000441  | 133.27   | 168.46   | 98.08    | 0.58  | -0.78 | 5.44E-05 | 0.000712582 | Gpsm3    | G-protein signaling modulator 3 [Source:RGD Symbol;Acc:1303014]                                                        | 1 |
| ENSRNOG000000048812  | 3716.19  | 4176.24  | 3256.14  | 0.78  | -0.36 | 4.92E-06 | 8.82E-05    | Gpx1     | glutathione peroxidase 1 [Source:RGD Symbol;Acc:2729]                                                                  | 2 |
| ENSRNOG000000013604  | 13354.40 | 13674.11 | 13034.69 | 0.95  | -0.07 | 0.366428 | 0.682567914 | Gpx4     | glutathione peroxidase 4 [Source:RGD Symbol;Acc:69226]                                                                 | 1 |
| ENSRNOG000000016968  | 606.07   | 591.60   | 620.55   | 1.05  | 0.07  | 0.526662 | 0.826662048 | Gramd4   | GRAM domain containing 4 [Source:RGD Symbol;Acc:1309983]                                                               | 2 |
| ENSRNOG000000007346  | 318.01   | 378.42   | 257.60   | 0.68  | -0.55 | 0.00014  | 0.001614608 | Grasp    | GRAP1 (general receptor for phosphoinositides 1)-associated scaffold protein [Source:RGD Symbol;Acc:70554]             | 1 |
| ENSRNOG000000029427  | 404.56   | 375.15   | 433.96   | 1.16  | 0.21  | 0.108739 | 0.321208901 | Grlh3    | brainhead-like 3 (Drosophila) [Source:RGD Symbol;Acc:1308320]                                                          | 5 |
| ENSRNOG000000045816  | 108.07   | 89.22    | 126.91   | 1.42  | 0.51  | 0.01387  | 0.070598527 | Gria1    | glutamate receptor, ionotropic, AMPA 1 [Source:RGD Symbol;Acc:621531]                                                  | 4 |
| ENSRNOG000000028589  | 875.16   | 749.22   | 1001.10  | 1.34  | 0.42  | 4.69E-05 | 0.0006257   | Gria2    | glutamate receptor, ionotropic, AMPA 2 [Source:RGD Symbol;Acc:61862]                                                   | 1 |
| ENSRNOG000000007682  | 567.38   | 550.87   | 583.90   | 1.06  | 0.08  | 0.501823 | 0.805163604 | Gria3    | glutamate receptor, ionotropic, AMPA 3 [Source:RGD Symbol;Acc:70958]                                                   | 1 |
| ENSRNOG000000006957  | 353.22   | 316.42   | 390.02   | 1.23  | 0.30  | 0.026713 | 0.117098552 | Gria4    | glutamate receptor, ionotropic, AMPA 4 [Source:RGD Symbol;Acc:61863]                                                   | 1 |
| ENSRNOG000000001575  | 2186.97  | 2090.58  | 2283.36  | 1.09  | 0.13  | 0.144267 | 0.387675285 | Grik1    | glutamate receptor, ionotropic, kainate 1 [Source:RGD Symbol;Acc:2732]                                                 | 7 |
| ENSRNOG000000030910  | 1151.58  | 1114.34  | 1188.82  | 1.07  | 0.09  | 0.308965 | 0.618460168 | Grik4    | glutamate receptor, ionotropic, kainate 4 [Source:RGD Symbol;Acc:2734]                                                 | 2 |
| ENSRNOG000000011726  | 4289.03  | 4330.02  | 4248.03  | 0.98  | -0.03 | 0.756818 | 0.984702009 | Grin1    | glutamate receptor, ionotropic, N-methyl D-aspartate 1 [Source:RGD Symbol;Acc:2736]                                    | 1 |
| ENSRNOG0000000033942 | 3.08     | 2.95     | 3.21     | 1.09  | 0.12  | 0.982611 | 1           | Grin2a   | glutamate receptor, ionotropic, N-methyl D-aspartate 2A [Source:RGD Symbol;Acc:2737]                                   | 1 |
| ENSRNOG000000008766  | 5.07     | 5.14     | 5.00     | 0.97  | -0.04 | 1        | 1           | Grin2b   | glutamate receptor, ionotropic, N-methyl D-aspartate 2B [Source:RGD Symbol;Acc:2738]                                   | 1 |
| ENSRNOG000000003280  | 74.49    | 43.00    | 105.98   | 2.46  | 1.30  | 1.38E-08 | 3.88E-07    | Grin2c   | glutamate receptor, ionotropic, N-methyl D-aspartate 2C [Source:RGD Symbol;Acc:2739]                                   | 3 |
| ENSRNOG000000021063  | 47.65    | 50.99    | 44.32    | 0.87  | -0.20 | 0.400763 | 0.7201342   | Grin2d   | glutamate receptor, ionotropic, N-methyl D-aspartate 2D [Source:RGD Symbol;Acc:2740]                                   | 1 |
| ENSRNOG000000005723  | 100.28   | 83.58    | 119.94   | 1.40  | 0.49  | 0.017147 | 0.083712816 | Grin3a   | glutamate receptor, ionotropic, N-methyl-D-aspartate 3A [Source:RGD Symbol;Acc:621704]                                 | 1 |
| ENSRNOG000000012562  | 413.30   | 432.18   | 394.42   | 0.91  | -0.13 | 0        |             |          |                                                                                                                        |   |

|                      |          |          |          |      |       |           |             |           |                                                                                                                       |   |
|----------------------|----------|----------|----------|------|-------|-----------|-------------|-----------|-----------------------------------------------------------------------------------------------------------------------|---|
| ENSRNOG00000018237   | 3428.54  | 3694.28  | 3162.81  | 0.86 | -0.22 | 0.003937  | 0.026096995 | Gstp1     | glutathione S-transferase pi 1 [Source:RGD Symbol;Acc:2758]                                                           | 2 |
| ENSRNOG00000004971   | 180.95   | 210.37   | 151.54   | 0.72 | -0.47 | 0.007003  | 0.041468665 | Gstt1     | glutathione S-transferase theta 1 [Source:RGD Symbol;Acc:2765]                                                        | 1 |
| ENSRNOG000000000831  | 664.71   | 691.23   | 638.19   | 0.92 | -0.12 | 0.300139  | 0.607784378 | Gtf2h4    | general transcription factor II H, polypeptide 4 [Source:RGD Symbol;Acc:1303309]                                      | 1 |
| ENSRNOG000000050016  | 585.60   | 612.04   | 559.16   | 0.91 | -0.13 | 0.247855  | 0.543430749 | Gtf3a     | general transcription factor III A [Source:RGD Symbol;Acc:619746]                                                     | 2 |
| ENSRNOG000000019332  | 1978.59  | 2063.49  | 1893.68  | 0.92 | -0.12 | 0.155461  | 0.407826614 | Gtppb2    | GTP binding protein 2 [Source:RGD Symbol;Acc:1306367]                                                                 | 2 |
| ENSRNOG000000048168  | 0.61     | 0.78     | 0.44     | 0.57 | -0.82 | 0.935661  | 1           | Gtppb6    | GTP binding protein 6 (putative) [Source:RGD Symbol;Acc:1305954]                                                      | 2 |
| ENSRNOG000000049952  | 840.82   | 804.19   | 877.45   | 1.09 | 0.13  | 0.218638  | 0.504579606 | Gucd1     | guanylyl cyclase domain containing 1 [Source:RGD Symbol;Acc:15597571]                                                 | 1 |
| ENSRNOG000000012060  | 242.99   | 262.22   | 223.76   | 0.85 | -0.23 | 0.149821  | 0.397802318 | Gucy1b3   | guanylate cyclase 1, soluble, beta 3 [Source:RGD Symbol;Acc:276975]                                                   | 2 |
| ENSRNOG000000010603  | 0.69     | 1.11     | 0.27     | 0.24 | -2.05 | 0.357165  | 0.672307646 | Gzma      | granzyme A [Source:RGD Symbol;Acc:628640]                                                                             | 2 |
| ENSRNOG000000033045  | 0.11     | 0.00     | 0.22     | Inf  | Inf   | 1         | 1           | H2afj     | H2A histone family, member J [Source:RGD Symbol;Acc:1592176]                                                          | 2 |
| ENSRNOG000000011523  | 1866.78  | 1984.30  | 1749.27  | 0.88 | -0.18 | 0.034856  | 0.142196183 | H2afy     | H2A histone family, member Y [Source:RGD Symbol;Acc:621462]                                                           | 5 |
| ENSRNOG000000014743  | 3047.54  | 3080.11  | 3014.97  | 0.98 | -0.03 | 0.679034  | 0.936564353 | Hagh      | hydroxyacyl glutathione hydrolase [Source:RGD Symbol;Acc:27279]                                                       | 2 |
| ENSRNOG000000004502  | 38.08    | 35.35    | 40.82    | 1.15 | 0.21  | 0.485183  | 0.790048456 | Hal       | histidine ammonia lyase [Source:RGD Symbol;Acc:68363]                                                                 | 5 |
| ENSRNOG000000039284  | 609.65   | 623.00   | 596.29   | 0.96 | -0.06 | 0.569611  | 0.853817142 | Haus4     | HAUS augmin-like complex, subunit 4 [Source:RGD Symbol;Acc:1305288]                                                   | 5 |
| ENSRNOG000000047098  | 1112.81  | 1931.13  | 294.49   | 0.15 | -2.71 | 4.85E-149 | 5.66E-146   | Hbb-b1    | hemoglobin, beta adult major chain [Source:RGD Symbol;Acc:1595848]                                                    | 2 |
| ENSRNOG000000011522  | 1205.02  | 991.23   | 1418.80  | 1.43 | 0.52  | 1.87E-08  | 5.14E-07    | Hcn1      | hyperpolarization-activated cyclic nucleotide-gated potassium channel 1 [Source:RGD Symbol;Acc:620688]                | 1 |
| ENSRNOG000000008831  | 4889.26  | 5049.48  | 4729.05  | 0.94 | -0.09 | 0.236617  | 0.530067964 | Hcn2      | hyperpolarization-activated cyclic nucleotide-gated potassium channel 2 [Source:RGD Symbol;Acc:620689]                | 1 |
| ENSRNOG000000020444  | 799.97   | 740.31   | 859.64   | 1.16 | 0.22  | 0.037644  | 0.150789813 | Hcn3      | hyperpolarization-activated cyclic nucleotide-gated potassium channel 3 [Source:RGD Symbol;Acc:620691]                | 5 |
| ENSRNOG000000009450  | 226.29   | 218.39   | 234.18   | 1.07 | 0.10  | 0.482348  | 0.787199188 | Hcn4      | hyperpolarization-activated cyclic nucleotide-gated potassium channel 4 [Source:RGD Symbol;Acc:71065]                 | 6 |
| ENSRNOG000000018892  | 0.24     | 0.00     | 0.47     | Inf  | Inf   | 0.54582   | 0.83315454  | Hcrt      | hypocretin [Source:RGD Symbol;Acc:2786]                                                                               | 1 |
| ENSRNOG000000011251  | 11.27    | 10.23    | 12.31    | 1.20 | 0.27  | 0.611665  | 0.885646155 | Hcrtr2    | hypocretin (orexin) receptor 2 [Source:RGD Symbol;Acc:2788]                                                           | 2 |
| ENSRNOG000000031915  | 922.29   | 987.57   | 857.00   | 0.87 | -0.20 | 0.04276   | 0.165635541 | Hdac10    | histone deacetylase 10 [Source:RGD Symbol;Acc:1305874]                                                                | 2 |
| ENSRNOG000000004158  | 215.57   | 173.58   | 257.56   | 1.48 | 0.57  | 0.000465  | 0.004502911 | Hdac9     | histone deacetylase 9 [Source:RGD Symbol;Acc:1310748]                                                                 | 2 |
| ENSRNOG000000010262  | 34.61    | 43.27    | 25.95    | 0.60 | -0.74 | 0.028336  | 0.122317082 | Hdc       | histidine decarboxylase [Source:RGD Symbol;Acc:2790]                                                                  | 1 |
| ENSRNOG000000000024  | 408.13   | 421.04   | 395.23   | 0.94 | -0.09 | 0.490335  | 0.794743215 | Hebp1     | heme binding protein 1 [Source:RGD Symbol;Acc:1304581]                                                                | 2 |
| ENSRNOG0000000047692 | 1.70     | 1.19     | 2.21     | 1.85 | 0.89  | 0.556187  | 0.84110634  | Hells     | helicase, lymphoid specific [Source:RGD Symbol;Acc:1309820]                                                           | 2 |
| ENSRNOG000000009436  | 63.38    | 124.65   | 2.11     | 0.02 | -5.88 | 7.65E-56  | 1.89E-53    | Hemgn     | hemogen [Source:RGD Symbol;Acc:621569]                                                                                | 2 |
| ENSRNOG000000010893  | 15.65    | 13.83    | 17.47    | 1.26 | 0.34  | 0.384083  | 0.70072092  | Hes3      | hes family bHLH transcription factor 3 [Source:RGD Symbol;Acc:621339]                                                 | 5 |
| ENSRNOG000000020194  | 968.96   | 1027.21  | 910.71   | 0.89 | -0.17 | 0.088566  | 0.279020975 | Hes6      | hes family bHLH transcription factor 6 [Source:RGD Symbol;Acc:1312047]                                                | 2 |
| ENSRNOG000000003203  | 1725.65  | 1806.14  | 1645.15  | 0.91 | -0.13 | 0.107554  | 0.318585547 | Hexim1    | hexamethylene bis-acetamide inducible 1 [Source:RGD Symbol;Acc:1559851]                                               | 1 |
| ENSRNOG000000001863  | 59.57    | 63.27    | 55.87    | 0.88 | -0.18 | 0.479583  | 0.784233045 | Hic2      | hypermethylated in cancer 2 [Source:RGD Symbol;Acc:1305338]                                                           | 2 |
| ENSRNOG000000008292  | 2538.82  | 2322.58  | 2755.07  | 1.19 | 0.25  | 0.003207  | 0.022044307 | Hif1a     | hypoxia-inducible factor 1, alpha subunit (basic helix-loop-helix transcription factor) [Source:RGD Symbol;Acc:61928] | 1 |
| ENSRNOG000000000622  | 874.72   | 874.68   | 874.76   | 1.00 | 0.00  | 0.938856  | 1           | Hint1     | histidine triad nucleotide binding protein 1 [Source:RGD Symbol;Acc:1593411]                                          | 1 |
| ENSRNOG0000000049582 | 6.40     | 4.99     | 7.80     | 1.56 | 0.64  | 0.261889  | 0.562495016 | Hist1h2ai | histone cluster 1, H2ai [Source:RGD Symbol;Acc:2321504]                                                               | 3 |
| ENSRNOG0000000042988 | 1339.40  | 1345.24  | 1333.56  | 0.99 | -0.01 | 0.861777  | 1           | Hist3h2a  | histone cluster 3, H2a [Source:RGD Symbol;Acc:621437]                                                                 | 2 |
| ENSRNOG000000009341  | 324.79   | 265.77   | 383.80   | 1.44 | 0.53  | 0.000176  | 0.001979878 | Hivep3    | human immunodeficiency virus type 1 enhancer binding protein 3 [Source:RGD Symbol;Acc:1311252]                        | 2 |
| ENSRNOG000000010390  | 1302.47  | 1364.02  | 1240.91  | 0.91 | -0.14 | 0.134157  | 0.368583508 | Hmb       | hydroxymethylbilane synthase [Source:RGD Symbol;Acc:2301]                                                             | 2 |
| ENSRNOG000000029813  | 15.07    | 18.68    | 11.47    | 0.61 | -0.70 | 0.07015   | 0.285761    | Hmgb1     | high mobility group box 1 [Source:RGD Symbol;Acc:2802]                                                                | 1 |
| ENSRNOG000000013167  | 18.57    | 25.65    | 11.49    | 0.45 | -1.16 | 0.001372  | 0.010982555 | Hmgb2     | high mobility group box 2 [Source:RGD Symbol;Acc:69291]                                                               | 2 |
| ENSRNOG000000011193  | 423.48   | 375.40   | 471.56   | 1.26 | 0.33  | 0.012931  | 0.066973387 | Hmglc11   | 3-hydroxymethyl-3-methylglutaryl-CoA lyase-like 1 [Source:RGD Symbol;Acc:1565090]                                     | 2 |
| ENSRNOG000000014117  | 508.48   | 540.44   | 476.51   | 0.88 | -0.18 | 0.153324  | 0.404135866 | Hmox1     | heme oxygenase (decycling) 1 [Source:RGD Symbol;Acc:2806]                                                             | 5 |
| ENSRNOG000000003773  | 4213.64  | 4048.34  | 4378.95  | 1.08 | 0.11  | 0.155159  | 0.407132737 | Hmox2     | heme oxygenase (decycling) 2 [Source:RGD Symbol;Acc:67402]                                                            | 1 |
| ENSRNOG000000003661  | 4252.57  | 4323.85  | 4181.30  | 0.97 | -0.05 | 0.514053  | 0.831416574 | Hn1       | hematological and neurological expressed 1 [Source:RGD Symbol;Acc:1359325]                                            | 6 |
| ENSRNOG000000036839  | 606.66   | 606.36   | 606.96   | 1.00 | 0.00  | 0.942847  | 1           | Hnrrpa1   | heterogeneous nuclear ribonucleoprotein A1 [Source:RGD Symbol;Acc:69234]                                              | 2 |
| ENSRNOG000000011621  | 864.92   | 851.76   | 878.08   | 1.03 | 0.04  | 0.719259  | 0.961910531 | Hnrrpc    | heterogeneous nuclear ribonucleoprotein C [Source:RGD Symbol;Acc:1309982]                                             | 1 |
| ENSRNOG000000007921  | 3481.81  | 3689.44  | 3274.17  | 0.89 | -0.17 | 0.027282  | 0.119012917 | Hnrrpm    | heterogeneous nuclear ribonucleoprotein M [Source:RGD Symbol;Acc:620369]                                              | 2 |
| ENSRNOG0000000033790 | 9196.83  | 9259.85  | 9133.81  | 0.99 | -0.02 | 0.751964  | 0.983702988 | Hnrrpu    | heterogeneous nuclear ribonucleoprotein U [Source:RGD Symbol;Acc:620372]                                              | 1 |
| ENSRNOG000000026226  | 233.63   | 202.53   | 264.73   | 1.31 | 0.39  | 0.017574  | 0.085378392 | Hook1     | hook microtubule-tethering protein 1 [Source:RGD Symbol;Acc:1309987]                                                  | 2 |
| ENSRNOG000000003682  | 398.13   | 433.82   | 362.43   | 0.84 | -0.26 | 0.046633  | 0.175663809 | Hook2     | hook microtubule-tethering protein 2 [Source:RGD Symbol;Acc:1310171]                                                  | 2 |
| ENSRNOG000000008191  | 0.48     | 0.48     | 0.49     | 1.03 | 0.04  | 1         | 1           | Hoxb4     | homeo box B4 [Source:RGD Symbol;Acc:1560113]                                                                          | 2 |
| ENSRNOG000000001577  | 21.39    | 16.89    | 25.88    | 1.53 | 0.62  | 0.052872  | 0.193367568 | Hoxd3     | homeo box D3 [Source:RGD Symbol;Acc:1588601]                                                                          | 2 |
| ENSRNOG000000001578  | 34.99    | 41.12    | 28.87    | 0.70 | -0.51 | 0.077467  | 0.253307087 | Hoxd4     | homeo box D4 [Source:RGD Symbol;Acc:1309690]                                                                          | 2 |
| ENSRNOG000000006979  | 1216.86  | 1170.78  | 1262.94  | 1.08 | 0.11  | 0.225672  | 0.515381067 | Hpca      | hippocalcin [Source:RGD Symbol;Acc:620060]                                                                            | 5 |
| ENSRNOG000000005492  | 5079.98  | 4812.36  | 5347.61  | 1.11 | 0.15  | 0.045079  | 0.171519816 | Hpcal1    | hippocalcin-like 1 [Source:RGD Symbol;Acc:708375]                                                                     | 5 |
| ENSRNOG000000050983  | 32.97    | 33.42    | 32.52    | 0.97 | -0.04 | 0.861428  | 1           | Hpcal4    | hippocalcin-like 4 [Source:RGD Symbol;Acc:708491]                                                                     | 3 |
| ENSRNOG000000016611  | 1574.26  | 1657.71  | 1490.80  | 0.91 | -0.15 | 0.082051  | 0.263406855 | Hras      | Harvey rat sarcoma virus oncogene [Source:RGD Symbol;Acc:2827]                                                        | 2 |
| ENSRNOG000000007420  | 60.48    | 63.48    | 57.48    | 0.91 | -0.14 | 0.543371  | 0.83315454  | Hrh1      | histamine receptor H 1 [Source:RGD Symbol;Acc:2830]                                                                   | 2 |
| ENSRNOG000000007420  | 60.48    | 63.48    | 57.48    | 0.91 | -0.14 | 0.543371  | 0.83315454  | Hrh1      | histamine receptor H 1 [Source:RGD Symbol;Acc:2830]                                                                   | 4 |
| ENSRNOG000000018260  | 8.86     | 6.51     | 11.22    | 1.72 | 0.79  | 0.116235  | 0.335461184 | Hrh2      | histamine receptor H 2 [Source:RGD Symbol;Acc:2831]                                                                   | 2 |
| ENSRNOG000000018260  | 8.86     | 6.51     | 11.22    | 1.72 | 0.79  | 0.116235  | 0.335461184 | Hrh2      | histamine receptor H 2 [Source:RGD Symbol;Acc:2831]                                                                   | 4 |
| ENSRNOG000000008080  | 355.02   | 377.28   | 332.76   | 0.88 | -0.18 | 0.206625  | 0.487429749 | Hrh3      | histamine receptor H3 [Source:RGD Symbol;Acc:620630]                                                                  | 7 |
| ENSRNOG000000030880  | 384.54   | 343.19   | 425.88   | 1.24 | 0.31  | 0.022939  | 0.10440479  | Hs6t2     | heparan sulfate 6-O-sulfotransferase 2 [Source:RGD Symbol;Acc:1564397]                                                | 5 |
| ENSRNOG000000042693  | 80.58    | 78.80    | 82.36    | 1.05 | 0.06  | 0.788159  | 1           | Hsbp11    | heat shock factor binding protein 1-like 1 [Source:RGD Symbol;Acc:2301798]                                            | 2 |
| ENSRNOG000000019830  | 48.15    | 49.06    | 47.23    | 0.96 | -0.05 | 0.7928    | 1           | Hsd17b1   | hydroxysteroid (17-beta) dehydrogenase 1 [Source:RGD Symbol;Acc:2836]                                                 | 3 |
| ENSRNOG000000004666  | 703.23   | 756.05   | 650.41   | 0.86 | -0.22 | 0.047881  | 0.179262464 | Hsd17b8   | hydroxysteroid (17-beta) dehydrogenase 8 [Source:RGD Symbol;Acc:1303158]                                              | 1 |
| ENSRNOG000000019834  | 55996.08 | 56480.74 | 55511.43 | 0.98 | -0.02 | 0.760593  | 0.987230111 | Hsp90ab1  | heat shock protein 90 alpha (cytosolic), class B member 1 [Source:RGD Symbol;Acc:1303075]                             | 1 |
| ENSRNOG000000050647  | 60.95    | 52.80    | 69.11    | 1.31 | 0.39  | 0.122593  | 0.345987555 | Hspa1a    | heat shock protein 1A [Source:RGD Symbol;Acc:1593284]                                                                 | 3 |
| ENSRNOG000000032585  | 133.89   | 123.90   | 143.89   | 1.16 | 0.22  | 0.298327  | 0.605800826 | Hspa8     | heat shock 70kDa protein 8 [Source:RGD Symbol;Acc:621725]                                                             | 1 |
| ENSRNOG000000019525  | 5358.97  | 5335.11  | 5382.84  | 1.01 | 0.01  | 0.888811  | 1           | Hspa9     | heat shock protein 9 [Source:RGD Symbol;Acc:1311806]                                                                  | 1 |
| ENSRNOG000000022392  | 10638.77 | 10455.37 | 10822.17 | 1.04 | 0.05  | 0.546874  | 0.833857067 | Hspb8     | heat shock protein B8 [Source:RGD Symbol;Acc:71003]                                                                   | 2 |
| ENSRNOG000000010254  | 49.69    | 41.06    | 58.31    | 1.42 | 0.51  | 0.044648  | 0.170560737 | Htr1a     | 5-hydroxytryptamine (serotonin) receptor 1A, G protein-coupled [Source:RGD Symbol;Acc:2845]                           | 7 |
| ENSRNOG000000013042  | 201.14   | 170.43   | 231.86   | 1.36 | 0.44  | 0.005136  | 0.03233809  | Htr1b     | 5-hydroxytryptamine (serotonin) receptor 1B, G protein-coupled [Source:RGD Symbol;Acc:2846]                           | 1 |
| ENSRNOG000000000716  | 5.63     | 5.37     | 5.89     | 1.10 | 0.14  | 0.878487  | 1           | Htr1f     | 5-hydroxytryptamine (serotonin) receptor 1F, G protein-coupled [Source:RGD Symbol;Acc:71083]                          | 2 |
| ENSRNOG000000010063  | 98.49    | 80.21    | 116.77   | 1.46 | 0.54  | 0.01049   | 0.057068132 | Htr2a     | 5-hydroxytryptamine (serotonin) receptor 2A, G protein-coupled [Source:RGD Symbol;Acc:61800]                          | 1 |
| ENSRNOG000000017625  | 15.93    | 19.03    | 12.83    | 0.67 | -0.57 | 0.147532  | 0.393530854 | Htr2b     | 5-hydroxytryptamine (serotonin) receptor 2B, G protein-coupled [Source:RGD Symbol;Acc:61801]                          | 1 |
| ENSRNOG000000030877  | 9.03     | 8.76     | 9.29     | 1.06 | 0.08  | 0.843498  | 1           | Htr2c     | 5-hydroxytryptamine (serotonin) receptor 2C, G protein-coupled [Source:RGD Symbol;Acc:2848]                           | 1 |
| ENSRNOG000000006595  | 5280.58  | 5088.10  | 5473.06  | 1.08 | 0.11  | 0.166353  | 0.424813758 | Htr3a     | 5-hydroxytryptamine (serotonin) receptor 3A, ionotropic [Source:RGD Symbol;Acc:61818]                                 | 1 |
| ENSRNOG000000006920  | 2815     |          |          |      |       |           |             |           |                                                                                                                       |   |

|                      |         |         |         |      |        |          |             |           |                                                                                                                                 |   |
|----------------------|---------|---------|---------|------|--------|----------|-------------|-----------|---------------------------------------------------------------------------------------------------------------------------------|---|
| ENSRNOG00000024204   | 0.25    | 0.29    | 0.22    | 0.75 | -0.42  | 1        | 1           | lfne      | interferon, epsilon [Source:RGD Symbol;Acc:1565065]                                                                             | 1 |
| ENSRNOG00000012074   | 2254.03 | 2434.43 | 2073.63 | 0.85 | -0.23  | 0.004468 | 0.028879836 | lfng1r    | interferon gamma receptor 1 [Source:RGD Symbol;Acc:620570]                                                                      | 1 |
| ENSRNOG000000050997  | 811.92  | 801.32  | 822.51  | 1.03 | 0.04   | 0.745123 | 0.978834273 | lfrrd1    | interferon-related developmental regulator 1 [Source:RGD Symbol;Acc:2867]                                                       | 1 |
| ENSRNOG000000016150  | 308.63  | 357.39  | 259.86  | 0.73 | -0.46  | 0.001565 | 0.012278174 | lfrrd2    | interferon-related developmental regulator 2 [Source:RGD Symbol;Acc:1310222]                                                    | 2 |
| ENSRNOG000000016545  | 1127.70 | 1084.86 | 1170.55 | 1.08 | 0.11   | 0.249065 | 0.545230922 | lft140    | intraflagellar transport 140 [Source:RGD Symbol;Acc:2318759]                                                                    | 2 |
| ENSRNOG000000004517  | 299.78  | 354.97  | 244.59  | 0.69 | -0.54  | 0.000276 | 0.002916871 | lfg1      | insulin-like growth factor 1 [Source:RGD Symbol;Acc:2868]                                                                       | 1 |
| ENSRNOG000000016957  | 1896.82 | 1933.79 | 1859.86 | 0.96 | -0.06  | 0.519078 | 0.819425187 | lfgfbp2   | insulin-like growth factor binding protein 2 [Source:RGD Symbol;Acc:2873]                                                       | 3 |
| ENSRNOG000000011320  | 113.68  | 96.29   | 131.07  | 1.36 | 0.44   | 0.032642 | 0.135649954 | lfgfbp1   | insulin-like growth factor binding protein-like 1 [Source:RGD Symbol;Acc:1305656]                                               | 3 |
| ENSRNOG000000016725  | 1721.85 | 1677.52 | 1766.18 | 1.05 | 0.07   | 0.388202 | 0.705473334 | lkbkap    | inhibitor of kappa light polypeptide gene enhancer in B-cells, kinase complex-associated protein [Source:RGD Symbol;Acc:620072] | 1 |
| ENSRNOG000000019073  | 931.86  | 1016.63 | 847.09  | 0.83 | -0.26  | 0.008476 | 0.048342596 | lkbkb     | inhibitor of kappa light polypeptide gene enhancer in B-cells, kinase beta [Source:RGD Symbol;Acc:621375]                       | 1 |
| ENSRNOG000000025100  | 282.49  | 313.39  | 251.59  | 0.80 | -0.32  | 0.04046  | 0.158653779 | lkbke     | inhibitor of kappa light polypeptide gene enhancer in B-cells, kinase epsilon [Source:RGD Symbol;Acc:1308352]                   | 1 |
| ENSRNOG000000004647  | 0.23    | 0.24    | 0.22    | 0.90 | -0.14  | 1        | 1           | ll10      | interleukin 10 [Source:RGD Symbol;Acc:2886]                                                                                     | 1 |
| ENSRNOG000000007652  | 0.11    | 0.00    | 0.22    | Inf  | Inf    | 1        | 1           | ll13      | interleukin 13 [Source:RGD Symbol;Acc:68949]                                                                                    | 1 |
| ENSRNOG000000011680  | 2459.58 | 2858.33 | 2060.83 | 0.72 | -0.47  | 1.42E-08 | 3.99E-07    | ll16      | interleukin 16 [Source:RGD Symbol;Acc:1583872]                                                                                  | 1 |
| ENSRNOG000000009848  | 43.28   | 50.74   | 35.82   | 0.71 | -0.50  | 0.06301  | 0.219159789 | ll18      | interleukin 18 [Source:RGD Symbol;Acc:2889]                                                                                     | 1 |
| ENSRNOG000000004575  | 0.99    | 0.00    | 1.97    | Inf  | Inf    | 0.016394 | 0.080692372 | ll1a      | interleukin 1 alpha [Source:RGD Symbol;Acc:2890]                                                                                | 1 |
| ENSRNOG000000004649  | 31.00   | 39.51   | 22.50   | 0.57 | -0.81  | 0.005651 | 0.034858806 | ll1b      | interleukin 1 beta [Source:RGD Symbol;Acc:2891]                                                                                 | 4 |
| ENSRNOG000000014504  | 133.43  | 122.67  | 144.19  | 1.18 | 0.23   | 0.191713 | 0.465432886 | ll1r1     | interleukin 1 receptor, type 1 [Source:RGD Symbol;Acc:2892]                                                                     | 1 |
| ENSRNOG000000001928  | 185.92  | 163.74  | 208.11  | 1.27 | 0.35   | 0.046532 | 0.17539782  | ll1rap    | interleukin 1 receptor accessory protein [Source:RGD Symbol;Acc:2893]                                                           | 1 |
| ENSRNOG000000005871  | 28.05   | 44.37   | 11.74   | 0.26 | -1.92  | 4.79E-09 | 1.47E-07    | ll1rn     | interleukin 1 receptor antagonist [Source:RGD Symbol;Acc:621159]                                                                | 1 |
| ENSRNOG000000017348  | 0.12    | 0.24    | 0.00    | 0.00 | #NAME? | 0.964516 | 1           | ll2       | interleukin 2 [Source:RGD Symbol;Acc:620047]                                                                                    | 1 |
| ENSRNOG000000015773  | 46.39   | 69.20   | 23.59   | 0.34 | -1.55  | 6.63E-09 | 1.98E-07    | ll21r     | interleukin 21 receptor [Source:RGD Symbol;Acc:1304950]                                                                         | 1 |
| ENSRNOG000000027976  | 5.39    | 5.83    | 4.94    | 0.85 | -0.24  | 0.948959 | 1           | ll22ra1   | interleukin 22 receptor, alpha 1 [Source:RGD Symbol;Acc:1559655]                                                                | 1 |
| ENSRNOG000000012259  | 12.51   | 8.35    | 16.67   | 2.00 | 1.00   | 0.024728 | 0.110720404 | ll22ra2   | interleukin 22 receptor, alpha 2 [Source:RGD Symbol;Acc:1303169]                                                                | 1 |
| ENSRNOG000000047647  | 5.15    | 6.56    | 3.74    | 0.57 | -0.81  | 0.181489 | 0.44906262  | ll2ra     | interleukin 2 receptor, alpha [Source:RGD Symbol;Acc:2895]                                                                      | 1 |
| ENSRNOG0000000048636 | 15.52   | 18.76   | 12.29   | 0.66 | -0.61  | 0.129538 | 0.358733761 | ll2rb     | interleukin 2 receptor, beta [Source:RGD Symbol;Acc:2896]                                                                       | 6 |
| ENSRNOG000000042080  | 213.92  | 175.78  | 252.07  | 1.43 | 0.52   | 0.001285 | 0.01040344  | ll31ra    | interleukin 31 receptor A [Source:RGD Symbol;Acc:1586476]                                                                       | 5 |
| ENSRNOG0000000016456 | 2981.10 | 2807.39 | 3154.81 | 1.12 | 0.17   | 0.068077 | 0.230601947 | ll33      | interleukin 33 [Source:RGD Symbol;Acc:1311155]                                                                                  | 1 |
| ENSRNOG000000007624  | 0.75    | 1.28    | 0.22    | 0.18 | -2.51  | 0.213858 | 0.497840296 | ll4       | interleukin 4 [Source:RGD Symbol;Acc:2898]                                                                                      | 1 |
| ENSRNOG000000008111  | 0.37    | 0.00    | 0.74    | Inf  | Inf    | 0.293035 | 0.598657499 | ll5       | interleukin 5 [Source:RGD Symbol;Acc:2900]                                                                                      | 1 |
| ENSRNOG000000010278  | 1.60    | 1.75    | 1.46    | 0.83 | -0.27  | 0.905214 | 1           | ll6       | interleukin 6 [Source:RGD Symbol;Acc:2901]                                                                                      | 1 |
| ENSRNOG000000013963  | 8121.09 | 7960.09 | 8282.10 | 1.04 | 0.06   | 0.459247 | 0.77531279  | ll6st     | interleukin 6 signal transducer [Source:RGD Symbol;Acc:2903]                                                                    | 1 |
| ENSRNOG0000000045844 | 2869.47 | 2567.64 | 3171.30 | 1.24 | 0.30   | 0.000241 | 0.002606604 | ll6st2    | imprinted and ancient [Source:RGD Symbol;Acc:1591977]                                                                           | 2 |
| ENSRNOG000000020248  | 1796.38 | 1656.79 | 1935.97 | 1.17 | 0.22   | 0.010444 | 0.056881499 | llna      | internexin neuronal intermediate filament protein, alpha [Source:RGD Symbol;Acc:2911]                                           | 5 |
| ENSRNOG000000007551  | 3057.15 | 2912.24 | 3202.06 | 1.10 | 0.14   | 0.077002 | 0.25207227  | llnad     | InaD-like [Drosophila] [Source:RGD Symbol;Acc:1565362]                                                                          | 1 |
| ENSRNOG0000000032929 | 1697.88 | 1668.23 | 1727.52 | 1.04 | 0.05   | 0.575916 | 0.858950734 | llncnp    | inner centromere protein [Source:RGD Symbol;Acc:1305292]                                                                        | 2 |
| ENSRNOG000000020097  | 368.13  | 396.73  | 339.53  | 0.86 | -0.22  | 0.112175 | 0.327929842 | llnha     | inhibin alpha [Source:RGD Symbol;Acc:2912]                                                                                      | 2 |
| ENSRNOG000000008873  | 738.88  | 775.96  | 701.80  | 0.90 | -0.14  | 0.181366 | 0.44909509  | llno8ob   | INO80 complex subunit B [Source:RGD Symbol;Acc:1562258]                                                                         | 2 |
| ENSRNOG000000024272  | 34.40   | 27.88   | 40.92   | 1.47 | 0.55   | 0.040191 | 0.157893106 | llno8od   | INO80 complex subunit D [Source:RGD Symbol;Acc:1304808]                                                                         | 2 |
| ENSRNOG000000015868  | 2.89    | 3.21    | 2.57    | 0.80 | -0.32  | 0.881334 | 1           | llnsl6    | insulin-like 6 [Source:RGD Symbol;Acc:62061]                                                                                    | 2 |
| ENSRNOG000000007754  | 268.16  | 245.31  | 291.02  | 1.19 | 0.25   | 0.087387 | 0.275759313 | llnsm2    | insulinoma-associated 2 [Source:RGD Symbol;Acc:1306949]                                                                         | 5 |
| ENSRNOG000000026420  | 37.17   | 39.81   | 34.53   | 0.87 | -0.21  | 0.494184 | 0.798765401 | llqcg     | IQ motif containing G [Source:RGD Symbol;Acc:1311606]                                                                           | 2 |
| ENSRNOG000000027894  | 141.21  | 150.95  | 131.48  | 0.87 | -0.20  | 0.311319 | 0.621396452 | llqgap3   | IQ motif containing GTPase activating protein 3 [Source:RGD Symbol;Acc:1305951]                                                 | 2 |
| ENSRNOG000000027894  | 141.21  | 150.95  | 131.48  | 0.87 | -0.20  | 0.311319 | 0.621396452 | llqgap3   | IQ motif containing GTPase activating protein 3 [Source:RGD Symbol;Acc:1305951]                                                 | 3 |
| ENSRNOG000000004226  | 347.62  | 377.40  | 317.85  | 0.84 | -0.25  | 0.065259 | 0.223978737 | llrak3    | interleukin-1 receptor-associated kinase 3 [Source:RGD Symbol;Acc:1308846]                                                      | 2 |
| ENSRNOG000000009824  | 439.10  | 431.49  | 446.71  | 1.04 | 0.05   | 0.691266 | 0.943449877 | llrf2     | interferon regulatory factor 2 [Source:RGD Symbol;Acc:1304922]                                                                  | 5 |
| ENSRNOG000000005082  | 1378.24 | 1280.55 | 1475.92 | 1.15 | 0.20   | 0.024574 | 0.110170023 | llrf6     | interferon regulatory factor 6 [Source:RGD Symbol;Acc:1309645]                                                                  | 5 |
| ENSRNOG000000017414  | 421.48  | 427.96  | 415.00  | 0.97 | -0.04  | 0.772321 | 0.993496872 | llrf7     | interferon regulatory factor 7 [Source:RGD Symbol;Acc:1307828]                                                                  | 2 |
| ENSRNOG000000019478  | 1014.10 | 987.05  | 1041.15 | 1.05 | 0.08   | 0.439918 | 0.759021555 | llrf9     | interferon regulatory factor 9 [Source:RGD Symbol;Acc:1308766]                                                                  | 2 |
| ENSRNOG00000001389   | 129.25  | 153.59  | 104.91  | 0.68 | -0.55  | 0.000204 | 0.027487548 | llrs3     | insulin receptor substrate 3 [Source:RGD Symbol;Acc:69317]                                                                      | 3 |
| ENSRNOG000000011037  | 2.82    | 5.16    | 0.48    | 0.09 | -3.42  | 0.000745 | 0.00688862  | llrx6     | iroquois homeobox 6 [Source:RGD Symbol;Acc:1564830]                                                                             | 2 |
| ENSRNOG000000021802  | 255.89  | 220.50  | 291.29  | 1.32 | 0.40   | 0.008503 | 0.04685343  | llsg15    | ISG15 ubiquitin-like modifier [Source:RGD Symbol;Acc:1310312]                                                                   | 2 |
| ENSRNOG000000018151  | 61.70   | 62.45   | 60.95   | 0.98 | -0.04  | 0.89876  | 1           | llsg20    | interferon stimulated exonuclease gene 20 [Source:RGD Symbol;Acc:1306407]                                                       | 2 |
| ENSRNOG000000015336  | 2775.35 | 2776.24 | 2774.45 | 1.00 | 0.00   | 0.981327 | 1           | llsl2     | ISL LIM homeobox 2 [Source:RGD Symbol;Acc:621849]                                                                               | 5 |
| ENSRNOG000000019728  | 105.78  | 120.10  | 91.47   | 0.76 | -0.39  | 0.035297 | 0.14352251  | lltgam    | integrin, alpha M [Source:RGD Symbol;Acc:2926]                                                                                  | 1 |
| ENSRNOG000000006860  | 22.03   | 21.44   | 22.61   | 1.05 | 0.08   | 0.861301 | 1           | lltk      | IL2-inducible T-cell kinase [Source:RGD Symbol;Acc:1311618]                                                                     | 3 |
| ENSRNOG000000002969  | 1225.99 | 1255.70 | 1196.27 | 0.95 | -0.07  | 0.500722 | 0.804201045 | lltpkb    | inositol-trisphosphate 3-kinase B [Source:RGD Symbol;Acc:2932]                                                                  | 2 |
| ENSRNOG000000007104  | 377.69  | 378.56  | 376.82  | 1.00 | -0.01  | 0.973806 | 1           | lltpr1    | inositol 1,4,5-trisphosphate receptor, type 1 [Source:RGD Symbol;Acc:2933]                                                      | 1 |
| ENSRNOG000000048902  | 889.43  | 888.15  | 890.71  | 1.00 | 0.00   | 0.995051 | 1           | llvns1abp | influenza virus NS1A binding protein [Source:RGD Symbol;Acc:1306290]                                                            | 1 |
| ENSRNOG000000031950  | 244.88  | 267.82  | 221.93  | 0.83 | -0.27  | 0.092704 | 0.287734505 | llzumo4   | IZUMO family member 4 [Source:RGD Symbol;Acc:1564722]                                                                           | 2 |
| ENSRNOG000000039837  | 42.61   | 40.75   | 44.47   | 1.09 | 0.13   | 0.646045 | 0.912466559 | lljade3   | jade family PHD finger 3 [Source:RGD Symbol;Acc:1563945]                                                                        | 2 |
| ENSRNOG000000018669  | 355.21  | 380.95  | 329.47  | 0.86 | -0.21  | 0.136451 | 0.372675216 | lljak3    | Janus kinase 3 [Source:RGD Symbol;Acc:2940]                                                                                     | 2 |
| ENSRNOG000000006110  | 9.03    | 10.43   | 7.62    | 0.73 | -0.45  | 0.351374 | 0.668347813 | lljph1    | junctophilin 1 [Source:RGD Symbol;Acc:1308789]                                                                                  | 2 |
| ENSRNOG000000008170  | 60.12   | 97.97   | 22.27   | 0.23 | -2.14  | 4.43E-16 | 2.77E-14    | lljph2    | junctophilin 2 [Source:RGD Symbol;Acc:1305196]                                                                                  | 2 |
| ENSRNOG000000025589  | 2121.41 | 1983.27 | 2259.55 | 1.14 | 0.19   | 0.020401 | 0.095517272 | lljph4    | junctophilin 4 [Source:RGD Symbol;Acc:1303170]                                                                                  | 2 |
| ENSRNOG000000026293  | 2143.78 | 2201.86 | 2085.70 | 0.95 | -0.08  | 0.385997 | 0.702668725 | lljun     | jun proto-oncogene [Source:RGD Symbol;Acc:2943]                                                                                 | 1 |
| ENSRNOG000000042838  | 544.59  | 608.43  | 480.74  | 0.79 | -0.34  | 0.004018 | 0.02650382  | lljunb    | jun B proto-oncogene [Source:RGD Symbol;Acc:2944]                                                                               | 3 |
| ENSRNOG000000013390  | 135.37  | 117.92  | 152.81  | 1.30 | 0.37   | 0.057681 | 0.205699212 | llkbtb8   | kelch repeat and BTB (POZ) domain containing 8 [Source:RGD Symbol;Acc:1563166]                                                  | 2 |
| ENSRNOG000000019750  | 1484.70 | 1202.54 | 1766.86 | 1.47 | 0.56   | 9.12E-11 | 3.56E-09    | llkcna1   | potassium voltage-gated channel, shaker-related subfamily, member 1 [Source:RGD Symbol;Acc:2949]                                | 1 |
| ENSRNOG000000018285  | 690.40  | 447.49  | 933.30  | 2.09 | 1.06   | 1.13E-22 | 1.03E-20    | llkcna2   | potassium voltage-gated channel, shaker-related subfamily, member 2 [Source:RGD Symbol;Acc:2950]                                | 1 |
| ENSRNOG000000018116  | 8.94    | 7.96    | 9.91    | 1.24 | 0.32   | 0.521313 | 0.821640745 | llkcna3   | potassium voltage-gated channel, shaker-related subfamily, member 3 [Source:RGD Symbol;Acc:2951]                                | 5 |
| ENSRNOG000000004918  | 778.06  | 638.82  | 917.30  | 1.44 | 0.52   | 1.02E-06 | 2.02E-05    | llkcna4   | potassium voltage-gated channel, shaker-related subfamily, member 4 [Source:RGD Symbol;Acc:2952]                                | 5 |
| ENSRNOG000000020779  | 13.22   | 14.26   | 12.18   | 0.85 | -0.23  | 0.637306 | 0.906180933 | llkcna7   | potassium voltage-gated channel, shaker-related subfamily, member 7 [Source:RGD Symbol;Acc:1309632]                             | 3 |
| ENSRNOG000000010422  | 3950.99 | 3381.08 | 4520.89 | 1.34 | 0.42   | 9.40E-08 | 2.26E-06    | llkcna1b  | potassium voltage-gated channel, shaker-related subfamily, beta member 1 [Source:RGD Symbol;Acc:6128829]                        | 2 |
| ENSRNOG000000004077  | 704.40  | 622.85  | 785.94  | 1.26 | 0.34   | 0.00254  | 0.018345612 | llkcnc2   | potassium voltage-gated channel, Shaw-related subfamily, member 2 [Source:RGD Symbol;Acc:628829]                                | 5 |
| ENSRNOG000000014686  | 423.63  | 338.26  | 509.00  | 1.50 | 0.59   | 3.80E-06 | 6.62E-05    | llkcnd3   | potassium voltage-gated channel, Shal-related subfamily, member 3 [Source:RGD Symbol;Acc:68394]                                 | 5 |
| ENSRNOG000000017054  | 68.52   | 67.38   | 69.65   | 1.03 | 0.05   | 0.864695 | 1           | llkcne3   | potassium voltage-gated channel, Isk-related family, member 3 [Source:RGD Symbol;Acc:621384]                                    | 2 |
| ENSRNOG000000024310  | 344.83  | 345.94  | 343.72  | 0.99 | -0.01  | 0.943477 | 1           | llkcnf1   | potassium voltage-gated channel, subfamily F, member 1 [Source:RG                                                               |   |

|                       |          |          |          |      |       |          |              |         |                                                                                                                        |   |
|-----------------------|----------|----------|----------|------|-------|----------|--------------|---------|------------------------------------------------------------------------------------------------------------------------|---|
| ENSRNOG000000005369   | 774.38   | 581.45   | 967.30   | 1.66 | 0.73  | 1.99E-12 | 9.02E-11     | Kcnj3   | potassium inwardly-rectifying channel, subfamily J, member 3 [Source:RGD Symbol;Acc:2958]                              | 1 |
| ENSRNOG000000003796   | 41.03    | 43.35    | 38.71    | 0.89 | -0.16 | 0.563643 | 0.847855006  | Kcnj5   | potassium inwardly-rectifying channel, subfamily J, member 5 [Source:RGD Symbol;Acc:61971]                             | 1 |
| ENSRNOG000000001658   | 35.44    | 24.68    | 46.20    | 1.87 | 0.90  | 0.001489 | 0.011735981  | Kcnj6   | potassium inwardly-rectifying channel, subfamily J, member 6 [Source:RGD Symbol;Acc:2959]                              | 7 |
| ENSRNOG0000000013463  | 158.57   | 211.36   | 105.78   | 0.50 | -1.00 | 3.38E-08 | 8.74E-07     | Kcnj8   | potassium inwardly-rectifying channel, subfamily J, member 8 [Source:RGD Symbol;Acc:2960]                              | 1 |
| ENSRNOG000000007645   | 362.68   | 404.28   | 321.08   | 0.79 | -0.33 | 0.016627 | 0.081629698  | Kcnj9   | potassium inwardly-rectifying channel, subfamily J, member 9 [Source:RGD Symbol;Acc:621440]                            | 1 |
| ENSRNOG0000000016110  | 194.27   | 166.12   | 222.43   | 1.34 | 0.42  | 0.01018  | 0.055790165  | Kcnk12  | potassium channel, subfamily K, member 12 [Source:RGD Symbol;Acc:68940]                                                | 5 |
| ENSRNOG0000000047363  | 17.71    | 18.66    | 16.76    | 0.90 | -0.16 | 0.68434  | 0.940264906  | Kcnk13  | potassium channel, subfamily K, member 13 [Source:RGD Symbol;Acc:68941]                                                | 3 |
| ENSRNOG000000006422   | 7.12     | 9.17     | 5.07     | 0.55 | -0.86 | 0.098526 | 0.299611583  | Kcnk16  | potassium channel, subfamily K, member 16 [Source:RGD Symbol;Acc:1582911]                                              | 5 |
| ENSRNOG0000000032706  | 351.79   | 287.72   | 415.86   | 1.45 | 0.53  | 0.000107 | 0.001271633  | Kcnk18  | potassium channel, subfamily K, member 18 [Source:RGD Symbol;Acc:1303091]                                              | 1 |
| ENSRNOG000000002653   | 761.57   | 744.76   | 778.38   | 1.05 | 0.06  | 0.668977 | 0.929432154  | Kcnk2   | potassium channel, subfamily K, member 2 [Source:RGD Symbol;Acc:621448]                                                | 6 |
| ENSRNOG000000009790   | 234.87   | 224.28   | 245.46   | 1.09 | 0.13  | 0.385287 | 0.702106739  | Kcnk3   | potassium channel, subfamily K, member 3 [Source:RGD Symbol;Acc:61997]                                                 | 1 |
| ENSRNOG000000009265   | 30.07    | 28.68    | 31.47    | 1.10 | 0.13  | 0.653294 | 0.917585168  | Kcnk9   | potassium channel, subfamily K, member 9 [Source:RGD Symbol;Acc:621451]                                                | 4 |
| ENSRNOG000000005465   | 10.41    | 17.95    | 2.87     | 0.16 | -2.65 | 1.66E-07 | 3.87E-06     | Kcnmb1  | potassium large conductance calcium-activated channel, subfamily M, beta member 1 [Source:RGD Symbol;Acc:2961]         | 5 |
| ENSRNOG000000010094   | 72.66    | 58.23    | 87.09    | 1.50 | 0.58  | 0.01096  | 0.058803637  | Kcnmb2  | potassium large conductance calcium-activated channel, subfamily M, beta member 2 [Source:RGD Symbol;Acc:631398]       | 3 |
| ENSRNOG0000000029264  | 553.95   | 557.56   | 550.35   | 0.99 | -0.02 | 0.944773 |              | 1 Kcnn1 | potassium intermediate/small conductance calcium-activated channel, subfamily N, member 1 [Source:RGD Symbol;Acc:2962] | 5 |
| ENSRNOG0000000020706  | 158.67   | 132.66   | 184.68   | 1.39 | 0.48  | 0.004717 | 0.030149911  | Kcnn3   | potassium intermediate/small conductance calcium-activated channel, subfamily N, member 3 [Source:RGD Symbol;Acc:2964] | 5 |
| ENSRNOG0000000013681  | 2631.79  | 2481.44  | 2782.14  | 1.12 | 0.17  | 0.03484  | 0.142161501  | Kcns1   | potassium voltage-gated channel, delayed-rectifier, subfamily S, member 1 [Source:RGD Symbol;Acc:621524]               | 1 |
| ENSRNOG0000000011369  | 13.28    | 12.65    | 13.90    | 1.10 | 0.14  | 0.885904 |              | 1 Kcns2 | potassium voltage-gated channel, delayed-rectifier, subfamily S, member 2 [Source:RGD Symbol;Acc:621525]               | 3 |
| ENSRNOG0000000017283  | 2178.34  | 1966.17  | 2390.51  | 1.22 | 0.28  | 0.000617 | 0.00570422   | Kcnt1   | potassium channel, subfamily T, member 1 [Source:RGD Symbol;Acc:621106]                                                | 5 |
| ENSRNOG0000000021008  | 151.22   | 119.80   | 182.64   | 1.52 | 0.61  | 0.000808 | 0.007160085  | Kctd16  | potassium channel tetramerization domain containing 16 [Source:RGD Symbol;Acc:1559856]                                 | 2 |
| ENSRNOG0000000000231  | 3579.01  | 3802.90  | 3355.11  | 0.88 | -0.18 | 0.021325 | 0.098700726  | Kctd17  | potassium channel tetramerization domain containing 17 [Source:RGD Symbol;Acc:1311154]                                 | 1 |
| ENSRNOG0000000026472  | 932.31   | 868.77   | 995.84   | 1.15 | 0.20  | 0.047572 | 0.178359375  | Kctd8   | potassium channel tetramerization domain containing 8 [Source:RGD Symbol;Acc:1312020]                                  | 2 |
| ENSRNOG0000000007177  | 1217.10  | 1263.88  | 1170.31  | 0.93 | -0.11 | 0.221508 | 0.509133211  | Kdelc2  | KDEL (Lys-Asp-Glu-Leu) containing 2 [Source:RGD Symbol;Acc:1562027]                                                    | 2 |
| ENSRNOG0000000025702  | 423.87   | 436.75   | 410.99   | 0.94 | -0.09 | 0.54944  | 0.835985071  | Kdm2b   | lysine (K)-specific demethylase 2B [Source:RGD Symbol;Acc:1310217]                                                     | 2 |
| ENSRNOG0000000002781  | 837.42   | 830.11   | 844.72   | 1.02 | 0.03  | 0.824821 |              | 1 Kdsr  | 3-ketodihydroshpingosine reductase [Source:RGD Symbol;Acc:1307775]                                                     | 2 |
| ENSRNOG0000000016715  | 103.88   | 121.23   | 86.52    | 0.71 | -0.49 | 0.017879 | 0.086424525  | Kif11   | kinesin family member 11 [Source:RGD Symbol;Acc:621258]                                                                | 2 |
| ENSRNOG0000000005037  | 25.89    | 26.98    | 24.80    | 0.92 | -0.12 | 0.705294 | 0.952994602  | Kif18a  | kinesin family member 18A [Source:RGD Symbol;Acc:1561740]                                                              | 1 |
| ENSRNOG0000000023993  | 16504.16 | 14967.70 | 18040.62 | 1.21 | 0.27  | 0.000257 | 0.002749128  | Kif1a   | kinesin family member 1A [Source:RGD Symbol;Acc:1304996]                                                               | 2 |
| ENSRNOG0000000020281  | 92.07    | 105.67   | 78.46    | 0.74 | -0.43 | 0.043634 | 0.167936187  | Kif22   | kinesin family member 22 [Source:RGD Symbol;Acc:1311886]                                                               | 2 |
| ENSRNOG00000000014080 | 60.65    | 79.12    | 42.18    | 0.53 | -0.91 | 0.000188 | 0.00210111   | Kif23   | kinesin family member 23 [Source:RGD Symbol;Acc:1308596]                                                               | 2 |
| ENSRNOG0000000011394  | 7088.71  | 6572.40  | 7605.01  | 1.16 | 0.21  | 0.004174 | 0.027327131  | Kif3c   | kinesin family member 3C [Source:RGD Symbol;Acc:621538]                                                                | 2 |
| ENSRNOG0000000000479  | 110.47   | 143.41   | 77.54    | 0.54 | -0.89 | 1.90E-05 | 0.000277385  | Kifc1   | kinesin family member C1 [Source:RGD Symbol;Acc:1359118]                                                               | 2 |
| ENSRNOG0000000031748  | 2121.88  | 2114.77  | 2128.98  | 1.01 | 0.01  | 0.89748  |              | 1 Kifc2 | kinesin family member C2 [Source:RGD Symbol;Acc:735021]                                                                | 2 |
| ENSRNOG0000000014087  | 1138.80  | 1228.29  | 1049.31  | 0.85 | -0.23 | 0.018658 | 0.089164846  | Kifc3   | kinesin family member C3 [Source:RGD Symbol;Acc:1307693]                                                               | 2 |
| ENSRNOG0000000026690  | 248.71   | 247.62   | 249.80   | 1.01 | 0.01  | 0.956979 |              | 1 Kin   | antigenic determinant of rec-A protein homolog (mouse) [Source:RGD Symbol;Acc:1596107]                                 | 2 |
| ENSRNOG0000000002227  | 948.40   | 880.31   | 1016.50  | 1.15 | 0.21  | 0.033513 | 0.138192053  | Kit     | v-kit Hardy-Zuckerman 4 feline sarcoma viral oncogene homolog [Source:RGD Symbol;Acc:620568]                           | 1 |
| ENSRNOG0000000001092  | 7.64     | 5.72     | 9.56     | 1.67 | 0.74  | 0.171955 | 0.434463396  | Klc     | Klotho [Source:RGD Symbol;Acc:620396]                                                                                  | 3 |
| ENSRNOG0000000018168  | 1486.82  | 1561.30  | 1412.34  | 0.90 | -0.14 | 0.121674 | 0.345780483  | Klc4    | kinesin light chain 4 [Source:RGD Symbol;Acc:1306555]                                                                  | 2 |
| ENSRNOG0000000033443  | 71.71    | 102.10   | 41.31    | 0.40 | -1.31 | 2.82E-08 | 7.44E-07     | Klf1    | Kruppel-like factor 1 (erythroid) [Source:RGD Symbol;Acc:1309398]                                                      | 2 |
| ENSRNOG0000000006118  | 610.81   | 649.60   | 572.02   | 0.88 | -0.18 | 0.107333 | 0.318019318  | Klf10   | Kruppel-like factor 10 [Source:RGD Symbol;Acc:621652]                                                                  | 2 |
| ENSRNOG0000000008785  | 382.75   | 405.88   | 359.62   | 0.89 | -0.17 | 0.221629 | 0.509178545  | Klf5    | Kruppel-like factor 5 [Source:RGD Symbol;Acc:621446]                                                                   | 5 |
| ENSRNOG0000000012961  | 242.17   | 190.14   | 294.21   | 1.55 | 0.63  | 3.76E-05 | 0.000513372  | Klf7    | Kruppel-like factor 7 (ubiquitous) [Source:RGD Symbol;Acc:1306029]                                                     | 6 |
| ENSRNOG0000000039057  | 18.28    | 13.55    | 23.01    | 1.70 | 0.76  | 0.029405 | 0.12551476   | Klf8    | Kruppel-like factor 8 [Source:RGD Symbol;Acc:1565831]                                                                  | 2 |
| ENSRNOG0000000047867  | 2090.32  | 2212.13  | 1968.52  | 0.89 | -0.17 | 0.04636  | 0.174969897  | Klhd8b  | kelch domain containing 8B [Source:RGD Symbol;Acc:1359445]                                                             | 2 |
| ENSRNOG0000000031100  | 44.96    | 36.95    | 52.97    | 1.43 | 0.52  | 0.071729 | 0.23985915   | Klhl1   | kelch-like family member 1 [Source:RGD Symbol;Acc:1307452]                                                             | 1 |
| ENSRNOG0000000029441  | 891.00   | 815.47   | 966.53   | 1.19 | 0.25  | 0.017485 | 0.085025998  | Klhl2   | kelch-like family member 2 [Source:RGD Symbol;Acc:1306388]                                                             | 5 |
| ENSRNOG0000000005371  | 857.23   | 803.11   | 911.35   | 1.13 | 0.18  | 0.078074 | 0.254499551  | Klhl29  | kelch-like family member 29 [Source:RGD Symbol;Acc:1311076]                                                            | 3 |
| ENSRNOG0000000017365  | 61.21    | 66.02    | 56.41    | 0.85 | -0.23 | 0.367427 | 0.683448942  | Klhl35  | kelch-like family member 35 [Source:RGD Symbol;Acc:1565895]                                                            | 2 |
| ENSRNOG0000000008421  | 691.36   | 662.81   | 719.90   | 1.09 | 0.12  | 0.289538 | 0.596205876  | Klhl5   | kelch-like family member 5 [Source:RGD Symbol;Acc:1309661]                                                             | 5 |
| ENSRNOG0000000006335  | 3992.23  | 3616.51  | 4367.95  | 1.21 | 0.27  | 0.000526 | 0.004997117  | Klhl9   | kelch-like family member 9 [Source:RGD Symbol;Acc:1304814]                                                             | 1 |
| ENSRNOG0000000032857  | 0.75     | 0.29     | 1.21     | 1.49 | 2.07  | 0.283035 | 0.5885648363 | Klik1c9 | kallikrein 1-related peptidase C9 [Source:RGD Symbol;Acc:727805]                                                       | 2 |
| ENSRNOG0000000033658  | 177.50   | 163.17   | 191.82   | 1.18 | 0.23  | 0.159874 | 0.414262351  | Kntc1   | kinetochore associated 1 [Source:RGD Symbol;Acc:1307905]                                                               | 6 |
| ENSRNOG0000000015329  | 57.81    | 64.66    | 50.95    | 0.79 | -0.34 | 0.179208 | 0.445925285  | Kpna2   | karyopherin alpha 2 [Source:RGD Symbol;Acc:621419]                                                                     | 1 |
| ENSRNOG0000000009338  | 508.68   | 442.32   | 575.04   | 1.30 | 0.38  | 0.001943 | 0.01476324   | Kras    | Kirsten rat sarcoma viral oncogene [Source:RGD Symbol;Acc:2981]                                                        | 2 |
| ENSRNOG0000000007937  | 1334.58  | 1291.34  | 1377.82  | 1.07 | 0.09  | 0.357687 | 0.672987916  | Krit1   | KRIT1, ankyrin repeat containing [Source:RGD Symbol;Acc:1305929]                                                       | 1 |
| ENSRNOG0000000011628  | 40.51    | 40.11    | 40.91    | 1.02 | 0.03  | 0.994593 |              | 1 Krt27 | keratin 27 [Source:RGD Symbol;Acc:1359115]                                                                             | 5 |
| ENSRNOG0000000029993  | 6.34     | 7.38     | 5.31     | 0.72 | -0.47 | 0.389033 | 0.705995696  | Kynu    | kyunreninase [Source:RGD Symbol;Acc:71061]                                                                             | 3 |
| ENSRNOG0000000037274  | 14297.69 | 11941.86 | 16653.52 | 1.39 | 0.48  | 1.76E-10 | 6.72E-09     | L1cam   | L1 cell adhesion molecule [Source:RGD Symbol;Acc:619777]                                                               | 1 |
| ENSRNOG0000000018081  | 428.64   | 440.88   | 416.40   | 0.94 | -0.08 | 0.516307 | 0.816443384  | Lactb   | lactamase, beta [Source:RGD Symbol;Acc:1304788]                                                                        | 2 |
| ENSRNOG0000000005099  | 3521.96  | 4071.83  | 2972.09  | 0.73 | -0.45 | 7.96E-09 | 2.34E-07     | Lama4   | laminin, alpha 4 [Source:RGD Symbol;Acc:1560062]                                                                       | 1 |
| ENSRNOG0000000007232  | 0.82     | 0.99     | 0.65     | 0.66 | -0.61 | 0.925848 |              | 1 Lao1  | L-amino acid oxidase 1 [Source:RGD Symbol;Acc:1310787]                                                                 | 3 |
| ENSRNOG000000003289   | 2712.47  | 2681.31  | 2743.64  | 1.02 | 0.03  | 0.705838 | 0.953304618  | Lap3    | leucine aminopeptidase 3 [Source:RGD Symbol;Acc:1307985]                                                               | 2 |
| ENSRNOG0000000010544  | 2298.06  | 2040.91  | 2555.22  | 1.25 | 0.32  | 9.75E-05 | 0.001176324  | Lats2   | large tumor suppressor kinase 2 [Source:RGD Symbol;Acc:1305906]                                                        | 1 |
| ENSRNOG0000000039902  | 3700.84  | 4033.69  | 3367.99  | 0.83 | -0.26 | 0.000815 | 0.007216669  | Lbh     | limb bud and heart development [Source:RGD Symbol;Acc:1584525]                                                         | 2 |
| ENSRNOG000000003103   | 285.36   | 327.05   | 243.68   | 0.75 | -0.42 | 0.004044 | 0.026657426  | Lbr     | lamin B receptor [Source:RGD Symbol;Acc:620813]                                                                        | 2 |
| ENSRNOG0000000009580  | 91.32    | 79.70    | 102.93   | 1.29 | 0.37  | 0.071093 | 0.23798137   | Lca5    | Leber congenital amaurosis 5 [Source:RGD Symbol;Acc:1308555]                                                           | 2 |
| ENSRNOG0000000009705  | 68.99    | 76.45    | 61.54    | 0.80 | -0.31 | 0.175284 | 0.439505256  | Lck     | LCK proto-oncogene, Src family tyrosine kinase [Source:RGD Symbol;Acc:2994]                                            | 2 |
| ENSRNOG0000000034026  | 243.03   | 198.27   | 287.78   | 1.45 | 0.54  | 0.000488 | 0.004682307  | Lclat1  | lysocardiolipin acyltransferase 1 [Source:RGD Symbol;Acc:1565906]                                                      | 5 |
| ENSRNOG0000000003787  | 68.38    | 57.79    | 78.97    | 1.37 | 0.45  | 0.0592   | 0.209548932  | Lcor1   | ligand dependent nuclear receptor corepressor-like [Source:RGD Symbol;Acc:1561241]                                     | 2 |
| ENSRNOG0000000003205  | 2204.44  | 2055.62  | 2353.26  | 1.14 | 0.20  | 0.026056 | 0.11500286   | Ldb2    | LIM domain binding 2 [Source:RGD Symbol;Acc:1307921]                                                                   | 5 |
| ENSRNOG0000000010121  | 79.47    | 78.95    | 79.99    | 1.01 | 0.02  | 0.842935 |              | 1 Lef1  | lymphoid enhancer binding factor 1 [Source:RGD Symbol;Acc:620241]                                                      | 1 |
| ENSRNOG0000000051244  | 1.89     | 2.02     | 1.76     | 0.87 | -0.20 | 0.899922 |              | 1 Lemd1 | LEM domain containing 1 [Source:MGI Symbol;Acc:MG1:1922403]                                                            | 3 |
| ENSRNOG0000000018642  | 8039.55  | 9015.80  | 7063.31  | 0.78 | -0.35 | 4.04E-06 | 6.96E-05     | Lang8   | leukocyte receptor cluster (LRC) member 8 [Source:RGD Symbol;Acc:1306180]                                              | 2 |
| ENSRNOG0000000010116  | 2128.14  | 2104.03  | 2152.26  | 1.02 | 0.03  | 0.713115 | 0.957893856  | Leo1    | Leo1, Paf1/RNA polymerase II complex component, homolog (S. cerevisiae) [Source:RGD Symbol;Acc:154                     | 2 |
| ENSRNOG0000000023664  | 260.13   | 324.46   | 195.80   | 0.60 | -0.73 | 3.33E-06 | 5.91E-05     | Lepr    | leptin receptor [Source:RGD Symbol;Acc:3001]                                                                           | 1 |
| ENSRNOG0000000026180  | 625.69   | 602.66   | 648.72   | 1.08 | 0.11  | 0.353561 | 0.671171614  | Letm2   | leucine zipper-EF-hand containing transmembrane protein 2 [Source:RGD Symbol;Acc:1311220]                              | 1 |
| ENSRNOG0000000009884  | 23175.70 | 23484.64 | 2286.77  | 0.97 | -0.04 | 0.620815 | 0.982665758  | Lgals1  | lectin, galactoside-binding, soluble, 1 [Source:RGD Symbol;Acc:69355]                                                  | 2 |
| ENSRNOG0000000010645  | 4080.62  | 4012.73  | 4148.51  | 1.03 | 0.05  | 0.659137 | 0.922466912  | Lgals3  | lectin, galactoside-binding, soluble, 3 [Source:RGD Symbol;Acc:69356]                                                  | 2 |
| ENSRNOG0000000012681  | 618.55   | 642.03   | 595.07   | 0.93 | -0.11 | 0.369426 | 0.685564657  | Lgals9  | lectin, galactoside-binding, soluble, 9 [Source:RGD Symbol;Acc:3005]                                                   | 5 |
| ENSRNOG0000000011696  | 1496.77  | 1133.47  | 1860.08  | 1.64 | 0.71  | 2.00E-16 | 1.28E-14     | Lifr    | leukemia inhibitory factor receptor alpha [Source:RGD Symbol;Acc:621431]                                               | 2 |
| ENSRNOG0000000014193  | 160.41   | 181.49   | 139.34   | 0.77 | -0.38 | 0.037094 | 0.149099347  | Lig1    | ligase I, DNA, ATP-dependent [Source:RGD Symbol;Acc:621424]                                                            | 5 |
| ENSRNOG0000000049336  | 608.55   | 672.56   | 544.54   | 0.81 | -0.30 | 0.010061 | 0.05528066   | Lime1   | Lck interacting transmembrane adaptor 1 [Source:RGD Symbol;Acc:1562795]                                                | 5 |
| ENSRNOG0000000025938  | 18.40    | 13.38    | 23.42    | 1.75 | 0.81  | 0.025392 | 0.112707836  | Lin28b  | lin-28 homolog B (C. elegans) [Source:RGD Symbol;Acc:1597432]                                                          |   |

|                     |          |          |          |      |        |          |             |          |                                                                                                        |   |
|---------------------|----------|----------|----------|------|--------|----------|-------------|----------|--------------------------------------------------------------------------------------------------------|---|
| ENSRNOG00000011349  | 702.59   | 646.17   | 759.01   | 1.17 | 0.23   | 0.032374 | 0.134793402 | Lonrf1   | LON peptidase N-terminal domain and ring finger 1 [Source:RGD Symbol;Acc:1562583]                      | 2 |
| ENSRNOG00000015260  | 419.95   | 426.48   | 413.42   | 0.97 | -0.04  | 0.773638 | 0.994522254 | Lpar3    | lysophosphatidic acid receptor 3 [Source:RGD Symbol;Acc:620565]                                        | 5 |
| ENSRNOG00000021401  | 163.09   | 170.60   | 155.58   | 0.91 | -0.13  | 0.498021 | 0.802130529 | Lpar5    | lysophosphatidic acid receptor 5 [Source:RGD Symbol;Acc:1562580]                                       | 5 |
| ENSRNOG00000012269  | 1223.72  | 1200.52  | 1246.92  | 1.04 | 0.05   | 0.498963 | 0.802093667 | Lpcat3   | lysophosphatidylcholine acyltransferase 3 [Source:RGD Symbol;Acc:1310223]                              | 2 |
| ENSRNOG0000001402   | 1480.39  | 1601.63  | 1359.15  | 0.85 | -0.24  | 0.009803 | 0.054318978 | Lrch4    | leucine-rich repeats and calponin homology (CH) domain containing 4 [Source:RGD Symbol;Acc:1306145]    | 2 |
| ENSRNOG00000025053  | 5371.41  | 5895.46  | 4847.37  | 0.82 | -0.28  | 0.000211 | 0.002315431 | Lrp1     | low density lipoprotein receptor-related protein 1 [Source:RGD Symbol;Acc:1307535]                     | 1 |
| ENSRNOG00000013064  | 423.84   | 362.98   | 484.70   | 1.34 | 0.42   | 0.001019 | 0.00865519  | Lrp8     | low density lipoprotein receptor-related protein 8, apolipoprotein E receptor [Source:RGD Symbol;Acc:1 | 2 |
| ENSRNOG00000030180  | 43.49    | 46.31    | 40.67    | 0.88 | -0.19  | 0.463754 | 0.77942362  | Lrrc10b  | leucine rich repeat containing 10B [Source:RGD Symbol;Acc:1564983]                                     | 5 |
| ENSRNOG00000025518  | 2880.42  | 2856.20  | 2904.63  | 1.02 | 0.02   | 0.730298 | 0.968784191 | Lrrc16b  | leucine rich repeat containing 16B [Source:RGD Symbol;Acc:1359120]                                     | 2 |
| ENSRNOG0000001217   | 281.64   | 275.93   | 287.36   | 1.04 | 0.06   | 0.679861 | 0.937060064 | Lrrc3    | leucine rich repeat containing 3 [Source:RGD Symbol;Acc:628861]                                        | 5 |
| ENSRNOG00000027971  | 52.41    | 50.68    | 54.14    | 1.07 | 0.10   | 0.623026 | 0.894376912 | Lrrc31   | leucine rich repeat containing 31 [Source:RGD Symbol;Acc:1561499]                                      | 3 |
| ENSRNOG00000045926  | 1281.44  | 1368.17  | 1194.71  | 0.87 | -0.20  | 0.032147 | 0.134110801 | Lrrc45   | leucine rich repeat containing 45 [Source:RGD Symbol;Acc:1590053]                                      | 2 |
| ENSRNOG00000046428  | 255.45   | 127.77   | 383.14   | 3.00 | 1.58   | 6.64E-24 | 6.35E-22    | Lrrc75b  | leucine rich repeat containing 75B [Source:RGD Symbol;Acc:2318441]                                     | 2 |
| ENSRNOG00000002129  | 634.59   | 518.40   | 750.79   | 1.45 | 0.53   | 1.13E-06 | 2.22E-05    | Lrrc8b   | leucine rich repeat containing 8 family, member B [Source:RGD Symbol;Acc:1563429]                      | 2 |
| ENSRNOG000000002121 | 2293.86  | 2187.40  | 2400.33  | 1.10 | 0.13   | 0.123481 | 0.34737364  | Lrrc8d   | leucine rich repeat containing 8 family, member D [Source:RGD Symbol;Acc:1309601]                      | 2 |
| ENSRNOG00000032989  | 1.88     | 2.27     | 1.48     | 0.65 | -0.61  | 0.561678 | 0.846180075 | Lrrn4    | leucine rich repeat neuronal 4 [Source:RGD Symbol;Acc:1305256]                                         | 2 |
| ENSRNOG00000032989  | 1.88     | 2.27     | 1.48     | 0.65 | -0.61  | 0.561678 | 0.846180075 | Lrrn4    | leucine rich repeat neuronal 4 [Source:RGD Symbol;Acc:1305256]                                         | 2 |
| ENSRNOG0000001429   | 644.68   | 728.78   | 560.57   | 0.77 | -0.38  | 0.000906 | 0.00783853  | Lrwd1    | leucine-rich repeats and WD repeat domain containing 1 [Source:RGD Symbol;Acc:1359442]                 | 3 |
| ENSRNOG00000039110  | 0.23     | 0.24     | 0.22     | 0.93 | -0.10  | 1        | 1           | Lsmem1   | leucine-rich single-pass membrane protein 1 [Source:MGI Symbol;Acc:MGI:2685735]                        | 3 |
| ENSRNOG00000000855  | 16.20    | 23.59    | 8.81     | 0.37 | -1.42  | 0.00017  | 0.00192803  | Lst1     | leukocyte specific transcript 1 [Source:RGD Symbol;Acc:620077]                                         | 1 |
| ENSRNOG00000000838  | 1.74     | 2.18     | 1.30     | 0.60 | -0.74  | 0.561093 | 0.845844693 | Lta      | lymphotoxin alpha [Source:RGD Symbol;Acc:3020]                                                         | 1 |
| ENSRNOG00000000836  | 49.80    | 67.75    | 31.85    | 0.47 | -1.09  | 2.42E-05 | 0.000346053 | Ltb      | lymphotoxin beta (TNF superfamily, member 3) [Source:RGD Symbol;Acc:1303162]                           | 1 |
| ENSRNOG00000015217  | 950.94   | 976.47   | 925.40   | 0.95 | -0.08  | 0.436142 | 0.755111842 | Ltv1     | LTV1 ribosome biogenesis factor [Source:RGD Symbol;Acc:1311264]                                        | 2 |
| ENSRNOG00000006001  | 2089.05  | 2103.47  | 2074.64  | 0.99 | -0.02  | 0.785839 | 1           | Luc7i2   | LUC7-like 2 (S. cerevisiae) [Source:RGD Symbol;Acc:1308651]                                            | 2 |
| ENSRNOG00000002835  | 2110.58  | 2129.44  | 2091.72  | 0.98 | -0.03  | 0.735605 | 0.972614496 | Luc7i3   | LUC7-like 3 (S. cerevisiae) [Source:RGD Symbol;Acc:1307981]                                            | 2 |
| ENSRNOG00000013572  | 7779.67  | 7443.43  | 8115.92  | 1.09 | 0.12   | 0.1093   | 0.322259147 | Lxn      | latexin [Source:RGD Symbol;Acc:68361]                                                                  | 7 |
| ENSRNOG00000000137  | 58.33    | 60.11    | 56.55    | 0.94 | -0.09  | 0.666733 | 0.927410259 | Ly86     | lymphocyte antigen 86 [Source:RGD Symbol;Acc:1309936]                                                  | 2 |
| ENSRNOG00000005374  | 414.55   | 437.84   | 391.26   | 0.89 | -0.16  | 0.197827 | 0.475010904 | Lyr      | Ly1 antibody reactive [Source:RGD Symbol;Acc:1305352]                                                  | 5 |
| ENSRNOG000000008180 | 196.16   | 245.68   | 146.64   | 0.60 | -0.74  | 7.22E-06 | 0.000115296 | Lyn      | LYN proto-oncogene, Src family tyrosine kinase [Source:RGD Symbol;Acc:621017]                          | 1 |
| ENSRNOG000000004614 | 53.84    | 60.55    | 47.12    | 0.78 | -0.36  | 0.151131 | 0.400401397 | Lypd6b   | LY6/PLAUR domain containing 6B [Source:RGD Symbol;Acc:1562767]                                         | 1 |
| ENSRNOG00000012662  | 1329.08  | 1081.59  | 1576.58  | 1.46 | 0.54   | 4.09E-09 | 1.27E-07    | Lyst     | lysosomal trafficking regulator [Source:MGI Symbol;Acc:MGI:107448]                                     | 2 |
| ENSRNOG00000032941  | 308.75   | 329.12   | 288.38   | 0.88 | -0.19  | 0.213375 | 0.497840296 | Mab21i1  | mab-21-like 1 (C. elegans) [Source:RGD Symbol;Acc:1589984]                                             | 5 |
| ENSRNOG00000012886  | 152.18   | 157.54   | 146.83   | 0.93 | -0.10  | 0.555764 | 0.840961435 | Maff     | v-maf avian musculoaponeurotic fibrosarcoma oncogene homolog F [Source:RGD Symbol;Acc:1309531]         | 2 |
| ENSRNOG00000036697  | 895.12   | 930.28   | 859.96   | 0.92 | -0.11  | 0.300875 | 0.608581263 | Mafg     | v-maf avian musculoaponeurotic fibrosarcoma oncogene homolog G [Source:RGD Symbol;Acc:619953]          | 2 |
| ENSRNOG0000001277   | 760.83   | 763.47   | 758.18   | 0.99 | -0.01  | 0.885093 | 1           | Mafk     | v-maf avian musculoaponeurotic fibrosarcoma oncogene homolog K [Source:RGD Symbol;Acc:628633]          | 3 |
| ENSRNOG00000010158  | 11.92    | 9.80     | 14.04    | 1.43 | 0.52   | 0.25265  | 0.550212729 | Magel2   | MAGE-like 2 [Source:RGD Symbol;Acc:1583615]                                                            | 2 |
| ENSRNOG00000022060  | 2022.49  | 1914.99  | 2129.99  | 1.11 | 0.15   | 0.05874  | 0.208375821 | Magi1    | membrane associated guanylate kinase, WW and PDZ domain containing 1 [Source:RGD Symbol;Acc:158        | 2 |
| ENSRNOG00000019885  | 3361.59  | 2821.61  | 3901.56  | 1.38 | 0.47   | 4.24E-09 | 1.32E-07    | Magi3    | membrane associated guanylate kinase, WW and PDZ domain containing 3 [Source:RGD Symbol;Acc:621        | 5 |
| ENSRNOG000000008615 | 218.14   | 193.33   | 242.95   | 1.26 | 0.33   | 0.047624 | 0.17852301  | Mal2     | Mal, T-cell differentiation protein 2 [Source:RGD Symbol;Acc:735066]                                   | 2 |
| ENSRNOG00000017087  | 1083.67  | 1036.92  | 1130.43  | 1.09 | 0.12   | 0.192921 | 0.467341704 | Man1c1   | mannosidase, alpha, class 1C, member 1 [Source:RGD Symbol;Acc:1309672]                                 | 2 |
| ENSRNOG00000014201  | 1671.04  | 1614.09  | 1728.00  | 1.07 | 0.10   | 0.310105 | 0.619914736 | Manf     | mesencephalic astrocyte-derived neurotrophic factor [Source:RGD Symbol;Acc:1307252]                    | 2 |
| ENSRNOG000000002848 | 1562.55  | 1504.12  | 1620.98  | 1.08 | 0.11   | 0.235517 | 0.528292936 | Maoa     | monoamine oxidase A [Source:RGD Symbol;Acc:61898]                                                      | 1 |
| ENSRNOG00000029778  | 3877.57  | 4102.97  | 3652.18  | 0.89 | -0.17  | 0.027637 | 0.120111728 | Maob     | monoamine oxidase B [Source:RGD Symbol;Acc:3041]                                                       | 1 |
| ENSRNOG00000010176  | 3597.69  | 3460.88  | 3734.50  | 1.08 | 0.11   | 0.156382 | 0.409245283 | Map2k1   | mitogen activated protein kinase 1 [Source:RGD Symbol;Acc:70495]                                       | 1 |
| ENSRNOG00000020005  | 3784.74  | 4078.96  | 3490.51  | 0.86 | -0.22  | 0.004224 | 0.027595881 | Map2k2   | mitogen activated protein kinase 2 [Source:RGD Symbol;Acc:61888]                                       | 1 |
| ENSRNOG00000016378  | 59.16    | 67.55    | 50.76    | 0.75 | -0.41  | 0.08622  | 0.27328668  | Map3k8   | mitogen-activated protein kinase kinase 8 [Source:RGD Symbol;Acc:620969]                               | 1 |
| ENSRNOG00000027204  | 4410.65  | 4481.74  | 4339.56  | 0.97 | -0.05  | 0.557634 | 0.8425025   | Map6     | microtubule-associated protein 6 [Source:RGD Symbol;Acc:61804]                                         | 1 |
| ENSRNOG00000012701  | 1617.18  | 1343.03  | 1891.34  | 1.41 | 0.49   | 1.87E-08 | 5.14E-07    | Map7     | microtubule-associated protein 7 [Source:RGD Symbol;Acc:1308666]                                       | 2 |
| ENSRNOG00000018149  | 4716.14  | 4190.14  | 5242.14  | 1.25 | 0.32   | 2.29E-05 | 0.000328699 | Mapk1    | mitogen activated protein kinase 1 [Source:RGD Symbol;Acc:70500]                                       | 1 |
| ENSRNOG0000002079   | 4967.89  | 4419.65  | 5516.14  | 1.25 | 0.32   | 2.31E-05 | 0.00032164  | Mapk10   | mitogen activated protein kinase 10 [Source:RGD Symbol;Acc:3663]                                       | 1 |
| ENSRNOG00000006984  | 3846.45  | 3886.88  | 3806.02  | 0.98 | -0.03  | 0.659281 | 0.922538107 | Mapk11   | mitogen-activated protein kinase 11 [Source:RGD Symbol;Acc:1309340]                                    | 6 |
| ENSRNOG00000000515  | 32.78    | 38.86    | 26.71    | 0.69 | -0.54  | 0.069497 | 0.234127661 | Mapk13   | mitogen activated protein kinase 13 [Source:RGD Symbol;Acc:3045]                                       | 4 |
| ENSRNOG00000000513  | 2457.92  | 2511.22  | 2404.62  | 0.96 | -0.06  | 0.448345 | 0.765075566 | Mapk14   | mitogen activated protein kinase 14 [Source:RGD Symbol;Acc:70496]                                      | 1 |
| ENSRNOG00000016935  | 744.53   | 761.55   | 727.51   | 0.96 | -0.07  | 0.515188 | 0.815288348 | Mapk1p1  | mitogen-activated protein kinase 1 interacting protein 1 [Source:RGD Symbol;Acc:1565431]               | 2 |
| ENSRNOG00000019601  | 18680.81 | 18778.48 | 18583.15 | 0.99 | -0.02  | 0.847073 | 1           | Mapk3    | mitogen activated protein kinase 3 [Source:RGD Symbol;Acc:3046]                                        | 1 |
| ENSRNOG00000015401  | 305.66   | 276.49   | 334.84   | 1.21 | 0.28   | 0.055915 | 0.20117068  | Mapk4    | mitogen-activated protein kinase 4 [Source:RGD Symbol;Acc:3047]                                        | 5 |
| ENSRNOG00000020412  | 0.13     | 0.27     | 0.00     | 0.00 | #NAME? | 0.964516 | 1           | Mapk7    | mitogen-activated protein kinase 7 [Source:RGD Symbol;Acc:621505]                                      | 2 |
| ENSRNOG00000020155  | 685.90   | 579.50   | 792.31   | 1.37 | 0.45   | 6.18E-05 | 0.000794618 | Mapk8    | mitogen-activated protein kinase 8 [Source:RGD Symbol;Acc:621506]                                      | 1 |
| ENSRNOG000000002823 | 3348.94  | 2973.61  | 3724.26  | 1.25 | 0.32   | 3.78E-05 | 0.00051579  | Mapk9    | mitogen-activated protein kinase 9 [Source:RGD Symbol;Acc:628847]                                      | 1 |
| ENSRNOG0000001345   | 1427.35  | 1453.32  | 1401.37  | 0.96 | -0.05  | 0.554819 | 0.840485067 | Mapkap5  | mitogen-activated protein kinase-activated protein kinase 5 [Source:RGD Symbol;Acc:1564113]            | 2 |
| ENSRNOG00000018340  | 56.84    | 53.16    | 60.51    | 1.14 | 0.19   | 0.451532 | 0.767659038 | Marveld2 | MARVEL domain containing 2 [Source:RGD Symbol;Acc:1306909]                                             | 2 |
| ENSRNOG00000016291  | 7.24     | 7.38     | 7.10     | 0.96 | -0.06  | 1        | 1           | Marveld3 | MARVEL domain containing 3 [Source:RGD Symbol;Acc:1562056]                                             | 2 |
| ENSRNOG0000001827   | 451.07   | 420.68   | 481.45   | 1.14 | 0.19   | 0.120526 | 0.343593676 | Masp1    | mannan-binding lectin serine peptidase 1 [Source:RGD Symbol;Acc:620213]                                | 3 |
| ENSRNOG00000024040  | 391.29   | 380.85   | 401.74   | 1.05 | 0.08   | 0.563564 | 0.847855006 | Mb21d2   | Mab-21 domain containing 2 [Source:RGD Symbol;Acc:1559643]                                             | 2 |
| ENSRNOG00000010737  | 2225.78  | 1699.03  | 2752.52  | 1.62 | 0.70   | 3.43E-17 | 2.32E-15    | Mbnl2    | muscleblind-like splicing regulator 2 [Source:RGD Symbol;Acc:1591755]                                  | 2 |
| ENSRNOG00000038193  | 6.09     | 4.35     | 7.82     | 1.80 | 0.85   | 0.164908 | 0.422097785 | Mcc1r    | melanocortin 1 receptor [Source:RGD Symbol;Acc:1312046]                                                | 3 |
| ENSRNOG000000004451 | 0.25     | 0.51     | 0.00     | 0.00 | #NAME? | 0.474445 | 0.780237584 | Mcc3r    | melanocortin 3 receptor [Source:RGD Symbol;Acc:3056]                                                   | 1 |
| ENSRNOG00000018692  | 6.36     | 6.10     | 6.62     | 1.08 | 0.12   | 0.894712 | 1           | Mcc4r    | melanocortin 4 receptor [Source:RGD Symbol;Acc:3057]                                                   | 1 |
| ENSRNOG00000017752  | 960.90   | 1003.56  | 918.24   | 0.91 | -0.13  | 0.190303 | 0.463026452 | Mccc2    | methylcrotonoyl-CoA carboxylase 2 (beta) [Source:RGD Symbol;Acc:1310279]                               | 1 |
| ENSRNOG00000028426  | 2949.87  | 2825.12  | 3074.62  | 1.09 | 0.12   | 0.112535 | 0.328187647 | Mcf2l    | MCF-2 cell line derived transforming sequence-like [Source:RGD Symbol;Acc:619782]                      | 6 |
| ENSRNOG00000015059  | 271.03   | 286.64   | 255.42   | 0.89 | -0.17  | 0.309062 | 0.61875903  | Mcfd2    | multiple coagulation factor deficiency 2 [Source:RGD Symbol;Acc:628690]                                | 2 |
| ENSRNOG00000016316  | 360.57   | 420.85   | 300.30   | 0.71 | -0.49  | 0.000616 | 0.005694246 | Mcm2     | minichromosome maintenance complex component 2 [Source:RGD Symbol;Acc:1305577]                         | 2 |
| ENSRNOG00000014336  | 145.34   | 182.46   | 108.22   | 0.59 | -0.75  | 4.67E-05 | 0.000623635 | Mcm5     | minichromosome maintenance complex component 5 [Source:RGD Symbol;Acc:1306616]                         | 2 |
| ENSRNOG00000001349  | 673.68   | 801.26   | 546.11   | 0.68 | -0.55  | 8.11E-07 | 1.65E-05    | Mcm7     | minichromosome maintenance complex component 7 [Source:RGD Symbol;Acc:1303018]                         | 2 |
| ENSRNOG00000032813  | 351.91   | 360.82   | 342.99   | 0.95 | -0.07  | 0.670357 | 0.93028432  | Mdc1     | mediator of DNA damage checkpoint 1 [Source:RGD Symbol;Acc:1559468]                                    | 1 |
| ENSRNOG00000037262  | 90.53    | 81.92    | 99.13    | 1.21 | 0.28   | 0.15707  | 0.41007577  | Mecp2    | methyl CpG binding protein 2 [Source:RGD Symbol;Acc:3075]                                              | 1 |
| ENSRNOG00000017150  | 972.42   | 966.54   | 978.30   | 1.01 | 0.02   | 0.879862 | 1           | Med10    | mediator complex subunit 10 [Source:RGD Symbol;Acc:1310128]                                            | 2 |
| ENSRNOG00000019384  | 433.22   | 434.64   | 431.80   | 0.99 | -0.01  | 0.907891 | 1           | Med11    | mediator complex subunit 11 [Source:RGD Symbol;Acc:1563202]                                            | 2 |
| ENSRNOG00000047756  | 825.51   | 732.35   | 918.68   | 1.25 | 0.33   | 0.001477 | 0.011660719 | Mef2a    | myocyte enhancer factor 2a [Source:RGD Symbol;Acc:1359360]                                             | 2 |
| ENSRNOG0000007003   | 19.44    | 20.27    | 18.62    | 0.92 | -0.12  | 0.846828 | 1           | Mei1     | meiosis inhibitor 1 [Source:RGD Symbol;Acc:1307210]                                                    | 3 |
| ENSRNOG00000021390  | 930.79   | 959.41   | 902.18   | 0.94 | -0.09  | 0.389399 | 0.706354899 | Meis3    | Meis homeobox 3 [Source:RGD Symbol;Acc:1308532]                                                        | 2 |
| ENSRNOG00000012349  | 752.21   | 747.20   | 757.22   | 1.01 | 0.02   | 0.844408 | 1           | Meisd1   | mesoderm development candidate 1 [Source:RGD Symbol;Acc:1311666]                                       | 5 |
| ENSRNOG00000025142  | 195.95   | 183.94   | 207.96   | 1.13 | 0.18   | 0.295665 | 0.601865666 | Mex3b    | mex-3 RNA binding family member B [Source:RGD Symbol;Acc:1306790]                                      | 2 |
| ENSRNOG00000030830  | 584.67   | 583.11   | 586.23   | 1.01 | 0.01   | 0.918715 | 1           | Mex3d    | mex-3 RNA binding family member D [Source:RGD Symbol;Acc:1310576]                                      | 2 |
| ENSRNOG00000001739  | 13.55    | 10.98    | 16.12    |      |        |          |             |          |                                                                                                        |   |

|                      |           |           |          |       |       |           |             |         |                                                                                                                                 |   |
|----------------------|-----------|-----------|----------|-------|-------|-----------|-------------|---------|---------------------------------------------------------------------------------------------------------------------------------|---|
| ENSRNOG00000003508   | 7764.45   | 7659.30   | 7869.61  | 1.03  | 0.04  | 0.560113  | 0.844916287 | Mink1   | missshapen-like kinase 1 [Source:RGD Symbol;Acc:1359135]                                                                        | 2 |
| ENSRNOG000000035654  | 0.13      | 0.00      | 0.27     | Inf   | Inf   | 1         | 1           | Mir99b  | microRNA 99b [Source:RGD Symbol;Acc:2325431]                                                                                    | 2 |
| ENSRNOG000000028137  | 194.05    | 255.38    | 132.73   | 0.52  | -0.94 | 3.65E-08  | 9.40E-07    | Mki67   | marker of proliferation Ki-67 [Source:RGD Symbol;Acc:1305476]                                                                   | 2 |
| ENSRNOG000000009280  | 2174.72   | 2231.60   | 2117.83  | 0.95  | -0.08 | 0.375485  | 0.691862164 | Mkrrn1  | makorin ring finger protein 1 [Source:RGD Symbol;Acc:1303251]                                                                   | 2 |
| ENSRNOG000000022249  | 1078.98   | 1107.34   | 1050.61  | 0.95  | -0.08 | 0.443362  | 0.762775904 | Mllt10  | myeloid/lymphoid or mixed-lineage leukemia (trithorax homolog, Drosophila); translocated to, 10 [Source:RGD Symbol;Acc:1303251] | 2 |
| ENSRNOG000000009514  | 671.27    | 689.50    | 653.04   | 0.95  | -0.08 | 0.505886  | 0.808208413 | Mme     | membrane metallo-endopeptidase [Source:RGD Symbol;Acc:3098]                                                                     | 2 |
| ENSRNOG000000023643  | 238.98    | 240.70    | 237.26   | 0.99  | -0.02 | 0.916114  | 1           | Mmp17   | matrix metalloproteinase 17 [Source:RGD Symbol;Acc:1311541]                                                                     | 1 |
| ENSRNOG000000047028  | 2888.98   | 2816.66   | 2961.30  | 1.05  | 0.07  | 0.373465  | 0.689833011 | Mmp24   | matrix metalloproteinase 24 [Source:RGD Symbol;Acc:620202]                                                                      | 1 |
| ENSRNOG000000029621  | 1541.47   | 1406.44   | 1676.50  | 1.19  | 0.25  | 0.00356   | 0.023989016 | Mmp25   | matrix metalloproteinase 25 [Source:MGI Symbol;Acc:MGI:2443938]                                                                 | 5 |
| ENSRNOG000000017539  | 116.87    | 230.12    | 3.61     | 0.02  | -5.99 | 6.94E-87  | 3.44E-84    | Mmp9    | matrix metalloproteinase 9 [Source:RGD Symbol;Acc:621320]                                                                       | 1 |
| ENSRNOG00000006009   | 109.22    | 92.72     | 125.72   | 1.36  | 0.44  | 0.030718  | 0.129343353 | Mns1    | meiosis-specific nuclear structural 1 [Source:RGD Symbol;Acc:1549718]                                                           | 2 |
| ENSRNOG000000002894  | 1305.31   | 1288.72   | 1321.91  | 1.03  | 0.04  | 0.655503  | 0.919612803 | Mnt     | MAX network transcriptional repressor [Source:RGD Symbol;Acc:1308683]                                                           | 2 |
| ENSRNOG000000018971  | 1878.68   | 1930.68   | 1826.68  | 0.95  | -0.08 | 0.374092  | 0.690278429 | Mob3a   | MOB kinase activator 3A [Source:RGD Symbol;Acc:1308187]                                                                         | 2 |
| ENSRNOG000000018700  | 1065.13   | 22.27     | 2108.00  | 94.68 | 6.56  | 0         | 0           | Mobp    | myelin-associated oligodendrocyte basic protein [Source:RGD Symbol;Acc:3101]                                                    | 2 |
| ENSRNOG000000032101  | 14.16     | 13.12     | 15.20    | 1.16  | 0.21  | 0.611359  | 0.885428584 | Morc1   | MORC family CW-type zinc finger 1 [Source:RGD Symbol;Acc:1565610]                                                               | 3 |
| ENSRNOG00000002332   | 133.72    | 117.87    | 149.57   | 1.27  | 0.34  | 0.068677  | 0.232043482 | Mospd1  | motile sperm domain containing 1 [Source:RGD Symbol;Acc:1359486]                                                                | 2 |
| ENSRNOG000000015321  | 25.88     | 26.46     | 25.30    | 0.96  | -0.06 | 0.939861  | 1           | Moxd1   | monooxygenase, DBH-like 1 [Source:RGD Symbol;Acc:1310033]                                                                       | 1 |
| ENSRNOG000000007894  | 3169.98   | 3118.91   | 3221.04  | 1.03  | 0.05  | 0.527179  | 0.826844104 | Mpdz    | multiple PDZ domain protein [Source:RGD Symbol;Acc:3105]                                                                        | 5 |
| ENSRNOG000000008310  | 162.78    | 325.07    | 0.49     | 0.00  | -9.37 | 1.66E-132 | 1.59E-129   | Mpo     | myeloperoxidase [Source:RGD Symbol;Acc:1592081]                                                                                 | 1 |
| ENSRNOG000000018648  | 1083.69   | 1132.10   | 1035.27  | 0.91  | -0.13 | 0.199257  | 0.476973875 | Mppe1   | metallophosphoesterase 1 [Source:RGD Symbol;Acc:1309184]                                                                        | 3 |
| ENSRNOG000000010834  | 204.67    | 222.75    | 186.60   | 0.84  | -0.26 | 0.100891  | 0.304642924 | Mpped1  | metallophosphoesterase domain containing 1 [Source:RGD Symbol;Acc:1308244]                                                      | 3 |
| ENSRNOG000000004863  | 379.32    | 340.76    | 417.89   | 1.23  | 0.29  | 0.029429  | 0.12556482  | Mpped2  | metallophosphoesterase domain containing 2 [Source:RGD Symbol;Acc:735060]                                                       | 1 |
| ENSRNOG000000003171  | 594390.94 | 679752.27 | #####    | 0.75  | -0.42 | 0.033298  | 0.137469113 | Mpz     | myelin protein zero [Source:RGD Symbol;Acc:3109]                                                                                | 5 |
| ENSRNOG000000045955  | 1.18      | 0.85      | 1.51     | 1.78  | 0.83  | 0.612047  | 0.885939579 | Mrgbp   | MRG/MORF4L binding protein [Source:RGD Symbol;Acc:1308612]                                                                      | 2 |
| ENSRNOG00000003021   | 740.35    | 662.08    | 818.63   | 1.24  | 0.31  | 0.006125  | 0.037320717 | Mrgprb4 | MAS-related GPR, member B4 [Source:RGD Symbol;Acc:738043]                                                                       | 5 |
| ENSRNOG000000022703  | 24.27     | 18.36     | 30.17    | 1.64  | 0.72  | 0.033396  | 0.137763318 | Mrgprb5 | MAS-related G protein-coupled receptor, member B5 [Source:RGD Symbol;Acc:738052]                                                | 5 |
| ENSRNOG000000013448  | 354.08    | 345.57    | 362.59   | 1.05  | 0.07  | 0.647757  | 0.913963507 | Mrgprd  | MAS-related GPR, member D [Source:RGD Symbol;Acc:738040]                                                                        | 7 |
| ENSRNOG000000037156  | 0.13      | 0.00      | 0.26     | Inf   | Inf   | 1         | 1           | Mrgprx1 | MAS-related GPR, member X1 [Source:RGD Symbol;Acc:1591915]                                                                      | 5 |
| ENSRNOG000000027901  | 460.05    | 468.81    | 451.28   | 0.96  | -0.05 | 0.642075  | 0.909162966 | Mrm1    | mitochondrial rRNA methyltransferase 1 homolog (S. cerevisiae) [Source:RGD Symbol;Acc:1566232]                                  | 2 |
| ENSRNOG000000042327  | 1.39      | 1.59      | 1.19     | 0.75  | -0.42 | 0.911785  | 1           | Mroh2b  | maestro heat-like repeat family member 2B [Source:RGD Symbol;Acc:1305413]                                                       | 2 |
| ENSRNOG000000003724  | 1834.96   | 1885.51   | 1784.40  | 0.95  | -0.08 | 0.328507  | 0.640677602 | Mrp127  | mitochondrial ribosomal protein L27 [Source:RGD Symbol;Acc:1309090]                                                             | 2 |
| ENSRNOG000000002943  | 1314.17   | 1313.25   | 1315.09  | 1.00  | 0.00  | 0.974236  | 1           | Mrp155  | mitochondrial ribosomal protein L55 [Source:RGD Symbol;Acc:1308161]                                                             | 2 |
| ENSRNOG000000002010  | 1148.06   | 1135.13   | 1161.00  | 1.02  | 0.03  | 0.773022  | 0.994216327 | Mrp56   | mitochondrial ribosomal protein S6 [Source:RGD Symbol;Acc:2322928]                                                              | 2 |
| ENSRNOG000000036625  | 10.47     | 19.68     | 1.26     | 0.06  | -3.97 | 4.99E-12  | 2.19E-10    | Msa43   | membrane-spanning 4-domains, subfamily A, member 3 [Source:RGD Symbol;Acc:1310598]                                              | 5 |
| ENSRNOG000000009950  | 380.80    | 409.89    | 351.71   | 0.86  | -0.22 | 0.090773  | 0.283792501 | MSANTD2 | Protein Msantd2 [Source:UniProtKB/TrEMBL;Acc:F1LR51]                                                                            | 2 |
| ENSRNOG000000007540  | 155.75    | 154.06    | 157.45   | 1.02  | 0.03  | 0.867368  | 1           | Msc     | musculin [Source:RGD Symbol;Acc:1305496]                                                                                        | 5 |
| ENSRNOG0000000030118 | 10552.30  | 9470.77   | 11633.84 | 1.23  | 0.30  | 9.40E-05  | 0.001143325 | Msn     | moesin [Source:RGD Symbol;Acc:621260]                                                                                           | 1 |
| ENSRNOG000000032618  | 461.64    | 416.33    | 506.96   | 1.22  | 0.28  | 0.020467  | 0.095696357 | Mst1r   | macrophage stimulating 1 receptor (c-met-related tyrosine kinase) [Source:RGD Symbol;Acc:1306465]                               | 5 |
| ENSRNOG000000025527  | 1779.12   | 1671.90   | 1886.33  | 1.13  | 0.17  | 0.038571  | 0.153248882 | Mtdc1   | microtubule crosslinking factor 1 [Source:RGD Symbol;Acc:1308319]                                                               | 2 |
| ENSRNOG000000006870  | 364.42    | 355.61    | 373.23   | 1.05  | 0.07  | 0.580983  | 0.863308109 | Mtdhd   | metadherin [Source:RGD Symbol;Acc:620992]                                                                                       | 1 |
| ENSRNOG000000016937  | 3671.65   | 3613.29   | 3730.01  | 1.03  | 0.05  | 0.564342  | 0.848480852 | Mtfr1l  | mitochondrial fission regulator 1-like [Source:RGD Symbol;Acc:1305453]                                                          | 2 |
| ENSRNOG000000008553  | 401.82    | 438.83    | 364.81   | 0.83  | -0.27 | 0.059531  | 0.210364292 | Mtfrf   | methylene tetrahydrofolate reductase (NAD(P)H) [Source:RGD Symbol;Acc:1309952]                                                  | 1 |
| ENSRNOG00000002516   | 1006.50   | 997.61    | 1015.39  | 1.02  | 0.03  | 0.757113  | 0.995616711 | Mtm1    | myotubularin 1 [Source:RGD Symbol;Acc:1304582]                                                                                  | 2 |
| ENSRNOG00000002697   | 897.74    | 988.55    | 806.92   | 0.82  | -0.29 | 0.004606  | 0.029602868 | Mtmr1   | myotubularin related protein 1 [Source:RGD Symbol;Acc:1306569]                                                                  | 2 |
| ENSRNOG000000007881  | 1344.12   | 1368.73   | 1319.51  | 0.96  | -0.05 | 0.593196  | 0.869996092 | Mtmr14  | myotubularin related protein 14 [Source:RGD Symbol;Acc:1304842]                                                                 | 2 |
| ENSRNOG000000017826  | 994.19    | 927.81    | 1060.57  | 1.14  | 0.19  | 0.055444  | 0.19922272  | Mttr    | 5-methyltetrahydrofolate-homocysteine methyltransferase reductase [Source:RGD Symbol;Acc:1308671]                               | 2 |
| ENSRNOG000000009001  | 1366.25   | 1287.58   | 1444.93  | 1.12  | 0.17  | 0.067312  | 0.229119361 | Mtss1   | metastasis suppressor 1 [Source:RGD Symbol;Acc:1309883]                                                                         | 2 |
| ENSRNOG000000004703  | 2.58      | 1.25      | 3.90     | 1.32  | 1.64  | 0.07583   | 0.249350691 | Muc15   | mucin 15, cell surface associated [Source:RGD Symbol;Acc:1589864]                                                               | 3 |
| ENSRNOG000000013376  | 1925.09   | 2018.03   | 1832.16  | 0.91  | -0.14 | 0.113151  | 0.329454403 | Mvd     | mevalonate (diphospho) decarboxylase [Source:RGD Symbol;Acc:621292]                                                             | 2 |
| ENSRNOG000000020182  | 2428.42   | 2663.48   | 2193.35  | 0.82  | -0.28 | 0.000676  | 0.006157229 | Mvp     | major vault protein [Source:RGD Symbol;Acc:70932]                                                                               | 2 |
| ENSRNOG000000017720  | 341.53    | 348.95    | 334.10   | 0.96  | -0.06 | 0.731213  | 0.969692704 | Mxd1    | max dimerization protein 1 [Source:RGD Symbol;Acc:1564525]                                                                      | 2 |
| ENSRNOG000000016588  | 2806.51   | 2586.18   | 3026.83  | 1.17  | 0.23  | 0.004418  | 0.028595336 | Myadm   | myeloid-associated differentiation marker [Source:RGD Symbol;Acc:727835]                                                        | 2 |
| ENSRNOG000000004500  | 296.77    | 304.56    | 288.98   | 0.95  | -0.08 | 0.576472  | 0.859454388 | Myc     | myelocytomatosis oncogene [Source:RGD Symbol;Acc:3130]                                                                          | 2 |
| ENSRNOG000000042912  | 633.41    | 654.19    | 612.64   | 0.94  | -0.09 | 0.421655  | 0.741579265 | Mycbbp  | Mycbb associated protein [Source:RGD Symbol;Acc:1359123]                                                                        | 5 |
| ENSRNOG000000006308  | 139.13    | 127.99    | 150.28   | 1.17  | 0.23  | 0.220593  | 0.507919401 | Mycn    | v-myc avian myelocytomatosis viral oncogene neuroblastoma derived homolog [Source:RGD Symbol;Acc:1584995]                       | 5 |
| ENSRNOG000000013634  | 341.48    | 382.90    | 300.06   | 0.78  | -0.35 | 0.010694  | 0.057730715 | Myd88   | myeloid differentiation primary response 88 [Source:RGD Symbol;Acc:735043]                                                      | 6 |
| ENSRNOG000000004768  | 0.41      | 0.56      | 0.27     | 0.48  | -1.06 | 0.947909  | 1           | Myf5    | myogenic factor 5 [Source:RGD Symbol;Acc:1308322]                                                                               | 3 |
| ENSRNOG000000004860  | 7.76      | 8.66      | 6.87     | 0.79  | -0.33 | 0.48185   | 0.78687554  | Myh9    | myosin, heavy chain 9, non-muscle [Source:RGD Symbol;Acc:3140]                                                                  | 2 |
| ENSRNOG000000014409  | 6.43      | 9.45      | 3.41     | 0.36  | -1.47 | 0.007596  | 0.044186935 | MyI7    | myosin, light chain 7, regulatory [Source:RGD Symbol;Acc:1308262]                                                               | 3 |
| ENSRNOG000000017546  | 6.32      | 7.13      | 5.50     | 0.77  | -0.37 | 0.520884  | 0.821268719 | MyI3    | myosin light chain kinase 3 [Source:RGD Symbol;Acc:1305801]                                                                     | 3 |
| ENSRNOG000000004177  | 1745.62   | 1796.79   | 1694.45  | 0.94  | -0.08 | 0.327713  | 0.640062023 | Myo1a   | myosin IA [Source:RGD Symbol;Acc:3135]                                                                                          | 5 |
| ENSRNOG000000017346  | 893.73    | 807.53    | 979.92   | 1.21  | 0.28  | 0.006263  | 0.037999612 | Myt1    | myelin transcription factor 1 [Source:RGD Symbol;Acc:1304899]                                                                   | 5 |
| ENSRNOG000000004269  | 688.53    | 560.40    | 816.67   | 1.46  | 0.54  | 0.45E-07  | 1.34E-05    | Myt1l   | myelin transcription factor 1-like [Source:RGD Symbol;Acc:620550]                                                               | 5 |
| ENSRNOG00000001834   | 452.68    | 459.91    | 445.46   | 0.97  | -0.05 | 0.700998  | 0.949203711 | Mzt2b   | mitotic spindle organizing protein 2B [Source:RGD Symbol;Acc:1308126]                                                           | 2 |
| ENSRNOG000000001110  | 118.43    | 122.26    | 114.60   | 0.94  | -0.09 | 0.582704  | 0.864677895 | N4bp2l1 | NEDD4 binding protein 2-like 1 [Source:RGD Symbol;Acc:1595713]                                                                  | 2 |
| ENSRNOG000000045863  | 278.66    | 267.63    | 289.68   | 1.08  | 0.11  | 0.473866  | 0.780237584 | Naa16   | N1(alpha)-acetyltransferase 16, NatA auxiliary subunit [Source:RGD Symbol;Acc:1584324]                                          | 2 |
| ENSRNOG000000013911  | 1562.96   | 1580.68   | 1545.23  | 0.98  | -0.03 | 0.704358  | 0.952219133 | Nagk    | N-acetylglucosamine kinase [Source:RGD Symbol;Acc:1305057]                                                                      | 2 |
| ENSRNOG000000042256  | 11.67     | 11.46     | 11.88    | 1.04  | 0.05  | 0.906836  | 1           | Naip5   | NLR family inhibitory protein 5 [Source:RGD Symbol;Acc:1559914]                                                                 | 3 |
| ENSRNOG000000049498  | 40.53     | 42.59     | 38.46    | 0.90  | -0.15 | 0.629953  | 0.899882604 | Nat2    | N-acetyltransferase 2 (arylamine N-acetyltransferase) [Source:RGD Symbol;Acc:70492]                                             | 2 |
| ENSRNOG000000014530  | 913.56    | 857.59    | 969.53   | 1.13  | 0.18  | 0.061476  | 0.21560628  | Nav2    | neuron navigator 2 [Source:RGD Symbol;Acc:619778]                                                                               | 1 |
| ENSRNOG000000027880  | 387.01    | 411.19    | 362.83   | 0.88  | -0.18 | 0.180075  | 0.447324528 | Nbeal2  | neurobeachin-like 2 [Source:RGD Symbol;Acc:1306501]                                                                             | 2 |
| ENSRNOG000000049402  | 9181.68   | 10016.49  | 8346.88  | 0.83  | -0.26 | 0.000411  | 0.004067487 | Nbl1    | neuroblastoma 1, DAN family BMP antagonist [Source:RGD Symbol;Acc:3151]                                                         | 7 |
| ENSRNOG000000031890  | 3153.77   | 2722.78   | 3584.76  | 1.32  | 0.40  | 5.20E-07  | 1.11E-05    | Ncam1   | neural cell adhesion molecule 1 [Source:RGD Symbol;Acc:67378]                                                                   | 1 |
| ENSRNOG000000018771  | 482.23    | 552.17    | 412.29   | 0.75  | -0.42 | 0.000971  | 0.008295758 | Ncapd2  | non-SMC condensin I complex, subunit D2 [Source:RGD Symbol;Acc:1562596]                                                         | 2 |
| ENSRNOG000000008932  | 421.07    | 427.04    | 415.10   | 0.97  | -0.04 | 0.744473  | 0.978206105 | Ncapd3  | non-SMC condensin II complex, subunit D3 [Source:RGD Symbol;Acc:1562176]                                                        | 2 |
| ENSRNOG000000038572  | 67.25     | 64.35     | 70.15    | 1.09  | 0.12  | 0.710985  | 0.956197086 | Ncapg   | non-SMC condensin I complex, subunit G [Source:RGD Symbol;Acc:1562646]                                                          | 2 |
| ENSRNOG00000004968   | 109.78    | 112.87    | 106.69   | 0.95  | -0.08 | 0.647292  | 0.913613982 | Ncapg2  | non-SMC condensin II complex, subunit G2 [Source:RGD Symbol;Acc:1308406]                                                        | 2 |
| ENSRNOG000000        |           |           |          |       |       |           |             |         |                                                                                                                                 |   |

|                     |          |          |          |      |        |          |             |           |                                                                                                                     |   |
|---------------------|----------|----------|----------|------|--------|----------|-------------|-----------|---------------------------------------------------------------------------------------------------------------------|---|
| ENSRNOG00000011668  | 115.18   | 111.69   | 118.68   | 1.06 | 0.09   | 0.74051  | 0.975681279 | Nf13      | nuclear factor, interleukin 3 regulated [Source:RGD Symbol;Acc:620972]                                              | 2 |
| ENSRNOG00000023258  | 1820.73  | 1876.61  | 1764.85  | 0.94 | -0.09  | 0.328334 | 0.640548423 | Nfkb1     | nuclear factor of kappa light polypeptide gene enhancer in B-cells 1 [Source:RGD Symbol;Acc:70498]                  | 1 |
| ENSRNOG00000007390  | 777.81   | 831.12   | 724.49   | 0.87 | -0.20  | 0.079378 | 0.257276083 | Nfkbia    | nuclear factor of kappa light polypeptide gene enhancer in B-cells inhibitor, alpha [Source:RGD Symbol;Acc:3171]    | 1 |
| ENSRNOG00000000839  | 802.76   | 874.89   | 730.63   | 0.84 | -0.26  | 0.015321 | 0.076562385 | Nfkbil1   | nuclear factor of kappa light polypeptide gene enhancer in B-cells inhibitor-like 1 [Source:RGD Symbol;Acc:1303310] | 1 |
| ENSRNOG00000003163  | 102.47   | 109.49   | 95.45    | 0.87 | -0.20  | 0.331632 | 0.644680577 | Nfkbiz    | nuclear factor of kappa light polypeptide gene enhancer in B-cells inhibitor, zeta [Source:RGD Symbol;Acc:1310834]  | 1 |
| ENSRNOG000000011719 | 244.42   | 247.02   | 241.81   | 0.98 | -0.03  | 0.868912 |             | Ngb       | neuroglobin [Source:RGD Symbol;Acc:621461]                                                                          | 3 |
| ENSRNOG00000016571  | 16.38    | 20.87    | 11.88    | 0.57 | -0.81  | 0.023661 | 0.107104585 | Ngf       | nerve growth factor (beta polypeptide) [Source:RGD Symbol;Acc:1598328]                                              | 1 |
| ENSRNOG00000005392  | 27656.59 | 24684.75 | 30628.43 | 1.24 | 0.31   | 9.74E-05 | 0.001176324 | Ngfr      | nerve growth factor receptor [Source:RGD Symbol;Acc:3177]                                                           | 1 |
| ENSRNOG000000028822 | 3383.92  | 3382.51  | 3385.34  | 1.00 | 0.00   | 0.99998  |             | 1Ngfrap1  | nerve growth factor receptor (TNFRSF16) associated protein 1 [Source:RGD Symbol;Acc:3148]                           | 5 |
| ENSRNOG00000005196  | 4.91     | 5.15     | 4.67     | 0.91 | -0.14  | 0.95252  |             | 1Nhlh1    | nescient helix loop helix 1 [Source:RGD Symbol;Acc:1310261]                                                         | 3 |
| ENSRNOG00000005190  | 742.77   | 718.04   | 767.50   | 1.07 | 0.10   | 0.40623  | 0.725738332 | Nipal2    | NIPA-like domain containing 2 [Source:RGD Symbol;Acc:1564315]                                                       | 2 |
| ENSRNOG000000010332 | 1222.63  | 1163.82  | 1281.44  | 1.10 | 0.14   | 0.161247 | 0.416019914 | Nipsnap3b | nipsnap homolog 3B (C. elegans) [Source:RGD Symbol;Acc:1359688]                                                     | 2 |
| ENSRNOG000000011445 | 138.55   | 129.49   | 147.61   | 1.14 | 0.19   | 0.311854 | 0.622091472 | Nkain1    | Na+/K+ transporting ATPase interacting 1 [Source:RGD Symbol;Acc:1561205]                                            | 5 |
| ENSRNOG000000018095 | 1062.84  | 1082.63  | 1043.05  | 0.96 | -0.05  | 0.6189   | 0.890285773 | Nkiras2   | NFKB inhibitor interacting Ras-like 2 [Source:RGD Symbol;Acc:1307363]                                               | 2 |
| ENSRNOG000000049128 | 1156.68  | 1097.11  | 1216.25  | 1.11 | 0.15   | 0.102269 | 0.307259664 | Nktr      | natural killer cell triggering receptor [Source:RGD Symbol;Acc:2321593]                                             | 2 |
| ENSRNOG000000008644 | 0.13     | 0.00     | 0.26     | Inf  | Inf    | 1        |             | 1Nkx2-1   | NK2 homeobox 1 [Source:RGD Symbol;Acc:3866]                                                                         | 3 |
| ENSRNOG000000015430 | 1901.04  | 1933.19  | 1868.89  | 0.97 | -0.05  | 0.666412 | 0.927303064 | Nlgn2     | neuroligin 2 [Source:RGD Symbol;Acc:621118]                                                                         | 1 |
| ENSRNOG00000003170  | 64.11    | 79.77    | 48.45    | 0.61 | -0.72  | 0.002324 | 0.017043601 | Nlrp3     | NLR family, pyrin domain containing 3 [Source:RGD Symbol;Acc:1308314]                                               | 1 |
| ENSRNOG000000027502 | 301.50   | 291.86   | 311.14   | 1.07 | 0.09   | 0.591588 | 0.868945956 | Nmi       | N-myc (and STAT) interactor [Source:RGD Symbol;Acc:1311721]                                                         | 2 |
| ENSRNOG00000002164  | 46.30    | 43.42    | 49.18    | 1.13 | 0.18   | 0.464127 | 0.779864142 | Nmu       | neuromedin U [Source:RGD Symbol;Acc:68388]                                                                          | 4 |
| ENSRNOG000000018521 | 77.01    | 75.61    | 78.41    | 1.04 | 0.05   | 0.807453 |             | 1Nmur1    | neuromedin U receptor 1 [Source:RGD Symbol;Acc:619867]                                                              | 5 |
| ENSRNOG000000024923 | 1498.16  | 1405.94  | 1590.38  | 1.13 | 0.18   | 0.042209 | 0.163923858 | Nnat      | neuronatin [Source:RGD Symbol;Acc:620155]                                                                           | 5 |
| ENSRNOG000000023683 | 135.45   | 145.66   | 125.23   | 0.86 | -0.22  | 0.235444 | 0.528229828 | Nog       | noggin [Source:RGD Symbol;Acc:3183]                                                                                 | 5 |
| ENSRNOG000000015588 | 2532.84  | 2540.79  | 2524.89  | 0.99 | -0.01  | 0.886527 |             | 1Nol3     | nucleolar protein 3 (apoptosis repressor with CARD domain) [Source:RGD Symbol;Acc:708558]                           | 2 |
| ENSRNOG000000014775 | 14.17    | 12.79    | 15.56    | 1.22 | 0.28   | 0.47572  | 0.781293258 | Nol4      | nucleolar protein 4 [Source:RGD Symbol;Acc:1310663]                                                                 | 2 |
| ENSRNOG000000001130 | 97.94    | 113.39   | 82.49    | 0.73 | -0.46  | 0.039393 | 0.155515585 | Nos1      | nitric oxide synthase 1, neuronal [Source:RGD Symbol;Acc:3184]                                                      | 1 |
| ENSRNOG000000048887 | 0.84     | 1.02     | 0.67     | 0.66 | -0.60  | 0.926137 |             | 1NOS2     | Uncharacterized protein [Source:UniProtKB/TrEMBL;Acc:M0R817]                                                        | 1 |
| ENSRNOG00000009348  | 208.32   | 297.74   | 118.90   | 0.40 | -1.32  | 8.81E-15 | 5.10E-13    | Nos3      | nitric oxide synthase 3, endothelial cell [Source:RGD Symbol;Acc:3186]                                              | 1 |
| ENSRNOG000000000442 | 562.39   | 699.42   | 425.36   | 0.61 | -0.72  | 2.04E-09 | 6.72E-08    | Notch4    | notch 4 [Source:RGD Symbol;Acc:1303282]                                                                             | 1 |
| ENSRNOG000000031440 | 87.17    | 72.53    | 101.81   | 1.40 | 0.49   | 0.02124  | 0.098415922 | Nov1      | neuro-oncological ventral antigen 1 [Source:RGD Symbol;Acc:621345]                                                  | 1 |
| ENSRNOG000000048706 | 5.05     | 4.04     | 6.06     | 1.50 | 0.59   | 0.413217 | 0.732555763 | Nox1      | NADPH oxidase 1 [Source:RGD Symbol;Acc:620598]                                                                      | 1 |
| ENSRNOG000000013925 | 2.85     | 5.69     | 0.00     | 0.00 | #NAME? | 4.29E-06 | 7.33E-05    | Nox4      | NADPH oxidase 4 [Source:RGD Symbol;Acc:620600]                                                                      | 1 |
| ENSRNOG000000013408 | 46.59    | 52.48    | 40.70    | 0.78 | -0.37  | 0.14317  | 0.385565542 | Npas2     | neuronal PAS domain protein 2 [Source:RGD Symbol;Acc:1309681]                                                       | 2 |
| ENSRNOG000000020009 | 4.11     | 5.10     | 3.11     | 0.61 | -0.71  | 0.302204 | 0.610131723 | Npas4     | neuronal PAS domain protein 4 [Source:RGD Symbol;Acc:628866]                                                        | 3 |
| ENSRNOG000000036685 | 59.63    | 61.32    | 57.95    | 0.95 | -0.08  | 0.758332 | 0.98606141  | Npb       | neuropeptide B [Source:RGD Symbol;Acc:708513]                                                                       | 1 |
| ENSRNOG000000023095 | 6431.43  | 6103.55  | 6759.31  | 1.11 | 0.15   | 0.059951 | 0.211352904 | Npepps    | aminopeptidase puromycin sensitive [Source:RGD Symbol;Acc:6119962]                                                  | 1 |
| ENSRNOG000000003067 | 9.00     | 7.30     | 10.70    | 1.47 | 0.55   | 0.240419 | 0.533008095 | Npffr2    | neuropeptide FF receptor 2 [Source:RGD Symbol;Acc:620168]                                                           | 3 |
| ENSRNOG000000008141 | 10.63    | 8.90     | 12.37    | 1.39 | 0.47   | 0.348334 | 0.664570268 | Nppb      | natriuretic peptide B [Source:RGD Symbol;Acc:3194]                                                                  | 5 |
| ENSRNOG000000018854 | 9.99     | 11.24    | 8.75     | 0.78 | -0.36  | 0.512524 | 0.813092492 | Nppc      | natriuretic peptide C [Source:RGD Symbol;Acc:620850]                                                                | 1 |
| ENSRNOG000000003741 | 1839.11  | 1552.11  | 2126.11  | 1.37 | 0.45   | 6.31E-08 | 1.56E-06    | Nptx1     | neuronal pentraxin I [Source:RGD Symbol;Acc:628894]                                                                 | 1 |
| ENSRNOG00000001006  | 3842.51  | 3514.83  | 4170.18  | 1.19 | 0.25   | 0.002814 | 0.019892726 | Nptx2     | neuronal pentraxin II [Source:RGD Symbol;Acc:1309447]                                                               | 5 |
| ENSRNOG000000016156 | 3926.92  | 3676.93  | 4176.92  | 1.14 | 0.18   | 0.02108  | 0.097926286 | Nptr      | neuronal pentraxin receptor [Source:RGD Symbol;Acc:628898]                                                          | 5 |
| ENSRNOG000000012390 | 55.62    | 68.53    | 42.72    | 0.62 | -0.68  | 0.007821 | 0.045277763 | Npw       | neuropeptide W [Source:RGD Symbol;Acc:727858]                                                                       | 3 |
| ENSRNOG000000014149 | 1139.29  | 953.22   | 1325.37  | 1.39 | 0.48   | 9.19E-07 | 1.84E-05    | Npy1r     | neuropeptide Y receptor Y1 [Source:RGD Symbol;Acc:3198]                                                             | 4 |
| ENSRNOG000000049213 | 123.26   | 99.56    | 146.96   | 1.48 | 0.56   | 0.003735 | 0.024960317 | Npy2r     | neuropeptide Y receptor Y2 [Source:RGD Symbol;Acc:620475]                                                           | 7 |
| ENSRNOG000000014172 | 128.83   | 102.71   | 154.96   | 1.51 | 0.59   | 0.002443 | 0.017766869 | Npy5r     | neuropeptide Y receptor Y5 [Source:RGD Symbol;Acc:3199]                                                             | 1 |
| ENSRNOG000000012772 | 1334.54  | 1371.13  | 1297.96  | 0.95 | -0.08  | 0.391918 | 0.709393648 | Nqo1      | NAD(P)H dehydrogenase, quinone 1 [Source:RGD Symbol;Acc:2503]                                                       | 1 |
| ENSRNOG000000016892 | 1859.51  | 2004.14  | 1714.88  | 0.86 | -0.22  | 0.010602 | 0.057383707 | Nr2f6     | nuclear receptor subfamily 2, group F, member 6 [Source:RGD Symbol;Acc:621685]                                      | 1 |
| ENSRNOG000000014096 | 1676.28  | 1639.27  | 1713.29  | 1.05 | 0.06   | 0.49576  | 0.800327772 | Nr3c1     | nuclear receptor subfamily 3, group C, member 1 [Source:RGD Symbol;Acc:2741]                                        | 1 |
| ENSRNOG000000007607 | 1680.70  | 1751.63  | 1609.77  | 0.92 | -0.12  | 0.204752 | 0.485046012 | Nr4a1     | nuclear receptor subfamily 4, group A, member 1 [Source:RGD Symbol;Acc:620029]                                      | 1 |
| ENSRNOG000000013232 | 45.81    | 38.73    | 52.88    | 1.37 | 0.45   | 0.084303 | 0.268598408 | Nr6a1     | nuclear receptor subfamily 6, group A, member 1 [Source:RGD Symbol;Acc:1564740]                                     | 2 |
| ENSRNOG000000010392 | 1681.19  | 1494.73  | 1867.65  | 1.25 | 0.32   | 0.00016  | 0.001817815 | Nrg1      | neuregulin 1 [Source:RGD Symbol;Acc:621341]                                                                         | 1 |
| ENSRNOG000000019093 | 338.96   | 327.42   | 350.50   | 1.07 | 0.10   | 0.481174 | 0.786199425 | Nrg2      | neuregulin 2 [Source:RGD Symbol;Acc:1303302]                                                                        | 2 |
| ENSRNOG000000008018 | 250.09   | 267.08   | 233.09   | 0.87 | -0.20  | 0.208991 | 0.490937955 | Nrm       | nurim (nuclear envelope membrane protein) [Source:RGD Symbol;Acc:1302966]                                           | 1 |
| ENSRNOG000000050767 | 9082.54  | 8337.88  | 9827.21  | 1.18 | 0.24   | 0.002045 | 0.01537386  | Nrn1      | neuritin 1 [Source:RGD Symbol;Acc:621586]                                                                           | 2 |
| ENSRNOG000000017444 | 2273.91  | 2026.57  | 2521.24  | 1.24 | 0.32   | 0.000167 | 0.001897916 | Nrsn1     | neurensin 1 [Source:RGD Symbol;Acc:1307833]                                                                         | 5 |
| ENSRNOG000000020644 | 13058.27 | 12716.73 | 13399.82 | 1.05 | 0.08   | 0.326303 | 0.638677445 | Nsg2      | neuron specific gene family member 2 [Source:RGD Symbol;Acc:1563944]                                                | 5 |
| ENSRNOG000000003650 | 61.15    | 75.24    | 47.05    | 0.63 | -0.68  | 0.004187 | 0.027394246 | Nt5c      | 5', 3'-nucleotidase, cytosolic [Source:RGD Symbol;Acc:2321875]                                                      | 2 |
| ENSRNOG000000011071 | 200.24   | 209.10   | 191.38   | 0.92 | -0.13  | 0.4693   | 0.780237584 | Nt5e      | 5' nucleotidase, ecto [Source:RGD Symbol;Acc:61956]                                                                 | 7 |
| ENSRNOG000000019716 | 6.91     | 9.06     | 4.76     | 0.53 | -0.93  | 0.092422 | 0.287154945 | Ntf3      | neurotrophin 3 [Source:RGD Symbol;Acc:619728]                                                                       | 1 |
| ENSRNOG000000020783 | 3.06     | 4.04     | 2.08     | 0.51 | -0.96  | 0.241572 | 0.534111218 | Ntf4      | neurotrophin 4 [Source:RGD Symbol;Acc:3212]                                                                         | 1 |
| ENSRNOG000000013953 | 9431.41  | 8927.37  | 9935.46  | 1.11 | 0.15   | 0.037709 | 0.150993732 | Ntrk1     | neurotrophic tyrosine kinase, receptor, type 1 [Source:RGD Symbol;Acc:620144]                                       | 1 |
| ENSRNOG000000018839 | 1636.61  | 1385.54  | 1887.68  | 1.36 | 0.45   | 1.97E-07 | 4.52E-06    | Ntrk2     | neurotrophic tyrosine kinase, receptor, type 2 [Source:RGD Symbol;Acc:3213]                                         | 1 |
| ENSRNOG000000018674 | 242.20   | 224.54   | 259.86   | 1.16 | 0.21   | 0.157369 | 0.410547326 | Ntrk3     | neurotrophic tyrosine kinase, receptor, type 3 [Source:RGD Symbol;Acc:3214]                                         | 1 |
| ENSRNOG000000004179 | 23.04    | 20.37    | 25.71    | 1.26 | 0.34   | 0.278721 | 0.584290278 | Nts       | neurotensin [Source:RGD Symbol;Acc:621612]                                                                          | 7 |
| ENSRNOG000000028708 | 121.04   | 116.49   | 125.59   | 1.08 | 0.11   | 0.654708 | 0.918960335 | Ntsr1     | neurotensin receptor 1 [Source:RGD Symbol;Acc:1306076]                                                              | 4 |
| ENSRNOG000000049054 | 277.54   | 223.35   | 331.74   | 1.49 | 0.57   | 0.000134 | 0.001548029 | Ntsr2     | neurotensin receptor 2 [Source:RGD Symbol;Acc:70962]                                                                | 1 |
| ENSRNOG000000017955 | 354.20   | 358.97   | 349.42   | 0.97 | -0.04  | 0.794265 |             | 1Nudt8    | nudix (nucleoside diphosphate linked moiety X)-type motif 8 [Source:RGD Symbol;Acc:1309040]                         | 2 |
| ENSRNOG000000002711 | 65.20    | 78.58    | 51.82    | 0.66 | -0.60  | 0.009623 | 0.053531001 | Nuf2      | NUF2, NDC80 kinetochore complex component [Source:RGD Symbol;Acc:1307952]                                           | 2 |
| ENSRNOG000000005390 | 253.46   | 253.09   | 253.82   | 1.00 | 0.00   | 0.995666 |             | 1Nup210   | nucleoporin 210 [Source:RGD Symbol;Acc:69339]                                                                       | 2 |
| ENSRNOG000000018564 | 1535.33  | 1497.36  | 1573.29  | 1.05 | 0.07   | 0.444788 | 0.763437784 | Nup93     | nucleoporin 93 [Source:RGD Symbol;Acc:1311525]                                                                      | 2 |
| ENSRNOG000000004921 | 56.35    | 72.58    | 40.13    | 0.55 | -0.85  | 0.000665 | 0.006083852 | Nusap1    | nucleolar and spindle associated protein 1 [Source:RGD Symbol;Acc:1305764]                                          | 2 |
| ENSRNOG000000003629 | 377.47   | 397.73   | 357.21   | 0.90 | -0.15  | 0.24889  | 0.5450736   | Nvl       | nuclear VCP-like [Source:RGD Symbol;Acc:1311270]                                                                    | 2 |
| ENSRNOG000000019069 | 2894.07  | 3044.47  | 2743.67  | 0.90 | -0.15  | 0.055283 | 0.19945387  | Nxf1      | nuclear RNA export factor 1 [Source:RGD Symbol;Acc:62014]                                                           | 2 |
| ENSRNOG000000008178 | 1451.73  | 1469.02  | 1434.44  | 0.98 | -0.03  | 0.694839 | 0.944529312 | Nxn       | nucleoredoxin [Source:RGD Symbol;Acc:1310489]                                                                       | 3 |
| ENSRNOG000000027847 | 14.73    | 10.15    | 19.30    | 1.90 | 0.93   | 0.020507 | 0.095849466 | Nxpe2     | neurexophilin and PC-esterase domain family, member 2 [Source:RGD Symbol;Acc:2323193]                               | 2 |
| ENSRNOG000000031343 | 3.27     | 6.54     | 0.00     | 0.00 | #NAME? | 9.24E-07 | 1.85E-05    | Nxpe4     | neurexophilin and PC-esterase domain family, member 4 [Source:RGD Symbol;Acc:1588255]                               | 2 |
| ENSRNOG000000027061 | 15.41    | 22.30    | 8.52     | 0.38 | -1.39  | 0.000454 | 0.004423268 | Nxpe5     | neurexophilin and PC-esterase domain                                                                                |   |

|                      |          |         |          |      |        |          |             |          |                                                                                                        |   |
|----------------------|----------|---------|----------|------|--------|----------|-------------|----------|--------------------------------------------------------------------------------------------------------|---|
| ENSRNOG00000002903   | 1328.93  | 1284.62 | 1373.24  | 1.07 | 0.10   | 0.305358 | 0.614457878 | Oraov1   | oral cancer overexpressed 1 [Source:RGD Symbol;Acc:1304637]                                            | 2 |
| ENSRNOG000000042961  | 25.86    | 26.32   | 25.41    | 0.97 | -0.05  | 1        | 1           | Ormdl1   | ORMDL sphingolipid biosynthesis regulator 1 [Source:RGD Symbol;Acc:2300146]                            | 3 |
| ENSRNOG000000010011  | 890.27   | 704.12  | 1076.41  | 1.53 | 0.61   | 1.60E-09 | 5.39E-08    | Osbpl3   | oxysterol binding protein-like 3 [Source:RGD Symbol;Acc:1564287]                                       | 2 |
| ENSRNOG000000010812  | 688.74   | 605.27  | 772.20   | 1.28 | 0.35   | 0.001043 | 0.008831982 | Osbpl6   | oxysterol binding protein-like 6 [Source:RGD Symbol;Acc:1308887]                                       | 2 |
| ENSRNOG000000026962  | 209.74   | 164.62  | 254.86   | 1.55 | 0.63   | 0.000159 | 0.001807404 | Osbpl8   | oxysterol binding protein-like 8 [Source:RGD Symbol;Acc:1561474]                                       | 2 |
| ENSRNOG000000008297  | 974.27   | 969.87  | 978.67   | 1.01 | 0.01   | 0.931607 | 1           | Oser1    | oxidative stress responsive serine-rich 1 [Source:RGD Symbol;Acc:1303142]                              | 1 |
| ENSRNOG000000024390  | 7.33     | 8.42    | 6.24     | 0.74 | -0.43  | 0.144911 | 0.734725258 | Osm      | oncostatin M [Source:RGD Symbol;Acc:1585012]                                                           | 2 |
| ENSRNOG000000033192  | 99.64    | 102.78  | 96.50    | 0.94 | -0.09  | 0.611971 | 0.885939579 | Osmr     | oncostatin M receptor [Source:RGD Symbol;Acc:1302983]                                                  | 5 |
| ENSRNOG000000008605  | 2337.64  | 2274.18 | 2401.09  | 1.06 | 0.08   | 0.337608 | 0.651597796 | Ost4     | oligosaccharyltransferase 4 homolog (S. cerevisiae) [Source:RGD Symbol;Acc:2300150]                    | 2 |
| ENSRNOG000000017487  | 9.04     | 9.46    | 8.63     | 0.91 | -0.13  | 0.886908 | 1           | Otoa     | otancorin [Source:RGD Symbol;Acc:1562741]                                                              | 5 |
| ENSRNOG000000009967  | 175.05   | 183.44  | 166.66   | 0.91 | -0.14  | 0.429316 | 0.748038086 | Otof     | otoferlin [Source:RGD Symbol;Acc:620646]                                                               | 3 |
| ENSRNOG000000031452  | 4.57     | 3.86    | 5.28     | 1.37 | 0.45   | 0.534291 | 0.83315454  | Otop3    | otopetrin 3 [Source:RGD Symbol;Acc:1306663]                                                            | 3 |
| ENSRNOG000000019794  | 0.51     | 0.27    | 0.75     | 2.80 | 1.48   | 0.692962 | 0.943449877 | Ovch2    | ovochymase 2 [Source:RGD Symbol;Acc:1564636]                                                           | 2 |
| ENSRNOG000000006850  | 0.36     | 0.72    | 0.00     | 0.00 | #NAME? | 0.238385 | 0.530704828 | Ovol2    | ovo-like zinc finger 2 [Source:RGD Symbol;Acc:1306130]                                                 | 5 |
| ENSRNOG000000021225  | 0.12     | 0.24    | 0.00     | 0.00 | #NAME? | 0.964517 | 1           | Oxt      | oxytocin/neurophysin 1 prepropeptide [Source:RGD Symbol;Acc:3238]                                      | 1 |
| ENSRNOG000000005806  | 5.41     | 5.40    | 5.42     | 1.00 | 0.01   | 1        | 1           | Oxtr     | oxytocin receptor [Source:RGD Symbol;Acc:3239]                                                         | 1 |
| ENSRNOG000000037456  | 250.20   | 240.44  | 259.96   | 1.08 | 0.11   | 0.467909 | 0.780237584 | P2rx2    | purinergic receptor P2X, ligand-gated ion channel, 2 [Source:RGD Symbol;Acc:620251]                    | 7 |
| ENSRNOG000000008552  | 10498.31 | 9264.05 | 11732.56 | 1.27 | 0.34   | 4.79E-06 | 8.10E-05    | P2rx3    | purinergic receptor P2X, ligand-gated ion channel, 3 [Source:RGD Symbol;Acc:620253]                    | 7 |
| ENSRNOG000000001300  | 1061.06  | 1119.70 | 1002.43  | 0.90 | -0.16  | 0.106252 | 0.315629906 | P2rx4    | purinergic receptor P2X, ligand-gated ion channel 4 [Source:RGD Symbol;Acc:62073]                      | 1 |
| ENSRNOG000000019208  | 887.15   | 878.43  | 895.86   | 1.02 | 0.03   | 0.766447 | 0.991583883 | P2rx5    | purinergic receptor P2X, ligand-gated ion channel, 5 [Source:RGD Symbol;Acc:620256]                    | 1 |
| ENSRNOG000000001296  | 413.25   | 430.98  | 395.53   | 0.92 | -0.12  | 0.356488 | 0.672307646 | P2rx7    | purinergic receptor P2X, ligand-gated ion channel, 7 [Source:RGD Symbol;Acc:621241]                    | 1 |
| ENSRNOG000000014232  | 1398.67  | 1221.25 | 1576.10  | 1.29 | 0.37   | 7.22E-05 | 0.00091131  | P2ry1    | purinergic receptor P2Y, G-protein coupled, 1 [Source:RGD Symbol;Acc:3242]                             | 6 |
| ENSRNOG000000013902  | 91.18    | 79.67   | 102.70   | 1.29 | 0.37   | 0.077712 | 0.253831629 | P2ry12   | purinergic receptor P2Y, G-protein coupled, 12 [Source:RGD Symbol;Acc:621681]                          | 1 |
| ENSRNOG000000029756  | 17.31    | 17.45   | 17.16    | 0.98 | -0.02  | 0.860711 | 1           | P2ry13   | purinergic receptor P2Y, G-protein coupled, 13 [Source:RGD Symbol;Acc:1302941]                         | 1 |
| ENSRNOG000000019283  | 966.57   | 1013.07 | 920.07   | 0.91 | -0.14  | 0.212163 | 0.496006382 | P2ry2    | purinergic receptor P2Y, G-protein coupled, 2 [Source:RGD Symbol;Acc:62088]                            | 1 |
| ENSRNOG000000002953  | 7.86     | 6.81    | 8.90     | 1.31 | 0.38   | 0.45752  | 0.773461361 | P2ry4    | pyrimidinergic receptor P2Y, G-protein coupled, 4 [Source:RGD Symbol;Acc:61798]                        | 1 |
| ENSRNOG000000019270  | 63.29    | 70.14   | 56.43    | 0.80 | -0.31  | 0.141672 | 0.382167408 | P2ry6    | pyrimidinergic receptor P2Y, G-protein coupled, 6 [Source:RGD Symbol;Acc:620269]                       | 1 |
| ENSRNOG000000008639  | 4968.12  | 5065.08 | 4871.15  | 0.96 | -0.06  | 0.450461 | 0.766707245 | Pabpc1   | poly(A) binding protein, cytoplasmic 1 [Source:RGD Symbol;Acc:619838]                                  | 2 |
| ENSRNOG000000015642  | 462.58   | 469.09  | 456.08   | 0.97 | -0.04  | 0.705185 | 0.952908987 | Pabpc4   | poly(A) binding protein, cytoplasmic 4 [Source:RGD Symbol;Acc:1305015]                                 | 2 |
| ENSRNOG000000003354  | 3.59     | 2.65    | 4.52     | 1.71 | 0.77   | 0.279273 | 0.585031908 | Pabpc5   | poly A binding protein, cytoplasmic 5 [Source:RGD Symbol;Acc:1587661]                                  | 3 |
| ENSRNOG0000000042195 | 3726.21  | 4315.94 | 3136.47  | 0.73 | -0.46  | 3.85E-09 | 1.21E-07    | Pabpn1   | poly(A) binding protein, nuclear 1 [Source:RGD Symbol;Acc:619928]                                      | 2 |
| ENSRNOG000000025083  | 2498.03  | 2461.60 | 2534.47  | 1.03 | 0.04   | 0.536749 | 0.83315454  | Pacsin1  | protein kinase C and casein kinase substrate in neurons 1 [Source:RGD Symbol;Acc:3247]                 | 1 |
| ENSRNOG000000020481  | 1160.39  | 1183.48 | 1137.30  | 0.96 | -0.06  | 0.543057 | 0.83315454  | Pafah1b3 | platelet-activating factor acetylhydrolase 1b, catalytic subunit 3 [Source:RGD Symbol;Acc:620333]      | 5 |
| ENSRNOG0000000047009 | 35.70    | 31.61   | 39.78    | 1.26 | 0.33   | 0.213692 | 0.497840296 | Pag1     | phosphoprotein membrane anchor with glycosphingolipid microdomains 1 [Source:RGD Symbol;Acc:620]       | 2 |
| ENSRNOG000000019883  | 560.68   | 656.54  | 464.82   | 0.71 | -0.50  | 2.75E-05 | 0.000387598 | Pak4     | p21 protein (Cdc42/Rac)-activated kinase 4 [Source:RGD Symbol;Acc:1307705]                             | 1 |
| ENSRNOG000000005509  | 90.04    | 74.56   | 105.52   | 1.42 | 0.50   | 0.02414  | 0.108851914 | Pak7     | p21 protein (Cdc42/Rac)-activated kinase 7 [Source:RGD Symbol;Acc:1312009]                             | 1 |
| ENSRNOG000000025558  | 39.23    | 23.34   | 55.11    | 2.36 | 1.24   | 1.38E-05 | 0.000209    | Paln2    | paralemmin 2 [Source:RGD Symbol;Acc:6497336]                                                           | 5 |
| ENSRNOG000000014164  | 709.09   | 676.42  | 741.76   | 1.10 | 0.13   | 0.284746 | 0.590212038 | Papq5    | progesterin and adiponectin receptor family member V [Source:RGD Symbol;Acc:1311259]                   | 5 |
| ENSRNOG000000020002  | 104.62   | 106.03  | 103.22   | 0.97 | -0.04  | 0.857863 | 1           | Parp11   | poly (ADP-ribose) polymerase family, member 11 [Source:RGD Symbol;Acc:1561791]                         | 2 |
| ENSRNOG000000008196  | 179.59   | 191.80  | 167.37   | 0.87 | -0.20  | 0.251256 | 0.548199239 | Parp12   | poly (ADP-ribose) polymerase family, member 12 [Source:RGD Symbol;Acc:1308628]                         | 2 |
| ENSRNOG000000010824  | 984.47   | 954.72  | 1014.22  | 1.06 | 0.09   | 0.391807 | 0.70925446  | Parp8    | poly (ADP-ribose) polymerase family, member 8 [Source:RGD Symbol;Acc:1587384]                          | 2 |
| ENSRNOG000000016888  | 150.59   | 159.11  | 142.08   | 0.89 | -0.16  | 0.374872 | 0.691277158 | Pask     | PAS domain containing serine/threonine kinase [Source:RGD Symbol;Acc:1306146]                          | 2 |
| ENSRNOG000000017061  | 2.28     | 1.49    | 3.08     | 2.06 | 1.04   | 0.288602 | 0.595321477 | Pat12    | protein associated with topoisomerase II homolog 2 (yeast) [Source:RGD Symbol;Acc:1308787]             | 3 |
| ENSRNOG000000005917  | 64.98    | 96.87   | 33.10    | 0.34 | -1.55  | 3.00E-10 | 1.10E-08    | Pawr     | PRKC, apoptosis, WT1, regulator [Source:RGD Symbol;Acc:69065]                                          | 1 |
| ENSRNOG000000014253  | 1.67     | 1.83    | 1.50     | 0.82 | -0.29  | 0.905843 | 1           | Pax2     | paired box 2 [Source:RGD Symbol;Acc:1305568]                                                           | 5 |
| ENSRNOG000000026203  | 5.02     | 5.69    | 4.36     | 0.77 | -0.38  | 0.570787 | 0.854737846 | Pax8     | paired box 8 [Source:RGD Symbol;Acc:620434]                                                            | 5 |
| ENSRNOG000000015308  | 21.24    | 25.62   | 16.86    | 0.66 | -0.60  | 0.085904 | 0.272630406 | Pbk      | PDZ binding kinase [Source:RGD Symbol;Acc:1309565]                                                     | 2 |
| ENSRNOG000000000440  | 1942.56  | 2066.62 | 1818.50  | 0.88 | -0.18  | 0.032825 | 0.136051211 | Pbx2     | pre-B-cell leukemia homeobox 2 [Source:RGD Symbol;Acc:1303084]                                         | 1 |
| ENSRNOG000000000566  | 982.51   | 913.87  | 1051.15  | 1.15 | 0.20   | 0.038335 | 0.17027273  | Pcbd1    | pterin-4 alpha-carbinolamine dehydratase/dimerization cofactor of hepatocyte nuclear factor 1 alpha [S | 2 |
| ENSRNOG000000019265  | 67.93    | 76.16   | 59.71    | 0.78 | -0.35  | 0.127493 | 0.354543154 | Pcdh12   | protodcadherin 12 [Source:RGD Symbol;Acc:619917]                                                       | 2 |
| ENSRNOG000000008360  | 1164.06  | 1186.31 | 1141.81  | 0.96 | -0.06  | 0.532465 | 0.831607813 | Pcgf1    | polycomb group ring finger 1 [Source:RGD Symbol;Acc:1549782]                                           | 2 |
| ENSRNOG000000020250  | 213.26   | 202.14  | 224.38   | 1.11 | 0.15   | 0.363481 | 0.679879624 | Pcgf6    | polycomb group ring finger 6 [Source:RGD Symbol;Acc:1306904]                                           | 2 |
| ENSRNOG000000017404  | 1410.50  | 1309.52 | 1511.49  | 1.15 | 0.21   | 0.029571 | 0.126069162 | Pcmt2    | protein-L-isospartate (D-aspartate) O-methyltransferase domain containing 2 [Source:RGD Symbol;Acc:    | 2 |
| ENSRNOG000000021264  | 1568.99  | 1558.80 | 1579.19  | 1.01 | 0.02   | 0.916376 | 1           | Pcna     | proliferating cell nuclear antigen [Source:RGD Symbol;Acc:3269]                                        | 2 |
| ENSRNOG0000000046021 | 1.09     | 0.72    | 1.46     | 2.02 | 1.02   | 0.613284 | 0.886207017 | Pcsk1n   | proprotein convertase subtilisin/kexin type 1 inhibitor [Source:RGD Symbol;Acc:3617]                   | 3 |
| ENSRNOG000000005438  | 2928.12  | 2742.80 | 3113.45  | 1.14 | 0.18   | 0.019378 | 0.091769728 | Pcsk2    | proprotein convertase subtilisin/kexin type 2 [Source:RGD Symbol;Acc:3273]                             | 1 |
| ENSRNOG000000015262  | 1516.07  | 1559.55 | 1472.59  | 0.94 | -0.08  | 0.360137 | 0.675723375 | Pcsk6    | proprotein convertase subtilisin/kexin type 6 [Source:RGD Symbol;Acc:3246]                             | 1 |
| ENSRNOG000000006280  | 103.21   | 105.84  | 100.58   | 0.95 | -0.07  | 0.706434 | 0.953615055 | Pcsk9    | proprotein convertase subtilisin/kexin type 9 [Source:RGD Symbol;Acc:728909]                           | 2 |
| ENSRNOG0000000001490 | 892.84   | 895.76  | 889.92   | 0.99 | -0.01  | 0.905415 | 1           | Pdcd2    | programmed cell death 2 [Source:RGD Symbol;Acc:61887]                                                  | 2 |
| ENSRNOG000000013286  | 1461.76  | 1437.61 | 1485.90  | 1.03 | 0.05   | 0.606007 | 0.881015211 | Pdcl3    | phosducin-like 3 [Source:RGD Symbol;Acc:1309663]                                                       | 2 |
| ENSRNOG000000011310  | 147.84   | 122.41  | 173.26   | 1.42 | 0.50   | 0.004866 | 0.030953067 | Pde10a   | phosphodiesterase 10A [Source:RGD Symbol;Acc:68434]                                                    | 5 |
| ENSRNOG000000024457  | 99.66    | 87.20   | 112.12   | 1.29 | 0.36   | 0.077891 | 0.254178923 | Pde11a   | phosphodiesterase 11A [Source:RGD Symbol;Acc:621793]                                                   | 5 |
| ENSRNOG000000036828  | 276.81   | 271.39  | 282.23   | 1.04 | 0.06   | 0.776437 | 0.996231235 | Pde1b    | phosphodiesterase 1B, calmodulin-dependent [Source:RGD Symbol;Acc:3278]                                | 2 |
| ENSRNOG000000012337  | 930.53   | 790.27  | 1070.79  | 1.35 | 0.44   | 1.25E-05 | 0.000190492 | Pde1c    | phosphodiesterase 1C [Source:RGD Symbol;Acc:68332]                                                     | 2 |
| ENSRNOG000000019518  | 368.25   | 393.85  | 342.65   | 0.87 | -0.20  | 0.123951 | 0.348169943 | Pde4c    | phosphodiesterase 4C, cAMP-specific [Source:RGD Symbol;Acc:727918]                                     | 5 |
| ENSRNOG000000018610  | 1493.02  | 1345.49 | 1640.54  | 1.22 | 0.29   | 0.001324 | 0.010639744 | Pde6d    | phosphodiesterase 6d, cGMP-specific, rod, delta [Source:RGD Symbol;Acc:1306204]                        | 2 |
| ENSRNOG000000019005  | 246.96   | 242.55  | 251.37   | 1.04 | 0.05   | 0.773316 | 0.994472397 | Pde8a    | phosphodiesterase 8A [Source:RGD Symbol;Acc:735125]                                                    | 2 |
| ENSRNOG000000017197  | 306.74   | 334.83  | 278.65   | 0.83 | -0.26  | 0.076713 | 0.251467711 | Pdgfrb   | platelet-derived growth factor beta polypeptide [Source:RGD Symbol;Acc:3283]                           | 1 |
| ENSRNOG000000016166  | 1805.47  | 1703.75 | 1907.18  | 1.12 | 0.16   | 0.058033 | 0.206601111 | Pdlim1   | PDZ and LIM domain 1 [Source:RGD Symbol;Acc:68324]                                                     | 2 |
| ENSRNOG000000008543  | 351.86   | 427.95  | 275.77   | 0.64 | -0.63  | 6.82E-06 | 0.00010981  | Pdlim2   | PDZ and LIM domain 2 [Source:RGD Symbol;Acc:1359203]                                                   | 2 |
| ENSRNOG000000026036  | 23.99    | 21.37   | 26.61    | 1.25 | 0.32   | 0.378559 | 0.694603181 | Pdyn     | prodynorphin [Source:RGD Symbol;Acc:62054]                                                             | 4 |
| ENSRNOG000000008943  | 269.57   | 330.22  | 208.92   | 0.63 | -0.66  | 6.59E-06 | 0.00010653  | Penk     | proenkephalin [Source:RGD Symbol;Acc:68946]                                                            | 1 |
| ENSRNOG000000007387  | 1154.46  | 1212.20 | 1096.73  | 0.90 | -0.14  | 0.180941 | 0.448396563 | Per1     | period circadian clock 1 [Source:RGD Symbol;Acc:727863]                                                | 1 |
| ENSRNOG000000020254  | 317.14   | 316.01  | 318.26   | 1.01 | 0.01   | 0.913114 | 1           | Per2     | period circadian clock 2 [Source:RGD Symbol;Acc:61945]                                                 | 1 |
| ENSRNOG000000014402  | 5.97     | 7.25    | 4.68     | 0.65 | -0.63  | 0.319073 | 0.631119883 | Pgpep1l  | pyroglutamyl-peptidase I-like [Source:MGI Symbol;Acc:MGI:1925694]                                      | 3 |
| ENSRNOG000000014264  | 442.19   | 368.61  | 515.77   | 1.40 | 0.48   | 9.21E-05 | 0.00112222  | Phactr1  | phosphatase and actin regulator 1 [Source:RGD Symbol;Acc:1303187]                                      | 2 |
| ENSRNOG000000007524  | 343.06   | 338.89  | 347.23   | 1.02 | 0.04   | 0.849425 | 1           | Phactr3  | phosphatase and actin regulator 3 [Source:RGD Symbol;Acc:1303029]                                      |   |

|                     |           |           |         |      |        |          |              |           |                                                                                                                                           |   |
|---------------------|-----------|-----------|---------|------|--------|----------|--------------|-----------|-------------------------------------------------------------------------------------------------------------------------------------------|---|
| ENSRNOG00000012095  | 1154.49   | 970.18    | 1338.79 | 1.38 | 0.46   | 9.68E-07 | 1.92E-05     | Pkia      | protein kinase (cAMP-dependent, catalytic) inhibitor alpha [Source:RGD Symbol;Acc:621021]                                                 | 3 |
| ENSRNOG00000010235  | 1743.46   | 1777.58   | 1709.34 | 0.96 | -0.06  | 0.472797 | 0.780237584  | Pkig      | protein kinase (cAMP-dependent, catalytic) inhibitor gamma [Source:RGD Symbol;Acc:628775]                                                 | 2 |
| ENSRNOG00000028856  | 1674.07   | 1544.96   | 1803.18 | 1.17 | 0.22   | 0.101016 | 0.055522015  | Pknx2     | PBX/knotted 1 homeobox 2 [Source:RGD Symbol;Acc:1590611]                                                                                  | 2 |
| ENSRNOG00000015152  | 11.02     | 13.33     | 8.71    | 0.65 | -0.61  | 0.213144 | 0.49763947   | Pkp3      | plakophilin 3 [Source:RGD Symbol;Acc:1309133]                                                                                             | 2 |
| ENSRNOG00000005504  | 1480.32   | 1023.18   | 1937.46 | 1.89 | 0.92   | 1.21E-23 | 1.15E-21     | Pkp4      | plakophilin 4 [Source:RGD Symbol;Acc:1307840]                                                                                             | 2 |
| ENSRNOG00000046619  | 0.37      | 0.48      | 0.26    | 0.54 | -0.89  | 0.947513 |              | Pla2g12b  | phospholipase A2, group XIIb [Source:RGD Symbol;Acc:1588484]                                                                              | 3 |
| ENSRNOG00000002657  | 46.05     | 64.54     | 27.57   | 0.43 | -1.23  | 4.98E-06 | 8.35E-05     | Pla2g4a   | phospholipase A2, group IVA (cytosolic, calcium-dependent) [Source:RGD Symbol;Acc:67366]                                                  | 1 |
| ENSRNOG00000007447  | 1120.23   | 1293.27   | 947.19  | 0.73 | -0.45  | 3.10E-06 | 5.52E-05     | Pla2g4b   | phospholipase A2, group IVB (cytosolic) [Source:RGD Symbol;Acc:1308658]                                                                   | 1 |
| ENSRNOG00000012295  | 2575.76   | 2503.59   | 2647.93 | 1.06 | 0.08   | 0.254156 | 0.551817464  | Pla2g6    | phospholipase A2, group VI (cytosolic, calcium-independent) [Source:RGD Symbol;Acc:628867]                                                | 2 |
| ENSRNOG000000025587 | 130.01    | 84.06     | 175.95  | 2.09 | 1.07   | 2.41E-08 | 6.46E-07     | Plag1     | pleiomorphic adenoma gene-like 1 [Source:RGD Symbol;Acc:3014]                                                                             | 2 |
| ENSRNOG00000010516  | 136.09    | 178.44    | 93.74   | 0.53 | -0.93  | 3.77E-07 | 8.18E-06     | Plau      | plasminogen activator, urokinase [Source:RGD Symbol;Acc:3343]                                                                             | 2 |
| ENSRNOG00000007931  | 388.00    | 397.54    | 378.47  | 0.95 | -0.07  | 0.49974  | 0.803359186  | Plaur     | plasminogen activator, urokinase receptor [Source:RGD Symbol;Acc:620597]                                                                  | 7 |
| ENSRNOG000000004810 | 222.00    | 183.66    | 260.34  | 1.42 | 0.50   | 0.001618 | 0.012620574  | Plcb1     | phospholipase C, beta 1 (phosphoinositide-specific) [Source:RGD Symbol;Acc:3344]                                                          | 1 |
| ENSRNOG000000021150 | 4972.03   | 5019.84   | 4924.22 | 0.98 | -0.03  | 0.708445 | 0.954668746  | Plcb3     | phospholipase C, beta 3 (phosphatidylinositol-specific) [Source:RGD Symbol;Acc:61993]                                                     | 7 |
| ENSRNOG00000003119  | 607.43    | 591.87    | 622.99  | 1.05 | 0.07   | 0.498817 | 0.802833523  | Plcb4     | phospholipase C, beta 4 [Source:RGD Symbol;Acc:3345]                                                                                      | 1 |
| ENSRNOG00000016340  | 3520.48   | 3585.35   | 3455.62 | 0.96 | -0.05  | 0.491402 | 0.796043483  | Plcg1     | phospholipase C, gamma 1 [Source:RGD Symbol;Acc:3347]                                                                                     | 1 |
| ENSRNOG000000032659 | 245.29    | 196.84    | 293.75  | 1.49 | 0.58   | 0.000256 | 0.002743351  | Plcl1     | phospholipase C-like 1 [Source:RGD Symbol;Acc:708420]                                                                                     | 6 |
| ENSRNOG000000013368 | 258.21    | 282.93    | 233.48  | 0.83 | -0.28  | 0.006789 | 0.213733948  | Plcl2     | phospholipase C-like 2 [Source:RGD Symbol;Acc:1305941]                                                                                    | 5 |
| ENSRNOG000000014550 | 287.68    | 205.80    | 369.57  | 1.80 | 0.84   | 1.03E-08 | 2.96E-07     | Pldc3     | phosphatidylinositol-specific phospholipase C, X domain containing 3 [Source:RGD Symbol;Acc:1308448]                                      | 5 |
| ENSRNOG00000003997  | 193.58    | 103.85    | 283.31  | 2.73 | 1.45   | 7.47E-17 | 4.95E-15     | Pld5      | phospholipase D family, member 5 [Source:RGD Symbol;Acc:1562609]                                                                          | 5 |
| ENSRNOG00000010098  | 14.78     | 18.65     | 10.92   | 0.59 | -0.77  | 0.052411 | 0.192116323  | Plek2     | pleckstrin 2 [Source:RGD Symbol;Acc:1305786]                                                                                              | 5 |
| ENSRNOG000000011830 | 608.70    | 595.92    | 621.47  | 1.04 | 0.06   | 0.630664 | 0.900483361  | Plekha3   | pleckstrin homology domain-containing, family A (phosphoinositide binding specific) member 3 [Source:RGD Symbol;Acc:6211175]              | 2 |
| ENSRNOG000000008747 | 2386.73   | 2339.93   | 2433.52 | 1.04 | 0.06   | 0.500106 | 0.803822323  | Plekha5   | pleckstrin homology domain-containing, family A member 5 [Source:RGD Symbol;Acc:6211175]                                                  | 2 |
| ENSRNOG000000048096 | 591.11    | 553.46    | 628.76  | 1.14 | 0.18   | 0.095228 | 0.292745448  | Plekha5   | pleckstrin homology domain-containing, family A member 6 [Source:MGJ Symbol;Acc:MGJ:2388662]                                              | 2 |
| ENSRNOG000000021170 | 1949.12   | 2091.04   | 1807.20 | 0.86 | -0.21  | 0.014067 | 0.071447167  | Plekha1   | pleckstrin homology domain-containing, family O member 1 [Source:RGD Symbol;Acc:1311487]                                                  | 2 |
| ENSRNOG000000018815 | 68.59     | 82.11     | 55.06   | 0.67 | -0.58  | 0.011958 | 0.062923207  | Plk1      | polo-like kinase 1 [Source:RGD Symbol;Acc:3352]                                                                                           | 2 |
| ENSRNOG000000007970 | 930.20    | 746.82    | 1113.58 | 1.49 | 0.58   | 6.64E-09 | 1.98E-07     | Plxnc1    | plexin C1 [Source:RGD Symbol;Acc:1307420]                                                                                                 | 5 |
| ENSRNOG000000005358 | 5615.50   | 5573.42   | 5657.58 | 1.02 | 0.02   | 0.811637 |              | Pmm1      | phosphomannomutase 1 [Source:RGD Symbol;Acc:1310897]                                                                                      | 2 |
| ENSRNOG000000003338 | 161529.03 | 170887.48 | #####   | 0.89 | -0.17  | 0.156243 | 0.409120632  | Pmp22     | peripheral myelin protein 22 [Source:RGD Symbol;Acc:3359]                                                                                 | 1 |
| ENSRNOG000000008782 | 3386.63   | 3557.64   | 3215.62 | 0.90 | -0.15  | 0.064971 | 0.223378475  | Pnir      | PNN-interacting serine/arginine-rich protein [Source:RGD Symbol;Acc:1307395]                                                              | 2 |
| ENSRNOG000000004061 | 2146.22   | 2308.69   | 1983.76 | 0.86 | -0.22  | 0.007646 | 0.044411668  | Pnn       | pinin, desmosome associated protein [Source:RGD Symbol;Acc:1597086]                                                                       | 2 |
| ENSRNOG000000014231 | 7.27      | 6.91      | 7.63    | 1.11 | 0.14   | 0.853977 |              | Pnoc      | prepronociceptin [Source:RGD Symbol;Acc:3362]                                                                                             | 4 |
| ENSRNOG000000009982 | 1640.60   | 1814.26   | 1466.93 | 0.81 | -0.31  | 0.000377 | 0.003773846  | Pnp       | purine nucleoside phosphorylase [Source:RGD Symbol;Acc:1597189]                                                                           | 2 |
| ENSRNOG000000022268 | 843.36    | 773.09    | 913.62  | 1.18 | 0.24   | 0.016926 | 0.082784862  | Pnp3a     | patatin-like phospholipase domain containing 3 [Source:RGD Symbol;Acc:1595843]                                                            | 2 |
| ENSRNOG000000020906 | 277.34    | 309.76    | 244.92  | 0.79 | -0.34  | 0.019845 | 0.093601155  | Pola2     | polymerase (DNA directed), alpha 2, accessory subunit [Source:RGD Symbol;Acc:621817]                                                      | 2 |
| ENSRNOG000000019681 | 333.53    | 377.58    | 289.48  | 0.77 | -0.38  | 0.007873 | 0.045554911  | Pold1     | polymerase (DNA directed), delta 1, catalytic subunit [Source:RGD Symbol;Acc:621839]                                                      | 2 |
| ENSRNOG000000025373 | 245.12    | 237.67    | 252.56  | 1.06 | 0.09   | 0.580518 | 0.866683671  | Polk      | polymerase (DNA directed) kappa [Source:RGD Symbol;Acc:620058]                                                                            | 2 |
| ENSRNOG000000012686 | 432.55    | 775.61    | 89.50   | 0.12 | -3.12  | 9.07E-97 | 5.02E-94     | Pomc      | proopiomelanocortin [Source:RGD Symbol;Acc:3366]                                                                                          | 6 |
| ENSRNOG00000001199  | 455.92    | 464.67    | 447.16  | 0.96 | -0.06  | 0.647384 | 0.913621063  | Pop5      | processing of precursor 5, ribonuclease P/MRP subunit (S. cerevisiae) [Source:RGD Symbol;Acc:1311819]                                     | 2 |
| ENSRNOG000000047102 | 470.55    | 414.16    | 526.94  | 1.27 | 0.35   | 0.006493 | 0.03913862   | Popdc3    | popeye domain containing 3 [Source:RGD Symbol;Acc:1590760]                                                                                | 2 |
| ENSRNOG000000001442 | 2911.03   | 3153.78   | 2668.27 | 0.85 | -0.24  | 0.003525 | 0.023835007  | Por       | P450 (cytochrome) oxidoreductase [Source:RGD Symbol;Acc:68335]                                                                            | 1 |
| ENSRNOG000000020381 | 12.03     | 13.26     | 10.80   | 0.81 | -0.30  | 0.534268 | 0.83315454   | Pou2f2    | POU class 2 homeobox 2 [Source:RGD Symbol;Acc:621690]                                                                                     | 2 |
| ENSRNOG000000009669 | 1210.63   | 1120.26   | 1301.00 | 1.16 | 0.22   | 0.013094 | 0.0067530879 | Pou4f1    | POU class 4 homeobox 1 [Source:RGD Symbol;Acc:620074]                                                                                     | 2 |
| ENSRNOG000000012167 | 571.68    | 490.33    | 653.04  | 1.33 | 0.41   | 0.000575 | 0.005371656  | Pou4f2    | POU class 4 homeobox 2 [Source:RGD Symbol;Acc:620075]                                                                                     | 2 |
| ENSRNOG000000046487 | 3.87      | 4.52      | 3.21    | 0.71 | -0.49  | 0.543449 | 0.83315454   | Pou5f1    | POU class 5 homeobox 1 [Source:RGD Symbol;Acc:1359491]                                                                                    | 1 |
| ENSRNOG000000020424 | 458.06    | 450.26    | 465.85  | 1.03 | 0.05   | 0.775933 | 0.996010609  | Ppapidc1a | phosphatidic acid phosphatase type 2 domain containing 1A [Source:RGD Symbol;Acc:1306289]                                                 | 3 |
| ENSRNOG000000015568 | 376.59    | 379.94    | 373.23  | 0.98 | -0.03  | 0.873075 |              | Ppapidc1b | phosphatidic acid phosphatase type 2 domain containing 1B [Source:RGD Symbol;Acc:1591734]                                                 | 1 |
| ENSRNOG000000021463 | 42.87     | 38.98     | 46.76   | 1.20 | 0.26   | 0.314923 | 0.625975791  | Pparg     | peroxisome proliferator activated receptor alpha [Source:RGD Symbol;Acc:3369]                                                             | 2 |
| ENSRNOG000000008839 | 84.11     | 85.68     | 82.55   | 0.96 | -0.05  | 0.774928 | 0.995449268  | Pparg     | peroxisome proliferator-activated receptor gamma [Source:RGD Symbol;Acc:3371]                                                             | 1 |
| ENSRNOG000000027331 | 2095.70   | 1843.80   | 2347.59 | 1.27 | 0.35   | 4.81E-05 | 0.000638826  | Ppef1     | protein phosphatase, EF-hand calcium binding domain 1 [Source:RGD Symbol;Acc:1562772]                                                     | 5 |
| ENSRNOG000000004353 | 744.63    | 640.02    | 849.24  | 1.33 | 0.41   | 0.000178 | 0.00199556   | Ppfia2    | protein tyrosine phosphatase, receptor type, f polypeptide (PTPRF), interacting protein (liprin), alpha 2 [Source:RGD Symbol;Acc:1311051] | 5 |
| ENSRNOG000000015552 | 623.01    | 633.55    | 612.47  | 0.97 | -0.05  | 0.712163 | 0.957292115  | Ppil4     | peptidylprolyl isomerase (cyclophilin)-like 4 [Source:RGD Symbol;Acc:1311051]                                                             | 5 |
| ENSRNOG000000002930 | 116.07    | 128.27    | 103.87  | 0.81 | -0.30  | 0.12629  | 0.352522456  | Ppl       | perilakin [Source:RGD Symbol;Acc:1305511]                                                                                                 | 5 |
| ENSRNOG000000016599 | 14.58     | 12.97     | 16.20   | 1.25 | 0.32   | 0.447562 | 0.764558524  | Ppm1n     | protein phosphatase, Mg2+/Mn2+ dependent, 1N [Source:RGD Symbol;Acc:1562091]                                                              | 5 |
| ENSRNOG000000003567 | 736.77    | 817.28    | 656.27  | 0.80 | -0.32  | 0.003807 | 0.012328676  | Ppox      | protoporphyrinogen oxidase [Source:RGD Symbol;Acc:1310543]                                                                                | 2 |
| ENSRNOG000000021151 | 349.00    | 385.95    | 312.05  | 0.81 | -0.31  | 0.025953 | 0.114709643  | Ppp1r14b  | protein phosphatase 1, regulatory (inhibitor) subunit 14B [Source:RGD Symbol;Acc:628702]                                                  | 2 |
| ENSRNOG000000036827 | 1670.78   | 1644.75   | 1696.80 | 1.03 | 0.04   | 0.666772 | 0.927410259  | Ppp1r1a   | protein phosphatase 1, regulatory (inhibitor) subunit 1A [Source:RGD Symbol;Acc:62018]                                                    | 5 |
| ENSRNOG000000028404 | 1041.15   | 1014.20   | 1068.11 | 1.05 | 0.07   | 0.466656 | 0.780237584  | Ppp1r1b   | protein phosphatase 1, regulatory (inhibitor) subunit 1B [Source:RGD Symbol;Acc:621859]                                                   | 1 |
| ENSRNOG000000024990 | 7636.20   | 6449.46   | 8822.95 | 1.37 | 0.45   | 2.85E-09 | 9.18E-08     | Ppp1r1c   | protein phosphatase 1, regulatory (inhibitor) subunit 1C [Source:RGD Symbol;Acc:1562095]                                                  | 1 |
| ENSRNOG000000001733 | 5836.84   | 5182.16   | 6491.51 | 1.25 | 0.33   | 2.66E-05 | 0.000376659  | Ppp1r2    | protein phosphatase 1, regulatory (inhibitor) subunit 2 [Source:RGD Symbol;Acc:621099]                                                    | 2 |
| ENSRNOG000000036690 | 0.73      | 0.48      | 0.97    | 2.04 | 1.03   | 0.770969 | 0.992943861  | Ppp1r27   | protein phosphatase 1, regulatory subunit 27 [Source:RGD Symbol;Acc:1308861]                                                              | 2 |
| ENSRNOG000000050881 | 0.42      | 0.85      | 0.00    | 0.00 | #NAME? | 0.238921 | 0.530704828  | Ppp1r35   | protein phosphatase 1, regulatory subunit 35 [Source:RGD Symbol;Acc:1584367]                                                              | 2 |
| ENSRNOG000000009882 | 6098.88   | 5553.49   | 6644.27 | 1.20 | 0.26   | 0.000578 | 0.005392871  | Ppp3ca    | protein phosphatase 3, catalytic subunit, alpha isoform [Source:RGD Symbol;Acc:3382]                                                      | 1 |
| ENSRNOG000000009745 | 853.97    | 804.09    | 903.85  | 1.12 | 0.17   | 0.105591 | 0.314753717  | Ppp3cc    | protein phosphatase 3, catalytic subunit, gamma isoform [Source:MGJ Symbol;Acc:MGJ:107162]                                                | 6 |
| ENSRNOG000000043210 | 7193.74   | 6774.53   | 7612.96 | 1.12 | 0.17   | 0.032306 | 0.134616375  | Ppp3r1    | protein phosphatase 3, regulatory subunit B, alpha [Source:RGD Symbol;Acc:69230]                                                          | 1 |
| ENSRNOG000000005368 | 0.82      | 0.29      | 1.35    | 4.68 | 1.23   | 0.217889 | 0.4456998    | Ppp3r2    | protein phosphatase 3, regulatory subunit B, beta [Source:RGD Symbol;Acc:69232]                                                           | 1 |
| ENSRNOG000000000435 | 994.36    | 1072.39   | 916.33  | 0.85 | -0.23  | 0.024151 | 0.108880248  | Ppt2      | palmitoyl-protein thioesterase 2 [Source:RGD Symbol;Acc:620375]                                                                           | 1 |
| ENSRNOG000000005126 | 2408.00   | 2156.85   | 2659.15 | 1.23 | 0.30   | 0.000279 | 0.00294018   | Pqlc3     | PQ loop repeat containing 3 [Source:RGD Symbol;Acc:1306818]                                                                               | 5 |
| ENSRNOG000000013057 | 118.24    | 145.47    | 91.02   | 0.63 | -0.68  | 0.000549 | 0.005173862  | Prc1      | protein regulator of cytokinesis 1 [Source:RGD Symbol;Acc:1311754]                                                                        | 2 |
| ENSRNOG00000009218  | 2268.67   | 2095.23   | 2442.12 | 1.17 | 0.22   | 0.007357 | 0.043188515  | Prdm12    | PR domain containing 12 [Source:RGD Symbol;Acc:1586401]                                                                                   | 5 |
| ENSRNOG000000002004 | 232.83    | 234.23    | 231.43  | 0.99 | -0.02  | 0.956546 |              | Prdm8     | PR domain containing 8 [Source:RGD Symbol;Acc:1311628]                                                                                    | 5 |
| ENSRNOG000000006952 | 2496.55   | 2286.66   | 2706.45 | 1.18 | 0.24   | 0.002301 | 0.016889508  | Prex1     | primase, DNA, polypeptide 2 [Source:RGD Symbol;Acc:631433]                                                                                | 5 |
| ENSRNOG000000012486 | 259.82    | 265.78    | 253.86  | 0.96 | -0.07  | 0.640545 | 0.908879783  | Prim2     | primase, DNA, polypeptide 2 [Source:RGD Symbol;Acc:631433]                                                                                | 2 |
| ENSRNOG000000007706 | 150.73    | 126.72    | 174.75  | 1.38 | 0.46   | 0.008755 | 0.049661526  | Prkaa2    | protein kinase, AMP-activated, alpha 2 catalytic subunit [Source:RGD Symbol;Acc:620893]                                                   | 1 |
| ENSRNOG000000005257 | 4972.84   | 5176.31   | 4769.37 | 0.92 | -0.12  | 0.127842 | 0.35518645   | Prkaa3    | protein kinase, cAMP-dependent, catalytic, alpha [Source:RGD Symbol;Acc:3389]                                                             | 1 |
| ENSRNOG000000004978 | 559.16    | 475.72    | 642.59  | 1.35 |        |          |              |           |                                                                                                                                           |   |

|                     |          |          |          |      |        |          |             |          |                                                                                                                         |   |
|---------------------|----------|----------|----------|------|--------|----------|-------------|----------|-------------------------------------------------------------------------------------------------------------------------|---|
| ENSRNOG00000014376  | 2.26     | 2.11     | 2.42     | 1.15 | 0.20   | 0.797955 | 1           | Proc     | protein C [Source:RGD Symbol;Acc:3411]                                                                                  | 3 |
| ENSRNOG00000010898  | 1.55     | 1.83     | 1.27     | 0.69 | -0.53  | 0.709694 | 0.955185581 | Prok2    | prokineticin 2 [Source:RGD Symbol;Acc:620280]                                                                           | 1 |
| ENSRNOG00000009556  | 109.32   | 90.79    | 127.84   | 1.41 | 0.49   | 0.010654 | 0.057560817 | Prokr1   | prokineticin receptor 1 [Source:RGD Symbol;Acc:708443]                                                                  | 1 |
| ENSRNOG00000019700  | 1.04     | 0.95     | 1.13     | 1.18 | 0.24   | 1        | 1           | Proz     | protein Z, vitamin K-dependent plasma glycoprotein [Source:RGD Symbol;Acc:1308666]                                      | 3 |
| ENSRNOG00000020438  | 1496.87  | 1520.35  | 1473.38  | 0.97 | -0.05  | 0.593001 | 0.869923662 | Prpf38b  | pre-mRNA processing factor 38B [Source:RGD Symbol;Acc:1562940]                                                          | 2 |
| ENSRNOG00000004521  | 954.27   | 915.43   | 993.12   | 1.08 | 0.12   | 0.270045 | 0.572837043 | Prpf39   | pre-mRNA processing factor 39 [Source:RGD Symbol;Acc:1308702]                                                           | 2 |
| ENSRNOG00000015643  | 99208.13 | 99836.29 | 98579.97 | 0.99 | -0.02  | 0.837171 | 1           | Prph     | peripherin [Source:RGD Symbol;Acc:3414]                                                                                 | 2 |
| ENSRNOG00000042094  | 3535.99  | 3516.55  | 3555.44  | 1.01 | 0.02   | 0.820728 | 1           | Prr13    | proline rich 13 [Source:RGD Symbol;Acc:1307129]                                                                         | 2 |
| ENSRNOG00000018518  | 581.62   | 623.30   | 539.94   | 0.87 | -0.21  | 0.089557 | 0.2811219   | Prr14    | proline rich 14 [Source:RGD Symbol;Acc:1594592]                                                                         | 2 |
| ENSRNOG00000049162  | 54.67    | 54.31    | 55.03    | 1.01 | 0.02   | 1        | 1           | Prr15l   | proline rich 15-like [Source:RGD Symbol;Acc:1592397]                                                                    | 3 |
| ENSRNOG00000047295  | 97.91    | 108.23   | 87.59    | 0.81 | -0.31  | 0.135977 | 0.372054999 | Prr22    | proline rich 22 [Source:RGD Symbol;Acc:1595447]                                                                         | 2 |
| ENSRNOG00000000433  | 1435.27  | 1564.70  | 1305.85  | 0.83 | -0.26  | 0.004535 | 0.02924188  | Prrt1    | proline-rich transmembrane protein 1 [Source:RGD Symbol;Acc:1359348]                                                    | 1 |
| ENSRNOG000000039388 | 106.66   | 109.81   | 103.51   | 0.94 | -0.09  | 0.712062 | 0.957269912 | Prrt4    | proline-rich transmembrane protein 4 [Source:RGD Symbol;Acc:1559885]                                                    | 5 |
| ENSRNOG00000006299  | 55.91    | 84.27    | 27.55    | 0.33 | -1.61  | 4.63E-10 | 1.66E-08    | Prrx2    | paired related homeobox 2 [Source:RGD Symbol;Acc:1311471]                                                               | 2 |
| ENSRNOG00000018369  | 48683.81 | 57421.24 | 39946.37 | 0.70 | -0.52  | 3.87E-09 | 1.21E-07    | Prx      | periaxin [Source:RGD Symbol;Acc:619960]                                                                                 | 1 |
| ENSRNOG00000019435  | 457.73   | 488.41   | 427.06   | 0.87 | -0.19  | 0.13994  | 0.379149592 | Psd      | pleckstrin and Sec7 domain containing [Source:RGD Symbol;Acc:620297]                                                    | 5 |
| ENSRNOG00000006079  | 57.17    | 76.89    | 37.45    | 0.49 | -1.04  | 2.15E-05 | 0.000311121 | Psd4     | pleckstrin and Sec7 domain containing 4 [Source:RGD Symbol;Acc:1310289]                                                 | 3 |
| ENSRNOG00000042250  | 0.11     | 0.00     | 0.22     | Inf  | Inf    | 1        | 1           | Psg16    | pregnancy specific glycoprotein 16 [Source:RGD Symbol;Acc:1563849]                                                      | 2 |
| ENSRNOG00000011498  | 1984.85  | 1832.87  | 2136.83  | 1.17 | 0.22   | 0.011038 | 0.059081184 | Psp1     | PC4 and SFRS1 interacting protein 1 [Source:RGD Symbol;Acc:631439]                                                      | 2 |
| ENSRNOG00000019868  | 3603.16  | 3476.13  | 3730.19  | 1.07 | 0.10   | 0.21704  | 0.502573363 | Psma5    | proteasome (prosome, macropain) subunit, alpha type 5 [Source:RGD Symbol;Acc:61848]                                     | 2 |
| ENSRNOG00000000456  | 124.33   | 148.36   | 100.31   | 0.68 | -0.56  | 0.00246  | 0.017867096 | Psmb8    | proteasome (prosome, macropain) subunit, beta type, 8 [Source:RGD Symbol;Acc:3426]                                      | 1 |
| ENSRNOG00000000459  | 243.91   | 295.56   | 192.26   | 0.65 | -0.62  | 8.46E-05 | 0.001043884 | Psmb9    | proteasome (prosome, macropain) subunit, beta type, 9 [Source:RGD Symbol;Acc:3427]                                      | 1 |
| ENSRNOG00000019041  | 1116.35  | 1240.76  | 991.93   | 0.80 | -0.32  | 0.000588 | 0.005466469 | Psmc1    | proteasome (prosome, macropain) activator subunit 1 [Source:RGD Symbol;Acc:3429]                                        | 2 |
| ENSRNOG00000039265  | 690.23   | 685.21   | 695.26   | 1.01 | 0.02   | 0.873383 | 1           | Psmg4    | proteasome (prosome, macropain) assembly chaperone 4 [Source:RGD Symbol;Acc:1589955]                                    | 1 |
| ENSRNOG00000016987  | 127.95   | 123.60   | 132.30   | 1.07 | 0.10   | 0.60311  | 0.878322245 | Pstpip2  | proline-serine-threonine phosphatase-interacting protein 2 [Source:RGD Symbol;Acc:1563090]                              | 5 |
| ENSRNOG00000013231  | 163.24   | 183.08   | 143.40   | 0.78 | -0.35  | 0.043684 | 0.168028571 | Ptacr    | platelet-activating factor receptor [Source:RGD Symbol;Acc:61897]                                                       | 1 |
| ENSRNOG00000013231  | 163.24   | 183.08   | 143.40   | 0.78 | -0.35  | 0.043684 | 0.168028571 | Ptacr    | platelet-activating factor receptor [Source:RGD Symbol;Acc:61897]                                                       | 2 |
| ENSRNOG00000016334  | 218.68   | 191.68   | 245.67   | 1.28 | 0.36   | 0.026334 | 0.115812746 | Ptpb3    | polypyrimidine tract binding protein 3 [Source:RGD Symbol;Acc:621671]                                                   | 2 |
| ENSRNOG000000020723 | 1124.59  | 1009.11  | 1240.07  | 1.23 | 0.30   | 0.002224 | 0.016459277 | Pten     | phosphatase and tensin homolog [Source:RGD Symbol;Acc:61995]                                                            | 2 |
| ENSRNOG00000031535  | 239.89   | 226.31   | 253.47   | 1.12 | 0.16   | 0.313627 | 0.624401756 | Ptgdr    | prostaglandin D2 receptor [Source:RGD Symbol;Acc:619707]                                                                | 7 |
| ENSRNOG00000015550  | 11698.37 | 9219.82  | 14176.91 | 1.54 | 0.62   | 1.74E-18 | 1.25E-16    | Ptgds    | prostaglandin D2 synthase (brain) [Source:RGD Symbol;Acc:3433]                                                          | 1 |
| ENSRNOG00000004094  | 317.55   | 326.86   | 308.24   | 0.94 | -0.08  | 0.571171 | 0.854894919 | Ptger1   | prostaglandin E receptor 1 (subtype EP1) [Source:RGD Symbol;Acc:3434]                                                   | 1 |
| ENSRNOG00000004094  | 317.55   | 326.86   | 308.24   | 0.94 | -0.08  | 0.571171 | 0.854894919 | Ptger1   | prostaglandin E receptor 1 (subtype EP1) [Source:RGD Symbol;Acc:3434]                                                   | 2 |
| ENSRNOG000000050968 | 121.27   | 116.73   | 125.80   | 1.08 | 0.11   | 0.580177 | 0.862864963 | Ptger2   | prostaglandin E receptor 2 (subtype EP2) [Source:RGD Symbol;Acc:620020]                                                 | 7 |
| ENSRNOG00000010325  | 111.48   | 100.17   | 122.80   | 1.23 | 0.29   | 0.147355 | 0.39309317  | Ptger3   | prostaglandin E receptor 3 (subtype EP3) [Source:RGD Symbol;Acc:3435]                                                   | 6 |
| ENSRNOG00000013240  | 160.27   | 149.27   | 171.27   | 1.15 | 0.20   | 0.273968 | 0.578345137 | Ptger4   | prostaglandin E receptor 4 (subtype EP4) [Source:RGD Symbol;Acc:628641]                                                 | 1 |
| ENSRNOG00000006320  | 149.43   | 179.21   | 119.65   | 0.67 | -0.58  | 0.002148 | 0.015986419 | Ptges    | prostaglandin E synthase [Source:RGD Symbol;Acc:62076]                                                                  | 1 |
| ENSRNOG00000046468  | 320.57   | 297.25   | 343.89   | 1.16 | 0.21   | 0.139522 | 0.378405893 | Ptgfr    | prostaglandin F receptor [Source:RGD Symbol;Acc:3436]                                                                   | 1 |
| ENSRNOG00000016756  | 946.09   | 855.34   | 1036.85  | 1.21 | 0.28   | 0.004943 | 0.031359299 | Ptgif    | prostaglandin I2 (prostacyclin) receptor (IP) [Source:RGD Symbol;Acc:1310890]                                           | 1 |
| ENSRNOG00000007415  | 212.85   | 246.51   | 179.19   | 0.73 | -0.46  | 0.00624  | 0.037910579 | Ptgs1    | prostaglandin-endoperoxide synthase 1 [Source:RGD Symbol;Acc:3439]                                                      | 1 |
| ENSRNOG00000002525  | 14.51    | 15.42    | 13.60    | 0.88 | -0.18  | 0.686968 | 0.94222258  | Ptgs2    | prostaglandin-endoperoxide synthase 2 [Source:RGD Symbol;Acc:620349]                                                    | 1 |
| ENSRNOG00000020681  | 0.39     | 0.51     | 0.27     | 0.53 | -0.92  | 0.947683 | 1           | Pth2     | parathyroid hormone 2 [Source:RGD Symbol;Acc:1559447]                                                                   | 1 |
| ENSRNOG00000025731  | 8203.47  | 8391.65  | 8015.29  | 0.96 | -0.07  | 0.376833 | 0.692726278 | Ptma     | parathyroid hormone-related protein alpha [Source:RGD Symbol;Acc:61829]                                                 | 5 |
| ENSRNOG00000016386  | 11464.97 | 12516.25 | 10413.70 | 0.83 | -0.27  | 0.000577 | 0.005381824 | Ptms     | parathyroid hormone-related protein beta [Source:RGD Symbol;Acc:621529]                                                 | 2 |
| ENSRNOG00000011946  | 19104.07 | 18212.36 | 19995.78 | 1.10 | 0.13   | 0.097272 | 0.296902287 | Ptn      | pleiotrophin [Source:RGD Symbol;Acc:3444]                                                                               | 1 |
| ENSRNOG00000013981  | 478.79   | 453.41   | 504.16   | 1.11 | 0.15   | 0.201775 | 0.480322002 | Ptpn5    | protein tyrosine phosphatase, non-receptor type 5 [Source:RGD Symbol;Acc:3448]                                          | 1 |
| ENSRNOG00000014294  | 262.27   | 347.73   | 176.81   | 0.51 | -0.98  | 1.22E-10 | 4.70E-09    | Ptpn6    | protein tyrosine phosphatase, non-receptor type 6 [Source:RGD Symbol;Acc:620660]                                        | 5 |
| ENSRNOG00000017600  | 1622.25  | 1463.81  | 1780.69  | 1.22 | 0.28   | 0.00142  | 0.01128536  | Ptpn9    | protein tyrosine phosphatase, non-receptor type 9 [Source:RGD Symbol;Acc:628726]                                        | 2 |
| ENSRNOG00000000655  | 164.21   | 244.81   | 83.60    | 0.34 | -1.55  | 1.29E-17 | 8.89E-16    | Ptpcr    | protein tyrosine phosphatase, receptor type, C [Source:RGD Symbol;Acc:3451]                                             | 2 |
| ENSRNOG00000006231  | 746.91   | 674.95   | 818.86   | 1.21 | 0.28   | 0.011481 | 0.061041268 | Ptpco    | protein tyrosine phosphatase, receptor type, O [Source:RGD Symbol;Acc:62068]                                            | 2 |
| ENSRNOG00000004483  | 1407.39  | 1312.16  | 1502.62  | 1.15 | 0.20   | 0.036191 | 0.146422656 | Ptpcr    | protein tyrosine phosphatase, receptor type, R [Source:RGD Symbol;Acc:620780]                                           | 2 |
| ENSRNOG000000032656 | 139.41   | 88.60    | 190.22   | 1.15 | 1.10   | 6.13E-09 | 1.84E-07    | Ptprr    | protein tyrosine phosphatase, receptor type, T [Source:RGD Symbol;Acc:1309653]                                          | 5 |
| ENSRNOG00000013515  | 666.47   | 744.53   | 588.41   | 0.79 | -0.34  | 0.002632 | 0.018893312 | Ptprru   | protein tyrosine phosphatase, receptor type, U [Source:RGD Symbol;Acc:620782]                                           | 1 |
| ENSRNOG00000006030  | 1878.01  | 1621.77  | 2134.25  | 1.32 | 0.40   | 4.20E-06 | 7.20E-05    | Ptprrz1  | protein tyrosine phosphatase, receptor-type, Z polypeptide 1 [Source:RGD Symbol;Acc:3455]                               | 2 |
| ENSRNOG000000049034 | 186.65   | 188.48   | 184.81   | 0.98 | -0.03  | 0.887062 | 1           | Ptprh1   | peptidyl-tRNA hydrolase 1 homolog (S. cerevisiae) [Source:RGD Symbol;Acc:1310165]                                       | 2 |
| ENSRNOG00000019062  | 399.00   | 386.84   | 411.15   | 1.06 | 0.09   | 0.473241 | 0.780237584 | Pura     | purine rich element binding protein A [Source:RGD Symbol;Acc:1308543]                                                   | 2 |
| ENSRNOG000000022354 | 532.87   | 572.36   | 493.39   | 0.86 | -0.21  | 0.097104 | 0.296659197 | Pus1l    | psuedouridylate synthase-like 1 [Source:RGD Symbol;Acc:1559560]                                                         | 2 |
| ENSRNOG00000006403  | 335.44   | 331.71   | 339.17   | 1.02 | 0.03   | 0.777754 | 0.997251325 | Pvr1     | poliovirus receptor-related 1 [Source:RGD Symbol;Acc:620791]                                                            | 5 |
| ENSRNOG00000003936  | 383.86   | 390.18   | 377.53   | 0.97 | -0.05  | 0.725491 | 0.96600357  | Pwpp2a   | PWWP domain containing 2A [Source:RGD Symbol;Acc:1305891]                                                               | 2 |
| ENSRNOG00000006388  | 1025.50  | 1103.18  | 947.82   | 0.86 | -0.22  | 0.027932 | 0.120968977 | Pygl     | phosphorylase, glycogen, liver [Source:RGD Symbol;Acc:620687]                                                           | 2 |
| ENSRNOG00000020877  | 0.12     | 0.24     | 0.00     | 0.00 | #NAME? | 0.964517 | 1           | Pyy      | peptide YY (mapped) [Source:RGD Symbol;Acc:1593289]                                                                     | 1 |
| ENSRNOG00000003253  | 6896.42  | 6826.53  | 6966.30  | 1.02 | 0.03   | 0.733303 | 0.971301608 | Qdpr     | quinoxid dihydropteridine reductase [Source:RGD Symbol;Acc:619915]                                                      | 1 |
| ENSRNOG00000007364  | 4645.11  | 4532.51  | 4757.71  | 1.05 | 0.07   | 0.367516 | 0.683467657 | Rab15    | RAB15, member RAS oncogene family [Source:RGD Symbol;Acc:735172]                                                        | 2 |
| ENSRNOG00000007533  | 727.41   | 737.14   | 717.67   | 0.97 | -0.04  | 0.720976 | 0.962613927 | Rab27a   | RAB27A, member RAS oncogene family [Source:RGD Symbol;Acc:620918]                                                       | 5 |
| ENSRNOG00000012176  | 137.32   | 106.96   | 167.67   | 1.57 | 0.65   | 0.000416 | 0.00100419  | Rab27b   | RAB27B, member RAS oncogene family [Source:RGD Symbol;Acc:620114]                                                       | 5 |
| ENSRNOG00000006698  | 599.07   | 563.45   | 634.70   | 1.13 | 0.17   | 0.145374 | 0.389386894 | Rab33a   | RAB33A, member RAS oncogene family [Source:RGD Symbol;Acc:1563280]                                                      | 2 |
| ENSRNOG000000020067 | 958.24   | 989.60   | 926.87   | 0.94 | -0.09  | 0.333608 | 0.646727144 | Rab40c   | Rab40c, member RAS oncogene family [Source:RGD Symbol;Acc:727914]                                                       | 2 |
| ENSRNOG00000001500  | 3443.19  | 3525.19  | 3361.19  | 0.95 | -0.07  | 0.369193 | 0.68549438  | Rab4b    | RAB4B, member RAS oncogene family [Source:RGD Symbol;Acc:620931]                                                        | 1 |
| ENSRNOG00000002736  | 681.27   | 614.81   | 747.73   | 1.22 | 0.28   | 0.013024 | 0.067252216 | Rabgap1  | RAB GTPase activating protein 1-like [Source:RGD Symbol;Acc:1304620]                                                    | 1 |
| ENSRNOG000000030483 | 1087.36  | 1156.51  | 1018.21  | 0.88 | -0.18  | 0.064215 | 0.221349216 | Rabgta   | Rab geranylgeranyltransferase, alpha subunit [Source:RGD Symbol;Acc:621697]                                             | 2 |
| ENSRNOG00000048172  | 1782.15  | 1909.18  | 1655.11  | 0.87 | -0.21  | 0.019922 | 0.093733009 | Rac3     | ras-related C3 botulinum toxin substrate 3 (rho family, small GTP binding protein Rac3) [Source:RGD Symbol;Acc:1309515] | 2 |
| ENSRNOG00000018353  | 608.26   | 590.10   | 626.41   | 1.06 | 0.09   | 0.481306 | 0.786232286 | Rad17    | RAD17 homolog (S. pombe) [Source:RGD Symbol;Acc:1309515]                                                                | 2 |
| ENSRNOG00000003026  | 1514.11  | 1646.97  | 1381.25  | 0.84 | -0.25  | 0.005912 | 0.036257419 | Rad23a   | RAD23 homolog A (S. cerevisiae) [Source:RGD Symbol;Acc:1309899]                                                         | 2 |
| ENSRNOG00000042647  | 136.19   | 132.36   | 140.01   | 1.06 | 0.08   | 0.679226 | 0.936564353 | Rad51ap1 | RAD51 associated protein 1 [Source:RGD Symbol;Acc:1597431]                                                              | 2 |
| ENSRNOG00000009742  | 279.19   | 299.76   | 258.62   | 0.86 | -0.21  | 0.153247 | 0.404093569 | Rad52    | RAD52 homolog (S. cerevisiae) [Source:RGD Symbol;Acc:1304975]                                                           | 6 |
| ENSRNOG000000004630 | 10.07    | 17.50    | 2.65     | 0.15 | -2.72  | 1.73E-07 | 4.01E-06    | Rag1     | recombination activating gene 1 [Source:RGD Symbol;Acc:619790]                                                          | 1 |
| ENSRNOG00000013461  | 4273.84  | 4255.52  | 4292.16  | 1.01 | 0.01   | 0.889175 | 1           | Ralbp1   | ralA binding protein 1 [Source:RGD Symbol;Acc:621134]                                                                   | 2 |
| ENSRNOG00000010219  | 2326.25  | 2274.71  | 2377.80  | 1.05 | 0.06   | 0.444186 | 0.763437784 | Ralgds   | ral guanine nucleotide dissociation stimulator [Source:RGD Symbol;Acc:3533]                                             | 2 |
| ENSRNOG00000016910  | 156.81   | 132.67   | 180.94   | 1.36 | 0.45   | 0.011302 | 0.060275908 | Ralgsps1 | Ral GEF with PH domain and SH3 binding motif 1 [Source:RGD Symbol;Acc:2319500]                                          | 2 |
| ENSRNOG00000018000  | 2008.87  | 1975.68  | 2042.06  | 1.03 | 0.05   | 0.582743 | 0.864677895 | Ranbp10  | RAN binding protein 10 [Source:RGD Symbol;Acc:1311587]                                                                  | 1 |
| ENSRNOG000000032463 | 2015.25  | 1901.16  | 2129.33  | 1.12 | 0.16   | 0.070106 | 0.235803345 | Rap1a    | RAP1A, member of RAS oncogene family [Source:RGD Symbol;Acc:1359694]                                                    | 2 |
| ENSRNOG00000014722  | 374.36   | 295.22   | 453.50   | 1.54 | 0.62   | 3.93E-06 | 6.80E-05    | Raph1    | Ras association (RalGDS/AF-6) and pleckstrin homology domains 1 [Source:RGD Symbol;Acc:1308387]                         | 2 |
| ENSRNOG00000012499  | 790.81   | 922.29   | 659.33   | 0.71 | -0.48  | 5.42E-06 | 9.01E-05    | Rarg     | retinoic acid receptor, gamma [Source:RGD Symbol;Acc:1583230]                                                           | 2 |
| ENSRNOG00000037853  | 3425.12  | 3095.30  | 3754.94  | 1.21 | 0.28   | 0.000428 | 0.004199446 | Rarres1  |                                                                                                                         |   |

|                      |          |          |          |      |       |          |             |         |                                                                                                        |   |
|----------------------|----------|----------|----------|------|-------|----------|-------------|---------|--------------------------------------------------------------------------------------------------------|---|
| ENSRNOG000000014161  | 667.28   | 695.26   | 639.30   | 0.92 | -0.12 | 0.277199 | 0.582436837 | Rbm15b  | RNA binding motif protein 15B [Source:RGD Symbol;Acc:1305937]                                          | 2 |
| ENSRNOG000000018767  | 1828.83  | 1898.72  | 1758.94  | 0.93 | -0.11 | 0.194696 | 0.470047977 | Rbm17   | RNA binding motif protein 17 [Source:RGD Symbol;Acc:1311208]                                           | 2 |
| ENSRNOG000000002874  | 794.68   | 807.31   | 782.06   | 0.97 | -0.05 | 0.633975 | 0.903141971 | Rbm25   | RNA binding motif protein 25 [Source:RGD Symbol;Acc:1308755]                                           | 2 |
| ENSRNOG000000006420  | 251.96   | 370.67   | 133.25   | 0.36 | -1.48 | 3.31E-20 | 2.60E-18    | Rbm38   | RNA binding motif protein 38 [Source:RGD Symbol;Acc:1308503]                                           | 2 |
| ENSRNOG000000019848  | 8.65     | 8.44     | 8.86     | 1.05 | 0.07  | 1        | 1           | Rbm39   | RNA binding motif protein 39 [Source:RGD Symbol;Acc:1310071]                                           | 2 |
| ENSRNOG000000004673  | 161.92   | 182.34   | 141.49   | 0.78 | -0.37 | 0.037827 | 0.151208773 | Rbm43   | RNA binding motif protein 43 [Source:RGD Symbol;Acc:1306676]                                           | 2 |
| ENSRNOG000000018153  | 3971.80  | 4156.87  | 3786.74  | 0.91 | -0.13 | 0.073236 | 0.243263077 | Rbm5    | RNA binding motif protein 5 [Source:RGD Symbol;Acc:1305059]                                            | 2 |
| ENSRNOG000000008482  | 1025.93  | 964.92   | 1086.94  | 1.13 | 0.17  | 0.062458 | 0.21808243  | Rbms1   | RNA binding motif, single stranded interacting protein 1 [Source:RGD Symbol;Acc:1307777]               | 2 |
| ENSRNOG000000028858  | 255.08   | 261.27   | 248.89   | 0.95 | -0.07 | 0.637413 | 0.906180933 | Rbmx1b  | RNA binding motif protein, X-linked-like 1B [Source:RGD Symbol;Acc:1585845]                            | 1 |
| ENSRNOG000000018576  | 152.28   | 137.16   | 167.41   | 1.22 | 0.29  | 0.098774 | 0.300174728 | Rcan3   | RCAN family member 3 [Source:RGD Symbol;Acc:1311826]                                                   | 5 |
| ENSRNOG000000032446  | 160.00   | 178.69   | 141.31   | 0.79 | -0.34 | 0.068431 | 0.231465088 | Recq4   | RecQ protein-like 4 [Source:RGD Symbol;Acc:1307732]                                                    | 2 |
| ENSRNOG000000030888  | 1445.09  | 1582.52  | 1307.67  | 0.83 | -0.28 | 0.002178 | 0.016170628 | Rela    | v-rel avian reticuloendotheliosis viral oncogene homolog A [Source:RGD Symbol;Acc:727889]              | 1 |
| ENSRNOG000000021441  | 5098.83  | 4940.16  | 5257.51  | 1.06 | 0.09  | 0.218598 | 0.504579606 | Reln    | reelin [Source:RGD Symbol;Acc:3553]                                                                    | 1 |
| ENSRNOG000000014751  | 24530.04 | 22648.67 | 26411.41 | 1.17 | 0.22  | 0.004421 | 0.028607304 | Ret     | ret proto-oncogene [Source:RGD Symbol;Acc:3556]                                                        | 6 |
| ENSRNOG000000007596  | 772.48   | 676.82   | 868.13   | 1.28 | 0.36  | 0.000888 | 0.007705473 | Rffl    | ring finger and FYVE-like domain containing E3 ubiquitin protein ligase [Source:RGD Symbol;Acc:727916] | 2 |
| ENSRNOG000000007360  | 44.31    | 34.00    | 54.61    | 1.61 | 0.68  | 0.007641 | 0.04400098  | Rfx4    | regulatory factor X, 4 (influences HLA class II expression) [Source:RGD Symbol;Acc:1562092]            | 3 |
| ENSRNOG000000000474  | 988.33   | 1133.68  | 842.98   | 0.74 | -0.43 | 1.62E-05 | 0.000241635 | Rgl2    | ral guanine nucleotide dissociation stimulator-like 2 [Source:RGD Symbol;Acc:1302985]                  | 2 |
| ENSRNOG000000048190  | 1813.83  | 1687.17  | 1940.49  | 1.15 | 0.20  | 0.017517 | 0.085142201 | Rgmb    | repulsive guidance molecule family member B [Source:RGD Symbol;Acc:1595392]                            | 2 |
| ENSRNOG000000042592  | 3932.59  | 3834.13  | 4031.06  | 1.05 | 0.07  | 0.407922 | 0.727368026 | Rgs10   | regulator of G-protein signaling 10 [Source:RGD Symbol;Acc:3562]                                       | 5 |
| ENSRNOG000000020459  | 1419.30  | 1482.13  | 1356.47  | 0.92 | -0.13 | 0.16719  | 0.426167044 | Rgs11   | regulator of G-protein signaling 11 [Source:RGD Symbol;Acc:3563]                                       | 2 |
| ENSRNOG000000015616  | 184.57   | 213.57   | 155.56   | 0.73 | -0.46 | 0.006221 | 0.037839567 | Rgs14   | regulator of G-protein signaling 14 [Source:RGD Symbol;Acc:620003]                                     | 5 |
| ENSRNOG000000018690  | 136.72   | 103.21   | 170.24   | 1.65 | 0.72  | 0.000148 | 0.001695181 | Rgs17   | regulator of G-protein signaling 17 [Source:RGD Symbol;Acc:1305515]                                    | 2 |
| ENSRNOG000000016547  | 566.28   | 619.89   | 512.66   | 0.83 | -0.27 | 0.026464 | 0.116195123 | Rgs19   | regulator of G-protein signaling 19 [Source:RGD Symbol;Acc:629471]                                     | 2 |
| ENSRNOG00000003687   | 505.35   | 483.23   | 527.46   | 1.09 | 0.13  | 0.334331 | 0.647579968 | Rgs2    | regulator of G-protein signaling 2 [Source:RGD Symbol;Acc:621665]                                      | 1 |
| ENSRNOG000000024501  | 10300.97 | 9980.82  | 10621.12 | 1.06 | 0.09  | 0.241045 | 0.534012648 | Rgs3    | regulator of G-protein signaling 3 [Source:RGD Symbol;Acc:3566]                                        | 7 |
| ENSRNOG000000002773  | 16191.59 | 15319.71 | 17063.46 | 1.11 | 0.16  | 0.064988 | 0.223378475 | Rgs4    | regulator of G-protein signaling 4 [Source:RGD Symbol;Acc:3567]                                        | 5 |
| ENSRNOG000000002730  | 431.12   | 529.51   | 332.73   | 0.63 | -0.67 | 2.99E-07 | 6.65E-06    | Rgs5    | regulator of G-protein signaling 5 [Source:RGD Symbol;Acc:3568]                                        | 2 |
| ENSRNOG000000002369  | 547.19   | 457.34   | 637.05   | 1.39 | 0.48  | 6.66E-05 | 0.000849831 | Rgs8    | regulator of G-protein signaling 8 [Source:RGD Symbol;Acc:3571]                                        | 5 |
| ENSRNOG000000003800  | 47.46    | 56.23    | 38.69    | 0.69 | -0.54 | 0.039588 | 0.156020487 | Rgs9    | regulator of G-protein signaling 9 [Source:RGD Symbol;Acc:3572]                                        | 1 |
| ENSRNOG000000017130  | 48.83    | 88.13    | 9.53     | 0.11 | -3.21 | 4.28E-26 | 4.59E-24    | Rhd     | Rh blood group, D antigen [Source:RGD Symbol;Acc:620451]                                               | 2 |
| ENSRNOG000000021571  | 247.66   | 256.40   | 238.92   | 0.93 | -0.10 | 0.530329 | 0.829631056 | Rheb1   | Ras homolog enriched in brain like 1 [Source:RGD Symbol;Acc:727778]                                    | 2 |
| ENSRNOG000000013380  | 1355.83  | 1412.36  | 1299.29  | 0.92 | -0.12 | 0.178605 | 0.44549535  | Rhov    | ras homolog family member V [Source:RGD Symbol;Acc:628824]                                             | 2 |
| ENSRNOG000000031534  | 0.76     | 0.00     | 1.51     | Inf  | Inf   | 0.050025 | 0.185081202 | Rhox8   | reproductive homeobox 8 [Source:RGD Symbol;Acc:1561047]                                                | 3 |
| ENSRNOG0000000047652 | 8.42     | 6.31     | 10.53    | 1.67 | 0.74  | 0.126122 | 0.352197714 | Rims2   | regulating synaptic membrane exocytosis 2 [Source:RGD Symbol;Acc:620001]                               | 1 |
| ENSRNOG000000000467  | 1343.29  | 1455.55  | 1231.04  | 0.85 | -0.24 | 0.010188 | 0.055813754 | Ring1   | ring finger protein 1 [Source:RGD Symbol;Acc:3576]                                                     | 1 |
| ENSRNOG0000000025145 | 714.49   | 690.55   | 738.43   | 1.07 | 0.10  | 0.738019 | 0.717287025 | Rmdn1   | regulator of microtubule dynamics 1 [Source:RGD Symbol;Acc:1563085]                                    | 2 |
| ENSRNOG000000025625  | 745.70   | 888.63   | 602.78   | 0.68 | -0.56 | 3.02E-07 | 6.69E-06    | Rnase4  | ribonuclease, RNase A family 4 [Source:RGD Symbol;Acc:618223]                                          | 5 |
| ENSRNOG000000008584  | 506.21   | 494.28   | 518.14   | 1.05 | 0.07  | 0.595887 | 0.872710807 | Rnaseh1 | ribonuclease H1 [Source:RGD Symbol;Acc:1309012]                                                        | 5 |
| ENSRNOG000000027017  | 396.36   | 356.04   | 436.68   | 1.23 | 0.29  | 0.030229 | 0.127984645 | Rnasel  | ribonuclease L (2',5'-oligoadenylate synthetase-dependent) [Source:RGD Symbol;Acc:727933]              | 2 |
| ENSRNOG000000002364  | 3515.33  | 3484.50  | 3546.15  | 1.02 | 0.03  | 0.827642 | 1           | Rnf112  | ring finger protein 112 [Source:RGD Symbol;Acc:3986]                                                   | 5 |
| ENSRNOG000000007370  | 359.04   | 349.64   | 368.44   | 1.05 | 0.08  | 0.497249 | 0.801622925 | Rnf144a | ring finger protein 144A [Source:RGD Symbol;Acc:1561737]                                               | 5 |
| ENSRNOG000000018070  | 76.95    | 74.53    | 79.37    | 1.06 | 0.09  | 0.720295 | 0.962071241 | Rnf182  | ring finger protein 182 [Source:RGD Symbol;Acc:1560399]                                                | 5 |
| ENSRNOG000000009690  | 739.80   | 681.29   | 798.31   | 1.17 | 0.23  | 0.031173 | 0.130882394 | Rnf219  | ring finger protein 219 [Source:RGD Symbol;Acc:1564706]                                                | 2 |
| ENSRNOG000000019438  | 998.27   | 1047.10  | 949.45   | 0.91 | -0.14 | 0.156265 | 0.409120632 | Rnf31   | ring finger protein 31 [Source:RGD Symbol;Acc:1305513]                                                 | 2 |
| ENSRNOG000000013956  | 274.27   | 281.41   | 267.14   | 0.95 | -0.08 | 0.70875  | 0.954719112 | Rnf38   | ring finger protein 38 [Source:RGD Symbol;Acc:621856]                                                  | 2 |
| ENSRNOG000000017641  | 1053.97  | 1032.38  | 1075.55  | 1.04 | 0.06  | 0.444969 | 0.763437784 | Rnf44   | ring finger protein 44 [Source:RGD Symbol;Acc:1307212]                                                 | 2 |
| ENSRNOG000000000438  | 2285.84  | 2258.19  | 2313.50  | 1.02 | 0.03  | 0.691896 | 0.943449877 | Rnf5    | ring finger protein 5, E3 ubiquitin protein ligase [Source:RGD Symbol;Acc:1588458]                     | 1 |
| ENSRNOG000000011663  | 1544.14  | 1477.45  | 1610.83  | 1.09 | 0.12  | 0.162318 | 0.417968407 | Rnf7    | ring finger protein 7 [Source:RGD Symbol;Acc:1311048]                                                  | 2 |
| ENSRNOG000000016416  | 4999.57  | 5241.25  | 4757.90  | 0.91 | -0.14 | 0.070102 | 0.235803345 | Rnh1    | ribonuclease/angiogenin inhibitor 1 [Source:RGD Symbol;Acc:621398]                                     | 2 |
| ENSRNOG000000017310  | 337.44   | 315.49   | 359.39   | 1.14 | 0.19  | 0.199437 | 0.477206498 | Rnpc3   | RNA-binding region (RNP1, RRM) containing 3 [Source:RGD Symbol;Acc:1582776]                            | 2 |
| ENSRNOG000000008703  | 2676.11  | 2838.77  | 2513.45  | 0.89 | -0.18 | 0.028016 | 0.12123318  | Rnps1   | ribonucleic acid binding protein S1 [Source:RGD Symbol;Acc:1307522]                                    | 2 |
| ENSRNOG000000010974  | 225.13   | 223.85   | 226.41   | 1.01 | 0.02  | 0.996435 | 1           | Ror2    | receptor tyrosine kinase-like orphan receptor 2 [Source:RGD Symbol;Acc:1305275]                        | 2 |
| ENSRNOG000000008807  | 0.76     | 0.51     | 1.02     | 2.01 | 1.01  | 0.770566 | 0.992943861 | Rp1     | retinitis pigmentosa 1 (human) [Source:RGD Symbol;Acc:1596713]                                         | 3 |
| ENSRNOG000000029456  | 274.18   | 290.08   | 258.27   | 0.89 | -0.17 | 0.28503  | 0.590450649 | Rp9     | retinitis pigmentosa 9 (human) [Source:RGD Symbol;Acc:1559759]                                         | 2 |
| ENSRNOG000000015969  | 449.08   | 422.00   | 476.16   | 1.13 | 0.17  | 0.205561 | 0.486255545 | Rpf1    | ribosome production factor 1 homolog (S. cerevisiae) [Source:RGD Symbol;Acc:1559755]                   | 2 |
| ENSRNOG000000003013  | 151.69   | 133.84   | 169.55   | 1.27 | 0.34  | 0.071476 | 0.238919385 | RPGR    | Rpgr protein; Uncharacterized protein [Source:UniProtKB/TrEMBL;Acc:B1WC72]                             | 2 |
| ENSRNOG000000015335  | 294.34   | 304.86   | 283.82   | 0.93 | -0.10 | 0.491911 | 0.796805781 | Rpl13   | ribosomal protein L13 [Source:RGD Symbol;Acc:621197]                                                   | 2 |
| ENSRNOG000000020618  | 843.04   | 861.94   | 824.15   | 0.96 | -0.06 | 0.536215 | 0.83315454  | Rpl13a  | ribosomal protein L13A [Source:RGD Symbol;Acc:628697]                                                  | 2 |
| ENSRNOG000000019007  | 3492.15  | 3563.61  | 3420.69  | 0.96 | -0.06 | 0.40397  | 0.72354558  | Rpl14   | ribosomal protein L14 [Source:RGD Symbol;Acc:621180]                                                   | 2 |
| ENSRNOG000000011138  | 3607.01  | 3844.75  | 3369.27  | 0.88 | -0.19 | 0.014785 | 0.074318807 | Rpl29   | ribosomal protein L29 [Source:RGD Symbol;Acc:620669]                                                   | 2 |
| ENSRNOG000000005975  | 327.31   | 349.66   | 304.97   | 0.87 | -0.20 | 0.168022 | 0.427622218 | Rpl30   | ribosomal protein L30 [Source:RGD Symbol;Acc:621201]                                                   | 2 |
| ENSRNOG000000007148  | 0.87     | 0.82     | 0.92     | 1.13 | 0.17  | 1        | 1           | Rpl32   | ribosomal protein L32 [Source:MG1 Symbol;Acc:MGI:98038]                                                | 2 |
| ENSRNOG000000034180  | 3681.36  | 3671.74  | 3690.98  | 1.01 | 0.01  | 0.965228 | 1           | Rpl37   | ribosomal protein L37 [Source:RGD Symbol;Acc:621204]                                                   | 3 |
| ENSRNOG000000043348  | 108.81   | 109.65   | 107.96   | 0.98 | -0.02 | 0.844221 | 1           | Rpl39   | ribosomal protein L39 [Source:RGD Symbol;Acc:3593]                                                     | 2 |
| ENSRNOG000000025936  | 479.37   | 505.43   | 453.32   | 0.90 | -0.16 | 0.196565 | 0.473328415 | Rpl6    | ribosomal protein L6 [Source:RGD Symbol;Acc:619826]                                                    | 2 |
| ENSRNOG000000047737  | 2.18     | 2.37     | 1.98     | 0.84 | -0.26 | 0.895145 | 1           | Rpl7a   | ribosomal protein L7a [Source:RGD Symbol;Acc:1307586]                                                  | 2 |
| ENSRNOG000000013874  | 3851.09  | 4177.00  | 3525.18  | 0.84 | -0.24 | 0.001288 | 0.010411337 | Rplp1   | ribosomal protein, large, P1 [Source:RGD Symbol;Acc:621774]                                            | 2 |
| ENSRNOG000000018812  | 78.18    | 84.92    | 71.44    | 0.84 | -0.25 | 0.267199 | 0.569334107 | Rpp25   | ribonuclease P/MRP 25 subunit [Source:RGD Symbol;Acc:1305290]                                          | 5 |
| ENSRNOG000000020595  | 5669.59  | 5739.02  | 5600.16  | 0.98 | -0.04 | 0.573917 | 0.857120757 | Rps11   | ribosomal protein S11 [Source:RGD Symbol;Acc:621026]                                                   | 2 |
| ENSRNOG000000019106  | 340.19   | 346.33   | 334.05   | 0.96 | -0.05 | 0.720658 | 0.962334572 | Rps17   | ribosomal protein S17 [Source:RGD Symbol;Acc:62027]                                                    | 2 |
| ENSRNOG000000028505  | 101.00   | 109.52   | 92.47    | 0.84 | -0.24 | 0.199503 | 0.477291158 | Rps18   | ribosomal protein S18 [Source:RGD Symbol;Acc:3595]                                                     | 1 |
| ENSRNOG000000028505  | 101.00   | 109.52   | 92.47    | 0.84 | -0.24 | 0.199503 | 0.477291158 | Rps18   | ribosomal protein S18 [Source:RGD Symbol;Acc:3595]                                                     | 2 |
| ENSRNOG000000017847  | 604.10   | 616.82   | 591.39   | 0.96 | -0.06 | 0.616386 | 0.888728982 | Rps19b1 | ribosomal protein S19 binding protein 1 [Source:RGD Symbol;Acc:1562823]                                | 2 |
| ENSRNOG000000014179  | 1021.00  | 1170.85  | 871.14   | 0.74 | -0.43 | 1.37E-05 | 0.000206982 | Rps2    | ribosomal protein S2 [Source:RGD Symbol;Acc:619887]                                                    | 2 |
| ENSRNOG000000008555  | 78.19    | 79.42    | 76.96    | 0.97 | -0.05 | 0.855177 | 1           | Rps20   | ribosomal protein S20 [Source:RGD Symbol;Acc:621037]                                                   | 2 |
| ENSRNOG000000006325  | 93.04    | 100.22   | 85.86    | 0.86 | -0.22 | 0.296928 | 0.603916395 | Rps21   | ribosomal protein S21 [Source:RGD Symbol;Acc:621038]                                                   | 2 |
| ENSRNOG000000005517  | 212.82   | 200.06   | 225.57   | 1.13 | 0.17  | 0.341609 | 0.656245913 | Rps26   | ribosomal protein S26 [Source:RGD Symbol;Acc:621044]                                                   | 2 |
| ENSRNOG000000006632  | 1409.95  | 11       |          |      |       |          |             |         |                                                                                                        |   |

|                      |          |          |          |      |       |          |             |           |                                                                                                                                                  |   |
|----------------------|----------|----------|----------|------|-------|----------|-------------|-----------|--------------------------------------------------------------------------------------------------------------------------------------------------|---|
| ENSRNOG00000004537   | 1046.25  | 1139.08  | 953.42   | 0.84 | -0.26 | 0.008047 | 0.046384145 | Rxrg      | retinoid X receptor gamma [Source:RGD Symbol;Acc:620046]                                                                                         | 3 |
| ENSRNOG000000023226  | 13852.48 | 13270.23 | 14434.74 | 1.09 | 0.12  | 0.138418 | 0.376577978 | S100a10   | S100 calcium binding protein A10 [Source:RGD Symbol;Acc:628655]                                                                                  | 1 |
| ENSRNOG000000010105  | 1529.99  | 1590.31  | 1469.67  | 0.92 | -0.11 | 0.182136 | 0.44960764  | S100a11   | S100 calcium binding protein A11 [Source:RGD Symbol;Acc:1303295]                                                                                 | 4 |
| ENSRNOG000000011748  | 45.93    | 39.60    | 52.25    | 1.32 | 0.40  | 0.147199 | 0.393041781 | S100a5    | S100 calcium binding protein A5 [Source:RGD Symbol;Acc:1308996]                                                                                  | 3 |
| ENSRNOG000000011647  | 19690.15 | 19302.20 | 20078.09 | 1.04 | 0.06  | 0.530977 | 0.829965228 | S100a6    | S100 calcium binding protein A6 [Source:RGD Symbol;Acc:620264]                                                                                   | 5 |
| ENSRNOG00000001295   | 61007.90 | 58473.98 | 63541.82 | 1.09 | 0.12  | 0.214887 | 0.499320006 | S100b     | S100 calcium binding protein B [Source:RGD Symbol;Acc:3615]                                                                                      | 1 |
| ENSRNOG000000020653  | 633.00   | 655.47   | 610.52   | 0.93 | -0.10 | 0.354247 | 0.671807341 | S1pr2     | sphingosine-1-phosphate receptor 2 [Source:RGD Symbol;Acc:68334]                                                                                 | 2 |
| ENSRNOG000000014524  | 1224.04  | 1141.46  | 1306.61  | 1.14 | 0.19  | 0.026003 | 0.114832049 | S1pr3     | sphingosine-1-phosphate receptor 3 [Source:RGD Symbol;Acc:1583843]                                                                               | 1 |
| ENSRNOG000000015128  | 4978.55  | 5043.44  | 4913.66  | 0.97 | -0.04 | 0.615982 | 0.88839016  | Sae1      | SUMO1 activating enzyme subunit 1 [Source:RGD Symbol;Acc:1306098]                                                                                | 2 |
| ENSRNOG000000049511  | 1981.96  | 2163.32  | 1800.60  | 0.83 | -0.26 | 0.002017 | 0.015211113 | Safb2     | scaffold attachment factor B2 [Source:MGI Symbol;Acc:MGI:2146808]                                                                                | 2 |
| ENSRNOG000000050035  | 13.29    | 13.33    | 13.26    | 0.99 | -0.01 | 1        | 1           | Sall4     | spalt-like transcription factor 4 [Source:RGD Symbol;Acc:1597672]                                                                                | 2 |
| ENSRNOG000000020342  | 598.37   | 600.02   | 596.73   | 0.99 | -0.01 | 0.944413 | 1           | Samd11    | sterile alpha motif domain containing 11 [Source:RGD Symbol;Acc:1310271]                                                                         | 2 |
| ENSRNOG000000043390  | 271.33   | 206.06   | 336.59   | 1.63 | 0.71  | 3.44E-06 | 6.09E-05    | Samd12    | sterile alpha motif domain containing 12 [Source:RGD Symbol;Acc:1561402]                                                                         | 2 |
| ENSRNOG00000004155   | 2288.88  | 2153.21  | 2424.54  | 1.13 | 0.17  | 0.036972 | 0.14871993  | Samd14    | sterile alpha motif domain containing 14 [Source:RGD Symbol;Acc:1306138]                                                                         | 5 |
| ENSRNOG000000030930  | 16.74    | 24.48    | 9.00     | 0.37 | -1.44 | 0.00019  | 0.002111553 | Samsn1    | SAM domain, SH3 domain and nuclear localization signals, 1 [Source:RGD Symbol;Acc:620926]                                                        | 5 |
| ENSRNOG000000042927  | 0.35     | 0.27     | 0.44     | 1.64 | 0.71  | 1        | 1           | SbK3      | SH3 domain binding kinase family, member 3 [Source:RGD Symbol;Acc:1583965]                                                                       | 2 |
| ENSRNOG000000013987  | 1380.90  | 1401.41  | 1360.39  | 0.97 | -0.04 | 0.621257 | 0.893117324 | Sbno2     | strawberry notch homolog 2 (Drosophila) [Source:RGD Symbol;Acc:1307194]                                                                          | 1 |
| ENSRNOG00000008305   | 2543.14  | 2276.79  | 2809.49  | 1.23 | 0.30  | 0.000251 | 0.002693003 | Sc5d      | sterol-C5-desaturase [Source:RGD Symbol;Acc:620775]                                                                                              | 3 |
| ENSRNOG000000019987  | 2207.75  | 2484.88  | 1930.62  | 0.78 | -0.36 | 1.55E-05 | 0.000231065 | Scand1    | SCAN domain-containing 1 [Source:RGD Symbol;Acc:1308530]                                                                                         | 1 |
| ENSRNOG000000037984  | 12.82    | 6.14     | 19.51    | 3.18 | 1.67  | 0.000115 | 0.001365507 | Scgpdh    | saccharopine dehydrogenase (putative) [Source:RGD Symbol;Acc:1311440]                                                                            | 2 |
| ENSRNOG000000015055  | 12914.97 | 11637.39 | 14192.55 | 1.22 | 0.29  | 0.000286 | 0.003001571 | Scdp2     | secretogranin II [Source:RGD Symbol;Acc:3626]                                                                                                    | 3 |
| ENSRNOG000000010784  | 9041.93  | 8450.37  | 9633.49  | 1.14 | 0.19  | 0.014472 | 0.072976038 | Scg3      | secretogranin III [Source:RGD Symbol;Acc:621209]                                                                                                 | 3 |
| ENSRNOG000000016628  | 15.86    | 14.22    | 17.50    | 1.23 | 0.30  | 0.494989 | 0.799451058 | Scgn      | secretagogin, EF-hand calcium binding protein [Source:RGD Symbol;Acc:1303281]                                                                    | 5 |
| ENSRNOG00000009276   | 2479.14  | 2386.31  | 2571.97  | 1.08 | 0.11  | 0.204253 | 0.484082404 | Schip1    | schwannomin interacting protein 1 [Source:RGD Symbol;Acc:1309962]                                                                                | 2 |
| ENSRNOG00000004498   | 4.18     | 7.48     | 0.88     | 0.12 | -3.09 | 0.000114 | 0.001351921 | Scin      | scinderin [Source:RGD Symbol;Acc:735034]                                                                                                         | 7 |
| ENSRNOG000000032473  | 15323.21 | 12515.73 | 18130.68 | 1.45 | 0.53  | 2.09E-12 | 9.43E-11    | Scn10a    | sodium channel, voltage-gated, type X, alpha subunit [Source:RGD Symbol;Acc:3629]                                                                | 5 |
| ENSRNOG000000032884  | 9495.17  | 8622.94  | 10367.40 | 1.20 | 0.27  | 0.000505 | 0.004836499 | Scn11a    | sodium channel, voltage-gated, type XI, alpha subunit [Source:RGD Symbol;Acc:3630]                                                               | 7 |
| ENSRNOG000000005989  | 1489.11  | 1069.90  | 1908.31  | 1.78 | 0.83  | 4.50E-21 | 3.83E-19    | Scn1a     | sodium channel, voltage-gated, type I, alpha subunit [Source:RGD Symbol;Acc:69364]                                                               | 1 |
| ENSRNOG000000021102  | 14467.10 | 15235.67 | 13698.53 | 0.90 | -0.15 | 0.057003 | 0.204177332 | Scn1b     | sodium channel, voltage-gated, type I, beta subunit [Source:RGD Symbol;Acc:3631]                                                                 | 1 |
| ENSRNOG000000005018  | 173.43   | 136.94   | 209.92   | 1.53 | 0.62  | 0.000349 | 0.003531441 | Scn2a1    | sodium channel, voltage-gated, type II, alpha 1 [Source:RGD Symbol;Acc:3632]                                                                     | 7 |
| ENSRNOG000000016221  | 436.41   | 391.18   | 481.65   | 1.23 | 0.30  | 0.019721 | 0.093162499 | Scn2b     | sodium channel, voltage-gated, type II, beta subunit [Source:RGD Symbol;Acc:3633]                                                                | 2 |
| ENSRNOG000000005007  | 115.16   | 89.94    | 140.37   | 1.56 | 0.64  | 0.001307 | 0.010540081 | Scn3a     | sodium channel, voltage-gated, type III, alpha [Source:RGD Symbol;Acc:3635]                                                                      | 6 |
| ENSRNOG000000006937  | 2317.78  | 1997.51  | 2638.05  | 1.32 | 0.40  | 1.37E-06 | 2.64E-05    | Scn3b     | sodium channel, voltage-gated, type III, beta subunit [Source:RGD Symbol;Acc:621657]                                                             | 5 |
| ENSRNOG000000015049  | 130.82   | 118.65   | 142.99   | 1.21 | 0.27  | 0.166811 | 0.425622988 | Scn5a     | sodium channel, voltage-gated, type V, alpha subunit [Source:RGD Symbol;Acc:3637]                                                                | 1 |
| ENSRNOG000000005309  | 2585.96  | 1927.24  | 3244.68  | 1.68 | 0.75  | 2.89E-21 | 2.50E-19    | Scn8a     | sodium channel, voltage-gated, type VIII, alpha subunit [Source:RGD Symbol;Acc:3638]                                                             | 1 |
| ENSRNOG000000006639  | 7939.93  | 6045.24  | 9834.62  | 1.63 | 0.70  | 2.61E-20 | 2.05E-18    | Scn9a     | sodium channel, voltage-gated, type IX, alpha subunit [Source:RGD Symbol;Acc:69368]                                                              | 6 |
| ENSRNOG000000006396  | 284.10   | 334.49   | 233.71   | 0.70 | -0.52 | 0.00065  | 0.005967214 | Sdc1      | syndecan 1 [Source:RGD Symbol;Acc:3648]                                                                                                          | 5 |
| ENSRNOG000000009683  | 17598.87 | 15556.98 | 19640.75 | 1.26 | 0.34  | 1.47E-05 | 0.00022131  | Sdcbp     | syndecan binding protein [Source:RGD Symbol;Acc:621497]                                                                                          | 2 |
| ENSRNOG0000000004181 | 709.56   | 682.04   | 737.08   | 1.08 | 0.11  | 0.345193 | 0.660836343 | Sdcca8    | serologically defined colon cancer antigen 8 [Source:RGD Symbol;Acc:727781]                                                                      | 2 |
| ENSRNOG000000024711  | 225.48   | 204.36   | 246.61   | 1.21 | 0.27  | 0.079976 | 0.258535346 | Sdk2      | sidekick cell adhesion molecule 2 [Source:RGD Symbol;Acc:1310397]                                                                                | 2 |
| ENSRNOG000000001391  | 204.11   | 200.77   | 207.45   | 1.03 | 0.05  | 0.781564 | 0.999777551 | Sdsl      | serine dehydratase-like [Source:RGD Symbol;Acc:1309192]                                                                                          | 2 |
| ENSRNOG000000036673  | 4.52     | 6.83     | 2.20     | 0.32 | -1.64 | 0.010962 | 0.058803637 | Sectm1b   | secreted and transmembrane 1B [Source:RGD Symbol;Acc:735132]                                                                                     | 2 |
| ENSRNOG000000036673  | 4.52     | 6.83     | 2.20     | 0.32 | -1.64 | 0.010962 | 0.058803637 | Sectm1b   | secreted and transmembrane 1B [Source:RGD Symbol;Acc:735132]                                                                                     | 3 |
| ENSRNOG000000002723  | 14.53    | 24.80    | 4.25     | 0.17 | -2.55 | 4.03E-09 | 1.26E-07    | Sele      | selectin E [Source:RGD Symbol;Acc:3654]                                                                                                          | 3 |
| ENSRNOG000000006631  | 239.19   | 216.77   | 261.61   | 1.21 | 0.27  | 0.08029  | 0.259230124 | Sema3e    | sema domain, immunoglobulin domain (Ig), short basic domain, secreted, (semaphorin) 3E [Source:RGD Symbol;Acc:1310554]                           | 2 |
| ENSRNOG000000025167  | 644.27   | 692.05   | 596.49   | 0.86 | -0.21 | 0.06907  | 0.232841271 | Sema4b    | sema domain, immunoglobulin domain (Ig), transmembrane domain (TM) and short cytoplasmic domain (semaphorin) 4D [Source:RGD Symbol;Acc:1310554]  | 2 |
| ENSRNOG000000013679  | 2406.39  | 1973.38  | 2839.40  | 1.44 | 0.52  | 4.35E-10 | 1.56E-08    | Sema4d    | sema domain, immunoglobulin domain (Ig), transmembrane domain (TM) and short cytoplasmic domain, (semaphorin) 4D [Source:RGD Symbol;Acc:1310554] | 5 |
| ENSRNOG000000017889  | 414.83   | 399.21   | 430.44   | 1.08 | 0.11  | 0.400124 | 0.748949066 | Serac1    | serine active site containing 1 [Source:RGD Symbol;Acc:1565064]                                                                                  | 2 |
| ENSRNOG000000017945  | 1383.51  | 1330.70  | 1436.33  | 1.08 | 0.11  | 0.253732 | 0.551507597 | Serf1     | small EDRK-rich factor 1 [Source:RGD Symbol;Acc:1565105]                                                                                         | 2 |
| ENSRNOG000000012989  | 646.60   | 615.15   | 678.04   | 1.10 | 0.14  | 0.197184 | 0.474075089 | Serinc2   | serine incorporator 2 [Source:RGD Symbol;Acc:1311396]                                                                                            | 5 |
| ENSRNOG000000038228  | 1121.08  | 1082.45  | 1159.72  | 1.07 | 0.10  | 0.273472 | 0.577782319 | Serp2     | stress-associated endoplasmic reticulum protein family member 2 [Source:RGD Symbol;Acc:1566076]                                                  | 2 |
| ENSRNOG0000000050761 | 0.13     | 0.00     | 0.26     | Inf  | Inf   | 1        | 1           | Serpina10 | serpin peptidase inhibitor, clade A (alpha-1 antiproteinase, antitrypsin), member 10 [Source:RGD Symbol;Acc:621220]                              | 3 |
| ENSRNOG00000001141   | 759.84   | 693.30   | 826.38   | 1.19 | 0.25  | 0.013346 | 0.068488861 | Serpina11 | serpin peptidase inhibitor, clade A (alpha-1 antiproteinase, antitrypsin), member 11 [Source:RGD Symbol;Acc:1359239]                             | 5 |
| ENSRNOG000000042634  | 0.97     | 0.77     | 1.17     | 1.53 | 0.61  | 0.821648 | 1           | Serpina12 | serpin peptidase inhibitor, clade A (alpha-1 antiproteinase, antitrypsin), member 12 [Source:RGD Symbol;Acc:621220]                              | 2 |
| ENSRNOG000000010410  | 3.04     | 5.31     | 0.77     | 0.15 | -2.78 | 0.002357 | 0.0172252   | Serpina3c | serine (or cysteine) proteinase inhibitor, clade A, member 3C [Source:RGD Symbol;Acc:2972]                                                       | 2 |
| ENSRNOG000000010527  | 35.07    | 52.52    | 17.62    | 0.34 | -1.58 | 1.68E-07 | 3.91E-06    | Serpina3n | serine (or cysteine) peptidase inhibitor, clade A, member 3N [Source:RGD Symbol;Acc:3747]                                                        | 3 |
| ENSRNOG000000002460  | 3.05     | 3.23     | 2.88     | 0.89 | -0.16 | 0.876539 | 1           | Serpin2b  | serpin peptidase inhibitor, clade B (ovalbumin), member 2 [Source:RGD Symbol;Acc:621823]                                                         | 3 |
| ENSRNOG000000002578  | 0.13     | 0.00     | 0.26     | Inf  | Inf   | 1        | 1           | Serpinp3a | serine (or cysteine) peptidase inhibitor, clade B (ovalbumin), member 3A [Source:RGD Symbol;Acc:1562868]                                         | 3 |
| ENSRNOG000000002396  | 28.96    | 20.10    | 37.82    | 1.88 | 0.91  | 0.003421 | 0.023256185 | Serpinp8  | serpin peptidase inhibitor, clade B (ovalbumin), member 8 [Source:RGD Symbol;Acc:1309833]                                                        | 3 |
| ENSRNOG000000003935  | 117.94   | 122.59   | 113.29   | 0.92 | -0.11 | 0.563411 | 0.847818888 | Sertad4   | SERTA domain containing 4 [Source:EntrezGene;Acc:360899]                                                                                         | 1 |
| ENSRNOG000000034241  | 1749.57  | 1724.35  | 1774.79  | 1.03 | 0.04  | 0.604765 | 0.908879783 | Set       | SET nuclear proto-oncogene [Source:RGD Symbol;Acc:1307467]                                                                                       | 2 |
| ENSRNOG00000001699   | 731.69   | 733.31   | 730.07   | 1.00 | -0.01 | 0.95294  | 1           | Setd4     | SET domain containing 4 [Source:RGD Symbol;Acc:619899]                                                                                           | 5 |
| ENSRNOG000000012447  | 267.89   | 276.51   | 259.28   | 0.94 | -0.09 | 0.515136 | 0.815267003 | Setd6     | SET domain containing 6 [Source:RGD Symbol;Acc:1560538]                                                                                          | 2 |
| ENSRNOG000000018412  | 2329.42  | 2551.70  | 2107.14  | 0.83 | -0.28 | 0.000939 | 0.00807851  | Sfi1      | SFI1 homolog, spindle assembly associated (yeast) [Source:RGD Symbol;Acc:1560636]                                                                | 2 |
| ENSRNOG000000031153  | 65.56    | 72.38    | 58.74    | 0.81 | -0.30 | 0.199144 | 0.476810531 | Sfn       | stratifin [Source:RGD Symbol;Acc:1304729]                                                                                                        | 2 |
| ENSRNOG000000000931  | 1606.87  | 1770.92  | 1442.81  | 0.81 | -0.30 | 0.000766 | 0.006849147 | Sfswap    | splicing factor, suppressor of white-apricot family [Source:RGD Symbol;Acc:1305004]                                                              | 2 |
| ENSRNOG000000024140  | 1518.06  | 1581.19  | 1454.94  | 0.92 | -0.12 | 0.174992 | 0.439140942 | Sft2d1    | SFT2 domain containing 1 [Source:RGD Symbol;Acc:1359119]                                                                                         | 2 |
| ENSRNOG000000016216  | 125.33   | 132.69   | 117.97   | 0.89 | -0.17 | 0.377223 | 0.69298671  | Sft2d3    | SFT2 domain containing 3 [Source:RGD Symbol;Acc:1561764]                                                                                         | 1 |
| ENSRNOG000000011438  | 6.77     | 8.73     | 4.82     | 0.55 | -0.86 | 0.111705 | 0.327100724 | Sftpa1    | surfactant protein A1 [Source:RGD Symbol;Acc:3665]                                                                                               | 3 |
| ENSRNOG000000011815  | 1665.87  | 1683.39  | 1648.35  | 0.98 | -0.03 | 0.814786 | 1           | Sgk1      | serum/glucocorticoid regulated kinase 1 [Source:RGD Symbol;Acc:3668]                                                                             | 1 |
| ENSRNOG000000013541  | 61.77    | 66.96    | 56.57    | 0.84 | -0.24 | 0.355656 | 0.672307646 | Sh2d4a    | SH2 domain containing 4A [Source:RGD Symbol;Acc:1307991]                                                                                         | 2 |
| ENSRNOG000000042623  | 10.72    | 8.13     | 13.31    | 1.64 | 0.71  | 0.113305 | 0.32919653  | Sh2d4b    | SH2 domain containing 4B [Source:RGD Symbol;Acc:1311591]                                                                                         | 2 |
| ENSRNOG000000014909  | 118.85   | 118.29   | 119.40   | 1.01 | 0.01  | 0.980357 | 1           | Sh2d5     | SH2 domain containing 5 [Source:RGD Symbol;Acc:1305952]                                                                                          | 5 |
| ENSRNOG000000015967  | 11326.96 | 11193.44 | 11460.48 | 1.02 | 0.03  | 0.665161 | 0.927009019 | Sh3bglr3  | SH3 domain binding glutamate-rich protein like 3 [Source:RGD Symbol;Acc:1308118]                                                                 | 2 |
| ENSRNOG000000012957  | 1886.46  | 1793.64  | 1979.28  | 1.10 | 0.14  | 0.120518 | 0.343593676 | Sh3glb1   | SH3-domain GRB2-like endophilin B1 [Source:RGD Symbol;Acc:1304859]                                                                               | 2 |
| ENSRNOG000000005522  | 311.87   | 315.49   | 308.25   | 0.98 | -0.03 | 0.801905 | 1           | Sh3yl1    | SH3 and SYL domain containing 1 [Source:RGD Symbol;Acc:1306440]                                                                                  | 2 |
|                      |          |          |          |      |       |          |             |           |                                                                                                                                                  |   |

|                     |          |          |          |      |       |           |             |          |                                                                                                                                   |   |
|---------------------|----------|----------|----------|------|-------|-----------|-------------|----------|-----------------------------------------------------------------------------------------------------------------------------------|---|
| ENSRNOG00000016372  | 2679.69  | 2744.06  | 2615.31  | 0.95 | -0.07 | 0.438409  | 0.757664513 | Slc12a7  | solute carrier family 12 (potassium/chloride transporter), member 7 [Source:RGD Symbol;Acc:1359672]                               | 2 |
| ENSRNOG00000016753  | 159.88   | 130.85   | 188.91   | 1.44 | 0.53  | 0.004206  | 0.027492088 | Slc14a1  | solute carrier family 14 (urea transporter), member 1 [Source:RGD Symbol;Acc:3688]                                                | 2 |
| ENSRNOG00000002305  | 380.78   | 330.88   | 430.68   | 1.30 | 0.38  | 0.005785  | 0.03556014  | Slc15a2  | solute carrier family 15 (oligopeptide transporter), member 2 [Source:RGD Symbol;Acc:61972]                                       | 1 |
| ENSRNOG00000000962  | 1199.40  | 1112.65  | 1286.16  | 1.16 | 0.21  | 0.034338  | 0.140650991 | Slc15a4  | solute carrier family 15 (oligopeptide transporter), member 4 [Source:RGD Symbol;Acc:708469]                                      | 2 |
| ENSRNOG00000000588  | 36.82    | 40.69    | 32.96    | 0.81 | -0.30 | 0.287065  | 0.59346193  | Slc16a10 | solute carrier family 16 (aromatic amino acid transporter), member 10 [Source:RGD Symbol;Acc:69197]                               | 2 |
| ENSRNOG00000021916  | 148.15   | 133.52   | 162.78   | 1.22 | 0.29  | 0.120437  | 0.343559324 | Slc16a12 | solute carrier family 16, member 12 [Source:RGD Symbol;Acc:1311468]                                                               | 5 |
| ENSRNOG00000016147  | 4475.26  | 3822.48  | 5128.04  | 1.34 | 0.42  | 5.87E-08  | 1.46E-06    | Slc17a6  | solute carrier family 17 (vesicular glutamate transporter), member 6 [Source:RGD Symbol;Acc:620531]                               | 1 |
| ENSRNOG00000020650  | 11079.18 | 11201.44 | 10956.92 | 0.98 | -0.03 | 0.754701  | 0.983896651 | Slc17a7  | solute carrier family 17 (vesicular glutamate transporter), member 7 [Source:RGD Symbol;Acc:620101]                               | 1 |
| ENSRNOG00000007581  | 38.00    | 34.77    | 41.23    | 1.19 | 0.25  | 0.358418  | 0.674001708 | Slc17a8  | solute carrier family 17 (vesicular glutamate transporter), member 8 [Source:RGD Symbol;Acc:628870]                               | 7 |
| ENSRNOG00000000890  | 534.20   | 457.66   | 610.74   | 1.33 | 0.42  | 0.000623  | 0.005751801 | Slc18a2  | solute carrier family 18 (vesicular monoamine transporter), member 2 [Source:RGD Symbol;Acc:3694]                                 | 1 |
| ENSRNOG00000016163  | 758.65   | 584.10   | 933.20   | 1.60 | 0.68  | 3.03E-10  | 1.12E-08    | Slc1a3   | solute carrier family 1 (glial high affinity glutamate transporter), member 3 [Source:RGD Symbol;Acc:3698]                        | 1 |
| ENSRNOG00000020562  | 91.53    | 126.15   | 56.92    | 0.45 | -1.15 | 9.79E-08  | 2.35E-06    | Slc22a18 | solute carrier family 22, member 18 [Source:RGD Symbol;Acc:1303323]                                                               | 2 |
| ENSRNOG000000046195 | 34.81    | 34.26    | 35.35    | 1.03 | 0.05  | 0.866363  |             | Slc22a4  | solute carrier family 22 (organic cation/zwitterion transporter), member 4 [Source:RGD Symbol;Acc:6211]                           | 2 |
| ENSRNOG000000006729 | 9.38     | 6.85     | 11.90    | 1.74 | 0.80  | 0.116083  | 0.335250708 | Slc24a4  | solute carrier family 24 (sodium/potassium/calcium exchanger), member 4 [Source:RGD Symbol;Acc:1305926]                           | 5 |
| ENSRNOG000000038001 | 4638.40  | 5023.01  | 4253.80  | 0.85 | -0.24 | 0.001817  | 0.013948958 | Slc25a1  | solute carrier family 25 (mitochondrial carrier, citrate transporter), member 1 [Source:RGD Symbol;Acc:3]                         | 2 |
| ENSRNOG000000020470 | 847.14   | 832.37   | 861.92   | 1.04 | 0.05  | 0.676465  | 0.934155728 | Slc25a24 | solute carrier family 25 (mitochondrial carrier, phosphate carrier), member 24 [Source:RGD Symbol;Acc:2]                          | 2 |
| ENSRNOG000000010592 | 1067.48  | 965.98   | 1168.98  | 1.21 | 0.28  | 0.004993  | 0.031598646 | Slc25a27 | solute carrier family 25, member 27 [Source:RGD Symbol;Acc:620787]                                                                | 2 |
| ENSRNOG00000015495  | 238.69   | 263.33   | 214.06   | 0.81 | -0.30 | 0.059469  | 0.210260243 | Slc25a37 | solute carrier family 25 (mitochondrial iron transporter), member 37 [Source:RGD Symbol;Acc:1359361]                              | 2 |
| ENSRNOG00000018552  | 1732.20  | 1811.51  | 1652.90  | 0.91 | -0.13 | 0.118174  | 0.33900784  | Slc25a38 | solute carrier family 25, member 38 [Source:RGD Symbol;Acc:1311914]                                                               | 2 |
| ENSRNOG000000019752 | 529.67   | 575.93   | 483.41   | 0.84 | -0.25 | 0.037343  | 0.149785016 | Slc29a1  | solute carrier family 29 (equilibrative nucleoside transporter), member 1 [Source:RGD Symbol;Acc:61899]                           | 6 |
| ENSRNOG00000015393  | 0.85     | 1.48     | 0.22     | 0.15 | -2.78 | 0.127429  | 0.354543154 | Slc32a1  | solute carrier family 32 (GABA vesicular transporter), member 1 [Source:RGD Symbol;Acc:621402]                                    | 1 |
| ENSRNOG00000004626  | 150.08   | 148.08   | 152.08   | 1.03 | 0.04  | 0.804458  |             | Slc34a2  | solute carrier family 34 (type II sodium/phosphate cotransporter), member 2 [Source:RGD Symbol;Acc:620889]                        | 3 |
| ENSRNOG00000016174  | 394.39   | 400.39   | 388.40   | 0.97 | -0.04 | 0.758526  | 0.98613107  | Slc35b3  | solute carrier family 35 (adenosine 3'-phospho 5'-phosphosulfate transporter), member B3 [Source:RGD Symbol;Acc:3698]             | 2 |
| ENSRNOG000000014982 | 72.27    | 59.31    | 85.23    | 1.44 | 0.52  | 0.021432  | 0.099109903 | Slc35f4  | solute carrier family 35, member F4 [Source:RGD Symbol;Acc:1361109]                                                               | 5 |
| ENSRNOG00000003403  | 1249.57  | 1237.77  | 1261.37  | 1.02 | 0.03  | 0.818106  |             | Slc35f5  | solute carrier family 35, member F5 [Source:RGD Symbol;Acc:1308125]                                                               | 2 |
| ENSRNOG00000001169  | 808.46   | 776.34   | 840.57   | 1.08 | 0.11  | 0.26625   | 0.567657793 | Slc37a1  | solute carrier family 37 (glucose-6-phosphate transporter), member 1 [Source:RGD Symbol;Acc:1308587]                              | 5 |
| ENSRNOG00000027767  | 24.35    | 27.27    | 21.43    | 0.79 | -0.35 | 0.355266  | 0.672307646 | Slc38a5  | solute carrier family 38, member 5 [Source:RGD Symbol;Acc:620702]                                                                 | 2 |
| ENSRNOG00000002622  | 146.43   | 153.38   | 139.49   | 0.91 | -0.14 | 0.426554  | 0.746753009 | Slc38a6  | solute carrier family 38, member 6 [Source:RGD Symbol;Acc:1310330]                                                                | 2 |
| ENSRNOG00000025503  | 3.77     | 4.62     | 2.92     | 0.63 | -0.66 | 0.355572  | 0.672307646 | Slc38a8  | solute carrier family 38, member 8 [Source:RGD Symbol;Acc:1560237]                                                                | 2 |
| ENSRNOG000000000465 | 4582.05  | 4947.35  | 4216.74  | 0.85 | -0.23 | 0.00271   | 0.019318504 | Slc39a7  | solute carrier family 39 (zinc transporter), member 7 [Source:RGD Symbol;Acc:1593280]                                             | 1 |
| ENSRNOG000000008243 | 81.46    | 116.46   | 46.46    | 0.40 | -1.33 | 0.41E-09  | 1.42E-07    | Slc39a1  | solute carrier family 43 (amino acid system L transporter), member 1 [Source:RGD Symbol;Acc:1308229]                              | 2 |
| ENSRNOG000000008078 | 19.76    | 19.48    | 20.05    | 1.03 | 0.04  | 0.981063  |             | Slc44a4  | solute carrier family 44, member 4 [Source:RGD Symbol;Acc:1303167]                                                                | 1 |
| ENSRNOG000000007591 | 109.14   | 87.06    | 131.22   | 1.51 | 0.59  | 0.004046  | 0.026657426 | Slc45a3  | solute carrier family 45, member 3 [Source:RGD Symbol;Acc:1309764]                                                                | 5 |
| ENSRNOG000000038055 | 175.79   | 184.95   | 166.63   | 0.90 | -0.15 | 0.358273  | 0.674249981 | Slc47a2  | solute carrier family 47 (multidrug and toxin extrusion), member 2 [Source:RGD Symbol;Acc:1562382]                                | 5 |
| ENSRNOG000000020951 | 260.50   | 509.96   | 11.05    | 0.02 | -5.53 | 8.28E-142 | 8.29E-139   | Slc4a1   | solute carrier family 4 (anion exchanger), member 1 [Source:RGD Symbol;Acc:3710]                                                  | 2 |
| ENSRNOG000000021234 | 466.46   | 468.15   | 464.78   | 0.99 | -0.01 | 0.951608  |             | Slc4a11  | solute carrier family 4, sodium borate transporter, member 11 [Source:RGD Symbol;Acc:1310188]                                     | 5 |
| ENSRNOG000000020138 | 1646.83  | 1684.95  | 1608.72  | 0.95 | -0.07 | 0.473646  | 0.780237584 | Slc4a3   | solute carrier family 4 (anion exchanger), member 3 [Source:RGD Symbol;Acc:3712]                                                  | 2 |
| ENSRNOG000000001765 | 378.52   | 372.48   | 384.55   | 1.03 | 0.05  | 0.739762  | 0.975246344 | Slc51a   | solute carrier family 51, alpha subunit [Source:RGD Symbol;Acc:1311100]                                                           | 2 |
| ENSRNOG000000005132 | 66.98    | 83.29    | 50.67    | 0.61 | -0.72 | 0.00293   | 0.020525018 | Slc52a3  | solute carrier family 52, riboflavin transporter, member 3 [Source:RGD Symbol;Acc:1304644]                                        | 2 |
| ENSRNOG000000013407 | 65.39    | 40.13    | 90.64    | 2.26 | 1.18  | 1.76E-06  | 3.28E-05    | Slc5a11  | solute carrier family 5 (sodium/inositol cotransporter), member 11 [Source:RGD Symbol;Acc:621410]                                 | 2 |
| ENSRNOG00000010597  | 67.50    | 71.46    | 63.54    | 0.89 | -0.17 | 0.441135  | 0.760251603 | Slc5a7   | solute carrier family 5 (sodium/choline cotransporter), member 7 [Source:RGD Symbol;Acc:69270]                                    | 3 |
| ENSRNOG000000006527 | 731.97   | 619.58   | 844.35   | 1.36 | 0.45  | 3.45E-05  | 0.000475562 | Slc6a1   | solute carrier family 6 (neurotransmitter transporter), member 1 [Source:RGD Symbol;Acc:620533]                                   | 1 |
| ENSRNOG000000005697 | 71.17    | 61.28    | 81.07    | 1.32 | 0.40  | 0.070367  | 0.236266308 | Slc6a11  | solute carrier family 6 (neurotransmitter transporter), member 11 [Source:RGD Symbol;Acc:628737]                                  | 1 |
| ENSRNOG000000012876 | 373.01   | 315.53   | 430.49   | 1.36 | 0.45  | 0.000402  | 0.003988076 | Slc6a13  | solute carrier family 6 (neurotransmitter transporter), member 13 [Source:RGD Symbol;Acc:620788]                                  | 2 |
| ENSRNOG00000016311  | 37.30    | 71.02    | 3.57     | 0.05 | -4.32 | 6.78E-30  | 8.49E-28    | Slc6a2   | solute carrier family 6 (neurotransmitter transporter), member 2 [Source:RGD Symbol;Acc:621822]                                   | 1 |
| ENSRNOG00000017302  | 2.98     | 3.09     | 2.87     | 0.93 | -0.11 | 1         |             | Slc6a3   | solute carrier family 6 (neurotransmitter transporter), member 3 [Source:RGD Symbol;Acc:3715]                                     | 1 |
| ENSRNOG000000003476 | 26.19    | 39.48    | 12.90    | 0.33 | -1.61 | 1.72E-06  | 3.22E-05    | Slc6a4   | solute carrier family 6 (neurotransmitter transporter), member 4 [Source:RGD Symbol;Acc:3714]                                     | 1 |
| ENSRNOG000000018644 | 377.68   | 340.85   | 414.51   | 1.22 | 0.28  | 0.03792   | 0.151463841 | Slc6a7   | solute carrier family 6 (neurotransmitter transporter), member 7 [Source:RGD Symbol;Acc:620928]                                   | 3 |
| ENSRNOG00000019484  | 311.52   | 120.37   | 502.67   | 4.18 | 2.06  | 3.11E-40  | 5.64E-38    | Slc6a9   | solute carrier family 6 (neurotransmitter transporter, glycine), member 9 [Source:RGD Symbol;Acc:62124]                           | 2 |
| ENSRNOG000000004133 | 20.70    | 25.89    | 15.50    | 0.60 | -0.74 | 0.031519  | 0.131964884 | Slc7a3   | solute carrier family 7 (cationic amino acid transporter, y <sup>+</sup> system), member 3 [Source:RGD Symbol;Acc:68342]          | 3 |
| ENSRNOG00000020049  | 811.55   | 800.60   | 822.50   | 1.03 | 0.04  | 0.733787  | 0.971608591 | Slc7a6os | solute carrier family 7, member 6 opposite strand [Source:RGD Symbol;Acc:708394]                                                  | 2 |
| ENSRNOG00000010296  | 2733.98  | 2648.80  | 2819.15  | 1.06 | 0.09  | 0.278135  | 0.583538161 | Slc7a7   | solute carrier family 7 (amino acid transporter light chain, y <sup>+</sup> L system), member 7 [Source:RGD Symbol;Acc:619902]    | 5 |
| ENSRNOG000000008479 | 189.21   | 169.28   | 209.14   | 1.24 | 0.31  | 0.071217  | 0.238282749 | Slc8a1   | solute carrier family 8 (sodium/calcium exchanger), member 1 [Source:RGD Symbol;Acc:3717]                                         | 2 |
| ENSRNOG000000002997 | 3914.77  | 4288.96  | 3540.57  | 0.83 | -0.28 | 0.000385  | 0.003842291 | Slc9a3r2 | solute carrier family 9, subfamily A (NHE3, cation proton antiporter 3), member 3 regulator 2 [Source:RGD Symbol;Acc:620788]      | 2 |
| ENSRNOG000000023404 | 139.16   | 141.59   | 136.73   | 0.97 | -0.05 | 0.79514   |             | Slc9b2   | solute carrier family 9, subfamily B (NHA2, cation proton antiporter 2), member 2 [Source:RGD Symbol;Acc:1359139]                 | 2 |
| ENSRNOG000000021412 | 401.30   | 430.88   | 371.71   | 0.86 | -0.21 | 0.102349  | 0.307370131 | Sifn13   | slit homolog 1 (Drosophila) [Source:RGD Symbol;Acc:69307]                                                                         | 2 |
| ENSRNOG000000026065 | 2924.74  | 2690.49  | 3158.99  | 1.17 | 0.23  | 0.002849  | 0.020076761 | Slit1    | SMAD family member 1 [Source:RGD Symbol;Acc:3030]                                                                                 | 2 |
| ENSRNOG00000018483  | 1240.47  | 1218.42  | 1262.52  | 1.04 | 0.05  | 0.582518  | 0.864564617 | Smad1    | SWI/SNF related, matrix associated, actin dependent regulator of chromatin, subfamily a, member 1 [Source:RGD Symbol;Acc:1561046] | 5 |
| ENSRNOG000000003762 | 493.78   | 450.63   | 536.92   | 1.19 | 0.25  | 0.050753  | 0.187049519 | Smarca1  | structural maintenance of chromosomes 2 [Source:RGD Symbol;Acc:1305227]                                                           | 2 |
| ENSRNOG000000022325 | 374.61   | 356.03   | 393.18   | 1.10 | 0.14  | 0.327414  | 0.639970781 | Smc2     | structural maintenance of chromosomes 4 [Source:RGD Symbol;Acc:1306680]                                                           | 2 |
| ENSRNOG000000010274 | 844.51   | 806.81   | 882.20   | 1.09 | 0.13  | 0.233719  | 0.525952068 | Smc4     | small integral membrane protein 5 [Source:RGD Symbol;Acc:1586374]                                                                 | 2 |
| ENSRNOG000000049642 | 328.94   | 339.86   | 318.01   | 0.94 | -0.10 | 0.482467  | 0.787271524 | Smm5     | sphingomyelin phosphodiesterase 4, neutral membrane [Source:RGD Symbol;Acc:13110674]                                              | 2 |
| ENSRNOG000000001875 | 1369.68  | 1380.55  | 1358.82  | 0.98 | -0.02 | 0.854208  |             | Smpd4    | SET and MYND domain containing 1 [Source:RGD Symbol;Acc:1305105]                                                                  | 5 |
| ENSRNOG000000006776 | 1.56     | 1.81     | 1.31     | 0.72 | -0.47 | 0.709777  | 0.955185851 | Smyd1    | SET and MYND domain containing 3 [Source:MGI Symbol;Acc:MGI:1916976]                                                              | 5 |
| ENSRNOG000000028924 | 411.37   | 395.91   | 426.82   | 1.08 | 0.11  | 0.441192  | 0.760287146 | Smyd3    | synuclein, gamma [Source:RGD Symbol;Acc:70996]                                                                                    | 5 |
| ENSRNOG000000010437 | 90255.51 | 88224.92 | 92286.11 | 1.05 | 0.06  | 0.533357  | 0.832447198 | Sncg     | sushi, nidogen and EGF-like domains 1 [Source:RGD Symbol;Acc:1566079]                                                             | 2 |
| ENSRNOG000000023548 | 382.51   | 375.54   | 389.48   | 1.04 | 0.05  | 0.58883   | 0.866834201 | Sned1    | small nucleolar RNA host gene 11 (non-protein coding) [Source:RGD Symbol;Acc:1563912]                                             | 2 |
| ENSRNOG000000036802 | 5794.93  | 5690.36  | 5899.49  | 1.04 | 0.05  | 0.512334  | 0.813076113 | Snhg11   | small nuclear ribonucleoprotein 70 (U1) [Source:RGD Symbol;Acc:1307120]                                                           | 2 |
| ENSRNOG000000020763 | 8744.66  | 10237.44 | 7215.89  | 0.71 | -0.50 | 4.26E-11  | 1.71E-09    | Snrnp70  | small nuclear ribonucleoprotein polypeptide F [Source:RGD Symbol;Acc:1588229]                                                     | 2 |
| ENSRNOG000000005556 | 320.84   | 318.16   | 323.52   | 1.02 | 0.02  | 0.907881  |             | Snrpf    | sorting nexin 10 [Source:RGD Symbol;Acc:1305782]                                                                                  | 2 |
| ENSRNOG000000011944 | 2660.56  | 2380.27  | 2940.86  | 1.24 | 0.31  | 0.000217  | 0.00237405  | Snx10    | sorting nexin 11 [Source:RGD Symbol;Acc:1307319]                                                                                  | 2 |
| ENSRNOG000000008642 | 1955.54  | 2052.43  | 1858.65  | 0.91 | -0.14 | 0.085988  | 0.272769239 | Snx11    | sorting nexin 15 [Source:RGD Symbol;Acc:1305803]                                                                                  | 2 |
| ENSRNOG000000021007 | 731.20   | 749.35   | 713.04   | 0.95 | -0.07 | 0.49824   | 0.802326828 | Snx15    | sorting nexin family member 21 [Source:RGD Symbol;Acc:2323753]                                                                    | 2 |
| ENSRNOG000000015181 | 1339.29  | 1395.74  | 1282.03  | 0.92 | -0.12 | 0.199816  | 0.477768086 | Snx21    | sorting nexin 7 [Source:RGD Symbol;Acc:1305480]                                                                                   | 2 |
| ENSRNO              |          |          |          |      |       |           |             |          |                                                                                                                                   |   |

|                      |          |           |          |      |       |          |             |            |                                                                                                                                               |   |
|----------------------|----------|-----------|----------|------|-------|----------|-------------|------------|-----------------------------------------------------------------------------------------------------------------------------------------------|---|
| ENSRNOG00000004246   | 1766.96  | 1815.09   | 1718.83  | 0.95 | -0.08 | 0.348594 | 0.664985164 | Spag7      | sperm associated antigen 7 [Source:RGD Symbol;Acc:1305473]                                                                                    | 2 |
| ENSRNOG00000012840   | 91760.16 | 107114.03 | 76406.29 | 0.71 | -0.49 | 1.48E-06 | 2.81E-05    | Sparc      | secreted protein, acidic, cysteine-rich (osteonectin) [Source:RGD Symbol;Acc:3742]                                                            | 1 |
| ENSRNOG000000029862  | 110.92   | 128.92    | 92.92    | 0.72 | -0.47 | 0.019435 | 0.092020392 | Spc24      | SPC24, NDC80 kinetochore complex component [Source:RGD Symbol;Acc:1307631]                                                                    | 2 |
| ENSRNOG000000006731  | 69.78    | 78.71     | 60.86    | 0.77 | -0.37 | 0.101165 | 0.305202759 | Spc25      | SPC25, NDC80 kinetochore complex component [Source:RGD Symbol;Acc:1307811]                                                                    | 2 |
| ENSRNOG000000039024  | 203.43   | 204.09    | 202.78   | 0.99 | -0.01 | 0.93368  | 1           | Spice1     | spindle and centriole associated protein 1 [Source:RGD Symbol;Acc:1310729]                                                                    | 2 |
| ENSRNOG000000038793  | 0.11     | 0.00      | 0.22     | Inf  | Inf   | 1        | 1           | Spink13    | serine peptidase inhibitor, Kazal type 13 (putative) [Source:RGD Symbol;Acc:1591057]                                                          | 2 |
| ENSRNOG000000036711  | 23.35    | 38.11     | 8.58     | 0.23 | -2.15 | 3.05E-09 | 9.82E-08    | Spn        | sialophorin [Source:RGD Symbol;Acc:3750]                                                                                                      | 2 |
| ENSRNOG000000043451  | 25033.32 | 24584.08  | 25482.56 | 1.04 | 0.05  | 0.519128 | 0.819425187 | Spp1       | secreted phosphoprotein 1 [Source:RGD Symbol;Acc:3752]                                                                                        | 1 |
| ENSRNOG000000018927  | 302.65   | 263.18    | 342.12   | 1.30 | 0.38  | 0.009296 | 0.052031636 | Sprrn      | shadow of prion protein homolog (zebrafish) [Source:RGD Symbol;Acc:1561845]                                                                   | 3 |
| ENSRNOG000000024028  | 0.53     | 0.27      | 0.80     | 2.99 | 1.58  | 0.692766 | 0.943449877 | Sprr1a     | small proline-rich protein 1A [Source:RGD Symbol;Acc:1593163]                                                                                 | 2 |
| ENSRNOG00000003537   | 75.63    | 116.68    | 34.59    | 0.30 | -1.75 | 1.25E-13 | 6.49E-12    | Spta1      | spectrin, alpha, erythrocytic 1 [Source:RGD Symbol;Acc:1305194]                                                                               | 2 |
| ENSRNOG000000010882  | 1911.48  | 1901.65   | 1921.31  | 1.01 | 0.01  | 0.88684  | 1           | Sptcl1     | serine palmitoyltransferase, long chain base subunit 1 [Source:RGD Symbol;Acc:1307140]                                                        | 1 |
| ENSRNOG000000017601  | 1170.50  | 1176.35   | 1164.66  | 0.99 | -0.01 | 0.908951 | 1           | Srd5a1     | steroid-5-alpha-reductase, alpha polypeptide 1 (3-oxo-5-alpha-steroid delta 4-dehydrogenase alpha 1) [Source:RGD Symbol;Acc:3757]             | 1 |
| ENSRNOG000000032735  | 766.10   | 760.95    | 771.24   | 1.01 | 0.02  | 0.840316 | 1           | Srek1      | splicing regulatory glutamine/lysine-rich protein 1 [Source:RGD Symbol;Acc:621696]                                                            | 2 |
| ENSRNOG000000049780  | 1998.47  | 1824.20   | 2172.75  | 1.19 | 0.25  | 0.003242 | 0.022244644 | Sri        | scorin [Source:RGD Symbol;Acc:1584485]                                                                                                        | 2 |
| ENSRNOG000000013003  | 15.45    | 18.20     | 12.69    | 0.70 | -0.52 | 0.204898 | 0.485337369 | Srms       | src-related kinase lacking C-terminal regulatory tyrosine and N-terminal myristylation sites [Source:RGD Symbol;Acc:1306602]                  | 3 |
| ENSRNOG000000002991  | 134.66   | 127.34    | 141.98   | 1.11 | 0.16  | 0.386074 | 0.702691787 | Srr        | serine racemase [Source:RGD Symbol;Acc:735094]                                                                                                | 1 |
| ENSRNOG0000000048277 | 2492.34  | 2761.38   | 2223.31  | 0.81 | -0.31 | 0.00012  | 0.00141348  | Srrt       | serrate RNA effector molecule homolog (Arabidopsis) [Source:MGI Symbol;Acc:MGI:1933527]                                                       | 2 |
| ENSRNOG000000029592  | 2726.61  | 2787.87   | 2665.35  | 0.96 | -0.06 | 0.434251 | 0.753054913 | Srsf11     | serine/arginine-rich splicing factor 11 [Source:RGD Symbol;Acc:1559953]                                                                       | 2 |
| ENSRNOG000000010007  | 1630.48  | 1774.04   | 1486.93  | 0.84 | -0.25 | 0.004011 | 0.026464432 | Srsf4      | serine/arginine-rich splicing factor 4 [Source:RGD Symbol;Acc:1561347]                                                                        | 2 |
| ENSRNOG000000005513  | 6003.78  | 6462.93   | 5544.64  | 0.86 | -0.22 | 0.002795 | 0.019786163 | Srsf5      | serine/arginine-rich splicing factor 5 [Source:RGD Symbol;Acc:3664]                                                                           | 2 |
| ENSRNOG000000011663  | 521.94   | 600.08    | 443.80   | 0.74 | -0.44 | 0.000336 | 0.003425462 | Srsf9      | serine/arginine-rich splicing factor 9 [Source:RGD Symbol;Acc:1309495]                                                                        | 2 |
| ENSRNOG000000007920  | 2654.77  | 2591.99   | 2717.55  | 1.05 | 0.07  | 0.395007 | 0.713264723 | Ssbp3      | single stranded DNA binding protein 3 [Source:RGD Symbol;Acc:621502]                                                                          | 2 |
| ENSRNOG000000018878  | 1205.24  | 1138.18   | 1272.29  | 1.12 | 0.16  | 0.079623 | 0.257830565 | Ssh3       | slingshot protein phosphatase 3 [Source:RGD Symbol;Acc:1308679]                                                                               | 2 |
| ENSRNOG000000011093  | 1062.66  | 1067.86   | 1057.46  | 0.99 | -0.01 | 0.869781 | 1           | Ssna1      | Sjogren syndrome nuclear autoantigen 1 [Source:RGD Symbol;Acc:1310259]                                                                        | 2 |
| ENSRNOG000000001837  | 681.05   | 742.45    | 619.66   | 0.83 | -0.26 | 0.016965 | 0.08292095  | Sst        | somatostatin [Source:RGD Symbol;Acc:3761]                                                                                                     | 5 |
| ENSRNOG000000002793  | 223.39   | 200.53    | 246.24   | 1.23 | 0.30  | 0.064301 | 0.221524936 | Sstr2      | somatostatin receptor 2 [Source:RGD Symbol;Acc:3763]                                                                                          | 3 |
| ENSRNOG0000000004641 | 6.38     | 8.83      | 3.93     | 0.45 | -1.17 | 0.034552 | 0.141313932 | Sstr4      | somatostatin receptor 4 [Source:RGD Symbol;Acc:3764]                                                                                          | 1 |
| ENSRNOG000000006200  | 15.34    | 3.34      | 27.34    | 8.19 | 3.03  | 6.67E-11 | 2.64E-09    | St18       | suppression of tumorigenicity 18 [Source:RGD Symbol;Acc:708566]                                                                               | 3 |
| ENSRNOG000000046515  | 11.81    | 7.61      | 16.01    | 2.10 | 1.07  | 0.011891 | 0.062663224 | St6gal2    | ST6 beta-galactosamide alpha-2,6-sialyltransferase 2 [Source:RGD Symbol;Acc:1559663]                                                          | 5 |
| ENSRNOG000000042422  | 179.11   | 147.90    | 210.32   | 1.42 | 0.51  | 0.003429 | 0.023309061 | St6galnac3 | ST6 (alpha-N-acetyl-neuraminyl-2,3-beta-galactosyl-1,3)-N-acetylgalactosaminide alpha-2,6-sialyltransferase 3 [Source:RGD Symbol;Acc:3677]    | 5 |
| ENSRNOG000000049676  | 83.61    | 75.46     | 91.76    | 1.22 | 0.28  | 0.174689 | 0.438432064 | St6galnac5 | ST6 (alpha-N-acetyl-neuraminyl-2,3-beta-galactosyl-1,3)-N-acetylgalactosaminide alpha-2,6-sialyltransferase 5 [Source:RGD Symbol;Acc:1564252] | 5 |
| ENSRNOG000000014018  | 232.75   | 210.25    | 255.25   | 1.21 | 0.28  | 0.079581 | 0.257774967 | St8sia1    | ST8 alpha-N-acetyl-neuraminide alpha-2,8-sialyltransferase 1 [Source:RGD Symbol;Acc:3679]                                                     | 1 |
| ENSRNOG000000008865  | 1323.27  | 1194.55   | 1451.98  | 1.22 | 0.28  | 0.002377 | 0.017360935 | Stac       | SH3 and cysteine rich domain [Source:RGD Symbol;Acc:1305745]                                                                                  | 5 |
| ENSRNOG000000001090  | 1157.84  | 1192.52   | 1123.17  | 0.94 | -0.09 | 0.358839 | 0.674249981 | Stard13    | STAR-related lipid transfer (START) domain containing 13 [Source:RGD Symbol;Acc:1564816]                                                      | 1 |
| ENSRNOG000000031081  | 2632.12  | 2516.02   | 2748.21  | 1.09 | 0.13  | 0.111519 | 0.32688631  | Stat2      | signal transducer and activator of transcription 2 [Source:RGD Symbol;Acc:1311649]                                                            | 2 |
| ENSRNOG000000025023  | 2089.32  | 2151.77   | 2026.87  | 0.94 | -0.09 | 0.309157 | 0.618607898 | Stat6      | signal transducer and activator of transcription 6, interleukin-4 induced [Source:RGD Symbol;Acc:130906]                                      | 2 |
| ENSRNOG000000007781  | 2543.57  | 2431.50   | 2655.65  | 1.09 | 0.13  | 0.120651 | 0.343814897 | Stau1      | staufen double-stranded RNA binding protein 1 [Source:RGD Symbol;Acc:621778]                                                                  | 1 |
| ENSRNOG000000042458  | 1853.96  | 1625.48   | 2082.45  | 1.28 | 0.36  | 3.32E-05 | 0.000459716 | Stau2      | staufen double-stranded RNA binding protein 2 [Source:RGD Symbol;Acc:621479]                                                                  | 1 |
| ENSRNOG0000000020107 | 906.42   | 905.02    | 907.82   | 1.00 | 0.00  | 0.983971 | 1           | Stk11      | serine/threonine kinase 11 interacting protein [Source:RGD Symbol;Acc:1305046]                                                                | 2 |
| ENSRNOG000000048929  | 295.09   | 306.18    | 284.00   | 0.93 | -0.11 | 0.435064 | 0.753819152 | Stk19      | Protein Stk19 [Source:UniProtKB/TrEMBL;Acc:M0R5H8]                                                                                            | 2 |
| ENSRNOG000000027066  | 52.30    | 42.32     | 62.29    | 1.47 | 0.56  | 0.036719 | 0.147874835 | Stk32a     | serine/threonine kinase 32A [Source:RGD Symbol;Acc:1308338]                                                                                   | 5 |
| ENSRNOG000000000519  | 1080.64  | 1189.46   | 971.82   | 0.82 | -0.29 | 0.002549 | 0.018397562 | Stk38      | serine/threonine kinase 38 [Source:RGD Symbol;Acc:1309455]                                                                                    | 2 |
| ENSRNOG000000024808  | 7231.61  | 6896.34   | 7566.89  | 1.10 | 0.13  | 0.085352 | 0.271370839 | Stk39      | serine threonine kinase 39 [Source:RGD Symbol;Acc:621643]                                                                                     | 1 |
| ENSRNOG000000016810  | 5490.79  | 5415.58   | 5566.00  | 1.03 | 0.04  | 0.642256 | 0.909162966 | Stmn1      | stathmin 1 [Source:RGD Symbol;Acc:2992]                                                                                                       | 5 |
| ENSRNOG000000019147  | 682.76   | 796.23    | 569.29   | 0.71 | -0.48 | 5.79E-06 | 9.51E-05    | Stom       | stomatin [Source:RGD Symbol;Acc:1305109]                                                                                                      | 2 |
| ENSRNOG000000011006  | 57.55    | 54.04     | 61.05    | 1.13 | 0.18  | 0.445558 | 0.763437784 | Stoml3     | stomatin (Epb7.2)-like 3 [Source:RGD Symbol;Acc:1311090]                                                                                      | 1 |
| ENSRNOG000000004458  | 52.99    | 50.26     | 55.72    | 1.11 | 0.15  | 0.51628  | 0.816443384 | Ston2      | stonin 2 [Source:RGD Symbol;Acc:1311502]                                                                                                      | 2 |
| ENSRNOG000000011922  | 1747.97  | 1742.83   | 1753.12  | 1.01 | 0.01  | 0.961782 | 1           | Stt3b      | STT3B, subunit of the oligosaccharyltransferase complex (catalytic) [Source:RGD Symbol;Acc:1311563]                                           | 7 |
| ENSRNOG0000000209165 | 1183.99  | 1173.35   | 1194.62  | 1.02 | 0.03  | 0.808944 | 1           | Stx1a      | syntaxin 1A (brain) [Source:RGD Symbol;Acc:69430]                                                                                             | 2 |
| ENSRNOG00000000936   | 1169.89  | 1140.45   | 1199.32  | 1.05 | 0.07  | 0.459387 | 0.775315279 | Stx2       | syntaxin 2 [Source:RGD Symbol;Acc:2558]                                                                                                       | 5 |
| ENSRNOG000000021013  | 416.10   | 404.01    | 428.18   | 1.06 | 0.08  | 0.563643 | 0.847855006 | Stx3       | syntaxin 3 [Source:RGD Symbol;Acc:621005]                                                                                                     | 2 |
| ENSRNOG000000019302  | 1609.85  | 1700.80   | 1519.90  | 0.89 | -0.16 | 0.059327 | 0.209854441 | Stx4       | syntaxin 4 [Source:RGD Symbol;Acc:621019]                                                                                                     | 2 |
| ENSRNOG000000009994  | 160.28   | 201.73    | 118.83   | 0.59 | -0.76 | 2.28E-05 | 0.000328115 | Stxbp2     | syntaxin binding protein 2 [Source:RGD Symbol;Acc:619967]                                                                                     | 2 |
| ENSRNOG000000013100  | 1357.69  | 1372.54   | 1342.83  | 0.98 | -0.03 | 0.70274  | 0.951071494 | Supt20     | suppressor of Ty 20 [Source:RGD Symbol;Acc:1307812]                                                                                           | 2 |
| ENSRNOG000000017508  | 1060.85  | 1263.62   | 858.08   | 0.68 | -0.56 | 1.20E-08 | 3.40E-07    | Suv420h2   | suppressor of variegation 4-20 homolog 2 (Drosophila) [Source:RGD Symbol;Acc:1305226]                                                         | 2 |
| ENSRNOG000000032258  | 421.55   | 418.13    | 424.96   | 1.02 | 0.02  | 0.888244 | 1           | Swt1       | Swt1 RNA endoribonuclease homolog (S. cerevisiae) [Source:RGD Symbol;Acc:1308695]                                                             | 2 |
| ENSRNOG000000012620  | 5952.75  | 5675.27   | 6230.23  | 1.10 | 0.13  | 0.073925 | 0.244926847 | Syng3      | synaptogyrin 3 [Source:RGD Symbol;Acc:1311801]                                                                                                | 2 |
| ENSRNOG000000008203  | 5578.59  | 4763.57   | 6393.62  | 1.34 | 0.42  | 0.06E-08 | 1.50E-06    | Synpr      | synaptoporin [Source:RGD Symbol;Acc:708366]                                                                                                   | 5 |
| ENSRNOG000000006426  | 1668.13  | 1366.63   | 1969.63  | 1.44 | 0.53  | 1.79E-09 | 5.95E-08    | Syt1       | synaptotagmin I [Source:RGD Symbol;Acc:3803]                                                                                                  | 3 |
| ENSRNOG000000014296  | 6.07     | 5.13      | 7.01     | 1.37 | 0.45  | 0.483875 | 0.788834873 | Syt10      | synaptotagmin X [Source:RGD Symbol;Acc:62041]                                                                                                 | 5 |
| ENSRNOG000000046139  | 64.32    | 53.74     | 74.89    | 1.39 | 0.48  | 0.033929 | 0.139456317 | Syt14      | synaptotagmin XIV [Source:RGD Symbol;Acc:1592654]                                                                                             | 2 |
| ENSRNOG000000009344  | 44.35    | 38.32     | 50.39    | 1.32 | 0.40  | 0.173232 | 0.436181002 | Syt16      | synaptotagmin XVI [Source:RGD Symbol;Acc:1564654]                                                                                             | 3 |
| ENSRNOG000000017333  | 7163.08  | 6175.54   | 8150.61  | 1.32 | 0.40  | 2.24E-07 | 5.10E-06    | Syt4       | synaptotagmin IV [Source:RGD Symbol;Acc:68397]                                                                                                | 5 |
| ENSRNOG000000018217  | 1326.01  | 1289.94   | 1362.08  | 1.06 | 0.08  | 0.340714 | 0.655124819 | Syt5       | synaptotagmin V [Source:RGD Symbol;Acc:3806]                                                                                                  | 5 |
| ENSRNOG000000026432  | 1185.87  | 1048.45   | 1323.29  | 1.26 | 0.34  | 0.000328 | 0.003357342 | Syt7       | synaptotagmin VII [Source:RGD Symbol;Acc:62013]                                                                                               | 5 |
| ENSRNOG000000019613  | 1135.99  | 996.43    | 1275.54  | 1.28 | 0.36  | 0.000155 | 0.001765206 | Syt9       | synaptotagmin IX [Source:RGD Symbol;Acc:621169]                                                                                               | 5 |
| ENSRNOG000000024172  | 137.12   | 152.13    | 122.12   | 0.80 | -0.32 | 0.076609 | 0.251204779 | T2         | brachyury 2 [Source:RGD Symbol;Acc:1597985]                                                                                                   | 5 |
| ENSRNOG000000026096  | 4.82     | 4.40      | 5.24     | 1.19 | 0.25  | 0.739515 | 0.975110568 | Taar9      | trace amine-associated receptor 9 [Source:RGD Symbol;Acc:631383]                                                                              | 1 |
| ENSRNOG000000007374  | 15022.84 | 13578.31  | 16467.36 | 1.21 | 0.28  | 0.000521 | 0.004963833 | Tacc1      | tachykinin, precursor 1 [Source:RGD Symbol;Acc:3807]                                                                                          | 7 |
| ENSRNOG000000017259  | 157.53   | 193.76    | 121.29   | 0.63 | -0.68 | 0.000161 | 0.001824401 | Tacc3      | transforming, acidic coiled-coil containing protein 3 [Source:RGD Symbol;Acc:1302948]                                                         | 2 |
| ENSRNOG000000005853  | 29.15    | 27.11     | 31.19    | 1.15 | 0.20  | 0.507481 | 0.809046399 | Tacr1      | tachykinin receptor 1 [Source:RGD Symbol;Acc:3811]                                                                                            | 1 |
| ENSRNOG000000050658  | 5.58     | 4.39      | 6.76     | 1.54 | 0.62  | 0.273818 | 0.578280883 | Tacr2      | tachykinin receptor 2 [Source:RGD Symbol;Acc:3812]                                                                                            | 1 |
| ENSRNOG000000009372  | 5.87     | 5.45      | 6.28     | 1.15 | 0.21  | 0.712641 | 0.957506299 | Tacr3      | tachykinin receptor 3 [Source:RGD Symbol;Acc:3810]                                                                                            | 1 |
| ENSRNOG000000015632  | 623.22   | 688.89    | 557.55   | 0.81 | -0.31 | 0.008821 | 0.049940421 | Taf1c      | TATA box binding protein (Tbp)-associated factor, RNA polymerase I, C [Source:RGD Symbol;Acc:1305658]                                         | 2 |
| ENSRNOG000000002453  | 826.06   | 748.30    | 903.81   | 1.21 | 0.27  | 0.011712 | 0.061952866 | Taf9b      | TAF9B RNA polymerase II, TATA box binding protein (TBP)-associated factor [Source:RGD Symbol;Acc:62]                                          | 2 |
| ENSRNOG0             |          |           |          |      |       |          |             |            |                                                                                                                                               |   |

|                      |          |          |          |      |       |          |             |             |                                                                                                       |   |
|----------------------|----------|----------|----------|------|-------|----------|-------------|-------------|-------------------------------------------------------------------------------------------------------|---|
| ENSRNOG000000019961  | 551.81   | 528.99   | 574.63   | 1.09 | 0.12  | 0.322877 | 0.635573622 | Tcte1       | t-complex-associated testis expressed 1 [Source:RGD Symbol;Acc:1305744]                               | 3 |
| ENSRNOG00000002278   | 416.01   | 500.93   | 331.10   | 0.66 | -0.60 | 0.06E-06 | 7.00E-05    | Tec         | tec protein tyrosine kinase [Source:RGD Symbol;Acc:620973]                                            | 2 |
| ENSRNOG00000007291   | 351.64   | 369.71   | 333.56   | 0.90 | -0.15 | 0.264297 | 0.565674791 | Terf1       | telomeric repeat binding factor (NIMA-interacting) 1 [Source:RGD Symbol;Acc:1311574]                  | 2 |
| ENSRNOG000000032978  | 1190.13  | 1127.99  | 1252.28  | 1.11 | 0.15  | 0.120182 | 0.343130242 | Tes         | testis derived transcript [Source:RGD Symbol;Acc:1566346]                                             | 2 |
| ENSRNOG000000024291  | 882.24   | 832.53   | 931.95   | 1.12 | 0.16  | 0.118894 | 0.340329964 | Tex9        | testis expressed 9 [Source:RGD Symbol;Acc:1304772]                                                    | 2 |
| ENSRNOG000000005227  | 171.61   | 197.72   | 145.49   | 0.74 | -0.44 | 0.01222  | 0.063951781 | Tfap4       | transcription factor AP-4 [Source:RGD Symbol;Acc:1308357]                                             | 2 |
| ENSRNOG000000001407  | 71.46    | 77.60    | 65.33    | 0.84 | -0.25 | 0.263872 | 0.565035659 | Tfr2        | transferrin receptor 2 [Source:RGD Symbol;Acc:1310152]                                                | 2 |
| ENSRNOG000000001766  | 5026.62  | 4564.55  | 5488.69  | 1.20 | 0.27  | 0.000588 | 0.005463378 | Tfrc        | transferrin receptor [Source:RGD Symbol;Acc:70488]                                                    | 2 |
| ENSRNOG000000020652  | 282.46   | 377.87   | 187.06   | 0.50 | -1.01 | 8.11E-12 | 3.50E-10    | Tgfb1       | transforming growth factor, beta 1 [Source:RGD Symbol;Acc:69051]                                      | 1 |
| ENSRNOG000000011710  | 15.10    | 14.73    | 15.46    | 1.05 | 0.07  | 0.91943  |             | Tgm5        | transglutaminase 5 [Source:RGD Symbol;Acc:1593353]                                                    | 5 |
| ENSRNOG000000020410  | 21.72    | 18.41    | 25.03    | 1.36 | 0.44  | 0.23439  | 0.526808974 | Th          | tyrosine hydroxylase [Source:RGD Symbol;Acc:3853]                                                     | 7 |
| ENSRNOG000000012471  | 1719.30  | 2330.38  | 1108.21  | 0.48 | -1.07 | 8.80E-36 | 1.38E-33    | Thbs4       | thrombospondin 4 [Source:RGD Symbol;Acc:62046]                                                        | 1 |
| ENSRNOG000000009066  | 5770.32  | 6029.12  | 5511.52  | 0.91 | -0.13 | 0.087116 | 0.27535349  | Thra        | thyroid hormone receptor alpha [Source:RGD Symbol;Acc:3857]                                           | 2 |
| ENSRNOG000000016813  | 365.16   | 364.14   | 366.18   | 1.01 | 0.01  | 0.926132 |             | Tia1        | TIA1 cytotoxic granule-associated RNA binding protein [Source:RGD Symbol;Acc:1305742]                 | 2 |
| ENSRNOG000000020271  | 1160.97  | 1153.51  | 1168.44  | 1.01 | 0.02  | 0.851293 |             | Tia1        | Tia1 cytotoxic granule-associated RNA binding protein-like 1 [Source:RGD Symbol;Acc:1595845]          | 2 |
| ENSRNOG000000016728  | 783.09   | 764.00   | 802.18   | 1.05 | 0.07  | 0.521415 | 0.821739113 | Tiam2       | T-cell lymphoma invasion and metastasis 2 [Source:RGD Symbol;Acc:2324148]                             | 2 |
| ENSRNOG000000010941  | 362.56   | 355.15   | 369.98   | 1.04 | 0.06  | 0.693006 | 0.943449877 | Tifa        | TRAF-interacting protein with forkhead-associated domain [Source:RGD Symbol;Acc:1359151]              | 1 |
| ENSRNOG000000031916  | 124.45   | 149.43   | 99.47    | 0.67 | -0.59 | 0.030205 | 0.021026091 | Timeless    | timeless circadian clock [Source:RGD Symbol;Acc:620939]                                               | 5 |
| ENSRNOG000000005882  | 1296.36  | 1227.60  | 1365.12  | 1.11 | 0.15  | 0.09724  | 0.29690287  | Tle1        | transducin-like enhancer of split 1 (E[sp]1) homolog, Drosophila [Source:RGD Symbol;Acc:1309237]      | 2 |
| ENSRNOG000000005874  | 436.21   | 518.28   | 354.14   | 0.68 | -0.55 | 2.60E-05 | 0.000369409 | Tle2        | transducin-like enhancer of split 2 [Source:RGD Symbol;Acc:1306665]                                   | 2 |
| ENSRNOG000000009822  | 70.93    | 90.16    | 51.71    | 0.57 | -0.80 | 0.00031  | 0.003198267 | Tlr2        | toll-like receptor 2 [Source:RGD Symbol;Acc:735138]                                                   | 1 |
| ENSRNOG000000021726  | 97.54    | 101.67   | 93.41    | 0.92 | -0.12 | 0.496676 | 0.801006303 | Tlr3        | toll-like receptor 3 [Source:RGD Symbol;Acc:735171]                                                   | 1 |
| ENSRNOG000000010522  | 96.90    | 82.79    | 111.00   | 1.34 | 0.42  | 0.049593 | 0.18410165  | Tlr4        | toll-like receptor 4 [Source:RGD Symbol;Acc:3870]                                                     | 1 |
| ENSRNOG000000008343  | 2344.90  | 2494.88  | 2194.92  | 0.88 | -0.18 | 0.02999  | 0.127225548 | Tlx2        | T-cell leukemia homeobox 2 [Source:RGD Symbol;Acc:1595506]                                            | 2 |
| ENSRNOG000000004976  | 2109.57  | 2166.04  | 2053.10  | 0.95 | -0.08 | 0.3697   | 0.686012731 | Tlx3        | T-cell leukemia, homeobox 3 [Source:RGD Symbol;Acc:1564190]                                           | 2 |
| ENSRNOG0000000046086 | 90.50    | 115.94   | 65.07    | 0.56 | -0.83 | 0.000141 | 0.001624357 | Tmc8        | transmembrane channel-like 8 [Source:RGD Symbol;Acc:1591150]                                          | 2 |
| ENSRNOG000000000033  | 1903.87  | 1890.19  | 1917.55  | 1.01 | 0.02  | 0.820595 |             | Tmcc2       | transmembrane and coiled-coil domain family 2 [Source:RGD Symbol;Acc:1311960]                         | 2 |
| ENSRNOG000000007713  | 893.96   | 802.58   | 985.34   | 1.23 | 0.30  | 0.003909 | 0.025985094 | Tmcc3       | transmembrane and coiled-coil domain family 3 [Source:RGD Symbol;Acc:1307241]                         | 2 |
| ENSRNOG000000008034  | 688.63   | 609.91   | 767.35   | 1.26 | 0.33  | 0.004668 | 0.029899618 | Tmeff1      | transmembrane protein with EGF-like and two follistatin-like domains 1 [Source:RGD Symbol;Acc:620005] | 5 |
| ENSRNOG000000002434  | 447.13   | 394.79   | 499.47   | 1.27 | 0.34  | 0.008049 | 0.046384145 | Tmem100     | transmembrane protein 100 [Source:RGD Symbol;Acc:1560541]                                             | 3 |
| ENSRNOG000000023628  | 1019.90  | 966.94   | 1072.85  | 1.11 | 0.15  | 0.12514  | 0.350384983 | Tmem106a    | transmembrane protein 106A [Source:RGD Symbol;Acc:1309043]                                            | 5 |
| ENSRNOG000000000963  | 1945.29  | 1930.76  | 1959.82  | 1.02 | 0.02  | 0.80084  |             | Tmem132c    | transmembrane protein 132C [Source:RGD Symbol;Acc:1583824]                                            | 5 |
| ENSRNOG000000007455  | 4756.37  | 4701.28  | 4817.47  | 1.02 | 0.03  | 0.592144 | 0.869513322 | Tmem132e    | transmembrane protein 132E [Source:RGD Symbol;Acc:1565522]                                            | 2 |
| ENSRNOG000000019958  | 763.43   | 780.66   | 746.20   | 0.96 | -0.07 | 0.554618 | 0.840362457 | Tmem151b    | transmembrane protein 151B [Source:RGD Symbol;Acc:1562074]                                            | 5 |
| ENSRNOG000000010866  | 38.95    | 38.79    | 39.11    | 1.01 | 0.01  | 0.938394 |             | Tmem154     | transmembrane protein 154 [Source:RGD Symbol;Acc:1563262]                                             | 2 |
| ENSRNOG000000004757  | 1045.22  | 1111.63  | 978.80   | 0.88 | -0.18 | 0.066831 | 0.228033215 | Tmem158     | transmembrane protein 158 [Source:RGD Symbol;Acc:708473]                                              | 5 |
| ENSRNOG0000000048250 | 875.26   | 862.54   | 887.98   | 1.03 | 0.04  | 0.7276   | 0.966949403 | Tmem159     | transmembrane protein 159 [Source:RGD Symbol;Acc:727895]                                              | 2 |
| ENSRNOG000000012787  | 1941.41  | 1843.28  | 2039.54  | 1.11 | 0.15  | 0.094515 | 0.291504931 | Tmem164     | transmembrane protein 164 [Source:RGD Symbol;Acc:1563286]                                             | 5 |
| ENSRNOG000000016091  | 543.36   | 485.35   | 601.38   | 1.24 | 0.31  | 0.010145 | 0.055637685 | Tmem169     | transmembrane protein 169 [Source:RGD Symbol;Acc:1582820]                                             | 2 |
| ENSRNOG0000000042137 | 122.66   | 126.01   | 119.32   | 0.95 | -0.08 | 0.676114 | 0.934020061 | Tmem173     | transmembrane protein 173 [Source:RGD Symbol;Acc:1562525]                                             | 2 |
| ENSRNOG000000020061  | 350.47   | 356.93   | 344.01   | 0.96 | -0.05 | 0.673696 | 0.93255621  | Tmem198     | transmembrane protein 198 [Source:RGD Symbol;Acc:2319152]                                             | 2 |
| ENSRNOG0000000047783 | 139.14   | 118.14   | 160.13   | 1.36 | 0.44  | 0.024497 | 0.109965689 | Tmem200a    | transmembrane protein 200A [Source:RGD Symbol;Acc:1564024]                                            | 5 |
| ENSRNOG000000003915  | 564.75   | 564.85   | 564.65   | 1.00 | 0.00  | 0.965299 |             | Tmem206     | transmembrane protein 206 [Source:RGD Symbol;Acc:1359339]                                             | 2 |
| ENSRNOG000000018167  | 22.02    | 24.19    | 19.85    | 0.82 | -0.29 | 0.39517  | 0.713438092 | Tmem221     | transmembrane protein 221 [Source:RGD Symbol;Acc:2319149]                                             | 2 |
| ENSRNOG0000000031348 | 4.33     | 3.53     | 5.13     | 1.45 | 0.54  | 0.350705 | 0.66755978  | Tmem232     | transmembrane protein 232 [Source:RGD Symbol;Acc:1559548]                                             | 6 |
| ENSRNOG0000000049908 | 529.17   | 511.74   | 546.60   | 1.07 | 0.10  | 0.451504 | 0.767659038 | Tmem29      | transmembrane protein 29 [Source:RGD Symbol;Acc:2323310]                                              | 2 |
| ENSRNOG000000008046  | 189.28   | 185.50   | 193.05   | 1.04 | 0.06  | 0.703641 | 0.951812879 | Tmem30b     | transmembrane protein 30B [Source:RGD Symbol;Acc:1308732]                                             | 3 |
| ENSRNOG000000008515  | 723.08   | 704.71   | 741.46   | 1.05 | 0.07  | 0.426102 | 0.746342921 | Tmem45b     | transmembrane protein 45b [Source:RGD Symbol;Acc:1305586]                                             | 5 |
| ENSRNOG000000014197  | 417.87   | 451.32   | 384.42   | 0.85 | -0.23 | 0.081805 | 0.263031851 | Tmem51      | transmembrane protein 51 [Source:RGD Symbol;Acc:1565452]                                              | 2 |
| ENSRNOG000000003310  | 357.43   | 293.58   | 421.29   | 1.44 | 0.52  | 0.000237 | 0.002570912 | Tmem63a     | transmembrane protein 63a [Source:RGD Symbol;Acc:1308629]                                             | 5 |
| ENSRNOG000000023340  | 710.14   | 568.77   | 851.52   | 1.50 | 0.58  | 1.29E-07 | 3.04E-06    | Tmem72      | transmembrane protein 72 [Source:RGD Symbol;Acc:1308850]                                              | 2 |
| ENSRNOG000000005114  | 230.63   | 212.83   | 248.43   | 1.17 | 0.22  | 0.166419 | 0.424931389 | Tmem74      | transmembrane protein 74 [Source:RGD Symbol;Acc:1566279]                                              | 2 |
| ENSRNOG000000019414  | 41.32    | 39.73    | 42.92    | 1.08 | 0.11  | 0.660895 | 0.923820536 | Tmem79      | transmembrane protein 79 [Source:RGD Symbol;Acc:1309886]                                              | 5 |
| ENSRNOG0000000038607 | 76.09    | 79.98    | 72.20    | 0.90 | -0.15 | 0.596153 | 0.872904925 | Tmem86b     | transmembrane protein 86B [Source:RGD Symbol;Acc:1593455]                                             | 2 |
| ENSRNOG000000006142  | 0.86     | 1.25     | 0.48     | 0.39 | -1.37 | 0.428847 | 0.747921859 | Tmem8c      | transmembrane protein 8C [Source:RGD Symbol;Acc:1306074]                                              | 3 |
| ENSRNOG000000002002  | 0.48     | 0.48     | 0.48     | 1.01 | 0.01  | 1        |             | Tmprss11bnl | transmembrane protease, serine 11B N terminal like [Source:RGD Symbol;Acc:1303278]                    | 2 |
| ENSRNOG000000036921  | 426.67   | 451.51   | 401.82   | 0.89 | -0.17 | 0.191778 | 0.465493179 | Tmsb10      | thymosin, beta 10 [Source:RGD Symbol;Acc:62022]                                                       | 6 |
| ENSRNOG0000000047931 | 48663.36 | 47100.92 | 50225.81 | 1.07 | 0.09  | 0.339283 | 0.653449399 | Tmsb4x      | thymosin, beta 4, X chromosome [Source:RGD Symbol;Acc:621622]                                         | 6 |
| ENSRNOG000000014310  | 2039.28  | 1893.55  | 2185.00  | 1.15 | 0.21  | 0.01088  | 0.058434733 | Tmtc4       | transmembrane and tetrapeptide repeat containing 4 [Source:RGD Symbol;Acc:1560183]                    | 3 |
| ENSRNOG000000008037  | 13.13    | 19.48    | 6.77     | 0.35 | -1.52 | 0.000285 | 0.002994104 | Tnf         | tumor necrosis factor [Source:RGD Symbol;Acc:3876]                                                    | 1 |
| ENSRNOG000000010165  | 206.48   | 241.79   | 171.17   | 0.71 | -0.50 | 0.003254 | 0.022303962 | Tnfaip2     | tumor necrosis factor, alpha-induced protein 2 [Source:RGD Symbol;Acc:1594556]                        | 1 |
| ENSRNOG0000000049517 | 113.66   | 120.42   | 106.91   | 0.89 | -0.17 | 0.425612 | 0.745973509 | Tnfaip3     | tumor necrosis factor, alpha-induced protein 3 [Source:RGD Symbol;Acc:1589275]                        | 2 |
| ENSRNOG000000024230  | 21.05    | 21.01    | 21.09    | 1.00 | 0.00  | 1        |             | Tnfaip8l3   | tumor necrosis factor, alpha-induced protein 8-like 3 [Source:RGD Symbol;Acc:1311533]                 | 5 |
| ENSRNOG000000015615  | 129.91   | 136.70   | 123.12   | 0.90 | -0.15 | 0.49635  | 0.800688668 | Tnfrsf11a   | tumor necrosis factor receptor superfamily, member 11a, NFkB activator [Source:RGD Symbol;Acc:15636]  | 2 |
| ENSRNOG000000013820  | 33.04    | 55.23    | 10.86    | 0.20 | -2.35 | 3.85E-13 | 1.89E-11    | Tnfrsf14    | tumor necrosis factor receptor superfamily, member 14 [Source:RGD Symbol;Acc:1310115]                 | 2 |
| ENSRNOG0000000031312 | 2103.40  | 2284.20  | 1922.60  | 0.84 | -0.25 | 0.003404 | 0.023181972 | Tnfrsf1a    | tumor necrosis factor receptor superfamily, member 1a [Source:RGD Symbol;Acc:621237]                  | 1 |
| ENSRNOG000000016575  | 156.25   | 220.09   | 92.41    | 0.42 | -1.25 | 6.74E-12 | 2.94E-10    | Tnfrsf1b    | tumor necrosis factor receptor superfamily, member 1b [Source:RGD Symbol;Acc:621238]                  | 1 |
| ENSRNOG000000002468  | 141.66   | 92.90    | 190.42   | 2.05 | 1.04  | 3.23E-08 | 8.41E-07    | Tnr         | tenascin R [Source:RGD Symbol;Acc:3886]                                                               | 5 |
| ENSRNOG0000000033581 | 1650.82  | 1904.79  | 1396.85  | 0.73 | -0.45 | 2.84E-07 | 6.33E-06    | Tnxb        | tenascin XB [Source:MGI Symbol;Acc:MGI:1932137]                                                       | 1 |
| ENSRNOG000000002474  | 562.88   | 481.81   | 643.95   | 1.34 | 0.42  | 0.00055  | 0.005175191 | Tom1l1      | target of myb1 (chicken)-like 1 [Source:RGD Symbol;Acc:1562626]                                       | 2 |
| ENSRNOG0000000032404 | 127.70   | 185.59   | 69.82    | 0.38 | -1.41 | 8.01E-13 | 3.81E-11    | Top2a       | topoisomerase (DNA) II alpha [Source:RGD Symbol;Acc:62048]                                            | 2 |
| ENSRNOG0000000008146 | 719.29   | 659.37   | 779.21   | 1.18 | 0.24  | 0.029228 | 0.125104235 | Tox2        | TOX high mobility group box family member 2 [Source:RGD Symbol;Acc:735184]                            | 5 |
| ENSRNOG000000028649  | 349.73   | 302.85   | 396.61   | 1.31 | 0.39  | 0.006934 | 0.04116286  | Tox3        | TOX high mobility group box family member 3 [Source:RGD Symbol;Acc:1311529]                           | 2 |
| ENSRNOG000000011441  | 4398.74  | 4012.55  | 4784.93  | 1.19 | 0.25  | 0.001062 | 0.008944258 | Tpd52       | tumor protein D52 [Source:RGD Symbol;Acc:1306767]                                                     | 2 |
| ENSRNOG0000000008296 | 2550.21  | 2728.78  | 2371.63  | 0.87 | -0.20 | 0.013789 | 0.070287213 | Tpgs1       | tubulin polyglutamylase complex subunit 1 [Source:RGD Symbol;Acc:1588613]                             | 2 |
| ENSRNOG000000011672  | 102.26   | 95.07    | 109.45   | 1.15 | 0.20  | 0.33326  | 0.64636623  | Tph1        | tryptophan hydroxylase 1 [Source:RGD Symbol;Acc:3895]                                                 | 1 |
| ENSRNOG000000003880  | 484.61   | 487.14   | 482.08   | 0.99 | -0.02 | 0.829978 |             | Tph2        | tryptophan hydroxylase 2 [Source:RGD Symbol;Acc:631332]                                               | 1 |
| ENSRNOG000000029922  |          |          |          |      |       |          |             |             |                                                                                                       |   |

|                     |          |          |          |      |       |          |             |          |                                                                                                    |   |
|---------------------|----------|----------|----------|------|-------|----------|-------------|----------|----------------------------------------------------------------------------------------------------|---|
| ENSRNOG00000012723  | 4.37     | 4.59     | 4.15     | 0.90 | -0.15 | 0.860023 | 1           | Trim55   | tripartite motif-containing 55 [Source:RGD Symbol;Acc:1306943]                                     | 2 |
| ENSRNOG00000026430  | 6.85     | 11.07    | 2.62     | 0.24 | -2.08 | 0.000278 | 0.002931812 | Trim58   | tripartite motif-containing 58 [Source:RGD Symbol;Acc:1566174]                                     | 2 |
| ENSRNOG00000010515  | 163.64   | 160.15   | 167.14   | 1.04 | 0.06  | 0.823258 | 1           | Trim59   | tripartite motif-containing 59 [Source:RGD Symbol;Acc:1311956]                                     | 2 |
| ENSRNOG00000002914  | 1797.31  | 1950.34  | 1644.27  | 0.84 | -0.25 | 0.004868 | 0.03095747  | Trmt1    | tRNA methyltransferase 1 homolog (S. cerevisiae) [Source:RGD Symbol;Acc:1305992]                   | 2 |
| ENSRNOG00000012454  | 308.72   | 295.57   | 321.87   | 1.09 | 0.12  | 0.469755 | 0.780237584 | Trmt10b  | tRNA methyltransferase 10 homolog B (S. cerevisiae) [Source:RGD Symbol;Acc:1310735]                | 2 |
| ENSRNOG00000026483  | 2828.95  | 2894.22  | 2763.69  | 0.95 | -0.07 | 0.41551  | 0.735380316 | Trmp1    | TMF1-regulated nuclear protein 1 [Source:RGD Symbol;Acc:1582917]                                   | 2 |
| ENSRNOG00000007354  | 3735.34  | 3075.18  | 4395.50  | 1.43 | 0.52  | 8.63E-11 | 3.39E-09    | Trpa1    | transient receptor potential cation channel, subfamily A, member 1 [Source:RGD Symbol;Acc:1303284] | 7 |
| ENSRNOG00000016070  | 417.30   | 415.76   | 418.84   | 1.01 | 0.01  | 0.919164 | 1           | Trpc3    | transient receptor potential cation channel, subfamily C, member 3 [Source:RGD Symbol;Acc:61973]   | 5 |
| ENSRNOG00000011133  | 34.12    | 32.52    | 35.72    | 1.10 | 0.14  | 0.691084 | 0.943449877 | Trpc4    | transient receptor potential cation channel, subfamily C, member 4 [Source:RGD Symbol;Acc:621276]  | 5 |
| ENSRNOG00000006324  | 104.14   | 111.57   | 96.71    | 0.87 | -0.21 | 0.300397 | 0.607933484 | Trpc6    | transient receptor potential cation channel, subfamily C, member 6 [Source:RGD Symbol;Acc:619788]  | 5 |
| ENSRNOG00000012727  | 32.51    | 31.02    | 33.99    | 1.10 | 0.13  | 0.66578  | 0.927281504 | Trpc7    | transient receptor potential cation channel, subfamily C, member 7 [Source:RGD Symbol;Acc:628820]  | 3 |
| ENSRNOG00000001216  | 788.03   | 828.73   | 747.32   | 0.90 | -0.15 | 0.162625 | 0.418395271 | Trpm2    | transient receptor potential cation channel, subfamily M, member 2 [Source:RGD Symbol;Acc:1311889] | 1 |
| ENSRNOG00000027770  | 814.24   | 661.16   | 967.33   | 1.46 | 0.55  | 8.31E-08 | 2.02E-06    | Trpm3    | transient receptor potential cation channel, subfamily M, member 3 [Source:RGD Symbol;Acc:1304888] | 1 |
| ENSRNOG00000019035  | 4351.48  | 3615.03  | 5087.93  | 1.41 | 0.49  | 9.02E-11 | 3.53E-09    | Trpm8    | transient receptor potential cation channel, subfamily M, member 8 [Source:RGD Symbol;Acc:620762]  | 4 |
| ENSRNOG00000019486  | 3678.28  | 3331.66  | 4024.90  | 1.21 | 0.27  | 0.000612 | 0.005665869 | Trpv1    | transient receptor potential cation channel, subfamily V, member 1 [Source:RGD Symbol;Acc:628841]  | 7 |
| ENSRNOG00000003104  | 2121.30  | 2051.68  | 2190.92  | 1.07 | 0.09  | 0.279382 | 0.585056918 | Trpv2    | transient receptor potential cation channel, subfamily V, member 2 [Source:RGD Symbol;Acc:3965]    | 6 |
| ENSRNOG00000019606  | 161.76   | 167.11   | 156.40   | 0.94 | -0.10 | 0.626931 | 0.898142793 | Trpv3    | transient receptor potential cation channel, subfamily V, member 3 [Source:RGD Symbol;Acc:1564531] | 1 |
| ENSRNOG00000001195  | 39.57    | 51.67    | 27.47    | 0.53 | -0.91 | 0.001073 | 0.00900983  | Trpv4    | transient receptor potential cation channel, subfamily V, member 4 [Source:RGD Symbol;Acc:69337]   | 1 |
| ENSRNOG00000017321  | 303.54   | 312.09   | 294.99   | 0.95 | -0.08 | 0.534441 | 0.83315454  | Trub1    | TruB pseudouridine (psi) synthase family member 1 [Source:RGD Symbol;Acc:1308502]                  | 2 |
| ENSRNOG00000005069  | 0.62     | 0.80     | 0.44     | 0.55 | -0.86 | 0.935771 | 1           | Tsen34   | TSEN34 tRNA splicing endonuclease subunit [Source:RGD Symbol;Acc:1359564]                          | 2 |
| ENSRNOG000000048433 | 2492.41  | 2092.39  | 2892.43  | 1.38 | 0.47  | 6.98E-09 | 2.07E-07    | Tshz2    | teashirt zinc finger homeobox 2 [Source:RGD Symbol;Acc:6490867]                                    | 2 |
| ENSRNOG000000048433 | 2492.41  | 2092.39  | 2892.43  | 1.38 | 0.47  | 6.98E-09 | 2.07E-07    | Tshz2    | teashirt zinc finger homeobox 2 [Source:RGD Symbol;Acc:6490867]                                    | 2 |
| ENSRNOG000000023320 | 164.66   | 172.50   | 156.83   | 0.91 | -0.14 | 0.411658 | 0.730762601 | Tspan1   | tetraspanin 1 [Source:RGD Symbol;Acc:1303308]                                                      | 3 |
| ENSRNOG00000010813  | 1485.22  | 1553.74  | 1416.71  | 0.91 | -0.13 | 0.13973  | 0.378825035 | Tspan14  | tetraspanin 14 [Source:RGD Symbol;Acc:1305714]                                                     | 2 |
| ENSRNOG000000023338 | 2208.78  | 1984.30  | 2433.26  | 1.23 | 0.29  | 0.000654 | 0.005999252 | Tspan2   | tetraspanin 2 [Source:RGD Symbol;Acc:620982]                                                       | 5 |
| ENSRNOG00000007900  | 230.68   | 244.47   | 216.90   | 0.89 | -0.17 | 0.294971 | 0.601167889 | Tspan33  | tetraspanin 33 [Source:RGD Symbol;Acc:1560915]                                                     | 2 |
| ENSRNOG00000015913  | 1514.71  | 1530.64  | 1498.77  | 0.98 | -0.03 | 0.73046  | 0.968938187 | Tspan5   | tetraspanin 5 [Source:RGD Symbol;Acc:1303176]                                                      | 2 |
| ENSRNOG00000010549  | 499.51   | 629.39   | 369.62   | 0.59 | -0.77 | 4.82E-10 | 1.72E-08    | Tspo     | translocator protein [Source:RGD Symbol;Acc:2228]                                                  | 5 |
| ENSRNOG000000047123 | 187.54   | 225.10   | 149.97   | 0.67 | -0.59 | 0.001138 | 0.009435337 | Tstd1    | thiosulfate sulfurtransferase (rhodanese)-like domain containing 1 [Source:RGD Symbol;Acc:2323815] | 5 |
| ENSRNOG00000011261  | 450.58   | 437.70   | 463.46   | 1.06 | 0.08  | 0.512904 | 0.813510169 | Ttc14    | tetratricopeptide repeat domain 14 [Source:RGD Symbol;Acc:1310045]                                 | 2 |
| ENSRNOG00000007189  | 28.42    | 30.38    | 26.46    | 0.87 | -0.20 | 0.555638 | 0.840961435 | Ttc22    | tetratricopeptide repeat domain 22 [Source:RGD Symbol;Acc:1561518]                                 | 2 |
| ENSRNOG00000012342  | 43.18    | 41.18    | 45.17    | 1.10 | 0.13  | 0.676358 | 0.934129734 | Ttc29    | tetratricopeptide repeat domain 29 [Source:RGD Symbol;Acc:1589777]                                 | 5 |
| ENSRNOG00000004542  | 286.49   | 280.03   | 292.96   | 1.05 | 0.07  | 0.623874 | 0.894923872 | Ttc8     | tetratricopeptide repeat domain 8 [Source:RGD Symbol;Acc:1307769]                                  | 2 |
| ENSRNOG000000004939 | 2.56     | 1.76     | 3.37     | 1.92 | 0.94  | 0.324145 | 0.636423112 | Ttl6     | tubulin tyrosine ligase-like family, member 6 [Source:RGD Symbol;Acc:1311922]                      | 2 |
| ENSRNOG00000017558  | 10929.55 | 10997.90 | 10861.19 | 0.99 | -0.02 | 0.814559 | 1           | Tubb2a   | tubulin, beta 2A class Ia [Source:RGD Symbol;Acc:1588452]                                          | 2 |
| ENSRNOG00000017445  | 16096.78 | 15843.69 | 16349.87 | 1.03 | 0.05  | 0.598632 | 0.874406049 | Tubb2b   | tubulin, beta 2B class Ib [Source:RGD Symbol;Acc:1309427]                                          | 5 |
| ENSRNOG000000000821 | 59188.32 | 61591.80 | 56784.85 | 0.92 | -0.12 | 0.205594 | 0.486255545 | Tubb5    | tubulin, beta 5 class I [Source:RGD Symbol;Acc:628596]                                             | 2 |
| ENSRNOG00000020923  | 481.01   | 504.26   | 457.76   | 0.91 | -0.14 | 0.2571   | 0.555929551 | Tuft1    | tuftelin 1 [Source:RGD Symbol;Acc:1310373]                                                         | 2 |
| ENSRNOG00000022239  | 20590.44 | 18756.00 | 22424.87 | 1.20 | 0.26  | 0.000941 | 0.008093058 | Tusc5    | tumor suppressor candidate 5 [Source:RGD Symbol;Acc:1307639]                                       | 2 |
| ENSRNOG00000012081  | 7782.68  | 7456.66  | 8108.70  | 1.09 | 0.12  | 0.132399 | 0.364779475 | Txn1     | thioredoxin 1 [Source:RGD Symbol;Acc:621157]                                                       | 2 |
| ENSRNOG00000002452  | 885.98   | 928.47   | 843.49   | 0.91 | -0.14 | 0.175249 | 0.439505256 | Txndc11  | thioredoxin domain containing 11 [Source:RGD Symbol;Acc:1307538]                                   | 2 |
| ENSRNOG00000001890  | 747.83   | 787.42   | 708.25   | 0.90 | -0.15 | 0.155024 | 0.407161333 | Txnrd2   | thioredoxin reductase 2 [Source:RGD Symbol;Acc:61960]                                              | 1 |
| ENSRNOG000000032948 | 967.04   | 1012.19  | 921.89   | 0.91 | -0.13 | 0.184209 | 0.453551256 | Tyk2     | tyrosine kinase 2 [Source:RGD Symbol;Acc:2320469]                                                  | 2 |
| ENSRNOG000000037225 | 116.27   | 103.29   | 129.25   | 1.25 | 0.32  | 0.093973 | 0.290386915 | Tyms     | thymidylate synthetase [Source:RGD Symbol;Acc:3921]                                                | 2 |
| ENSRNOG000000029318 | 12224.40 | 10988.55 | 13460.26 | 1.22 | 0.29  | 0.000105 | 0.01259302  | Tyrr1    | tyrosinase-related protein 1 [Source:RGD Symbol;Acc:1593266]                                       | 1 |
| ENSRNOG00000010100  | 225.03   | 220.41   | 229.64   | 1.04 | 0.06  | 0.757612 | 0.98542983  | Tyw5     | tRNA-yW synthesizing protein 5 [Source:RGD Symbol;Acc:1311269]                                     | 2 |
| ENSRNOG00000012868  | 1794.10  | 2017.73  | 1570.48  | 0.78 | -0.36 | 2.93E-05 | 0.000409645 | Uaca     | uveal autoantigen with coiled-coil domains and ankyrin repeats [Source:RGD Symbol;Acc:1560011]     | 2 |
| ENSRNOG000000046295 | 0.13     | 0.00     | 0.27     | Inf  | Inf   | 1        | 1           | Ubald1   | UBA-like domain containing 1 [Source:RGD Symbol;Acc:1359443]                                       | 2 |
| ENSRNOG00000010029  | 487.08   | 500.26   | 473.90   | 0.95 | -0.08 | 0.560192 | 0.844916287 | Ubald2   | UBA-like domain containing 2 [Source:RGD Symbol;Acc:1311298]                                       | 2 |
| ENSRNOG00000015131  | 30.73    | 45.43    | 16.02    | 0.35 | -1.50 | 1.61E-06 | 3.03E-05    | Ube2c    | ubiquitin-conjugating enzyme E2C [Source:RGD Symbol;Acc:1305382]                                   | 2 |
| ENSRNOG000000030467 | 799.81   | 725.45   | 874.18   | 1.21 | 0.27  | 0.0118   | 0.062308933 | Ube2l6   | ubiquitin-conjugating enzyme E2L 6 [Source:RGD Symbol;Acc:1307960]                                 | 2 |
| ENSRNOG000000034075 | 1521.94  | 1405.23  | 1638.65  | 1.17 | 0.22  | 0.011573 | 0.061419783 | Ube2ql1  | ubiquitin-conjugating enzyme E2Q family-like 1 [Source:RGD Symbol;Acc:1598121]                     | 2 |
| ENSRNOG000000005564 | 200.91   | 201.52   | 200.30   | 0.99 | -0.01 | 0.983835 | 1           | Ubn2     | ubiquitin 2 [Source:RGD Symbol;Acc:1310722]                                                        | 5 |
| ENSRNOG00000002343  | 92741.09 | 94121.42 | 91360.76 | 0.97 | -0.04 | 0.656998 | 0.921006032 | Uchl1    | ubiquitin carboxyl-terminal esterase L1 (ubiquitin thiolesterase) [Source:RGD Symbol;Acc:3928]     | 1 |
| ENSRNOG00000017854  | 3864.80  | 4148.95  | 3589.65  | 0.86 | -0.21 | 0.007093 | 0.041906331 | Ucp2     | uncoupling protein 2 (mitochondrial, proton carrier) [Source:RGD Symbol;Acc:3932]                  | 1 |
| ENSRNOG000000015644 | 2259.33  | 2049.65  | 2460.01  | 1.20 | 0.27  | 0.001308 | 0.010544588 | Ugcg     | UDP-glucose ceramide glucosyltransferase [Source:RGD Symbol;Acc:621870]                            | 2 |
| ENSRNOG000000028907 | 0.23     | 0.24     | 0.22     | 0.90 | -0.14 | 1        | 1           | Ugt2b7   | UDP glucuronosyltransferase 2 family, polypeptide B7 [Source:RGD Symbol;Acc:708417]                | 2 |
| ENSRNOG000000048411 | 69.99    | 92.84    | 47.14    | 0.51 | -0.98 | 3.09E-05 | 0.000430557 | Uhrf1    | ubiquitin-like with PHD and ring finger domains 1 [Source:RGD Symbol;Acc:1595855]                  | 1 |
| ENSRNOG000000050317 | 2043.70  | 1876.18  | 2211.22  | 1.18 | 0.24  | 0.004974 | 0.031503999 | Uhrf1bp1 | UHRF1 binding protein 1-like [Source:RGD Symbol;Acc:1594520]                                       | 2 |
| ENSRNOG00000016891  | 943.63   | 965.03   | 922.23   | 0.96 | -0.07 | 0.464366 | 0.780189247 | Uimc1    | ubiquitin interaction motif containing 1 [Source:RGD Symbol;Acc:1307009]                           | 2 |
| ENSRNOG00000011060  | 515.53   | 547.80   | 483.27   | 0.88 | -0.18 | 0.139279 | 0.377992648 | Unc119   | UNC-119 homolog (C. elegans) [Source:RGD Symbol;Acc:3942]                                          | 2 |
| ENSRNOG000000008237 | 278.76   | 281.97   | 275.55   | 0.98 | -0.03 | 0.840122 | 1           | Unc13b   | unc-13 homolog B (C. elegans) [Source:RGD Symbol;Acc:619723]                                       | 2 |
| ENSRNOG000000007694 | 665.11   | 539.78   | 790.45   | 1.46 | 0.55  | 7.69E-07 | 1.57E-05    | Unc13c   | unc-13 homolog C (C. elegans) [Source:RGD Symbol;Acc:628592]                                       | 5 |
| ENSRNOG000000007439 | 223.57   | 255.11   | 192.03   | 0.75 | -0.41 | 0.012144 | 0.063680934 | Unc13d   | unc-13 homolog D (C. elegans) [Source:RGD Symbol;Acc:628593]                                       | 5 |
| ENSRNOG00000011858  | 12.36    | 9.40     | 15.33    | 1.63 | 0.71  | 0.007291 | 0.275696991 | Unc5d    | unc-5 homolog D (C. elegans) [Source:RGD Symbol;Acc:1309245]                                       | 5 |
| ENSRNOG000000008728 | 508.98   | 427.41   | 590.56   | 1.38 | 0.47  | 0.000125 | 0.001463188 | Unc79    | unc-79 homolog (C. elegans) [Source:RGD Symbol;Acc:1311117]                                        | 2 |
| ENSRNOG000000039994 | 891.11   | 874.92   | 907.30   | 1.04 | 0.05  | 0.670938 | 0.930639558 | Upf3b    | UPF3 regulator of nonsense transcripts homolog B (yeast) [Source:RGD Symbol;Acc:1560264]           | 2 |
| ENSRNOG00000014463  | 756.52   | 769.02   | 744.02   | 0.97 | -0.05 | 0.65728  | 0.921094162 | Urf1     | URI1, prefoldin-like chaperone [Source:RGD Symbol;Acc:1310358]                                     | 2 |
| ENSRNOG00000017810  | 433.44   | 432.40   | 434.48   | 1.00 | 0.01  | 0.917331 | 1           | Uros     | uroporphyrinogen III synthase [Source:RGD Symbol;Acc:1310396]                                      | 2 |
| ENSRNOG000000009049 | 2057.23  | 2083.44  | 2031.02  | 0.97 | -0.04 | 0.65241  | 0.917568787 | Usp11    | ubiquitin specific peptidase 11 [Source:RGD Symbol;Acc:1303052]                                    | 3 |
| ENSRNOG000000034111 | 191.75   | 175.43   | 208.07   | 1.19 | 0.25  | 0.151836 | 0.421154731 | Usp12    | ubiquitin specific peptidase 12 [Source:RGD Symbol;Acc:1308045]                                    | 2 |
| ENSRNOG00000013866  | 173.05   | 178.55   | 167.54   | 0.94 | -0.09 | 0.699409 | 0.947865963 | Usp49    | ubiquitin specific peptidase 49 [Source:RGD Symbol;Acc:1310513]                                    | 2 |
| ENSRNOG000000002644 | 781.79   | 771.62   | 791.96   | 1.03 | 0.04  | 0.800004 | 1           | Utp18    | UTP18 small subunit (SSU) processome component homolog (yeast) [Source:RGD Symbol;Acc:1309957]     | 2 |
| ENSRNOG000000006989 | 10489.97 | 10286.21 | 10693.74 | 1.04 | 0.06  | 0.453696 | 0.769906813 | Vamp2    | vesicle-associated membrane protein 2 [Source:RGD Symbol;Acc:3949]                                 | 2 |
| ENSRNOG000000003071 | 3654.91  | 3480.78  | 3829.04  | 1.10 | 0.14  | 0.089384 | 0.280619393 | Vamp4    | vesicle-associated membrane protein 4 [Source:RGD Symbol;Acc:1309753]                              | 1 |
| ENSRNOG000000000833 | 829.34   | 918.86   | 739.82   | 0.81 | -0.31 | 0.002874 | 0.020196274 | Vars2    | valyl-tRNA synthetase 2, mitochondrial [Source:RGD Symbol;Acc:1303122]                             | 2 |
| ENSRNOG000000020485 | 432.09</ |          |          |      |       |          |             |          |                                                                                                    |   |

|                      |          |          |          |      |        |          |             |         |                                                                                                           |   |
|----------------------|----------|----------|----------|------|--------|----------|-------------|---------|-----------------------------------------------------------------------------------------------------------|---|
| ENSRNOG00000010480   | 879.00   | 816.32   | 941.69   | 1.15 | 0.21   | 0.043559 | 0.167831799 | Vstm5   | V-set and transmembrane domain containing 5 [Source:RGD Symbol;Acc:1563328]                               | 2 |
| ENSRNOG00000011734   | 2021.94  | 1940.29  | 2103.58  | 1.08 | 0.12   | 0.19669  | 0.473228415 | Vt1b1   | vesicle transport through interaction with t-SNAREs 1B [Source:RGD Symbol;Acc:2323682]                    | 2 |
| ENSRNOG00000011678   | 382.60   | 336.58   | 428.63   | 1.27 | 0.35   | 0.009852 | 0.054476356 | Wbp4    | WW domain binding protein 4 [Source:RGD Symbol;Acc:620033]                                                | 2 |
| ENSRNOG000000034198  | 2104.58  | 2081.12  | 2128.05  | 1.02 | 0.03   | 0.760494 | 0.987230111 | Wbp5    | WW domain binding protein 5 [Source:RGD Symbol;Acc:1592975]                                               | 5 |
| ENSRNOG000000024435  | 1449.91  | 1331.43  | 1568.39  | 1.18 | 0.24   | 0.008763 | 0.049682758 | Wbscr17 | Williams-Beuren syndrome chromosome region 17 [Source:RGD Symbol;Acc:1563452]                             | 2 |
| ENSRNOG000000015080  | 722.06   | 681.82   | 762.30   | 1.12 | 0.16   | 0.106805 | 0.31676111  | Wdfy1   | WD repeat and FYVE domain containing 1 [Source:RGD Symbol;Acc:1305996]                                    | 2 |
| ENSRNOG000000011167  | 266.98   | 272.32   | 261.63   | 0.96 | -0.06  | 0.697452 | 0.946474068 | Wdhd1   | WD repeat and HMGB-box DNA binding protein 1 [Source:RGD Symbol;Acc:1310200]                              | 2 |
| ENSRNOG000000015636  | 556.06   | 579.59   | 532.53   | 0.92 | -0.12  | 0.28345  | 0.588548363 | Wdr34   | WD repeat domain 34 [Source:RGD Symbol;Acc:1359465]                                                       | 2 |
| ENSRNOG000000020807  | 4.45     | 3.84     | 5.06     | 1.32 | 0.40   | 0.616899 | 0.889224994 | Wdr62   | WD repeat domain 62 [Source:RGD Symbol;Acc:1306714]                                                       | 2 |
| ENSRNOG000000038083  | 1.91     | 0.75     | 3.08     | 4.12 | 2.04   | 0.055717 | 0.200595361 | Wdr64   | WD repeat domain 64 [Source:RGD Symbol;Acc:1591103]                                                       | 2 |
| ENSRNOG000000032343  | 970.77   | 1038.86  | 902.69   | 0.87 | -0.20  | 0.046094 | 0.174278311 | Wdr81   | WD repeat domain 81 [Source:RGD Symbol;Acc:1311334]                                                       | 2 |
| ENSRNOG000000005990  | 584.49   | 597.82   | 571.16   | 0.96 | -0.07  | 0.568733 | 0.852854752 | Wdsu1   | WD repeat, sterile alpha motif and U-box domain containing 1 [Source:RGD Symbol;Acc:1359296]              | 1 |
| ENSRNOG000000026067  | 2.38     | 3.11     | 1.65     | 0.53 | -0.92  | 0.350567 | 0.667423874 | Wfdc10  | WAP four-disulfide core domain 10 [Source:RGD Symbol;Acc:1596480]                                         | 3 |
| ENSRNOG000000014739  | 58.26    | 66.76    | 49.77    | 0.75 | -0.42  | 0.068116 | 0.230661135 | Wfdc2   | WAP four-disulfide core domain 2 [Source:RGD Symbol;Acc:628757]                                           | 5 |
| ENSRNOG000000013760  | 3.08     | 3.06     | 3.09     | 1.01 | 0.02   | 1        | 1           | Wfdc5   | WAP four-disulfide core domain 5 [Source:RGD Symbol;Acc:1304986]                                          | 3 |
| ENSRNOG000000018406  | 1101.39  | 1086.00  | 1116.79  | 1.03 | 0.04   | 0.752963 | 0.983702988 | Wipf1   | WAS/WASL interacting protein family, member 1 [Source:RGD Symbol;Acc:620887]                              | 2 |
| ENSRNOG000000009571  | 2910.93  | 2453.65  | 3368.21  | 1.37 | 0.46   | 1.16E-08 | 3.31E-07    | Wipf3   | WAS/WASL interacting protein family, member 3 [Source:RGD Symbol;Acc:708559]                              | 2 |
| ENSRNOG000000006217  | 1469.62  | 1490.23  | 1449.01  | 0.97 | -0.04  | 0.68259  | 0.94097638  | Wiz     | widely-interspaced zinc finger motifs [Source:RGD Symbol;Acc:1307771]                                     | 2 |
| ENSRNOG000000009956  | 4802.09  | 4064.46  | 5539.73  | 1.36 | 0.45   | 6.36E-09 | 1.91E-07    | Wnk1    | WNK lysine deficient protein kinase 1 [Source:RGD Symbol;Acc:621141]                                      | 1 |
| ENSRNOG000000015982  | 50.74    | 56.98    | 44.50    | 0.78 | -0.36  | 0.192186 | 0.46612322  | Wnt11   | wingless-type MMTV integration site family, member 11 [Source:RGD Symbol;Acc:621463]                      | 5 |
| ENSRNOG000000005781  | 211.11   | 192.01   | 230.21   | 1.20 | 0.26   | 0.10826  | 0.320179578 | Wnt16   | wingless-type MMTV integration site family, member 16 [Source:RGD Symbol;Acc:1562253]                     | 2 |
| ENSRNOG000000014385  | 140.82   | 155.43   | 126.21   | 0.81 | -0.30  | 0.096199 | 0.295037503 | Wnt2b   | wingless-type MMTV integration site family, member 2B [Source:RGD Symbol;Acc:69346]                       | 5 |
| ENSRNOG000000003166  | 65.80    | 61.48    | 70.13    | 1.14 | 0.19   | 0.43871  | 0.757832383 | Wnt4    | wingless-type MMTV integration site family, member 4 [Source:RGD Symbol;Acc:621348]                       | 3 |
| ENSRNOG000000012929  | 2175.07  | 2151.52  | 2198.61  | 1.02 | 0.03   | 0.787713 | 1           | Wsb1    | WD repeat and SOCS box-containing 1 [Source:RGD Symbol;Acc:1307835]                                       | 2 |
| ENSRNOG000000037371  | 159.70   | 151.44   | 167.95   | 1.11 | 0.15   | 0.420579 | 0.740714499 | XAF1    | XIAP associated factor-1 [Source:RGD Symbol;Acc:1585988]                                                  | 2 |
| ENSRNOG000000010298  | 2640.88  | 2519.67  | 2762.09  | 1.10 | 0.13   | 0.125704 | 0.35135899  | Xbp1    | X-box binding protein 1 [Source:RGD Symbol;Acc:1303073]                                                   | 2 |
| ENSRNOG000000007081  | 697.45   | 709.21   | 685.69   | 0.97 | -0.05  | 0.697642 | 0.946556468 | Xdh     | xanthine dehydrogenase [Source:RGD Symbol;Acc:62043]                                                      | 1 |
| ENSRNOG000000009180  | 104.94   | 97.76    | 112.12   | 1.15 | 0.20   | 0.322927 | 0.635573622 | Xkr7    | XK, Kell blood group complex subunit-related family, member 7 [Source:RGD Symbol;Acc:1359224]             | 2 |
| ENSRNOG000000013288  | 1696.92  | 1605.63  | 1788.21  | 1.11 | 0.16   | 0.065696 | 0.225294339 | Xpo7    | exportin 7 [Source:RGD Symbol;Acc:1310928]                                                                | 2 |
| ENSRNOG000000003728  | 1913.18  | 2101.81  | 1724.55  | 0.82 | -0.29  | 0.008068 | 0.00757741  | Xylt2   | xylosyltransferase II [Source:RGD Symbol;Acc:619765]                                                      | 2 |
| ENSRNOG0000000001861 | 536.98   | 555.80   | 518.16   | 0.93 | -0.10  | 0.365208 | 0.681515678 | Ydjc    | YdjC homolog (bacterial) [Source:RGD Symbol;Acc:1359227]                                                  | 2 |
| ENSRNOG000000005689  | 986.45   | 985.67   | 987.23   | 1.00 | 0.00   | 0.986454 | 1           | Yeats4  | YEATS domain containing 4 [Source:RGD Symbol;Acc:1305741]                                                 | 2 |
| ENSRNOG000000001858  | 90.60    | 88.86    | 92.34    | 1.04 | 0.06   | 0.786029 | 1           | Ypel1   | yippepe-like 1 (Drosophila) [Source:RGD Symbol;Acc:2321291]                                               | 5 |
| ENSRNOG0000000019721 | 8853.01  | 8881.24  | 8824.78  | 0.99 | -0.01  | 0.897909 | 1           | Ypel3   | yippepe-like 3 (Drosophila) [Source:RGD Symbol;Acc:1564579]                                               | 2 |
| ENSRNOG000000008195  | 41974.12 | 39375.82 | 44572.42 | 1.13 | 0.18   | 0.039746 | 0.156557346 | Ywhaz   | tyrosine 3-monooxygenase/tryptophan 5-monooxygenase activation protein, zeta [Source:RGD Symbol;Acc:3980] | 1 |
| ENSRNOG000000016239  | 688.59   | 738.81   | 638.38   | 0.86 | -0.21  | 0.055929 | 0.201189007 | Zadh2   | zinc binding alcohol dehydrogenase, domain containing 2 [Source:RGD Symbol;Acc:1309999]                   | 2 |
| ENSRNOG000000011319  | 136.94   | 128.97   | 144.91   | 1.12 | 0.17   | 0.351437 | 0.668347813 | Zbtb10  | zinc finger and BTB domain containing 10 [Source:RGD Symbol;Acc:708377]                                   | 2 |
| ENSRNOG0000000037562 | 177.08   | 187.56   | 166.59   | 0.89 | -0.17  | 0.335513 | 0.648863839 | Zbtb42  | zinc finger and BTB domain containing 42 [Source:RGD Symbol;Acc:1582758]                                  | 2 |
| ENSRNOG000000005578  | 158.42   | 160.61   | 156.22   | 0.97 | -0.04  | 0.876615 | 1           | Zbtb44  | zinc finger and BTB domain containing 44 [Source:RGD Symbol;Acc:1308984]                                  | 2 |
| ENSRNOG000000009595  | 350.70   | 393.07   | 308.33   | 0.78 | -0.35  | 0.011649 | 0.061698327 | Zbtb48  | zinc finger and BTB domain containing 48 [Source:RGD Symbol;Acc:1311581]                                  | 2 |
| ENSRNOG000000016041  | 28.54    | 42.93    | 14.16    | 0.33 | -1.60  | 7.09E-07 | 1.46E-05    | Zc3h12d | zinc finger CCHC type containing 12D [Source:RGD Symbol;Acc:1597152]                                      | 3 |
| ENSRNOG000000002420  | 1145.16  | 1230.01  | 1060.32  | 0.86 | -0.21  | 0.020924 | 0.097378985 | Zc3h7a  | zinc finger CCHC type containing 7A [Source:RGD Symbol;Acc:1311225]                                       | 2 |
| ENSRNOG000000013948  | 478.43   | 447.46   | 509.40   | 1.14 | 0.19   | 0.12808  | 0.36579592  | Zc3h7a  | zinc finger CCHC type, antiviral 1 [Source:RGD Symbol;Acc:628694]                                         | 2 |
| ENSRNOG000000013162  | 815.10   | 788.71   | 841.49   | 1.07 | 0.09   | 0.388758 | 0.705791391 | Zcchc12 | zinc finger, CCHC domain containing 12 [Source:RGD Symbol;Acc:1359439]                                    | 3 |
| ENSRNOG000000031638  | 35.04    | 27.57    | 42.51    | 1.54 | 0.62   | 0.034496 | 0.141110132 | Zcchc16 | zinc finger, CCHC domain containing 16 [Source:RGD Symbol;Acc:1588188]                                    | 5 |
| ENSRNOG0000000047525 | 5417.47  | 5164.10  | 5670.84  | 1.10 | 0.14   | 0.089658 | 0.281310879 | Zcchc18 | zinc finger, CCHC domain containing 18 [Source:RGD Symbol;Acc:1591868]                                    | 2 |
| ENSRNOG000000013078  | 780.45   | 811.55   | 749.34   | 0.92 | -0.12  | 0.252214 | 0.549547576 | Zcchc7  | zinc finger, CCHC domain containing 7 [Source:RGD Symbol;Acc:1310467]                                     | 2 |
| ENSRNOG0000000014927 | 1132.97  | 1109.51  | 1156.43  | 1.04 | 0.06   | 0.521686 | 0.821981212 | Zcchc9  | zinc finger, CCHC domain containing 9 [Source:RGD Symbol;Acc:1307450]                                     | 2 |
| ENSRNOG000000015791  | 287.59   | 308.88   | 266.31   | 0.86 | -0.21  | 0.134507 | 0.368995783 | Zdhhc12 | zinc finger, DHHC-type containing 12 [Source:RGD Symbol;Acc:1306593]                                      | 5 |
| ENSRNOG000000014277  | 751.22   | 667.99   | 834.45   | 1.25 | 0.32   | 0.00363  | 0.024397539 | Zdhhc13 | zinc finger, DHHC-type containing 13 [Source:RGD Symbol;Acc:1309736]                                      | 2 |
| ENSRNOG0000000029049 | 931.64   | 912.95   | 950.33   | 1.04 | 0.06   | 0.574037 | 0.857120757 | Zdhhc14 | zinc finger, DHHC-type containing 14 [Source:RGD Symbol;Acc:1565877]                                      | 2 |
| ENSRNOG000000027179  | 302.13   | 275.25   | 329.01   | 1.20 | 0.26   | 0.090042 | 0.282180067 | Zdhhc23 | zinc finger, DHHC-type containing 23 [Source:RGD Symbol;Acc:1303254]                                      | 5 |
| ENSRNOG000000004677  | 1260.47  | 1124.25  | 1396.69  | 1.24 | 0.31   | 0.000799 | 0.007101682 | Zeb2    | zinc finger E-box binding homeobox 2 [Source:RGD Symbol;Acc:1307272]                                      | 1 |
| ENSRNOG000000018639  | 1388.88  | 1430.25  | 1347.51  | 0.94 | -0.09  | 0.318822 | 0.630848067 | Zfand2b | zinc finger, AN1 type domain 2B [Source:RGD Symbol;Acc:1306260]                                           | 2 |
| ENSRNOG000000018107  | 6086.44  | 5668.19  | 6504.69  | 1.15 | 0.20   | 0.010865 | 0.058370401 | Zfand5  | zinc finger, AN1-type domain 5 [Source:RGD Symbol;Acc:1310776]                                            | 1 |
| ENSRNOG000000013506  | 1931.79  | 1869.13  | 1945.45  | 1.07 | 0.09   | 0.328349 | 0.640548423 | Zfand6  | zinc finger, AN1-type domain 6 [Source:RGD Symbol;Acc:1359317]                                            | 1 |
| ENSRNOG000000025634  | 519.70   | 468.45   | 570.95   | 1.22 | 0.29   | 0.015248 | 0.076265271 | Zfhx2   | zinc finger homeobox 2 [Source:RGD Symbol;Acc:735143]                                                     | 5 |
| ENSRNOG000000014452  | 386.99   | 300.04   | 473.93   | 1.58 | 0.66   | 3.25E-07 | 7.14E-06    | Zfhx3   | zinc finger homeobox 3 [Source:RGD Symbol;Acc:1560268]                                                    | 2 |
| ENSRNOG000000008765  | 133.52   | 142.89   | 124.15   | 0.87 | -0.20  | 0.342077 | 0.656936954 | Zfhx4   | zinc finger homeobox 4 [Source:RGD Symbol;Acc:1563022]                                                    | 2 |
| ENSRNOG000000029022  | 181.43   | 188.40   | 174.46   | 0.93 | -0.11  | 0.484652 | 0.789550698 | Zfp112  | zinc finger protein 112 [Source:RGD Symbol;Acc:1305757]                                                   | 2 |
| ENSRNOG000000006112  | 111.59   | 97.13    | 126.04   | 1.30 | 0.38   | 0.067869 | 0.230118081 | Zfp120  | zinc finger protein 120 [Source:MGI Symbol;Acc:MGI:1345179]                                               | 2 |
| ENSRNOG000000030932  | 0.48     | 0.96     | 0.00     | 0.00 | #NAME? | 0.122359 | 0.345987555 | Zfp14   | ZFP14 zinc finger protein [Source:RGD Symbol;Acc:1560188]                                                 | 2 |
| ENSRNOG000000047132  | 225.78   | 190.21   | 261.34   | 1.37 | 0.46   | 0.005577 | 0.034481195 | Zfp182  | zinc finger protein 182 [Source:RGD Symbol;Acc:6490591]                                                   | 2 |
| ENSRNOG0000000005842 | 1055.47  | 1021.86  | 1089.08  | 1.07 | 0.09   | 0.340525 | 0.655601039 | Zfp280d | zinc finger protein 280D [Source:RGD Symbol;Acc:1560796]                                                  | 2 |
| ENSRNOG000000031031  | 556.64   | 508.92   | 604.36   | 1.19 | 0.25   | 0.040517 | 0.158759002 | Zfp292  | zinc finger protein 292 [Source:RGD Symbol;Acc:61931]                                                     | 2 |
| ENSRNOG000000049605  | 30.96    | 33.09    | 28.83    | 0.87 | -0.20  | 0.558037 | 0.84285684  | Zfp296  | zinc finger protein 296 [Source:RGD Symbol;Acc:1595818]                                                   | 2 |
| ENSRNOG000000019673  | 355.98   | 412.65   | 299.32   | 0.73 | -0.46  | 0.00079  | 0.007032446 | Zfp36   | zinc finger protein 36 [Source:RGD Symbol;Acc:620722]                                                     | 3 |
| ENSRNOG000000011675  | 363.98   | 323.37   | 404.60   | 1.25 | 0.32   | 0.023356 | 0.105951936 | Zfp40   | zinc finger protein 40 [Source:RGD Symbol;Acc:1593410]                                                    | 2 |
| ENSRNOG000000019802  | 646.34   | 705.16   | 587.52   | 0.83 | -0.26  | 0.019931 | 0.093733009 | Zfp428  | zinc finger protein 428 [Source:RGD Symbol;Acc:1564862]                                                   | 2 |
| ENSRNOG000000016874  | 1232.87  | 1209.54  | 1256.20  | 1.04 | 0.05   | 0.529399 | 0.828607955 | Zfp521  | zinc finger protein 521 [Source:RGD Symbol;Acc:1307345]                                                   | 2 |
| ENSRNOG000000016874  | 1232.87  | 1209.54  | 1256.20  | 1.04 | 0.05   | 0.529399 | 0.828607955 | Zfp521  | zinc finger protein 521 [Source:RGD Symbol;Acc:1307345]                                                   | 2 |
| ENSRNOG0000000005051 | 1256.34  | 1351.46  | 1161.22  | 0.86 | -0.22  | 0.0213   | 0.098625642 | Zfp523  | zinc finger protein 523 [Source:RGD Symbol;Acc:1306239]                                                   | 3 |
| ENSRNOG000000029957  | 76.01    | 68.01    | 84.00    | 1.24 | 0.30   | 0.146353 | 0.391228801 | Zfp54   | zinc finger protein 54 [Source:RGD Symbol;Acc:1307738]                                                    | 2 |
| ENSRNOG000000048394  | 490.63   | 427.15   | 554.12   | 1.30 | 0.38   | 0.003497 | 0.023701963 | Zfp560  | zinc finger protein 560 [Source:RGD Symbol;Acc:2323078]                                                   | 2 |
| ENSRNOG000000022730  | 139.57   | 125.76   | 153.38   | 1.22 | 0.29   | 0.124419 | 0.349018688 | Zfp57   | zinc finger protein 57 [Source:RGD Symbol;Acc:1302981]                                                    | 2 |
| ENSRNOG000000024065  | 85.87    | 95.85    | 75.89    | 0.79 | -0.34  | 0.131303 | 0.362484496 | Zfp575  | zinc finger protein                                                                                       |   |

|                    |         |         |         |      |       |          |             |          |                                                                     |   |
|--------------------|---------|---------|---------|------|-------|----------|-------------|----------|---------------------------------------------------------------------|---|
| ENSRNOG00000012397 | 1557.10 | 1492.49 | 1621.71 | 1.09 | 0.12  | 0.187984 | 0.459405508 | Zmym4    | zinc finger, MYM-type 4 [Source:RGD Symbol;Acc:1309545]             | 2 |
| ENSRNOG00000013865 | 646.37  | 631.97  | 660.76  | 1.05 | 0.06  | 0.598355 | 0.874194889 | Zmym6    | zinc finger, MYM-type 6 [Source:RGD Symbol;Acc:1561833]             | 2 |
| ENSRNOG00000019154 | 1896.97 | 1973.78 | 1820.17 | 0.92 | -0.12 | 0.192725 | 0.467117009 | Zmynd8   | zinc finger, MYND-type containing 8 [Source:RGD Symbol;Acc:1309544] | 2 |
| ENSRNOG0000001418  | 745.47  | 810.42  | 680.51  | 0.84 | -0.25 | 0.018864 | 0.0899032   | Znhit1   | zinc finger, HIT-type containing 1 [Source:RGD Symbol;Acc:2322870]  | 2 |
| ENSRNOG00000015525 | 369.59  | 365.34  | 373.85  | 1.02 | 0.03  | 0.794021 |             | 1 Zswim3 | zinc finger, SWIM-type containing 3 [Source:RGD Symbol;Acc:1309789] | 2 |
